# Supplementary material for: Photocatalytic intermolecular bromonitroalkylation of styrenes: synthesis of cyclopropylamine derivatives and their evaluation as LSD1 inhibitors
Source: Royal Society of Chemistry journal article supplement (doi:10.1039/d3ra07830b), 2024-01-01

Figure 1. <sup>1</sup>H NMR (CDCl<sub>3</sub>) of **8b**

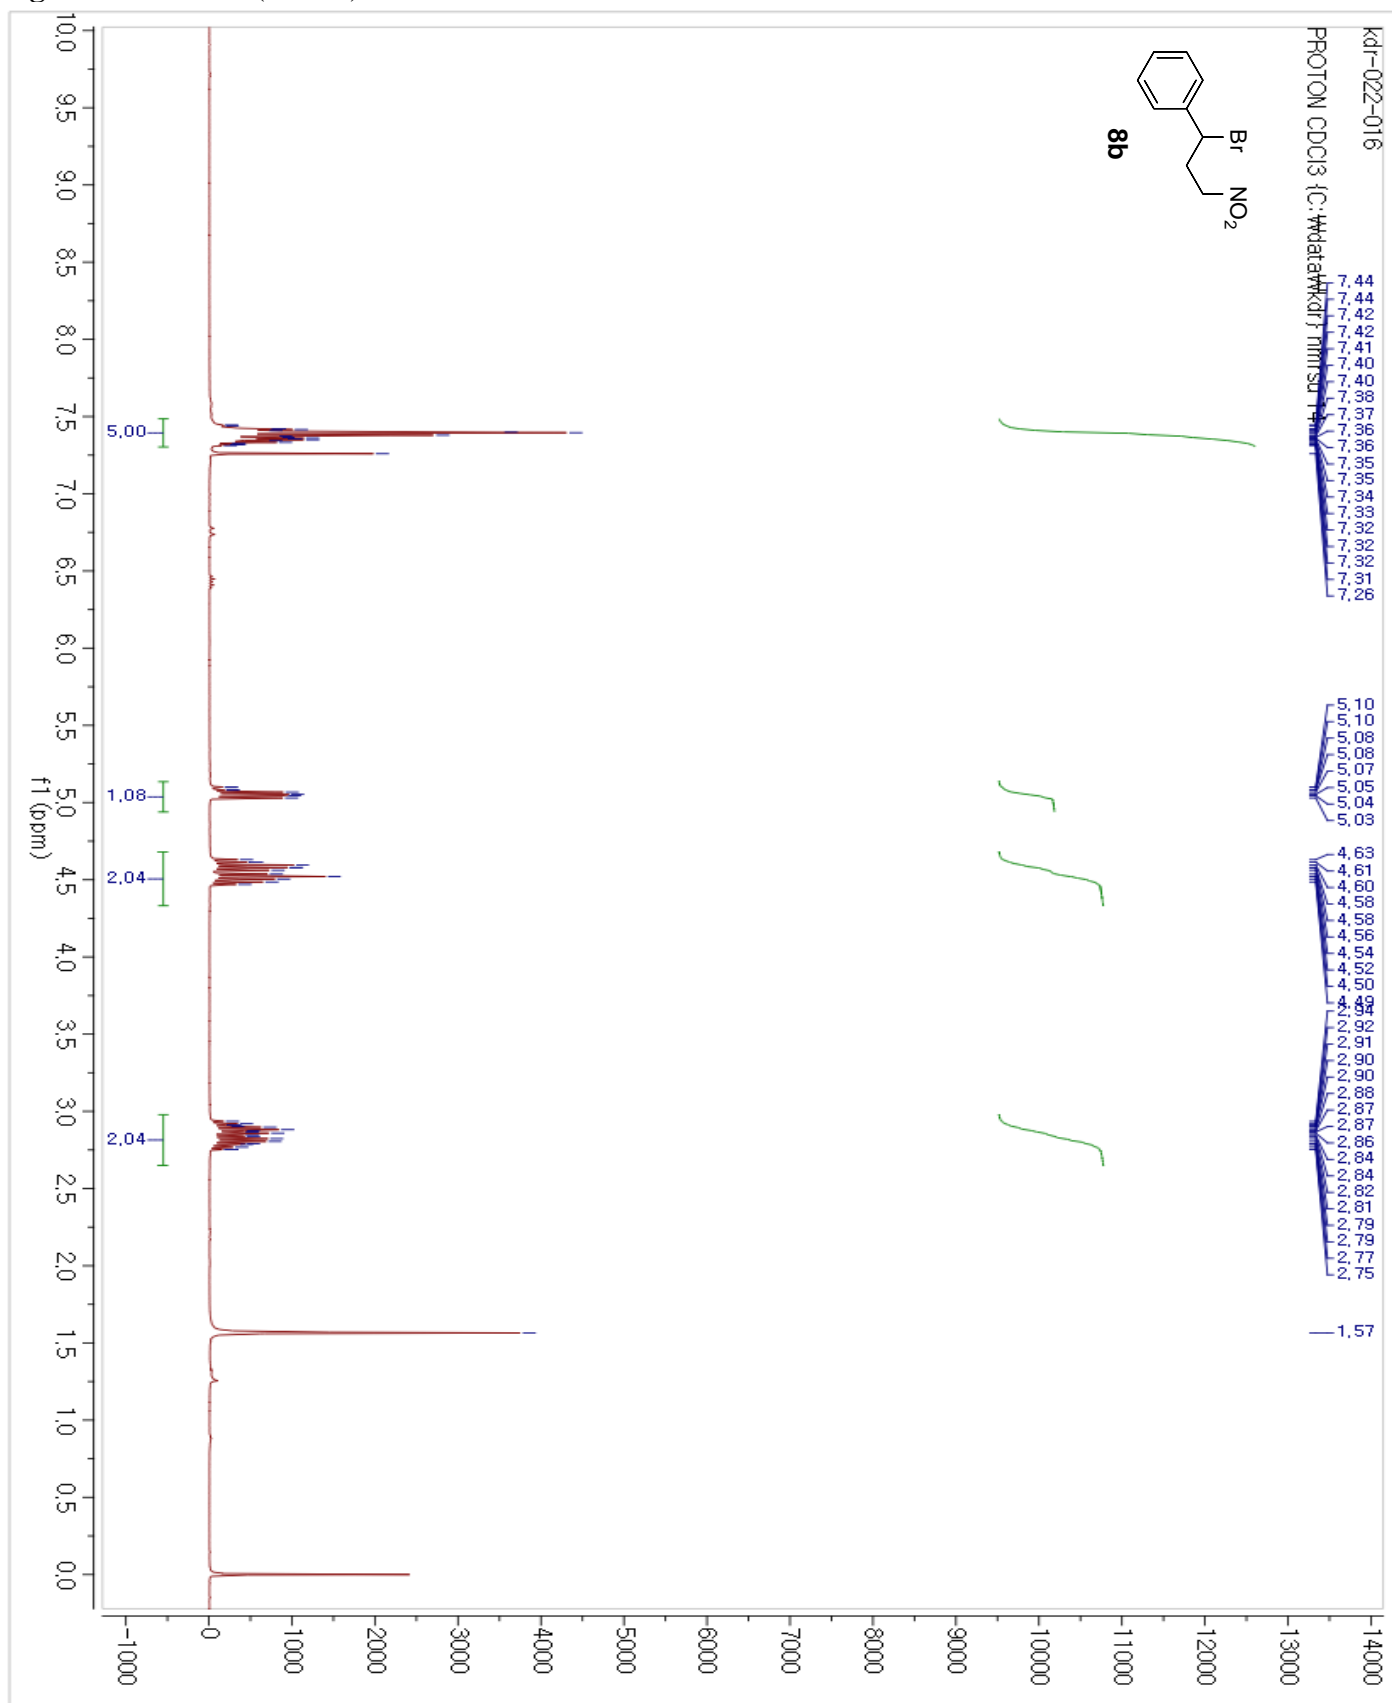

**Figure 2.**  $^{13}\text{C}$  NMR ( $\text{CDCl}_3$ ) of **8b**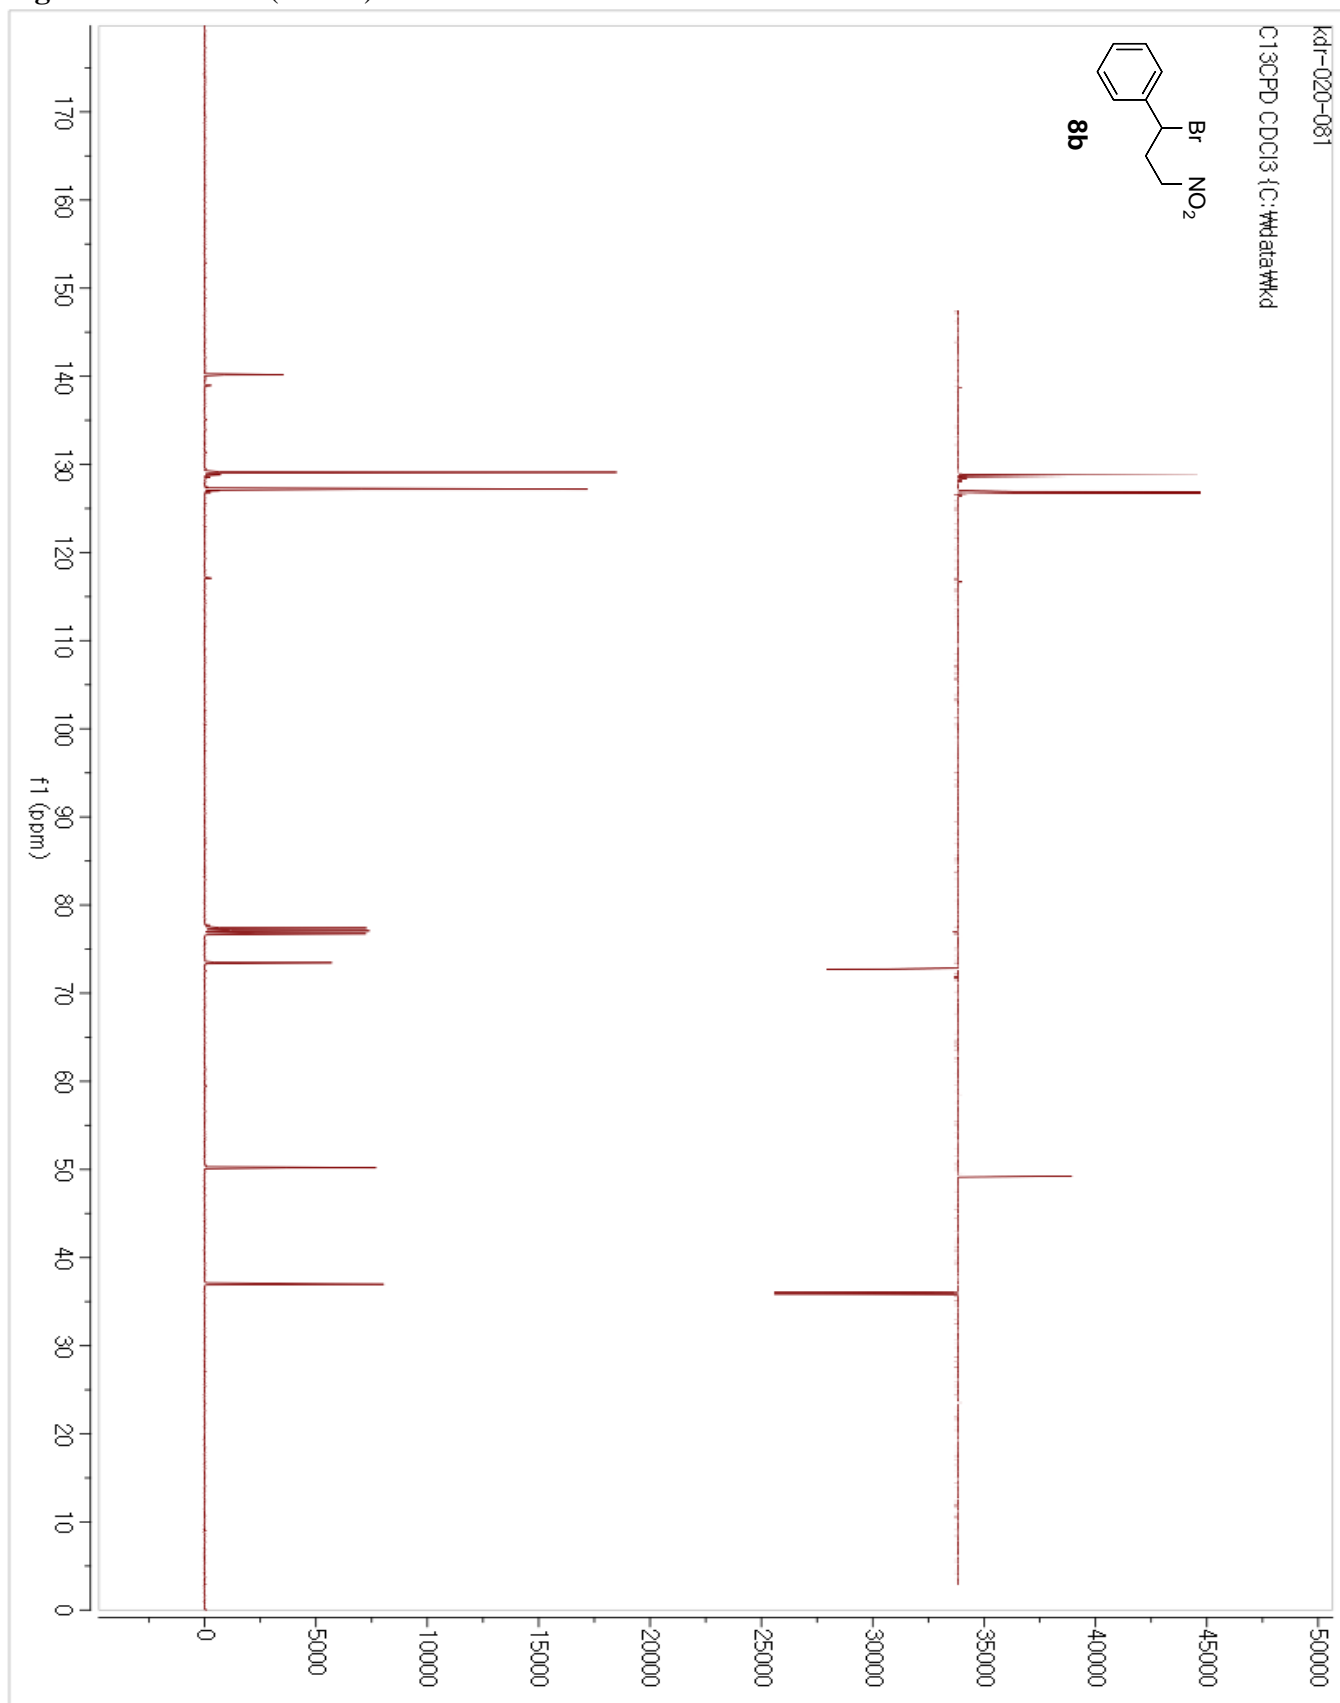

**Figure 3.**  $^1\text{H}$  NMR ( $\text{CDCl}_3$ ) of **8c**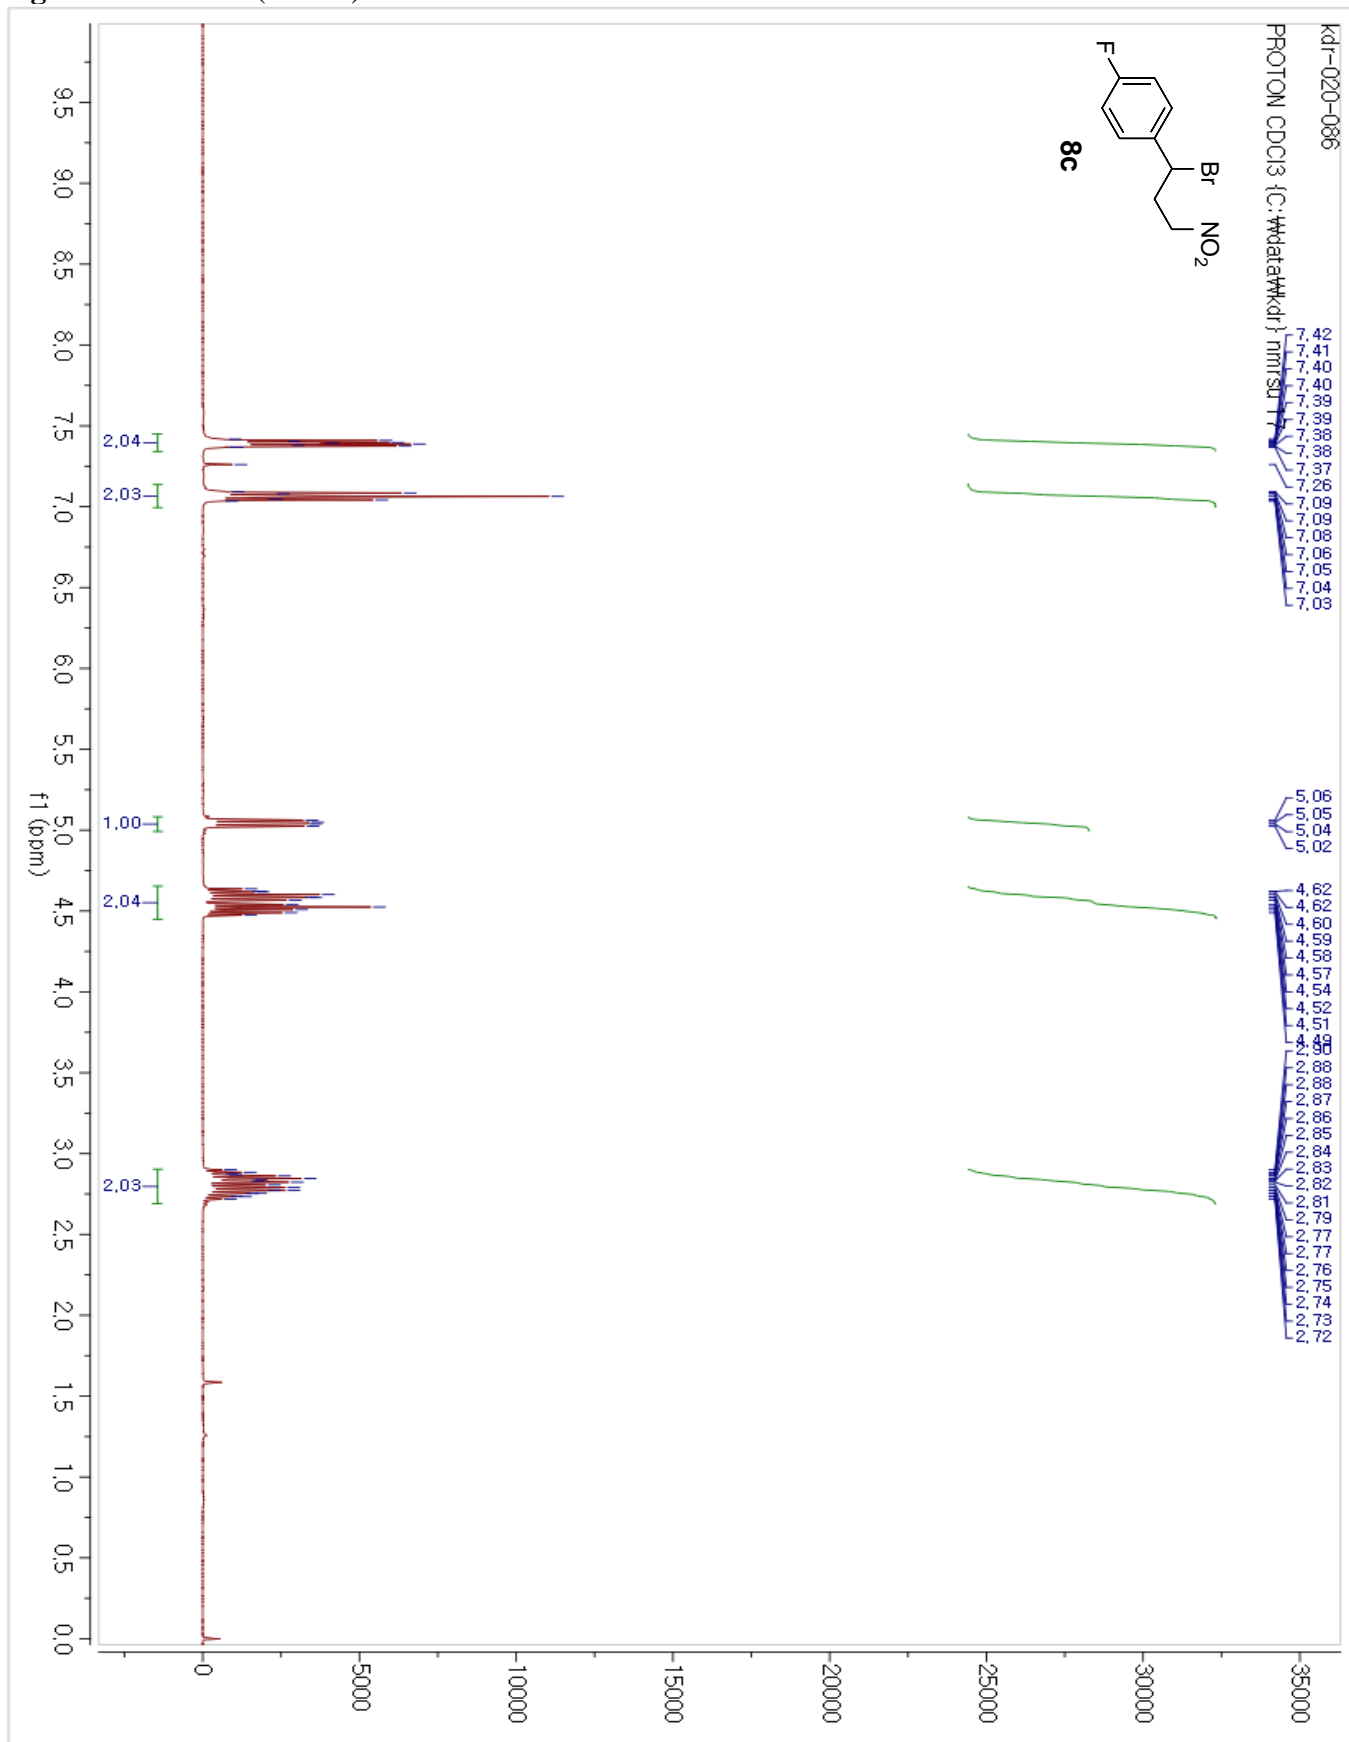



Figure 5.  $^1\text{H}$  NMR ( $\text{CDCl}_3$ ) of **8d**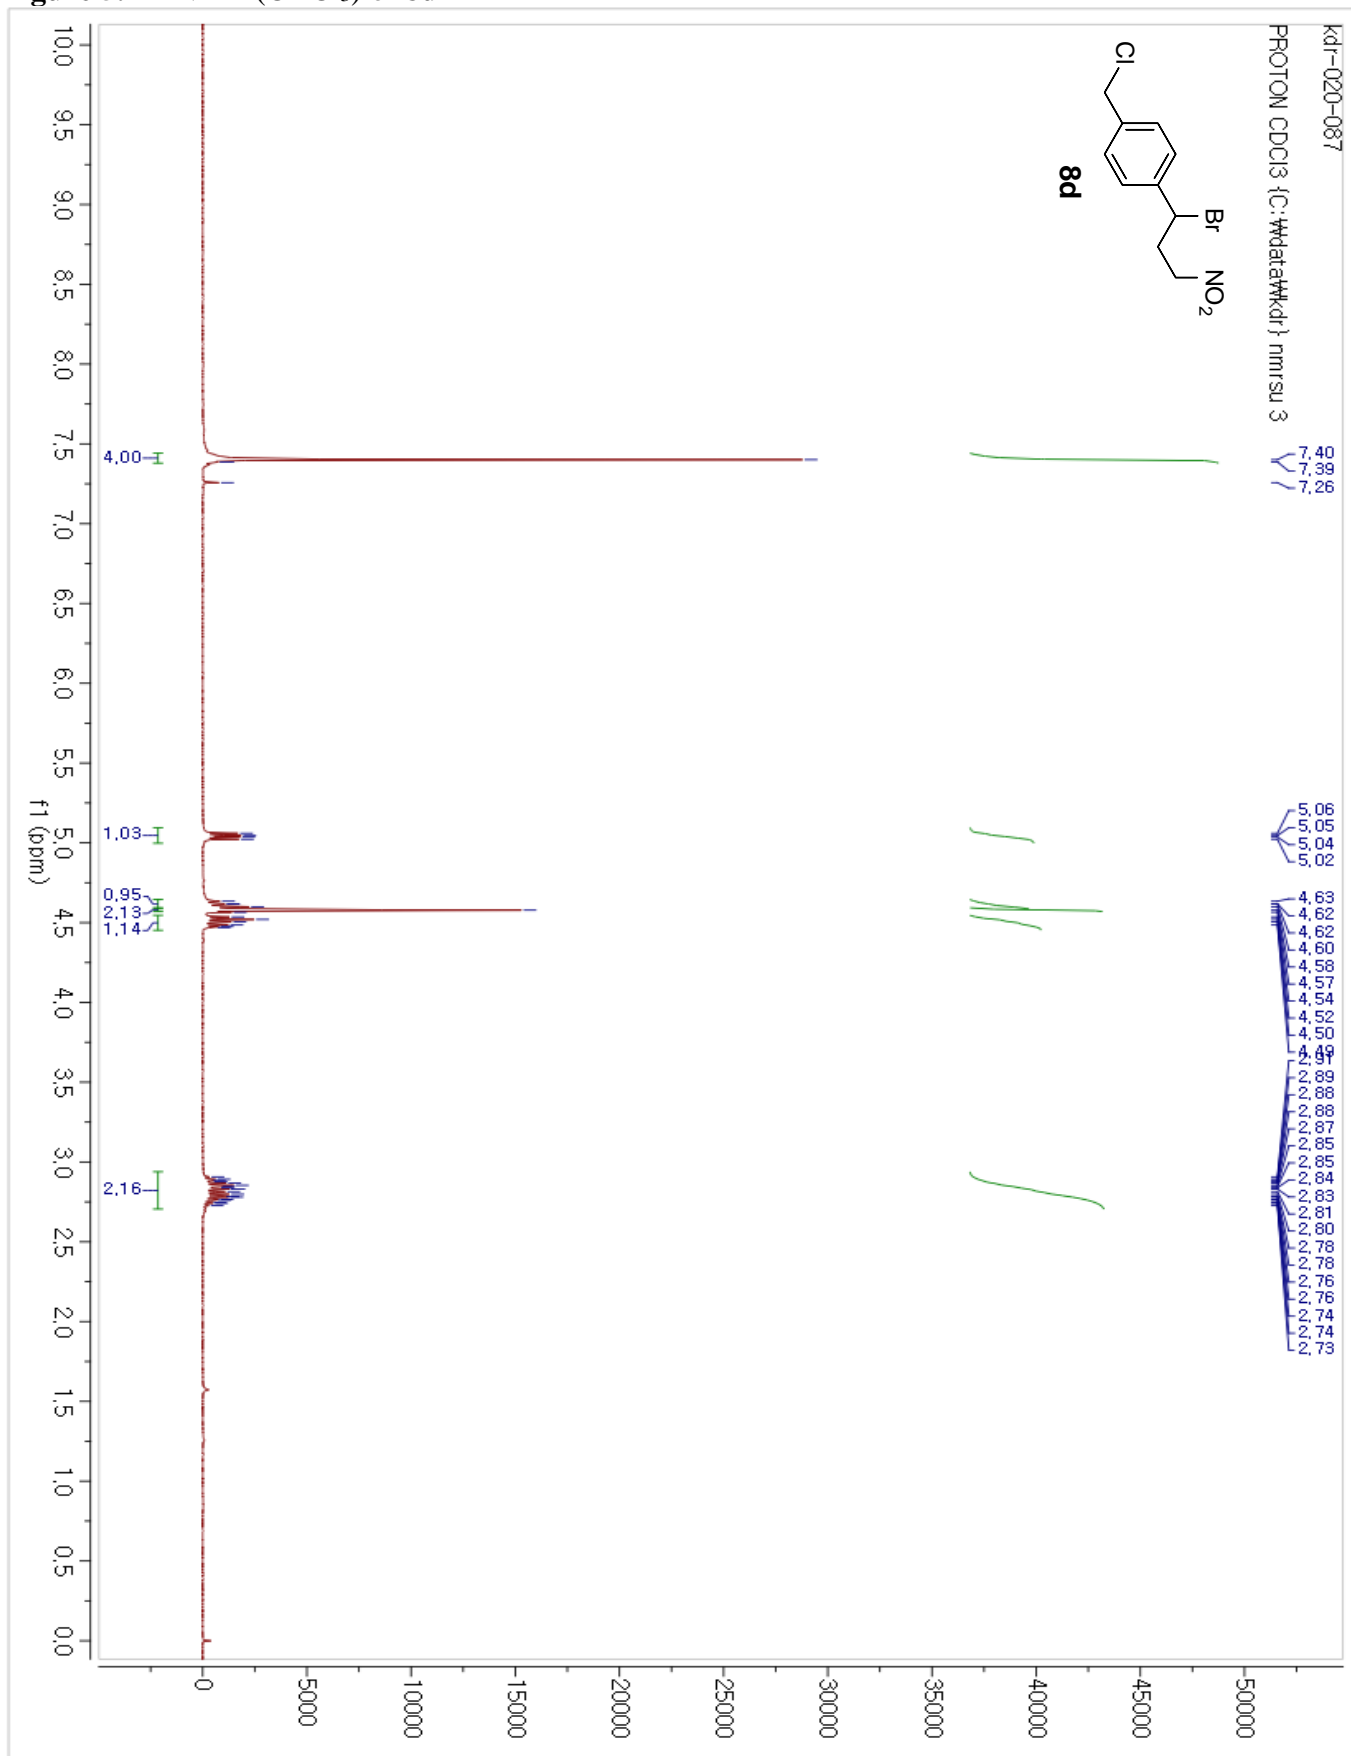

**Figure 6.**  $^{13}\text{C}$  NMR ( $\text{CDCl}_3$ ) of **8d**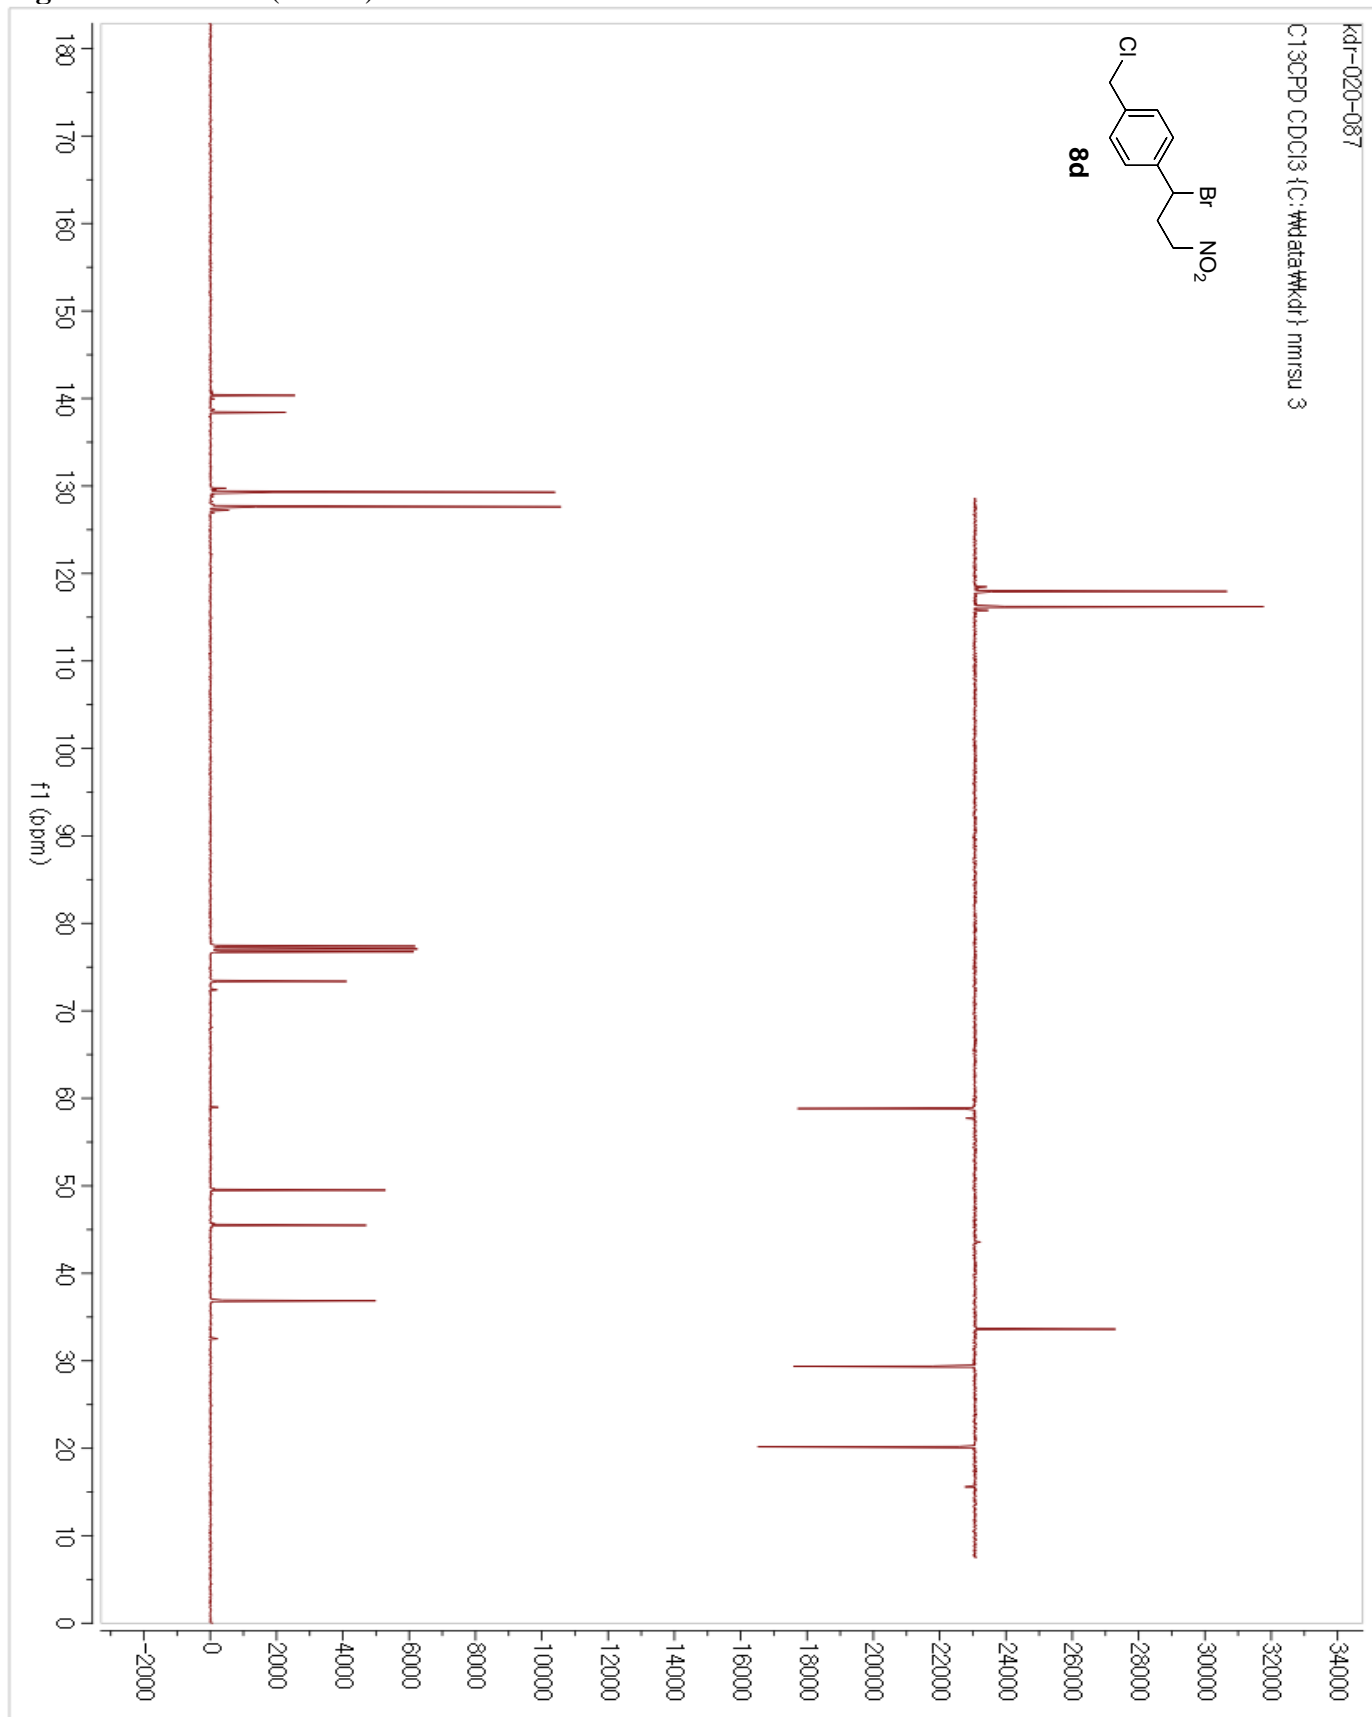

Figure 7.  $^1\text{H}$  NMR ( $\text{CDCl}_3$ ) of **8e**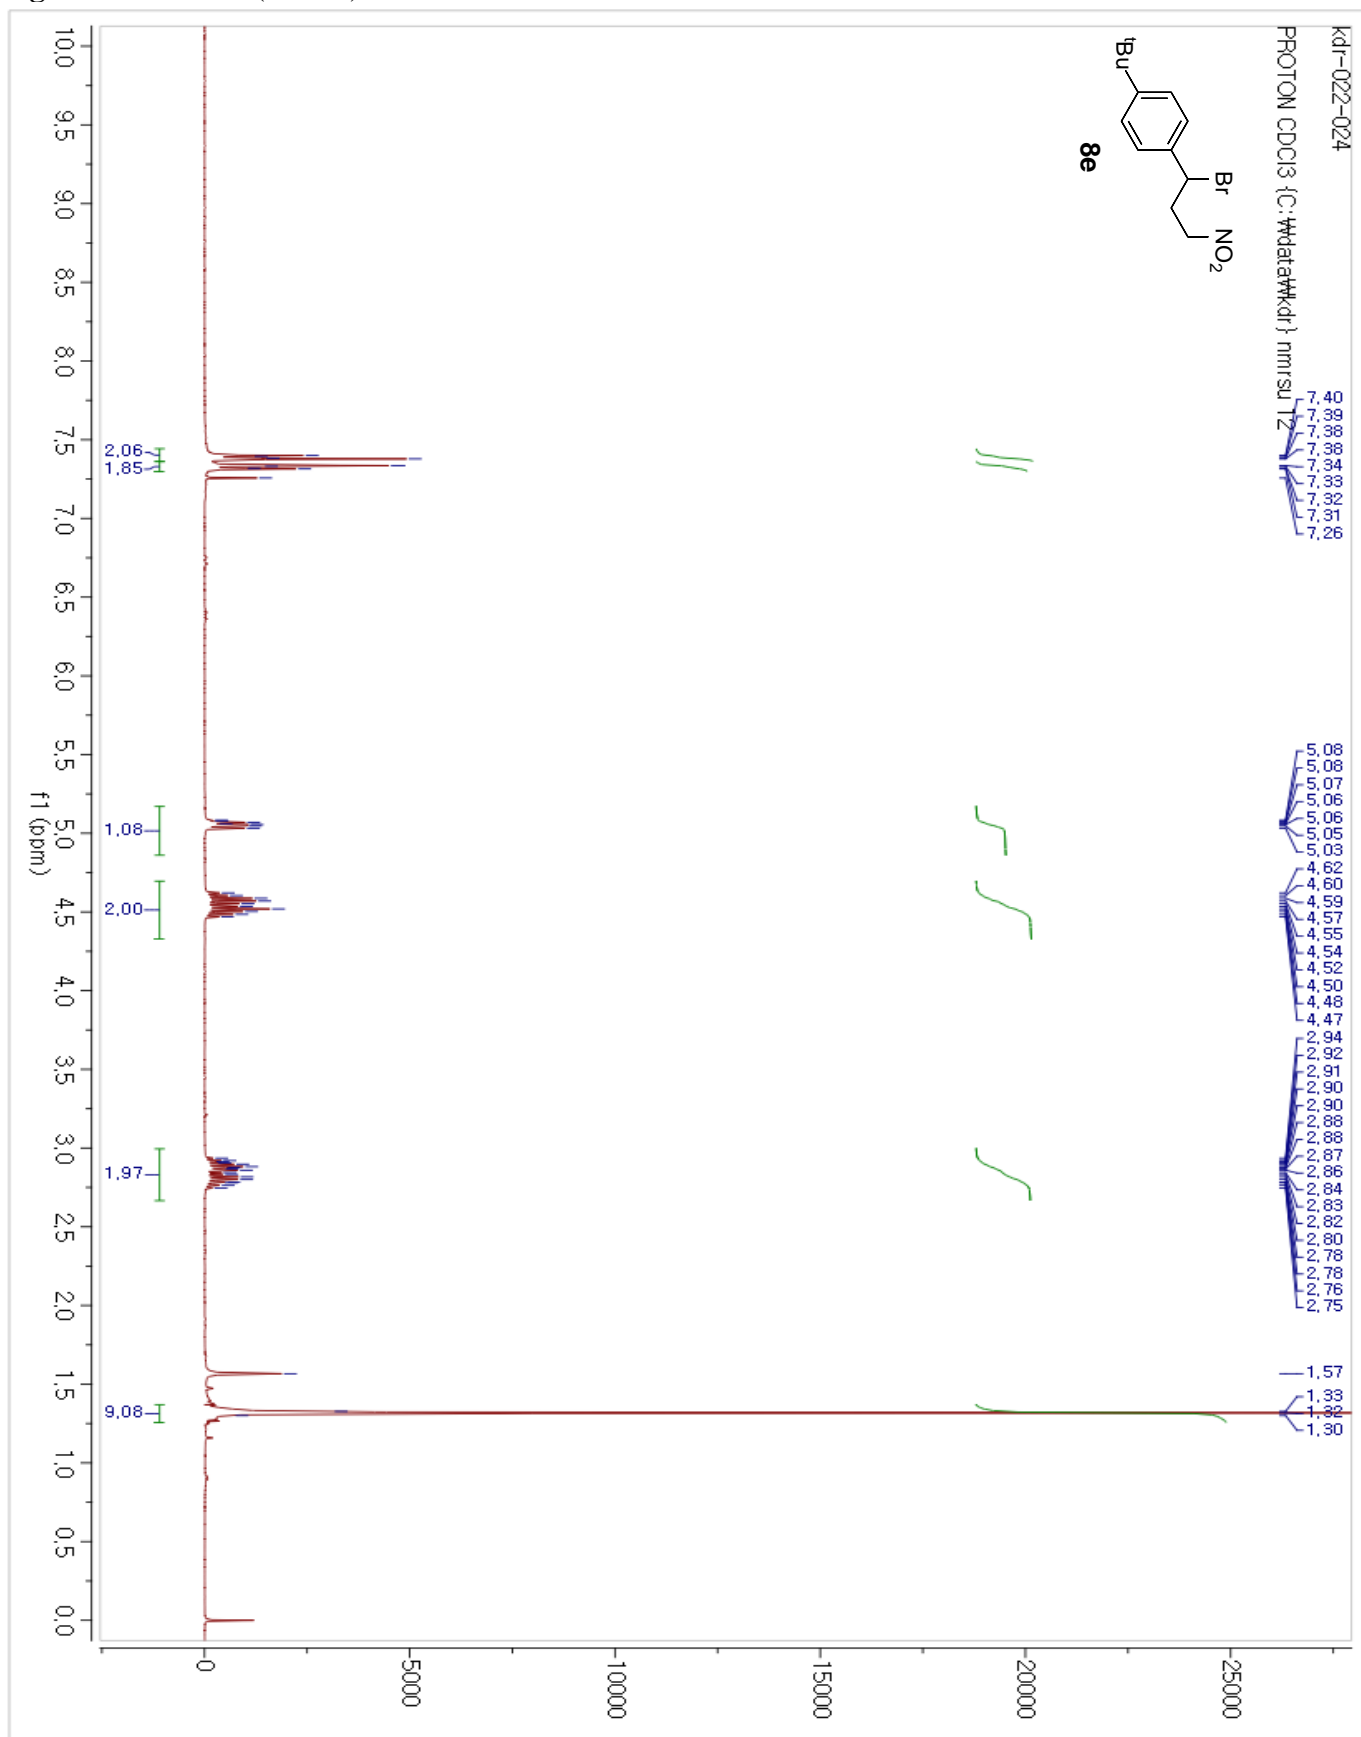

**Figure 8.**  $^{13}\text{C}$  NMR ( $\text{CDCl}_3$ ) of **8e**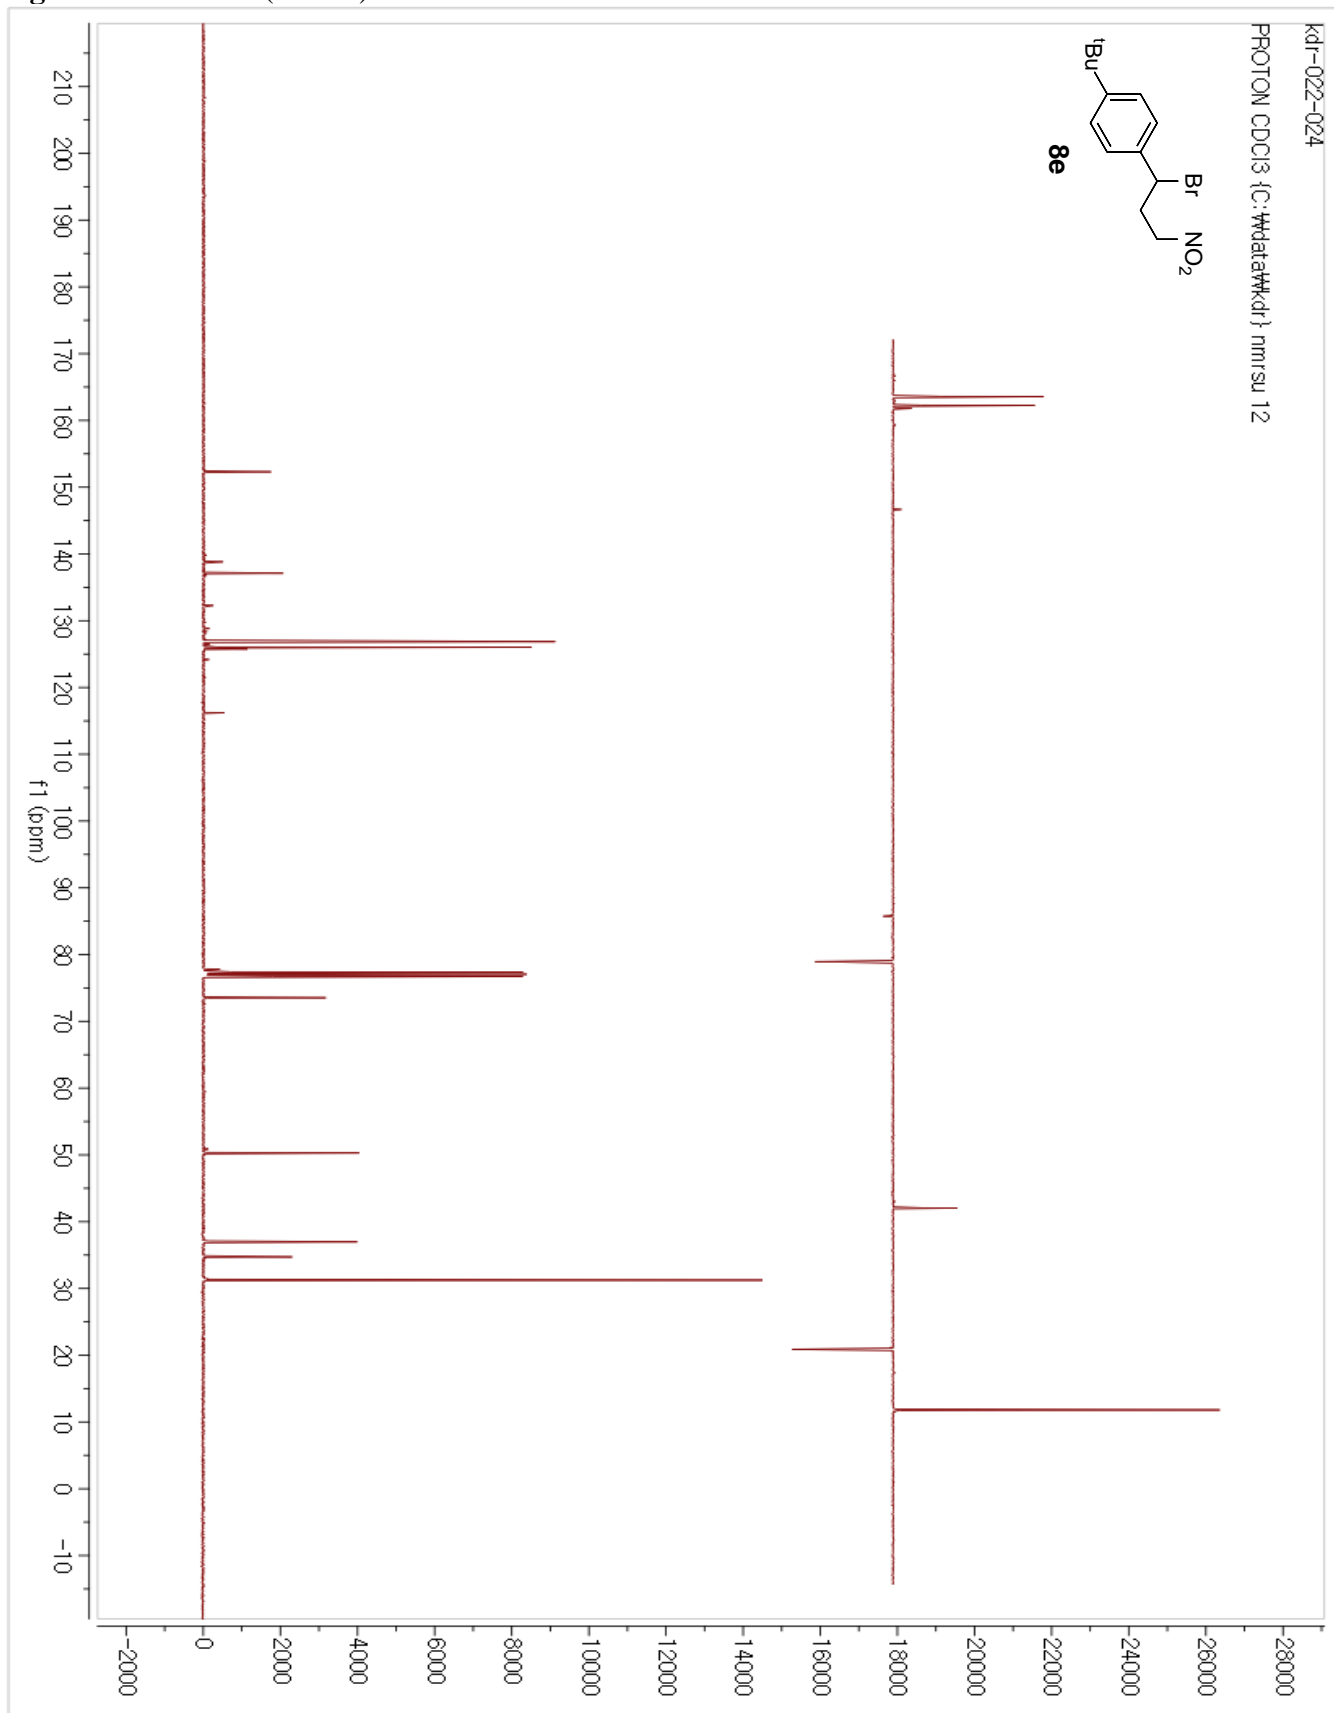



Figure 9.  $^1\text{H}$  NMR ( $\text{CDCl}_3$ ) of **8f**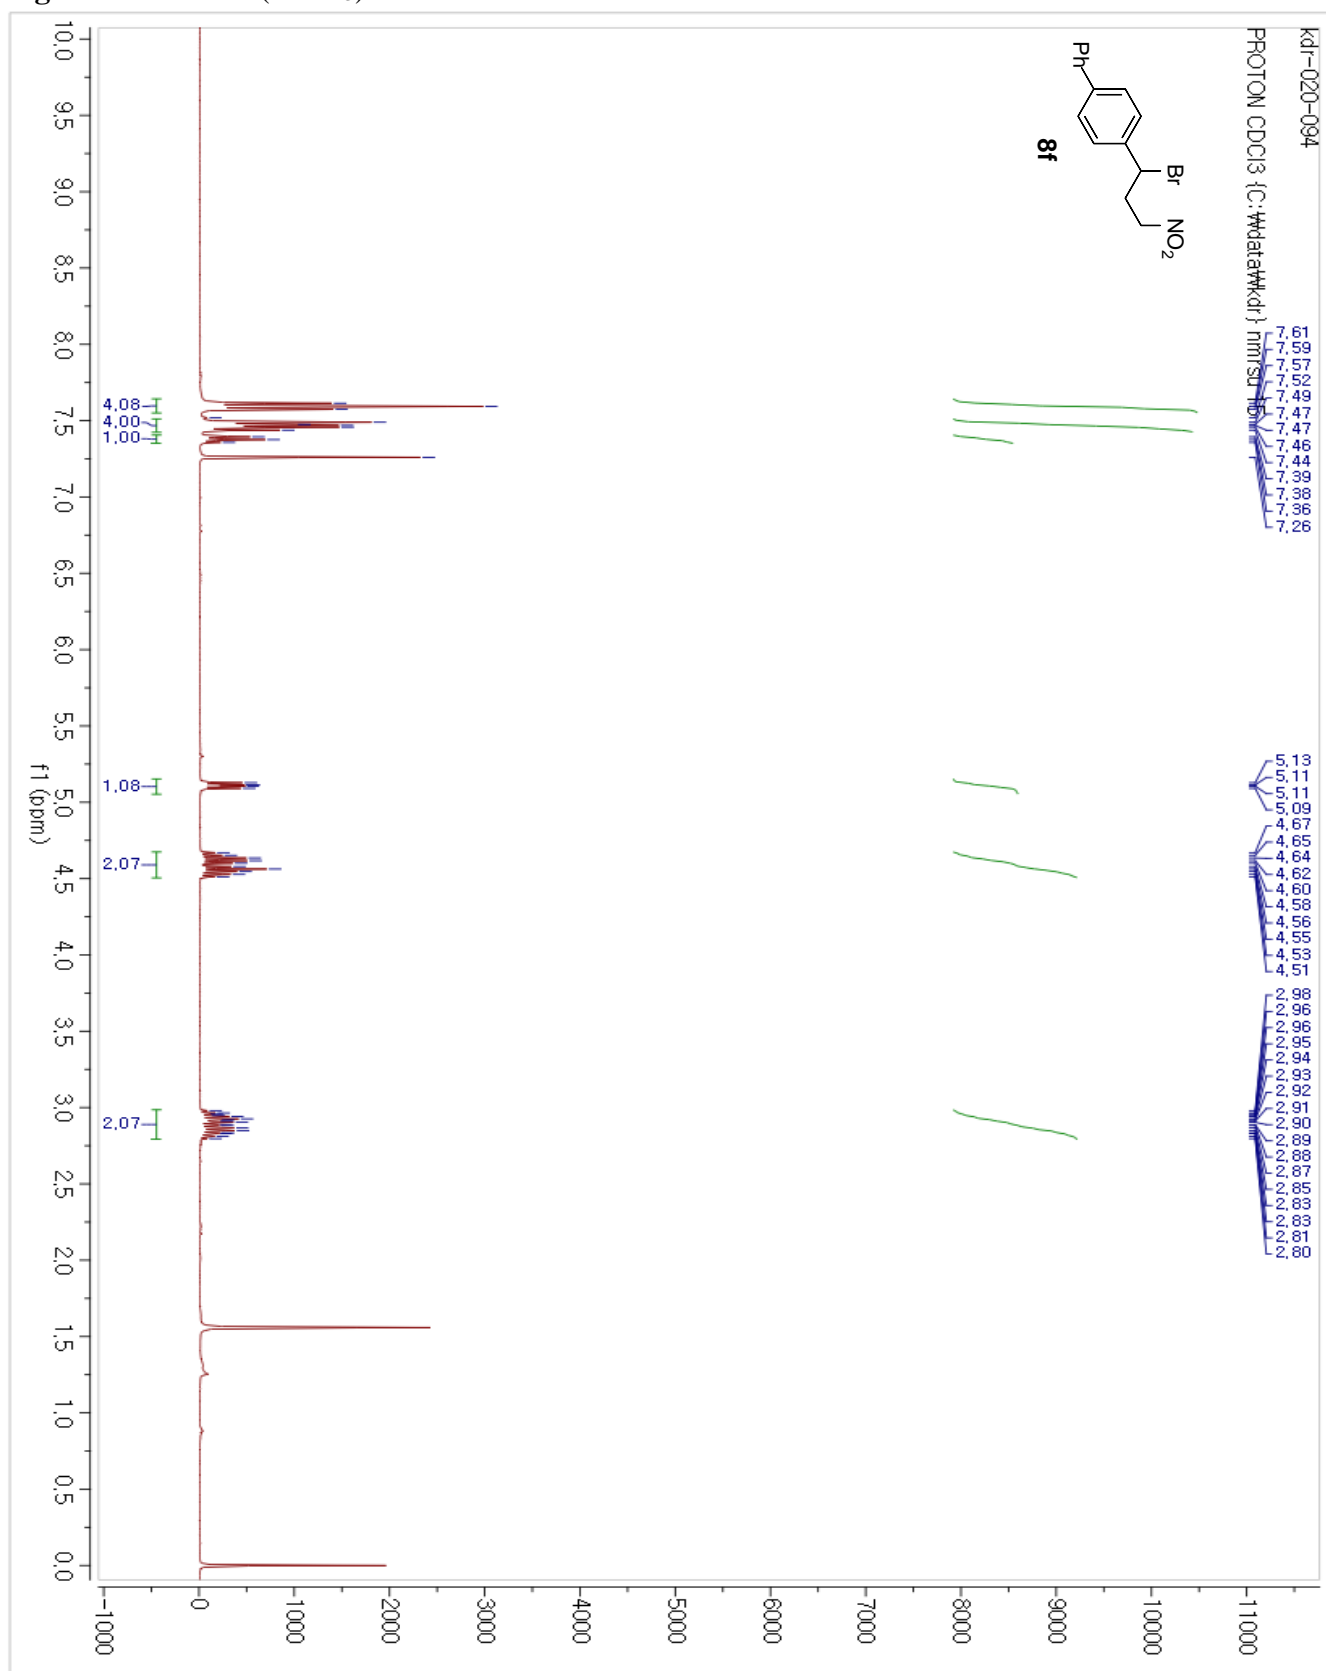

**Figure 10.**  $^{13}\text{C}$  NMR ( $\text{CDCl}_3$ ) of **8f**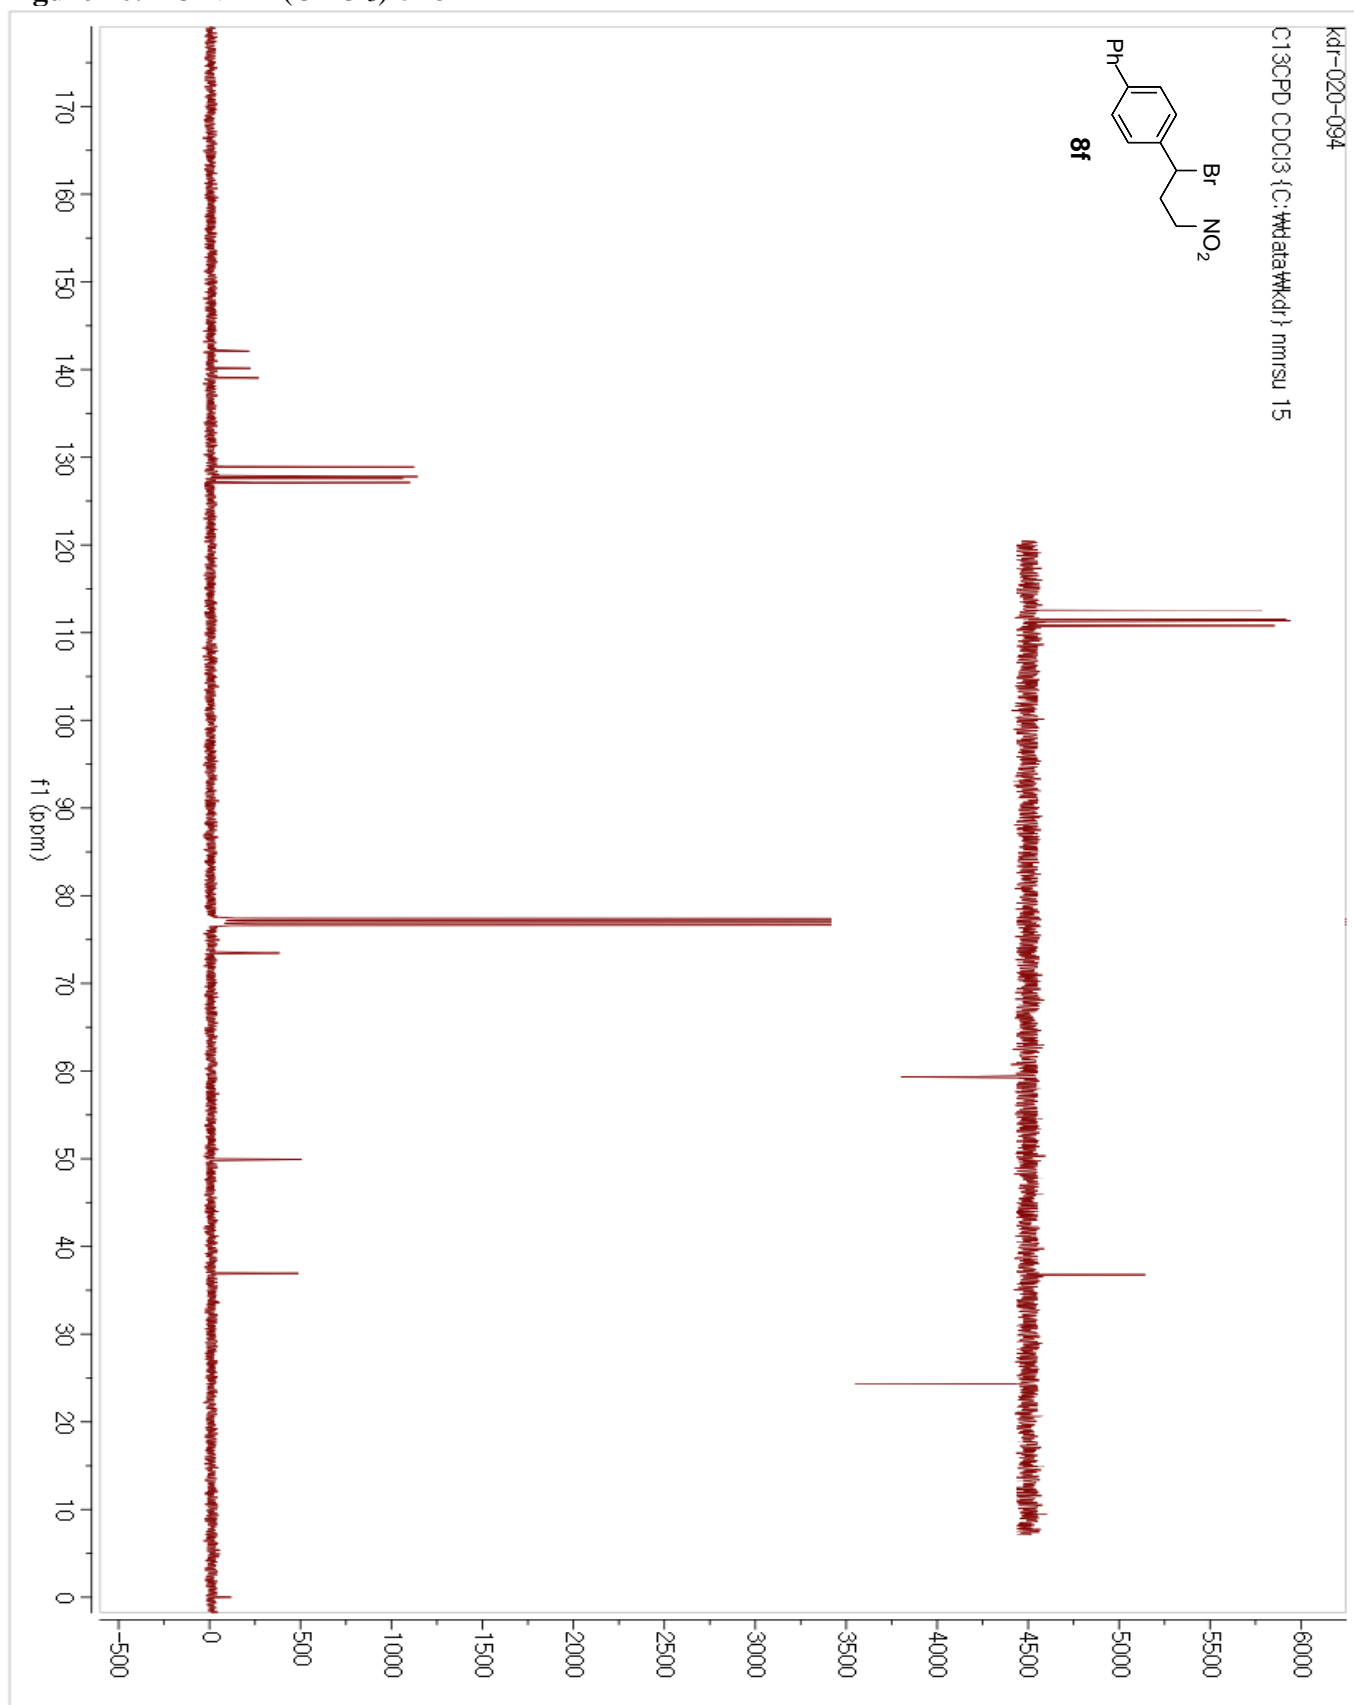

Figure 11.  $^1\text{H}$  NMR ( $\text{CDCl}_3$ ) of **8g**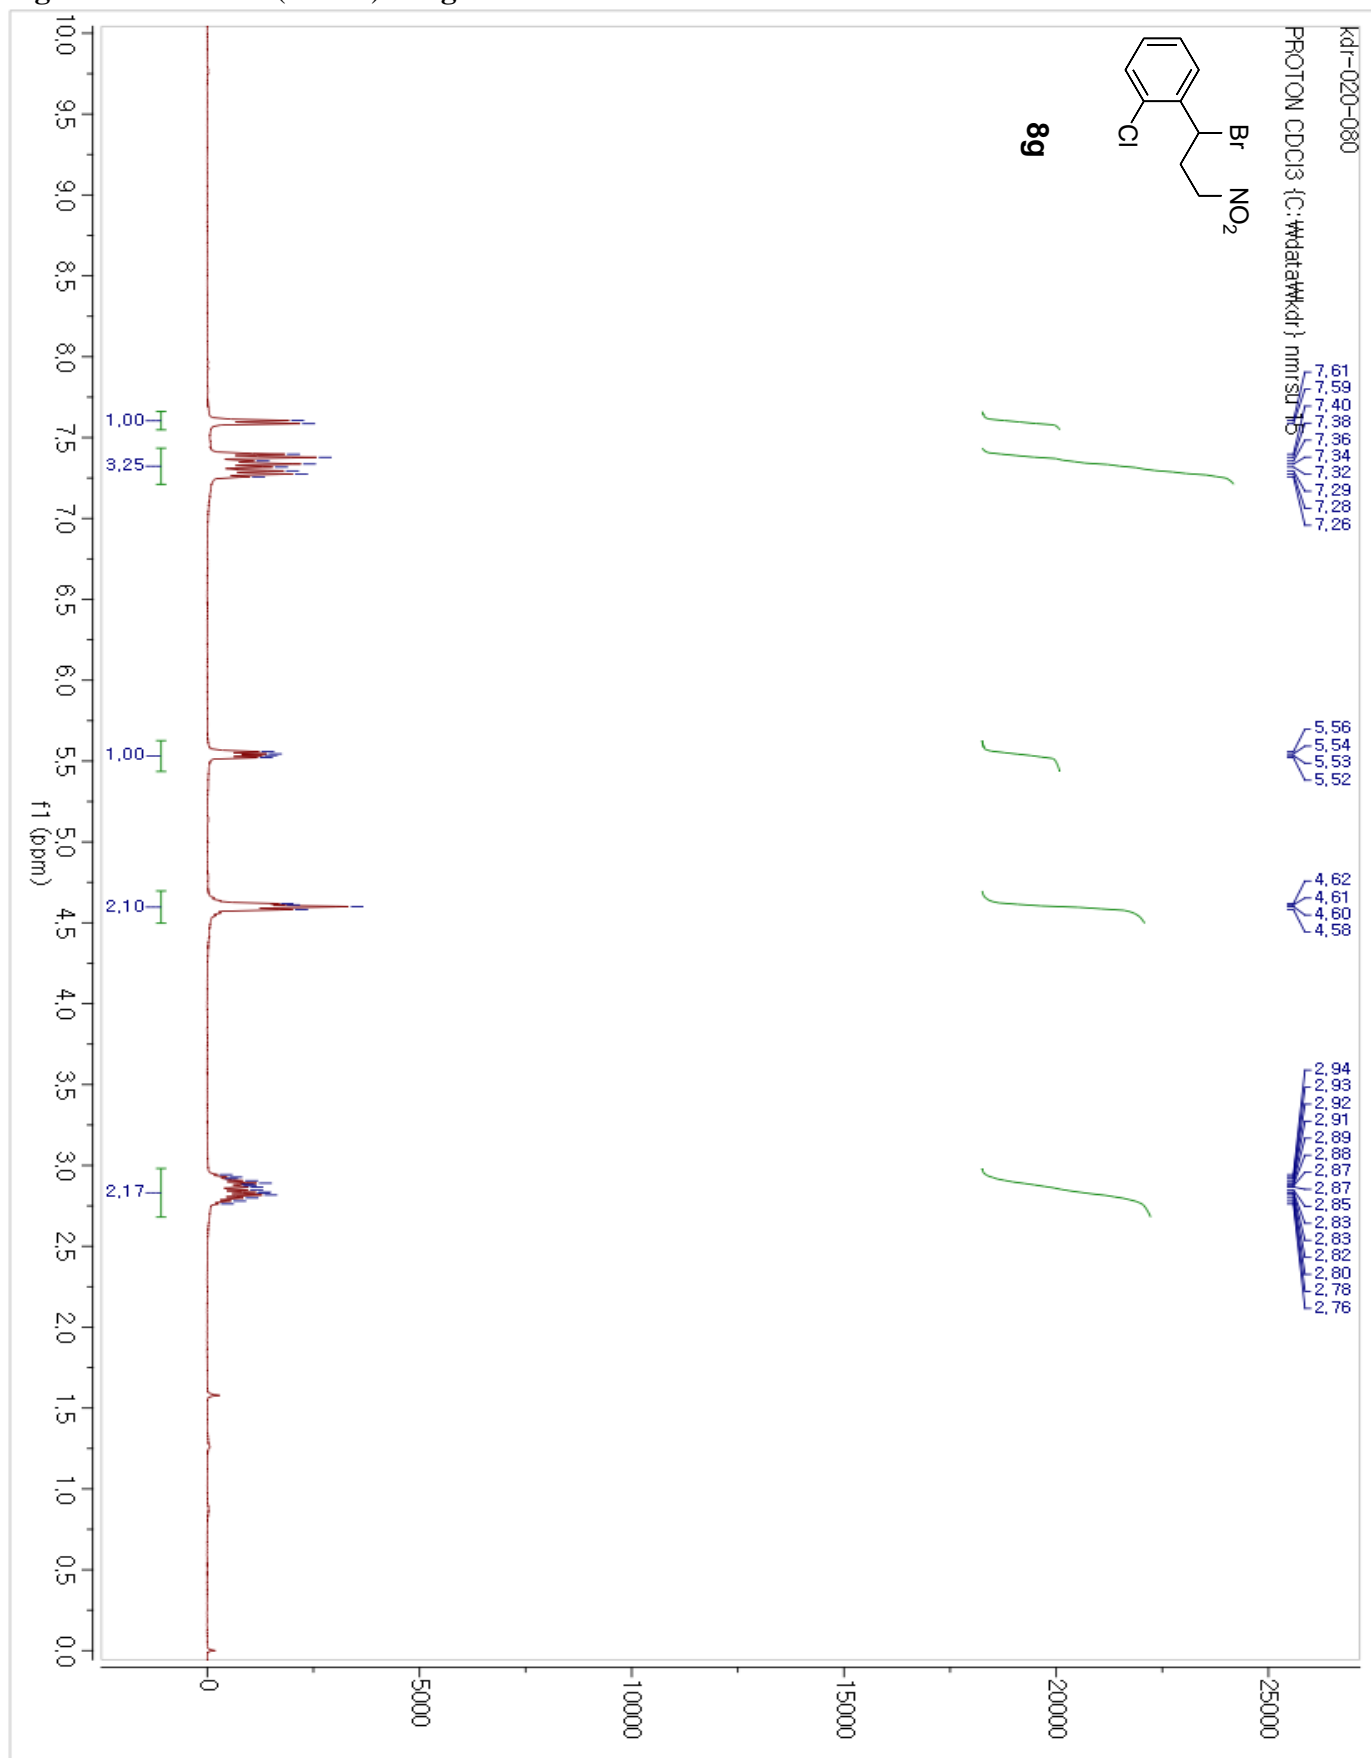

Figure 12.  $^{13}\text{C}$  NMR ( $\text{CDCl}_3$ ) of **8g**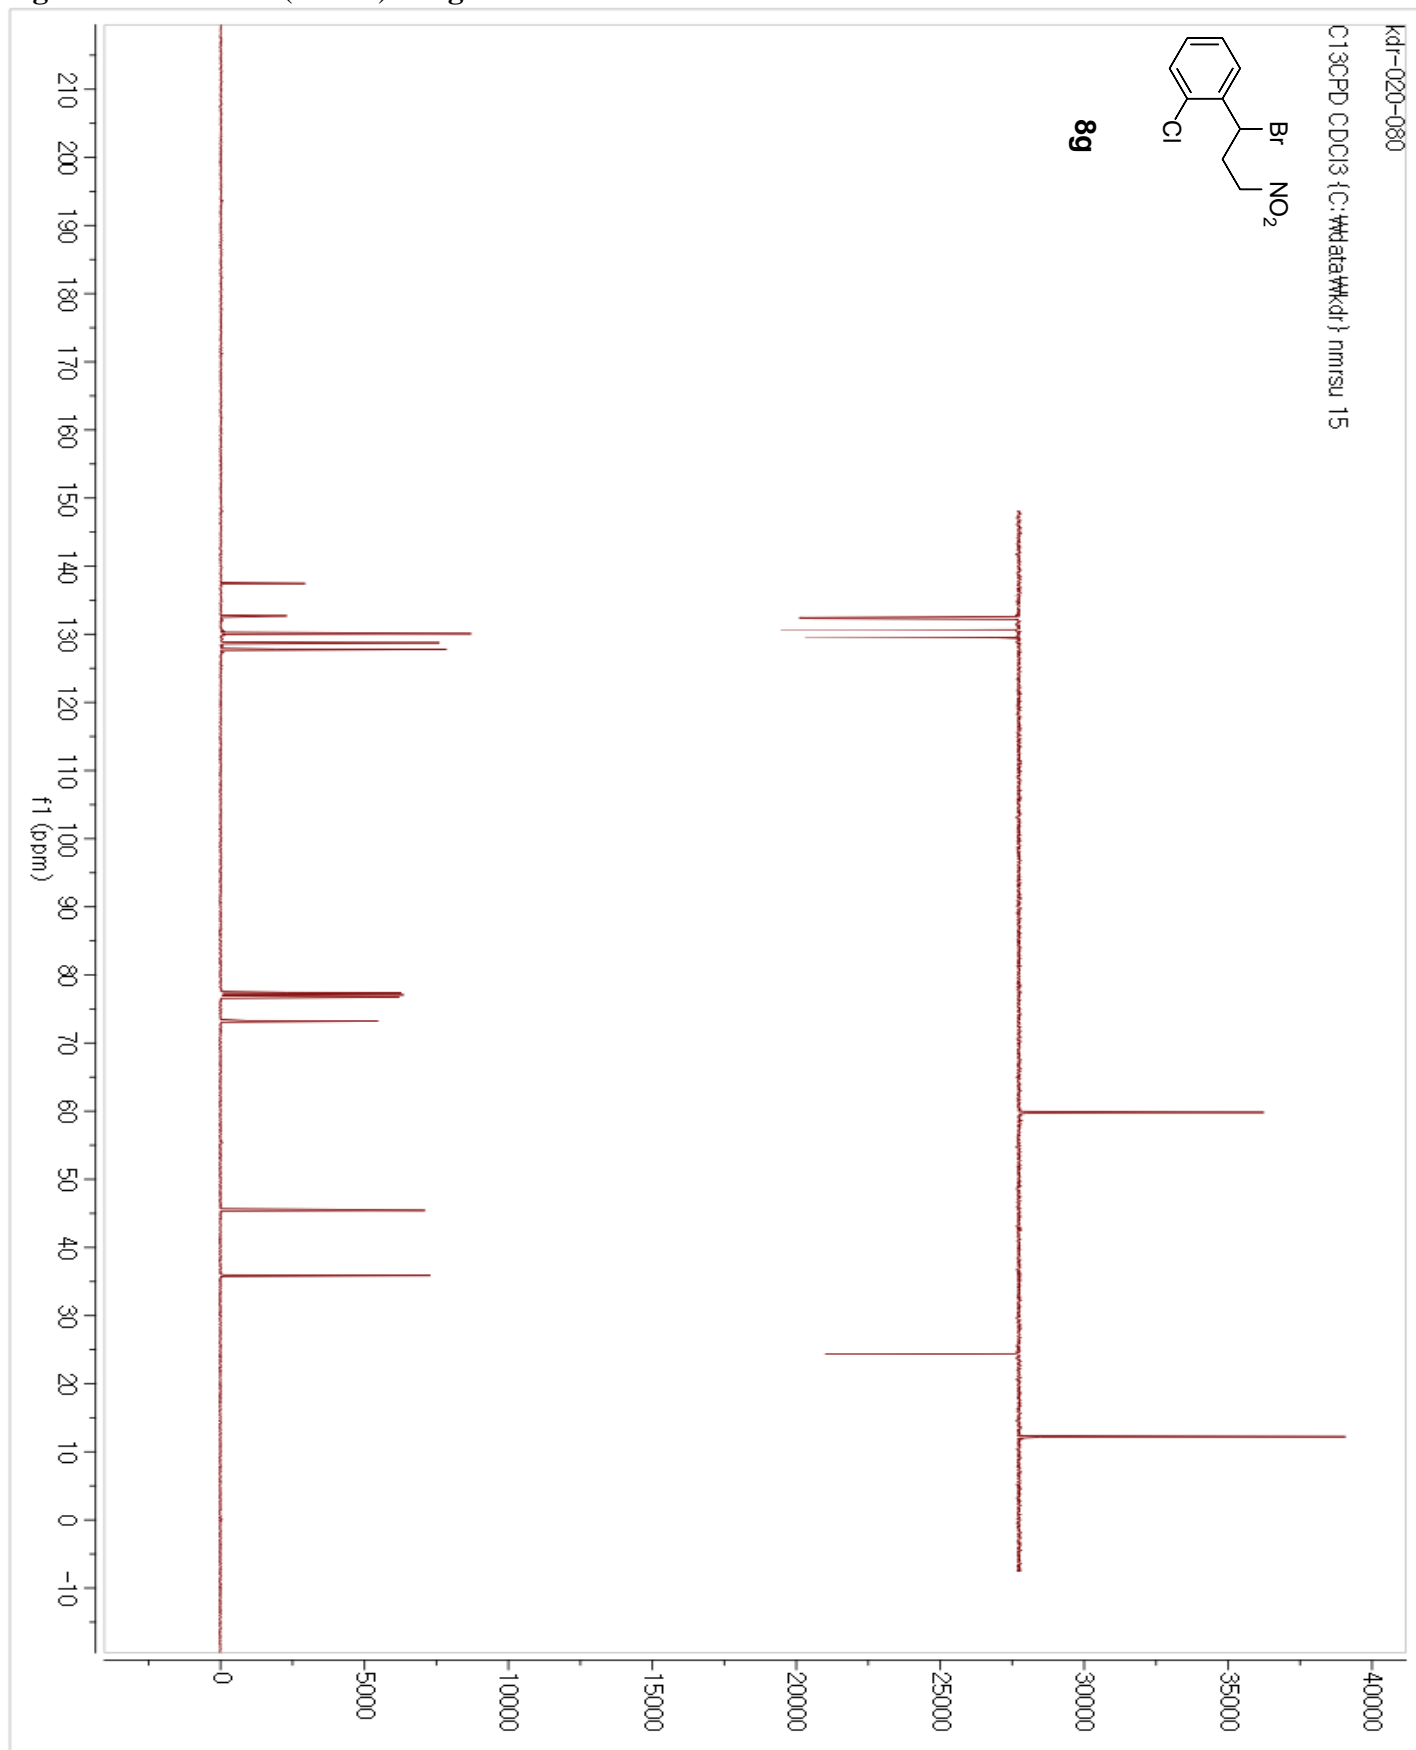

Figure 13.  $^1\text{H}$  NMR ( $\text{CDCl}_3$ ) of **8h**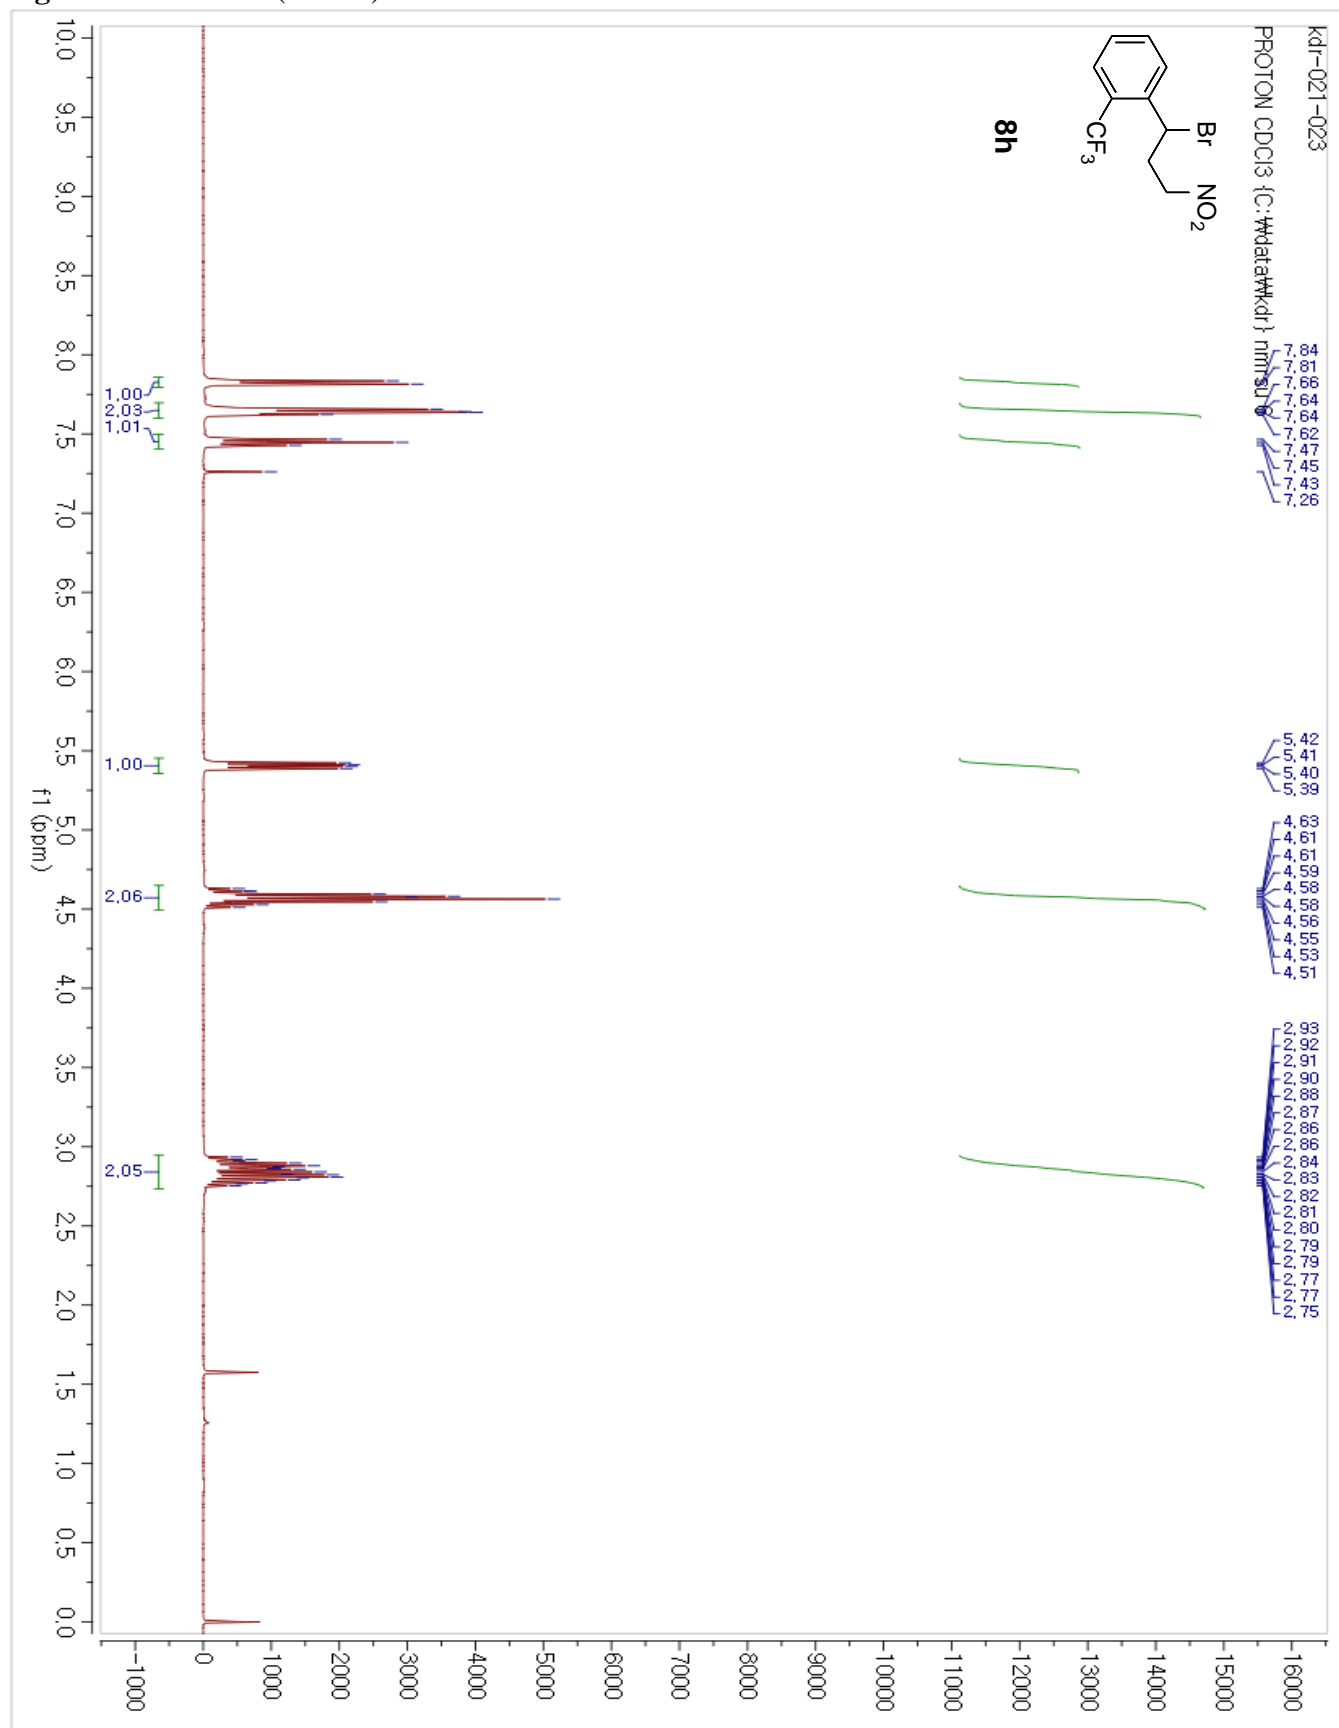

**Figure 14.**  $^{13}\text{C}$  NMR ( $\text{CDCl}_3$ ) of **8h**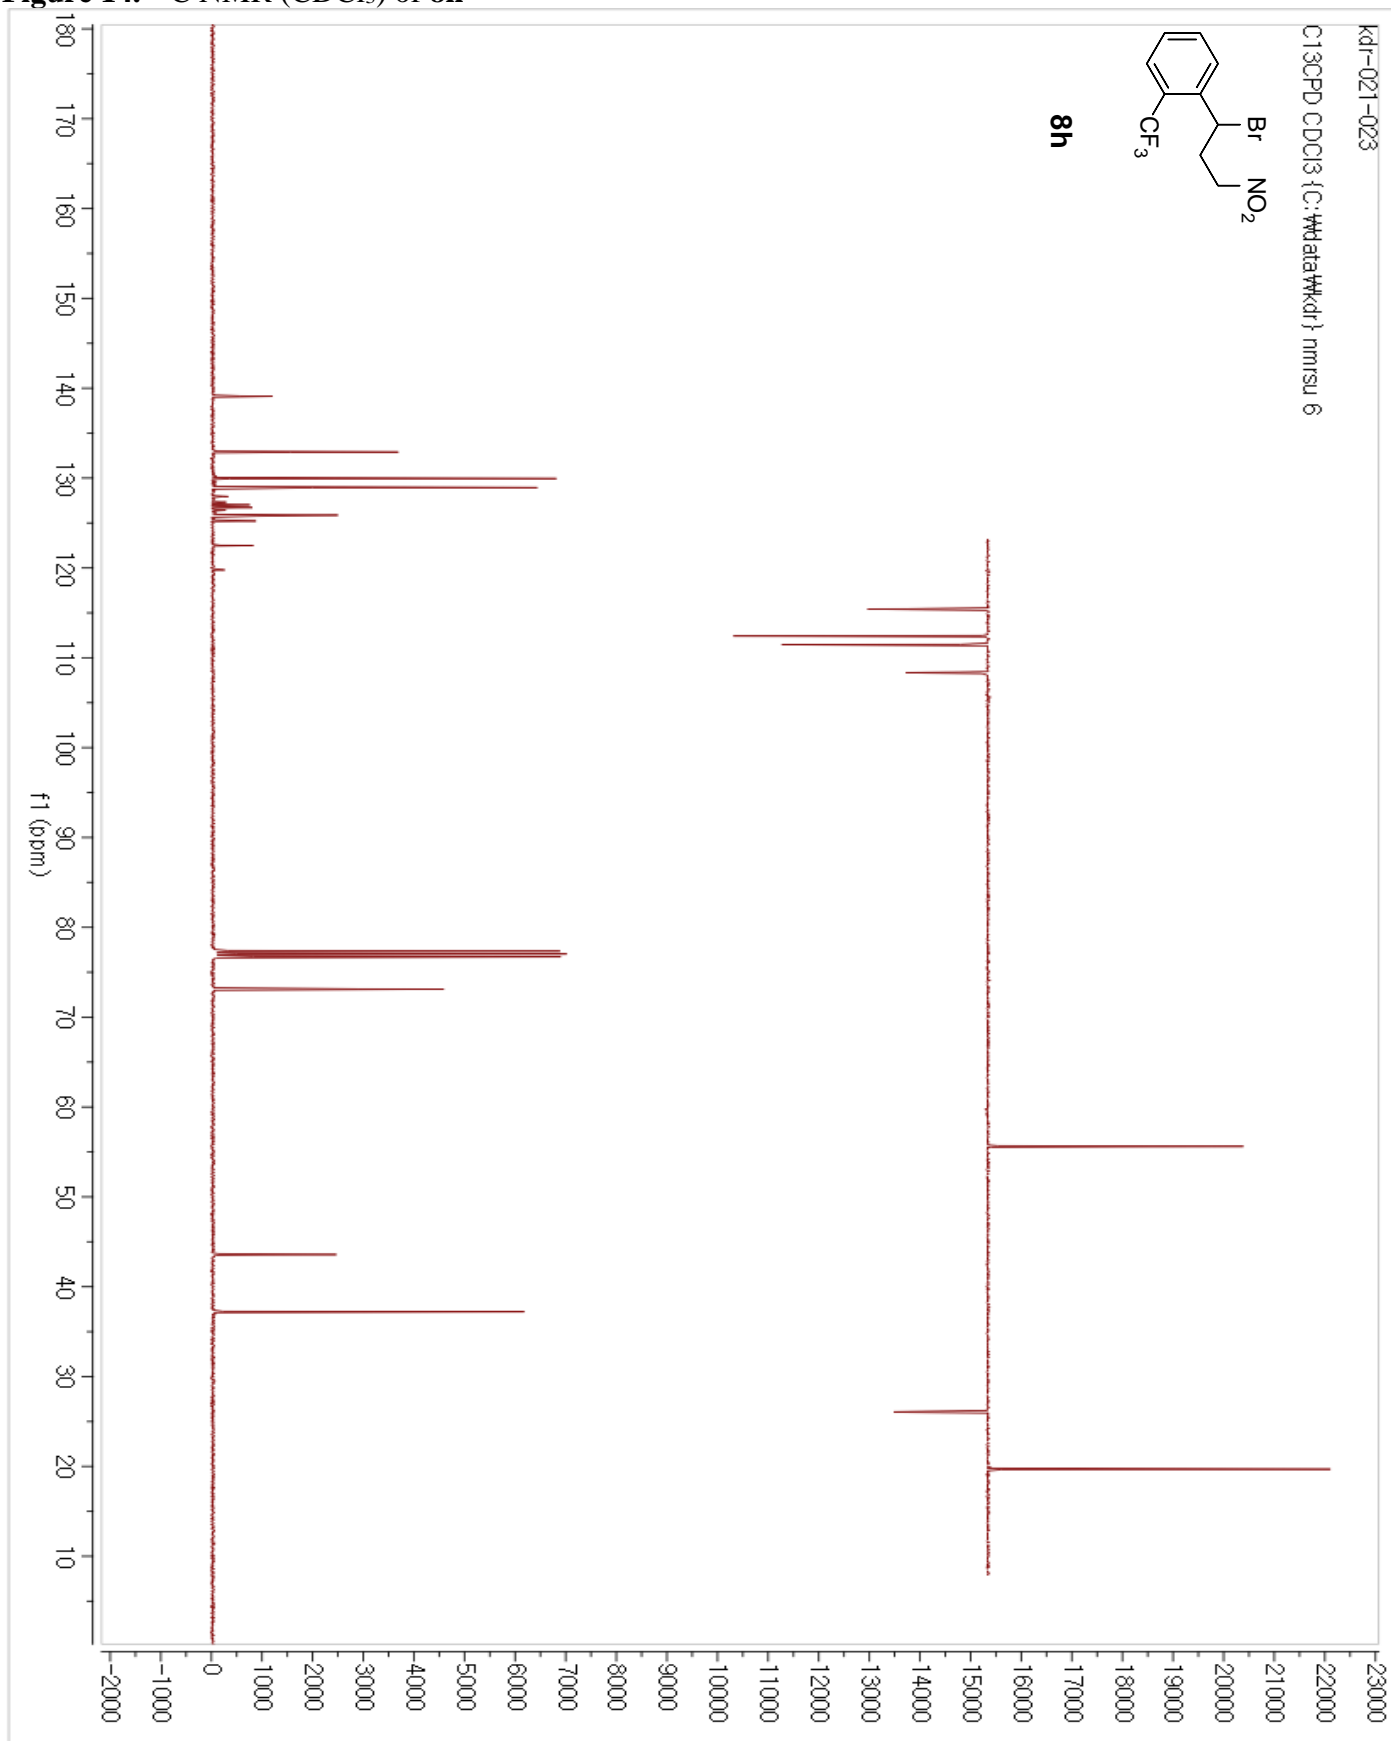

Figure 15.  $^{19}\text{F}$  NMR ( $\text{CDCl}_3$ ) of **8h**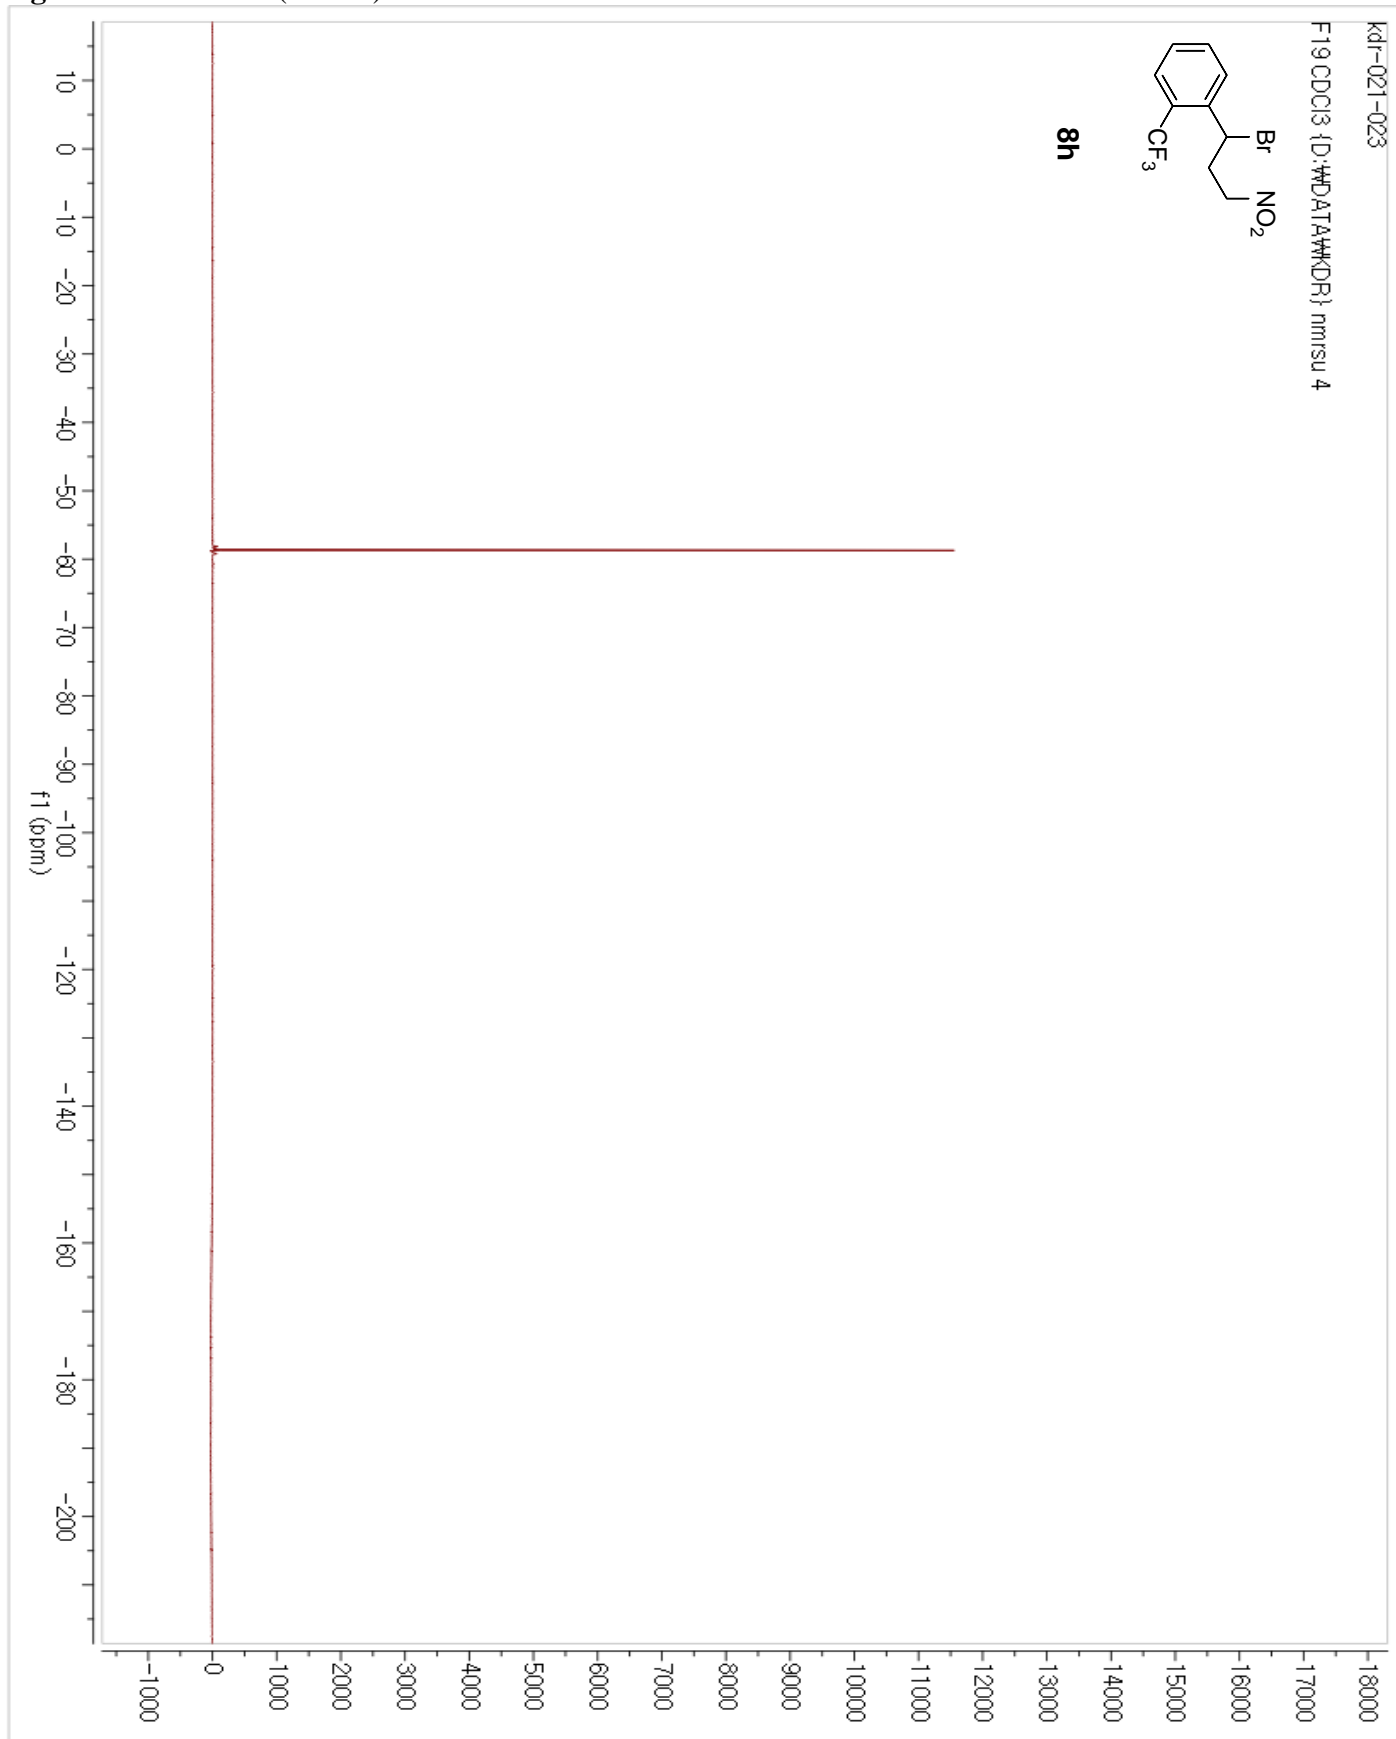

Figure 16.  $^1\text{H}$  NMR ( $\text{CDCl}_3$ ) of **8i**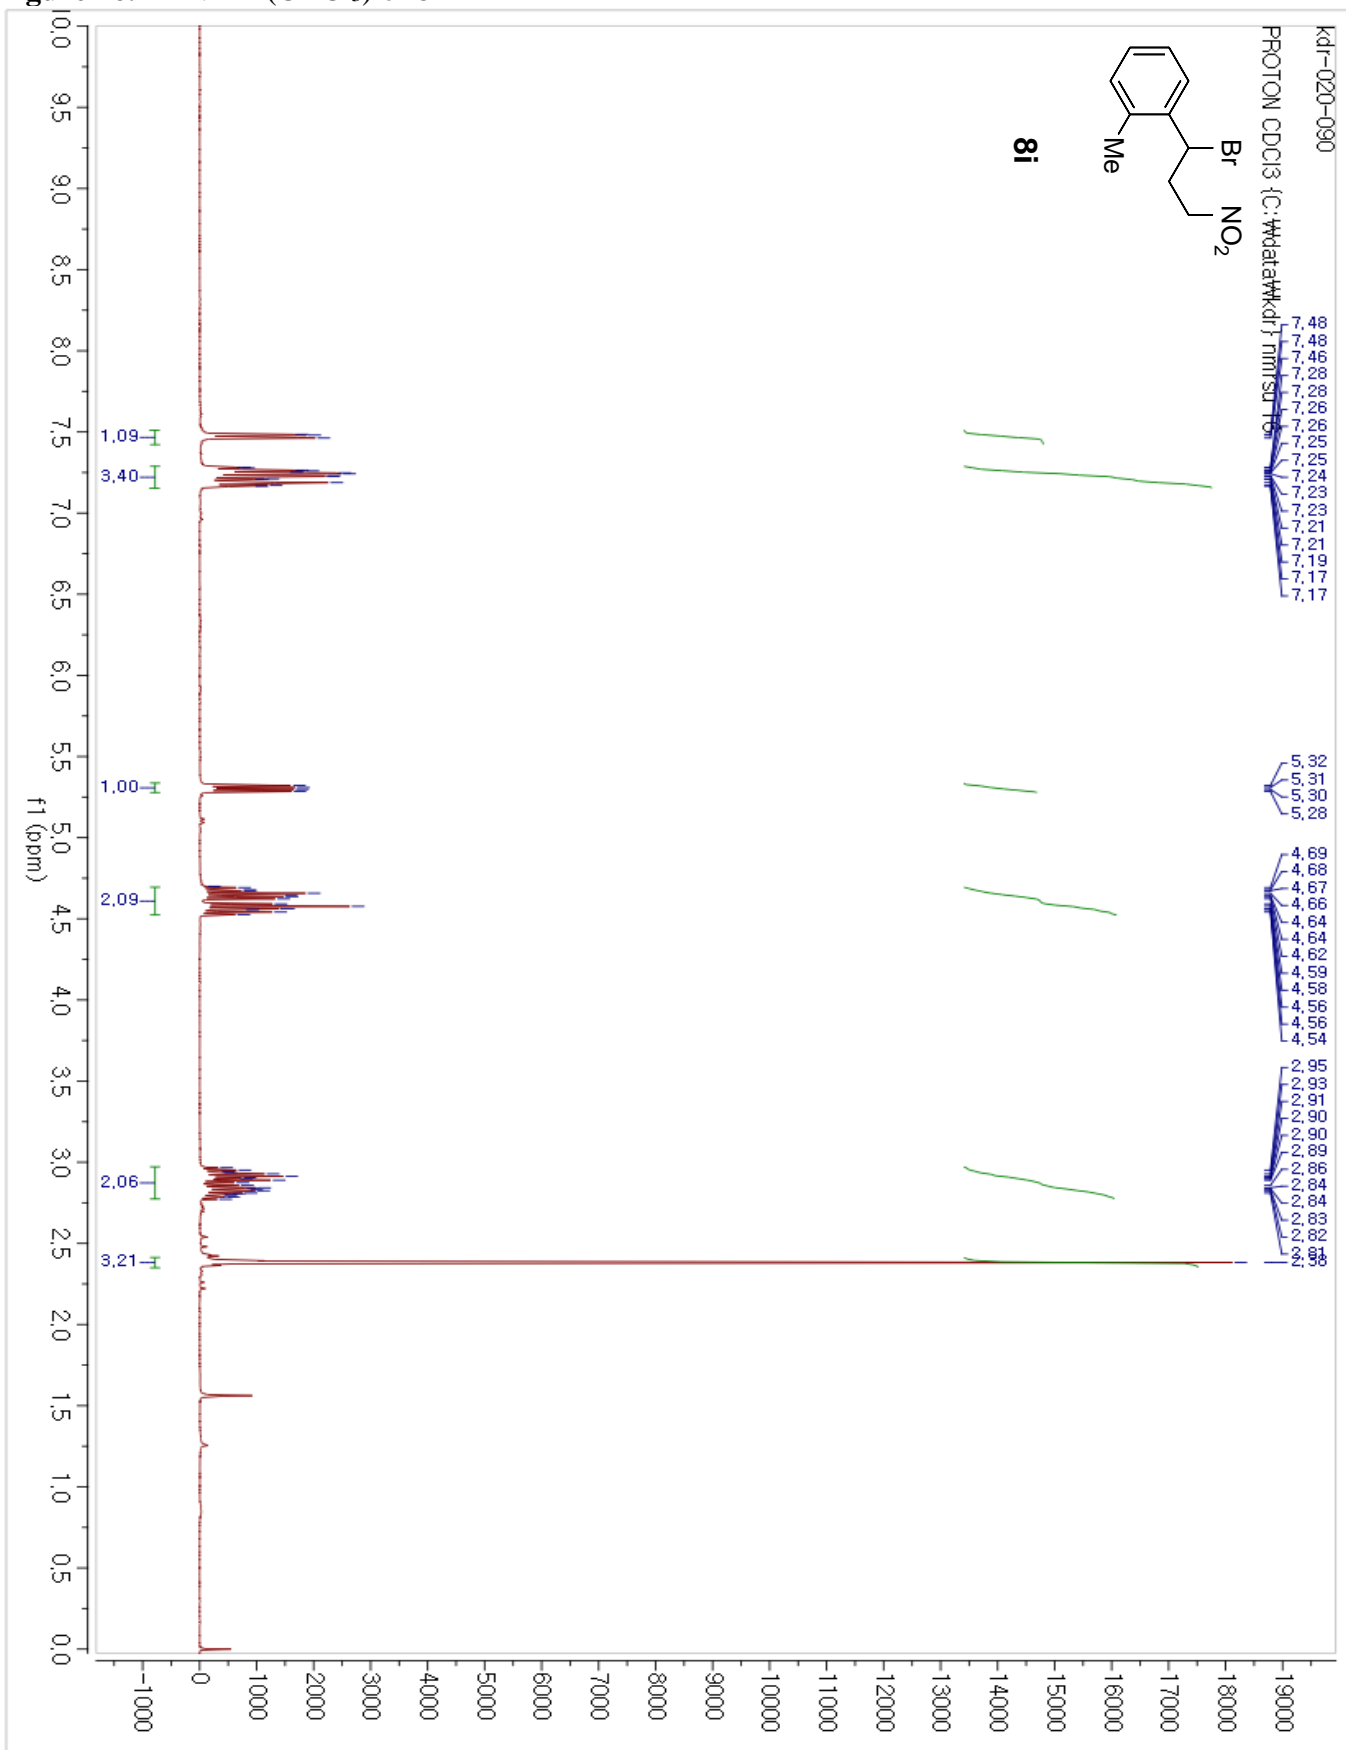



Figure 17.  $^{13}\text{C}$  NMR ( $\text{CDCl}_3$ ) of **8i**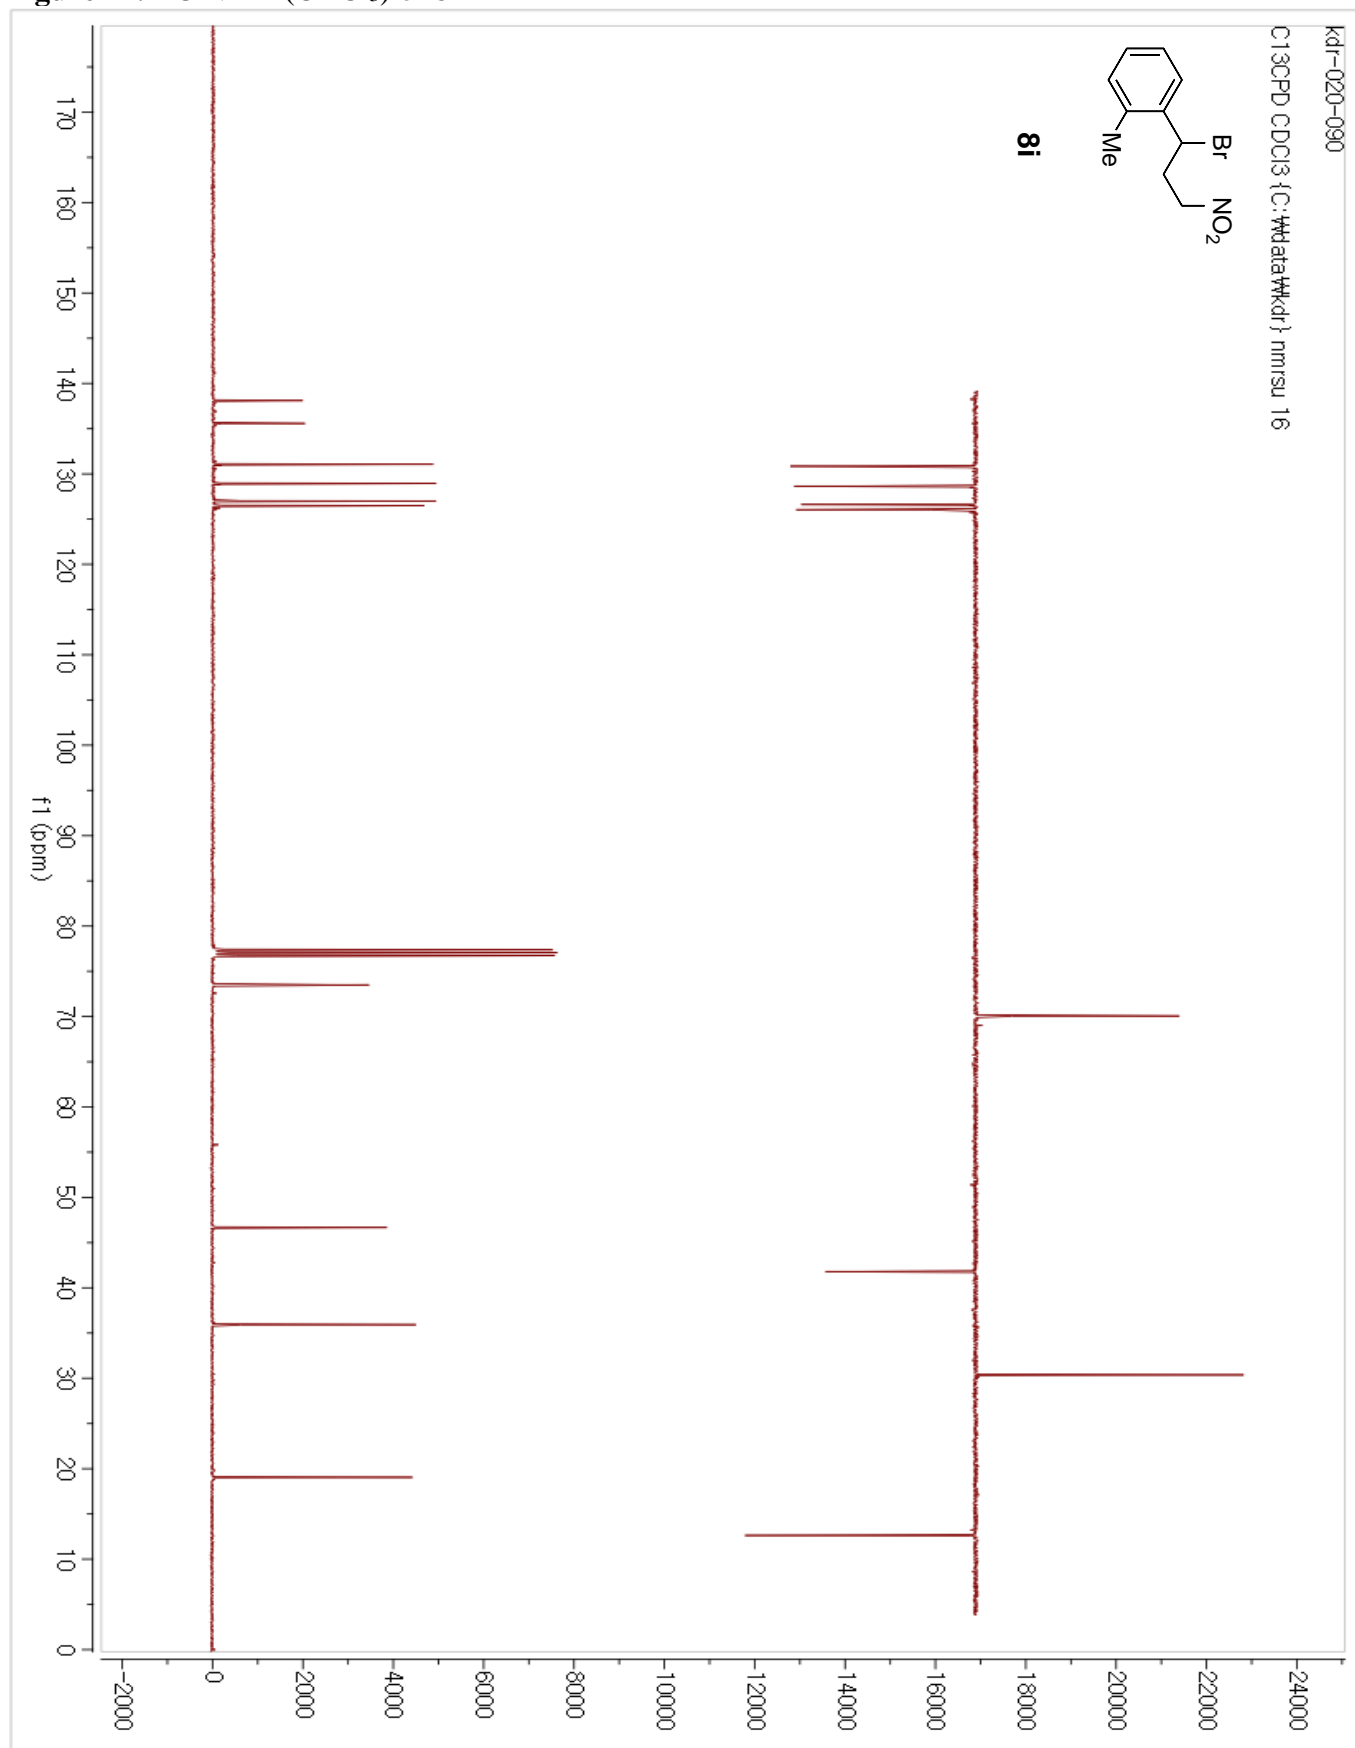

**Figure 18.**  $^1\text{H}$  NMR ( $\text{CDCl}_3$ ) of **8j**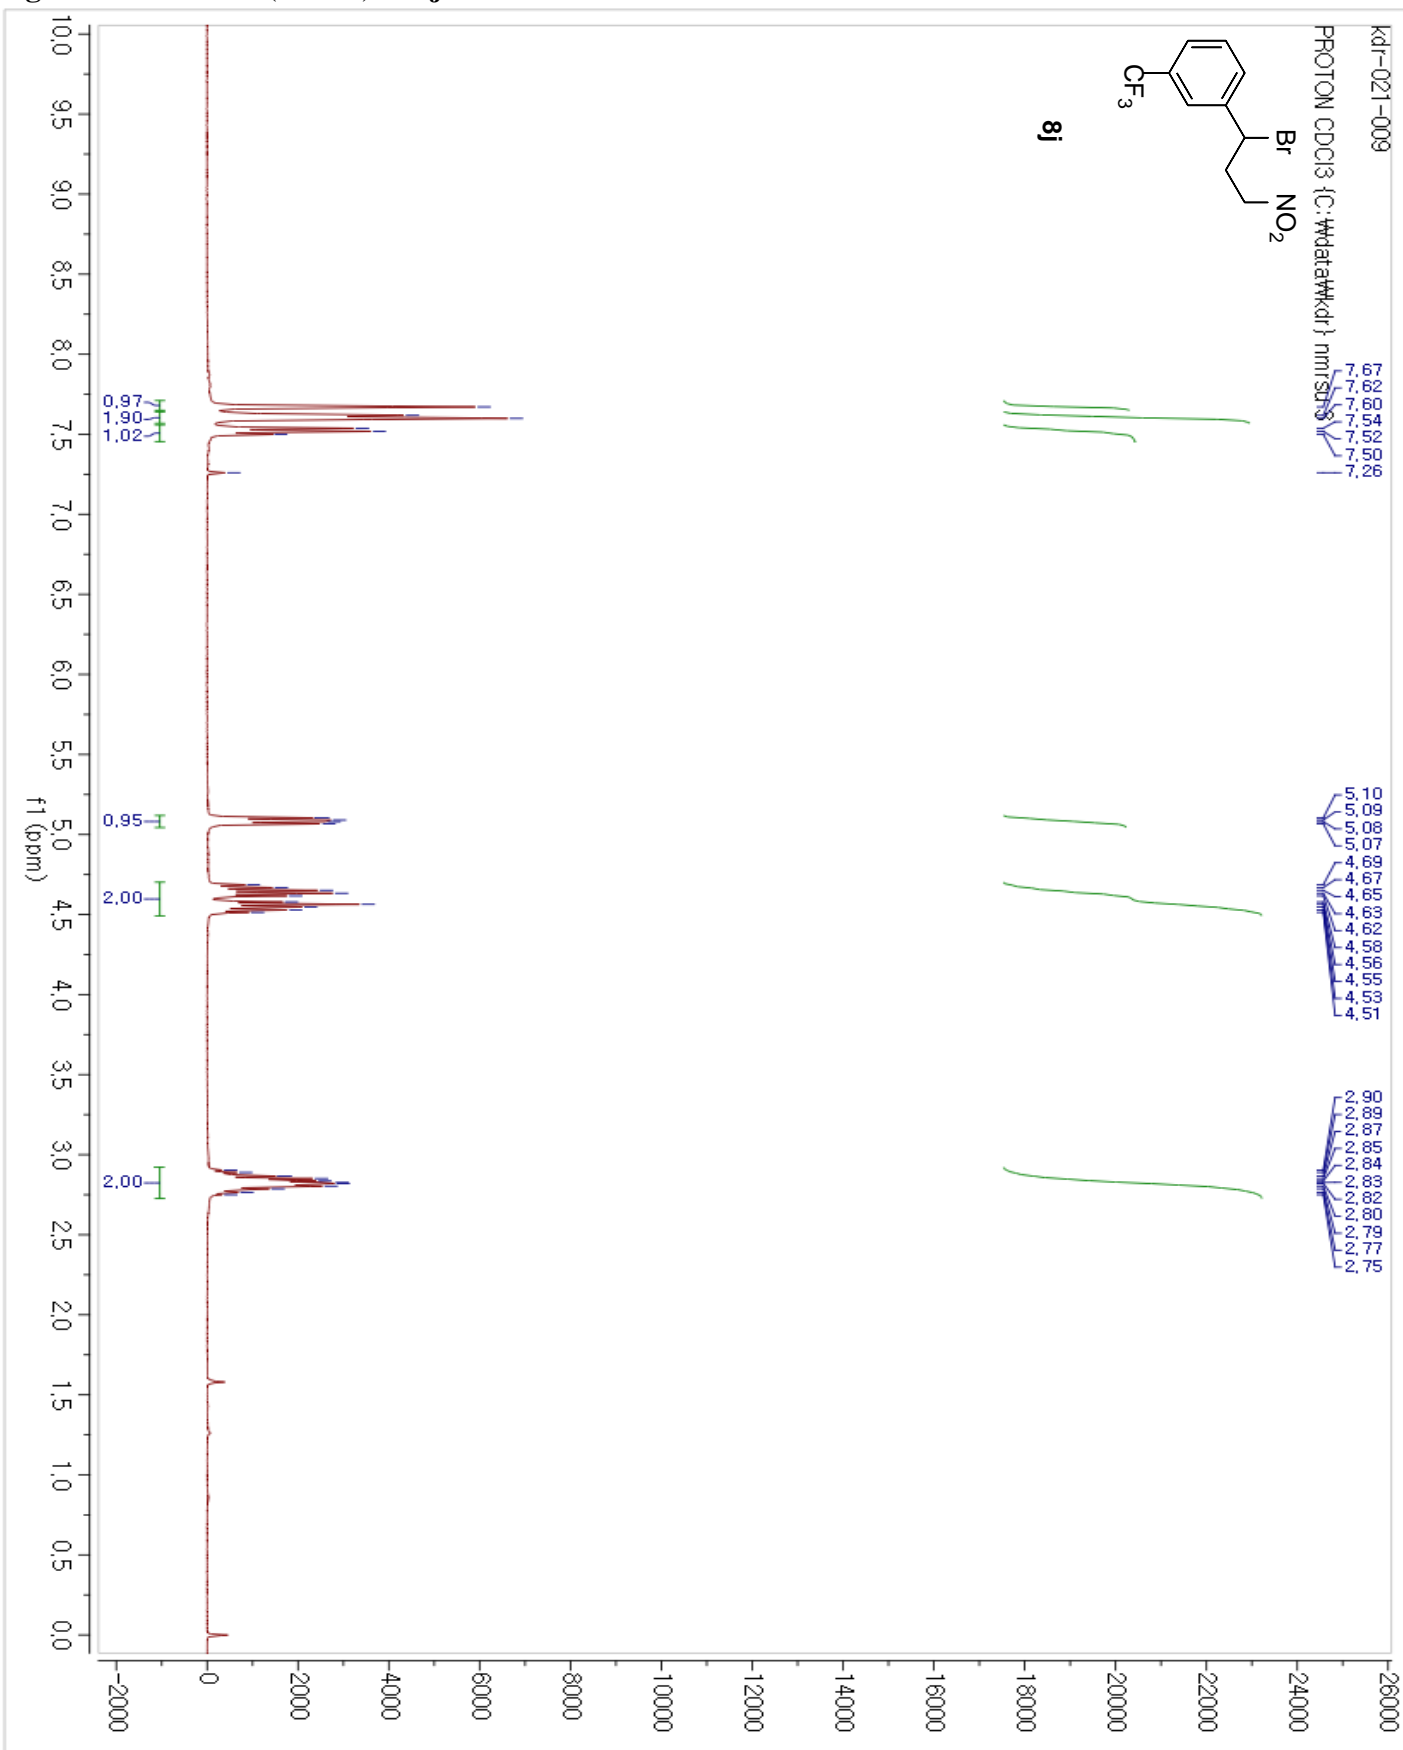



Figure 20.  $^{19}\text{F}$  NMR ( $\text{CDCl}_3$ ) of **8j**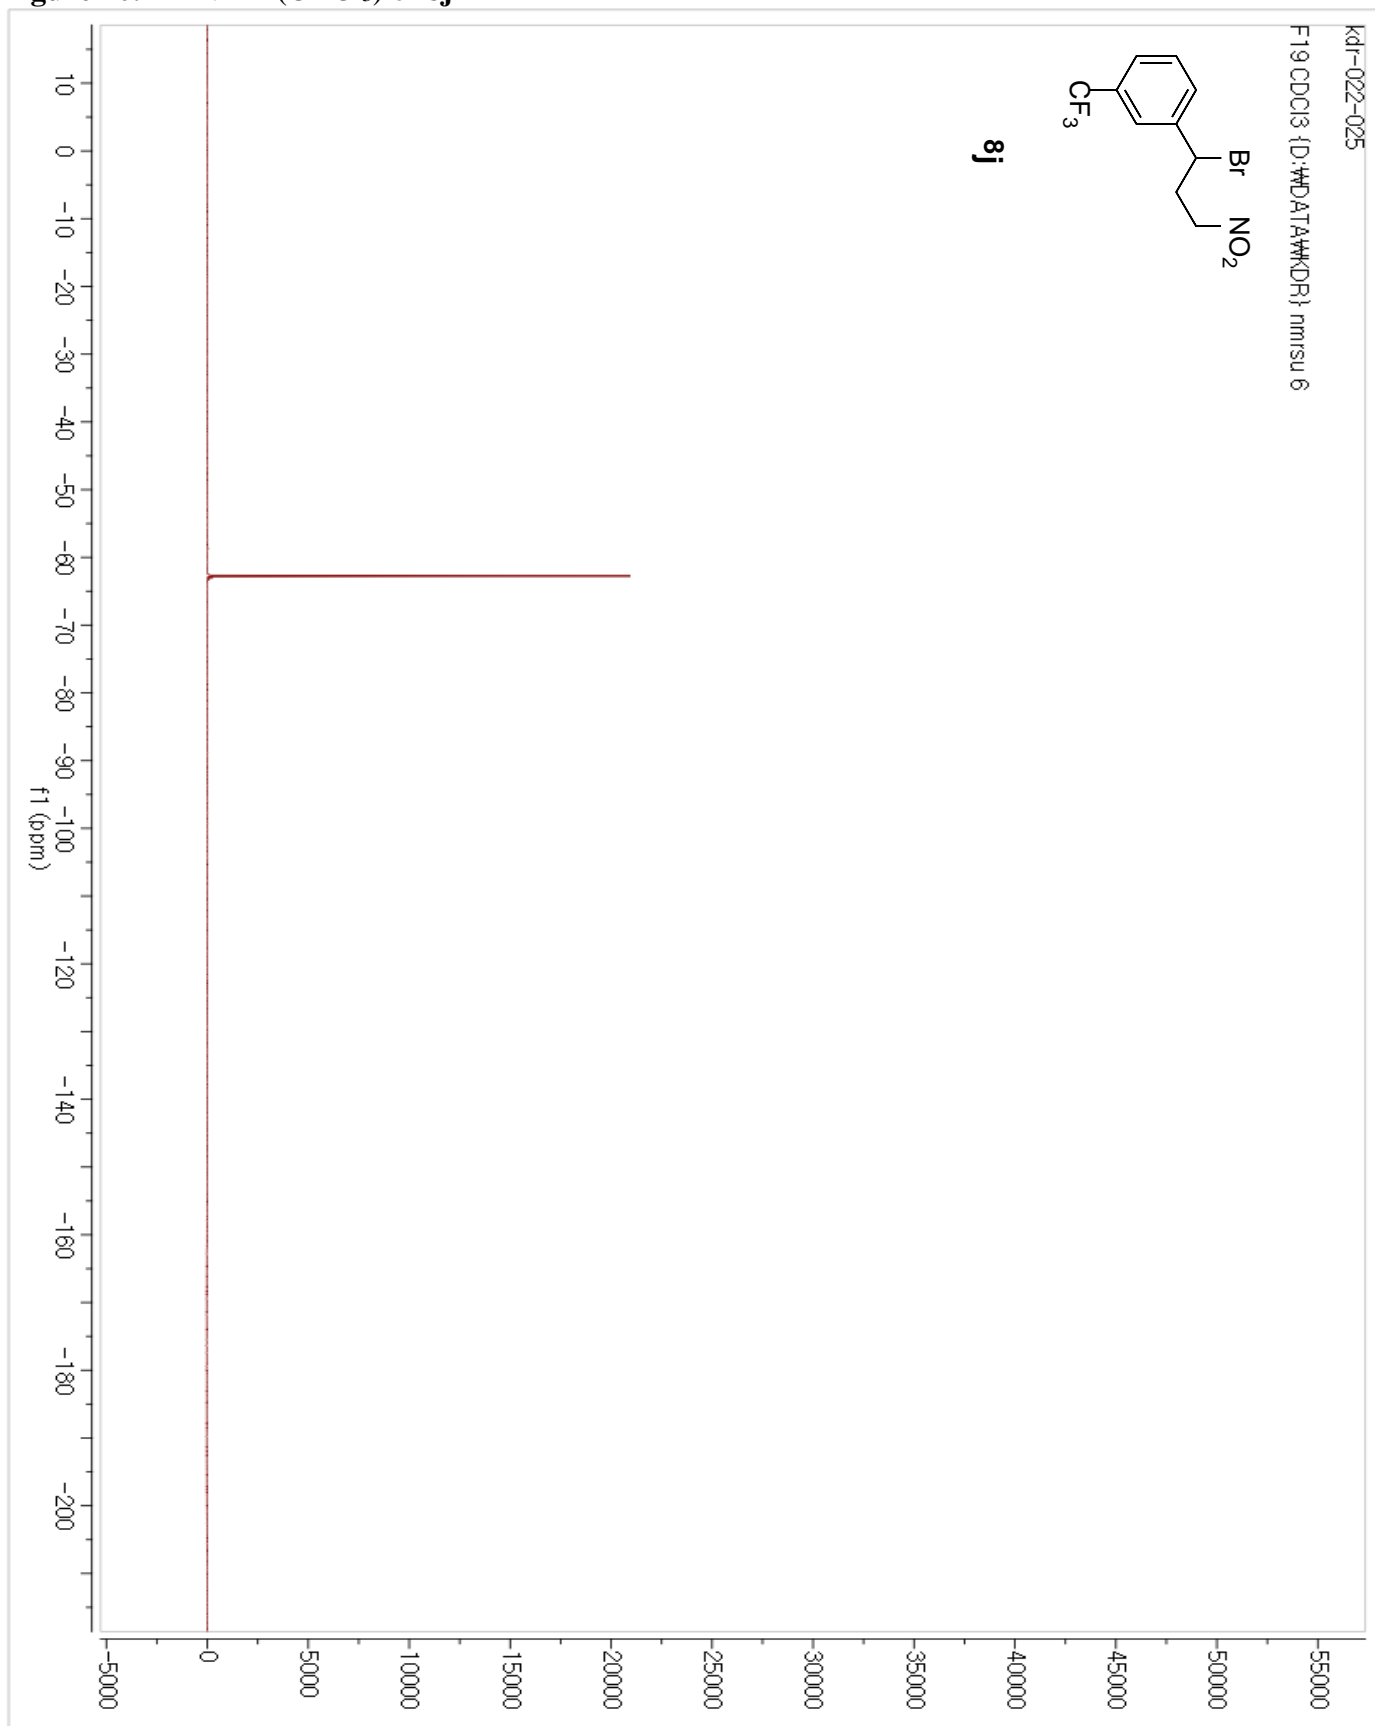

Figure 21.  $^1\text{H}$  NMR ( $\text{CDCl}_3$ ) of **8k**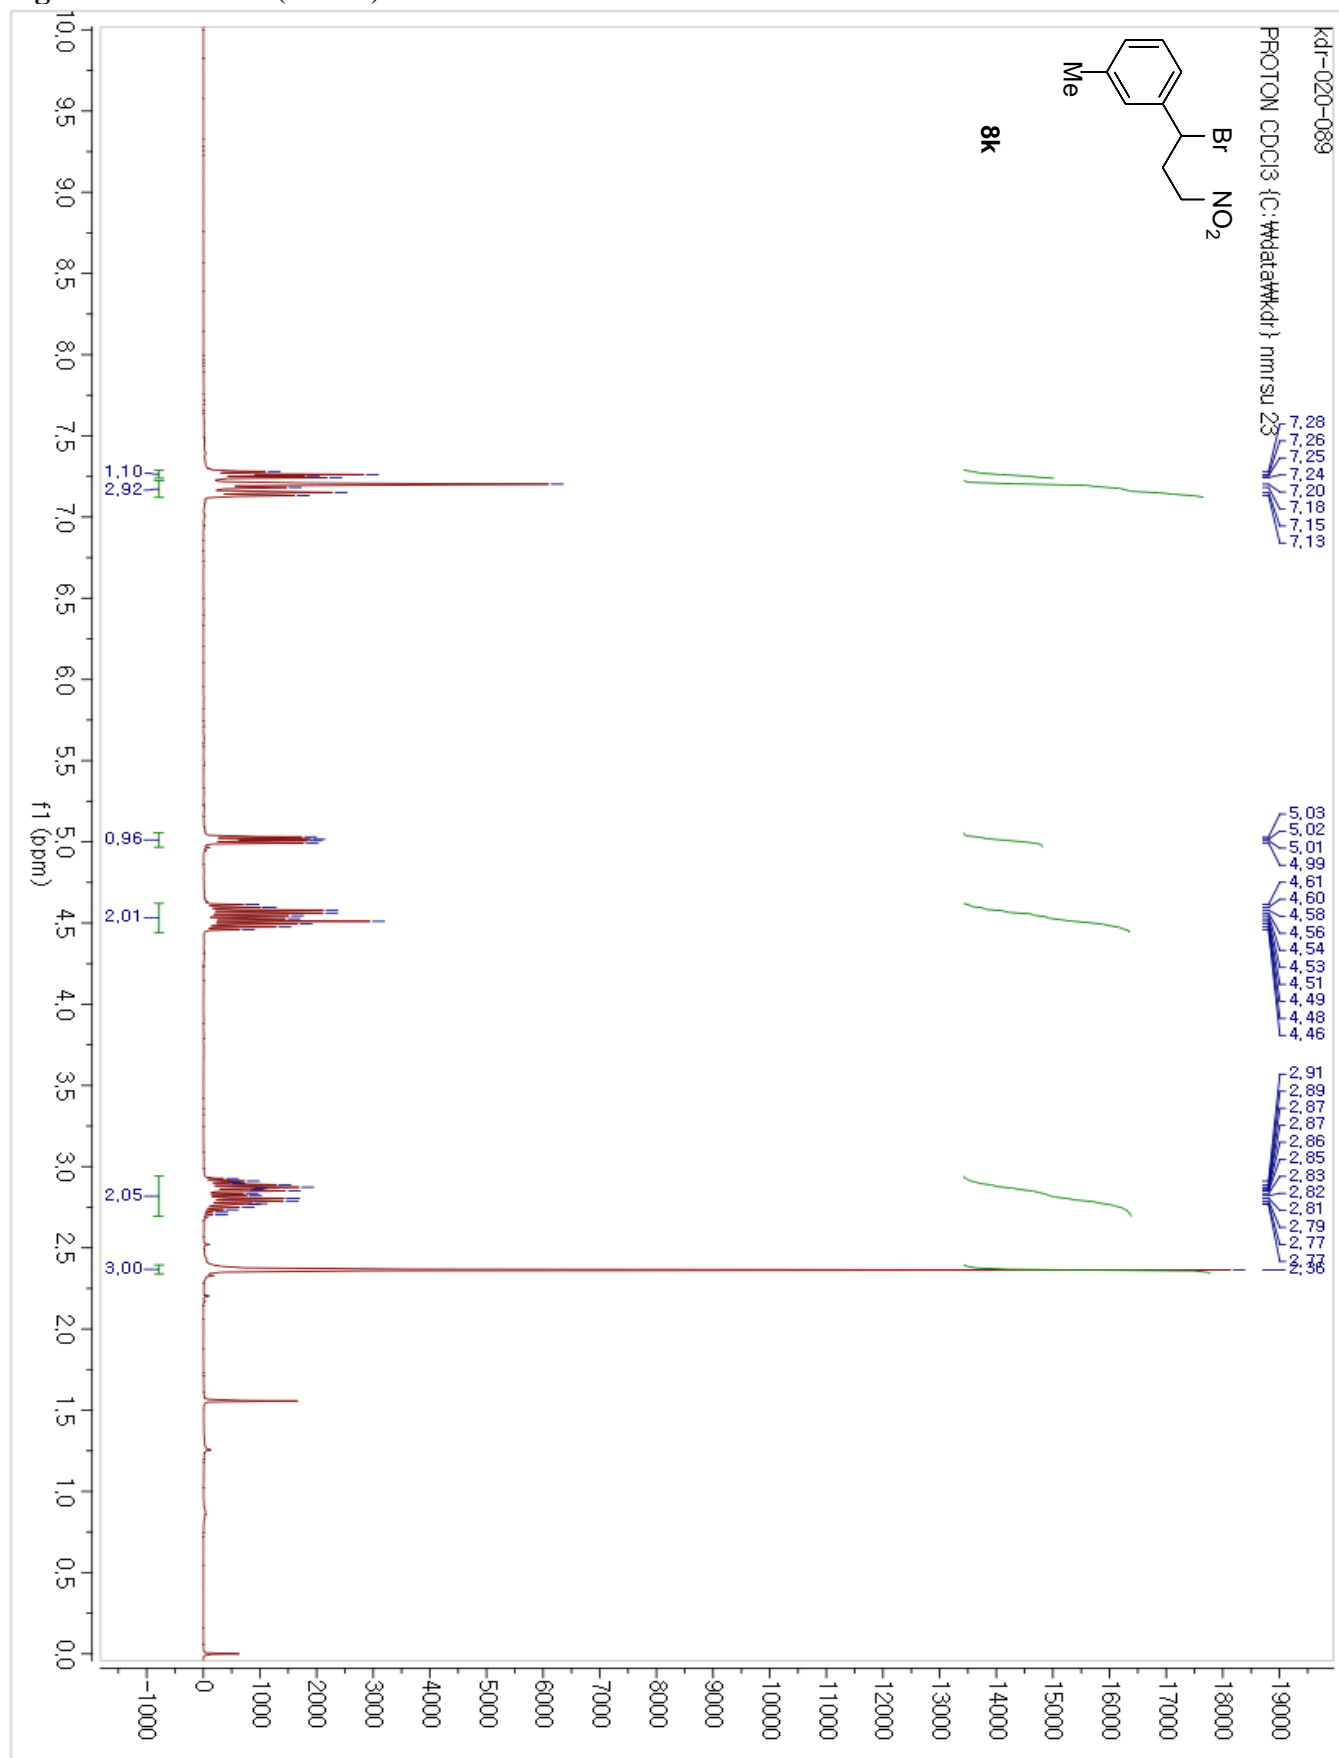

**Figure 22.**  $^{13}\text{C}$  NMR ( $\text{CDCl}_3$ ) of **8k**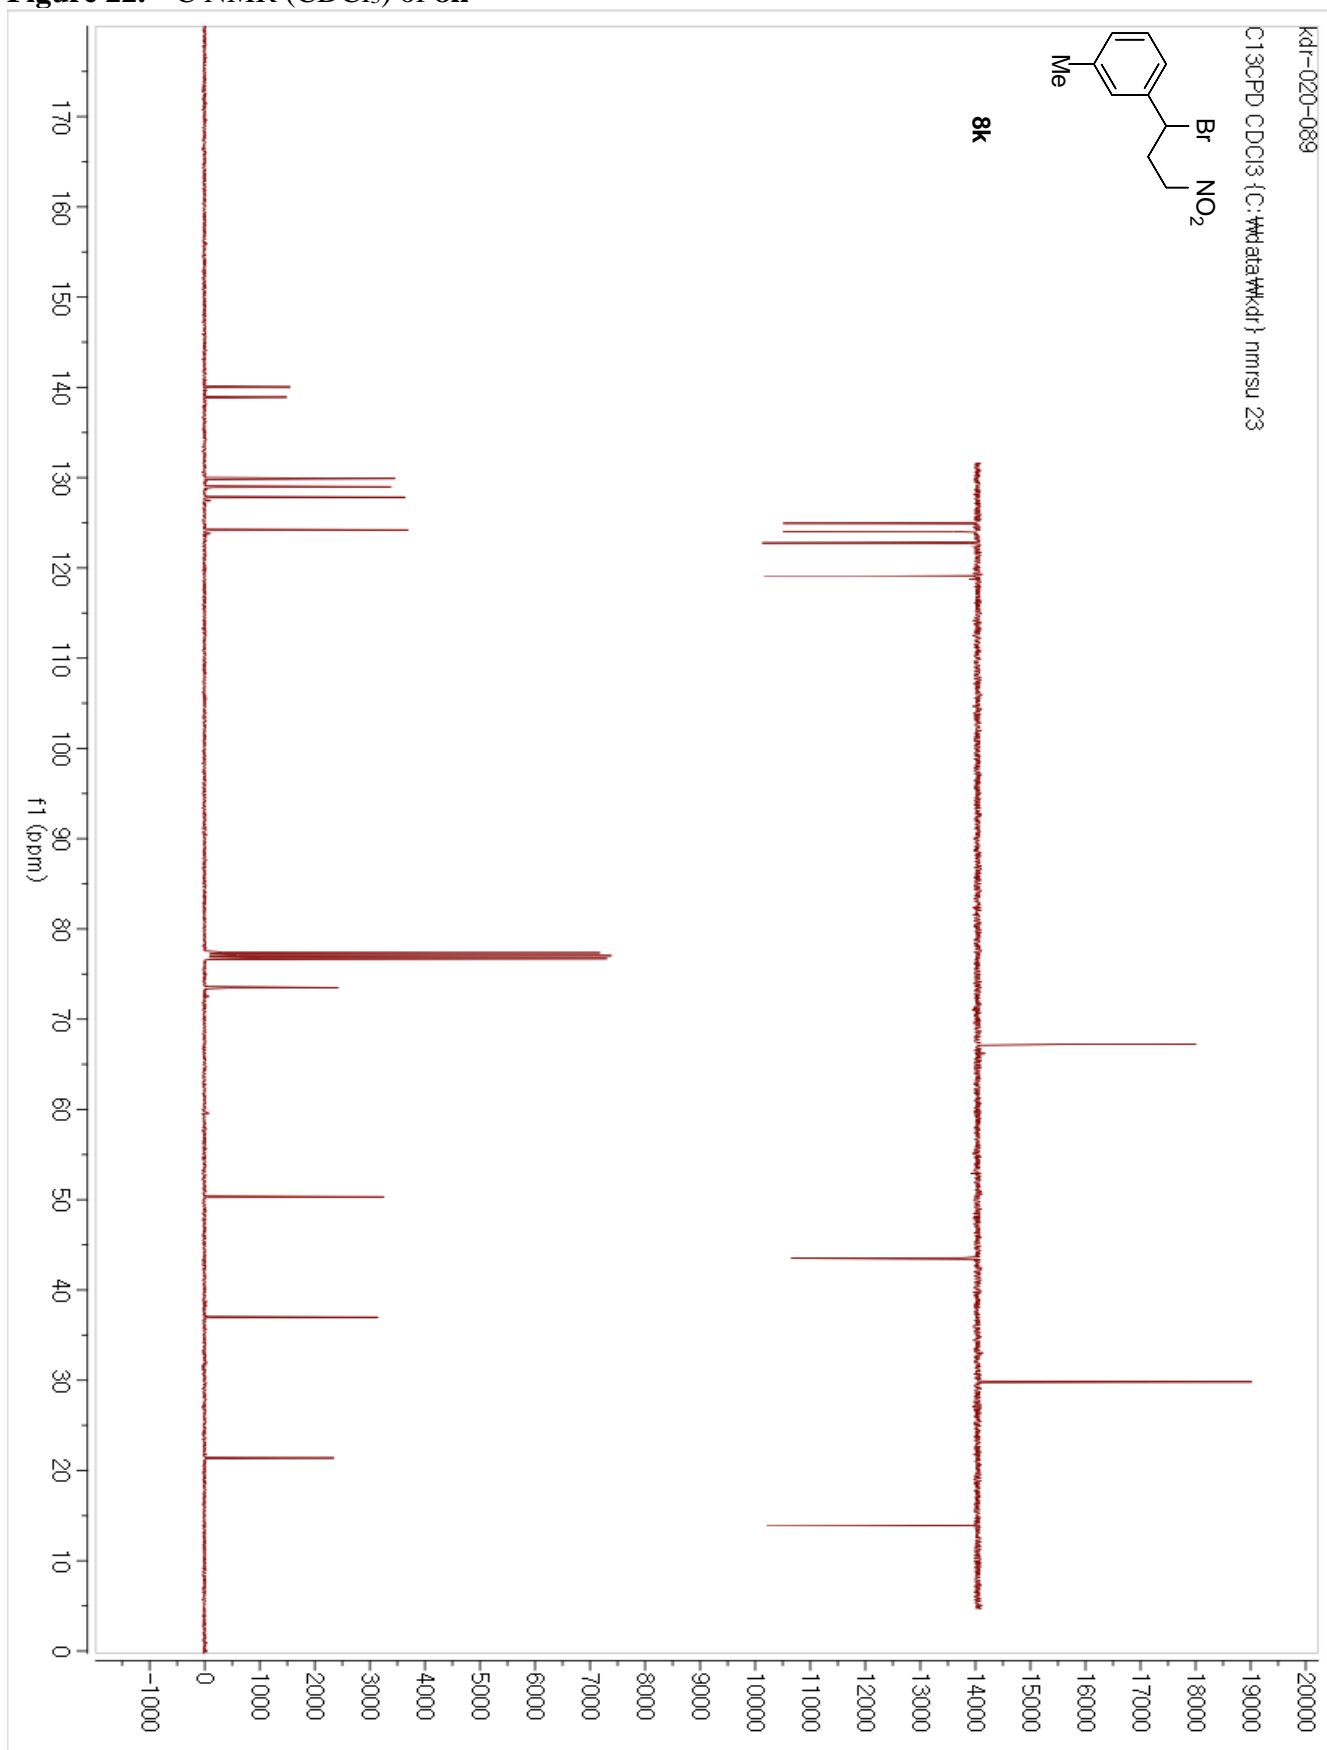

Figure 23.  $^1\text{H}$  NMR ( $\text{CDCl}_3$ ) of **81**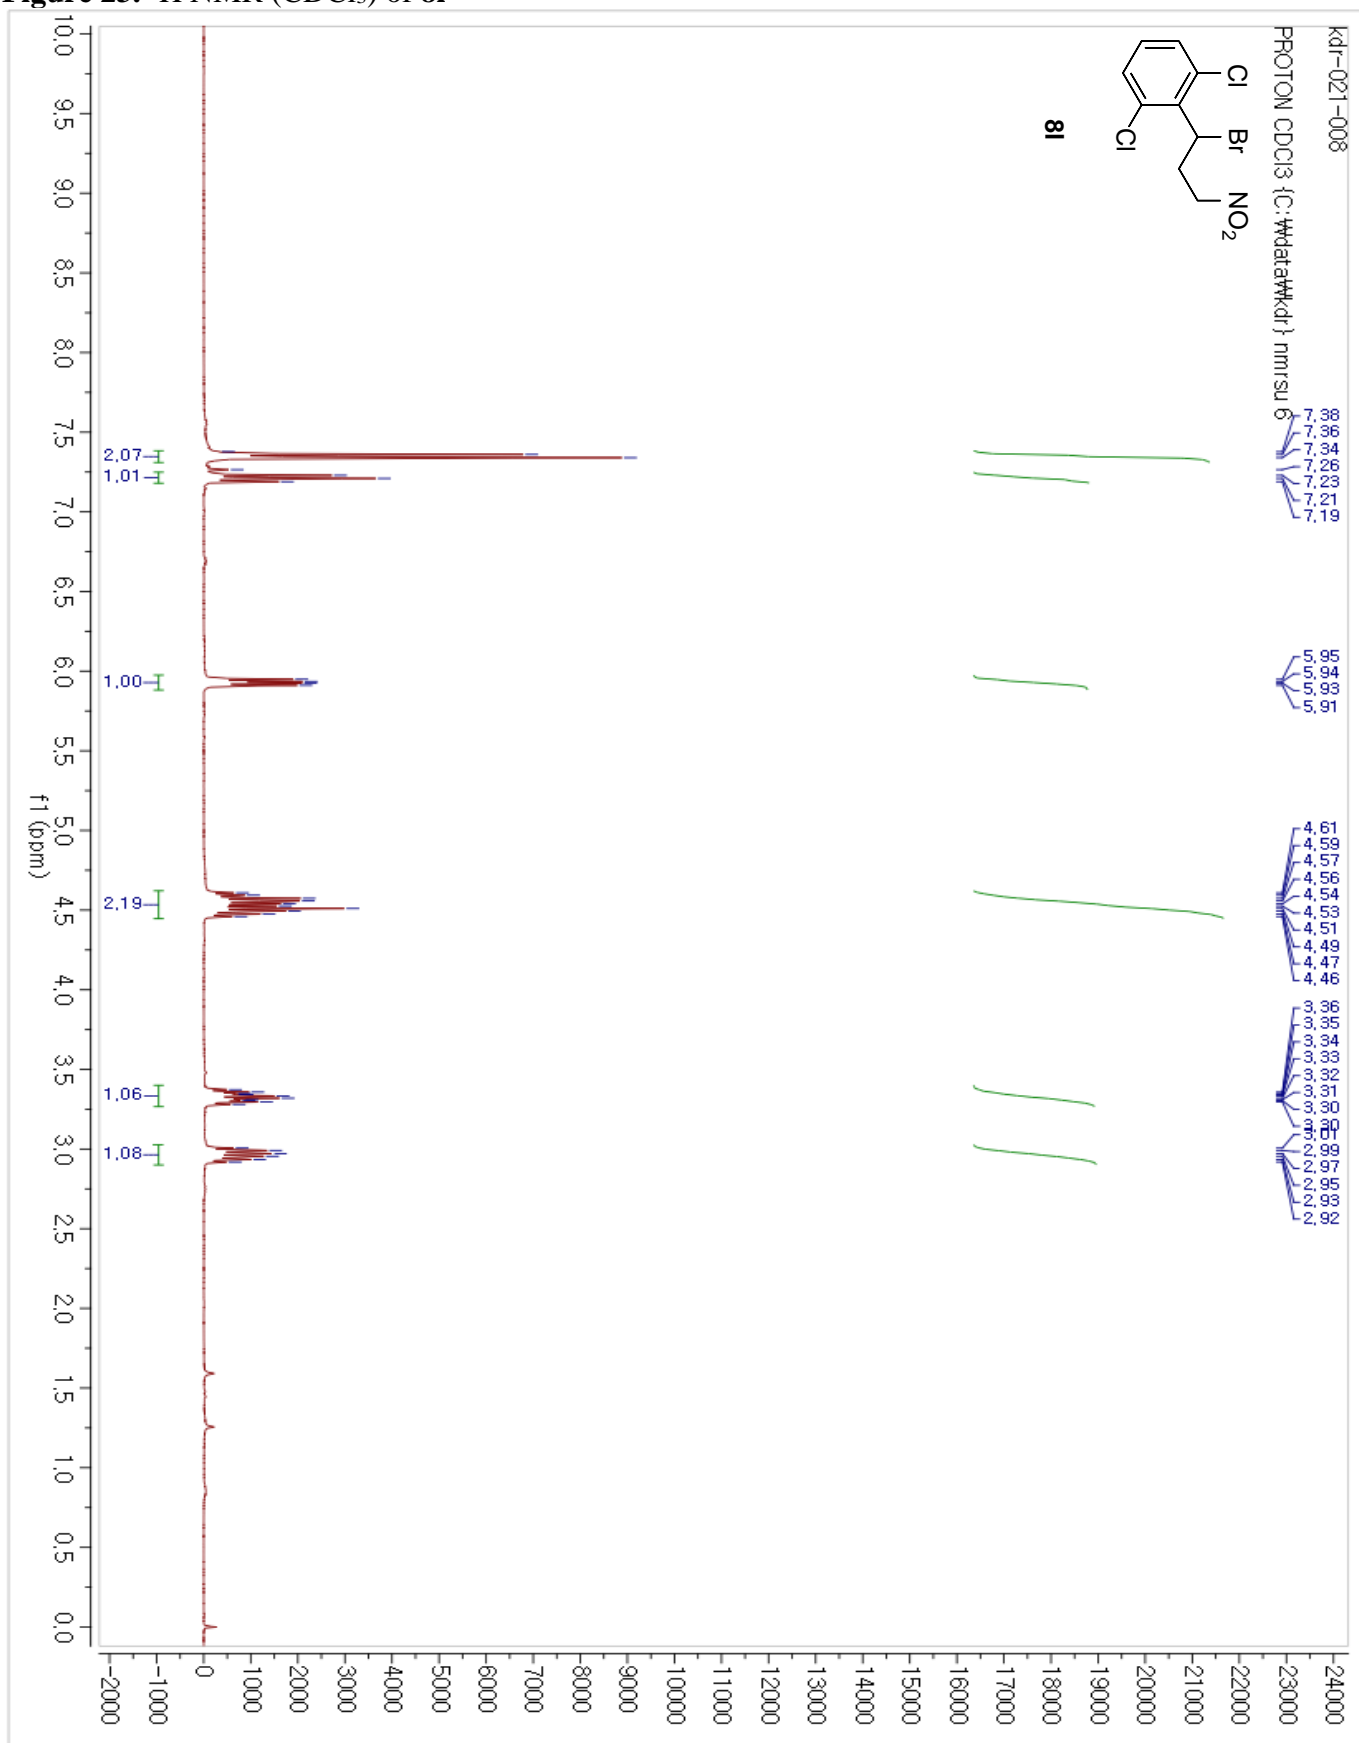

**Figure 24.**  $^{13}\text{C}$  NMR ( $\text{CDCl}_3$ ) of **81**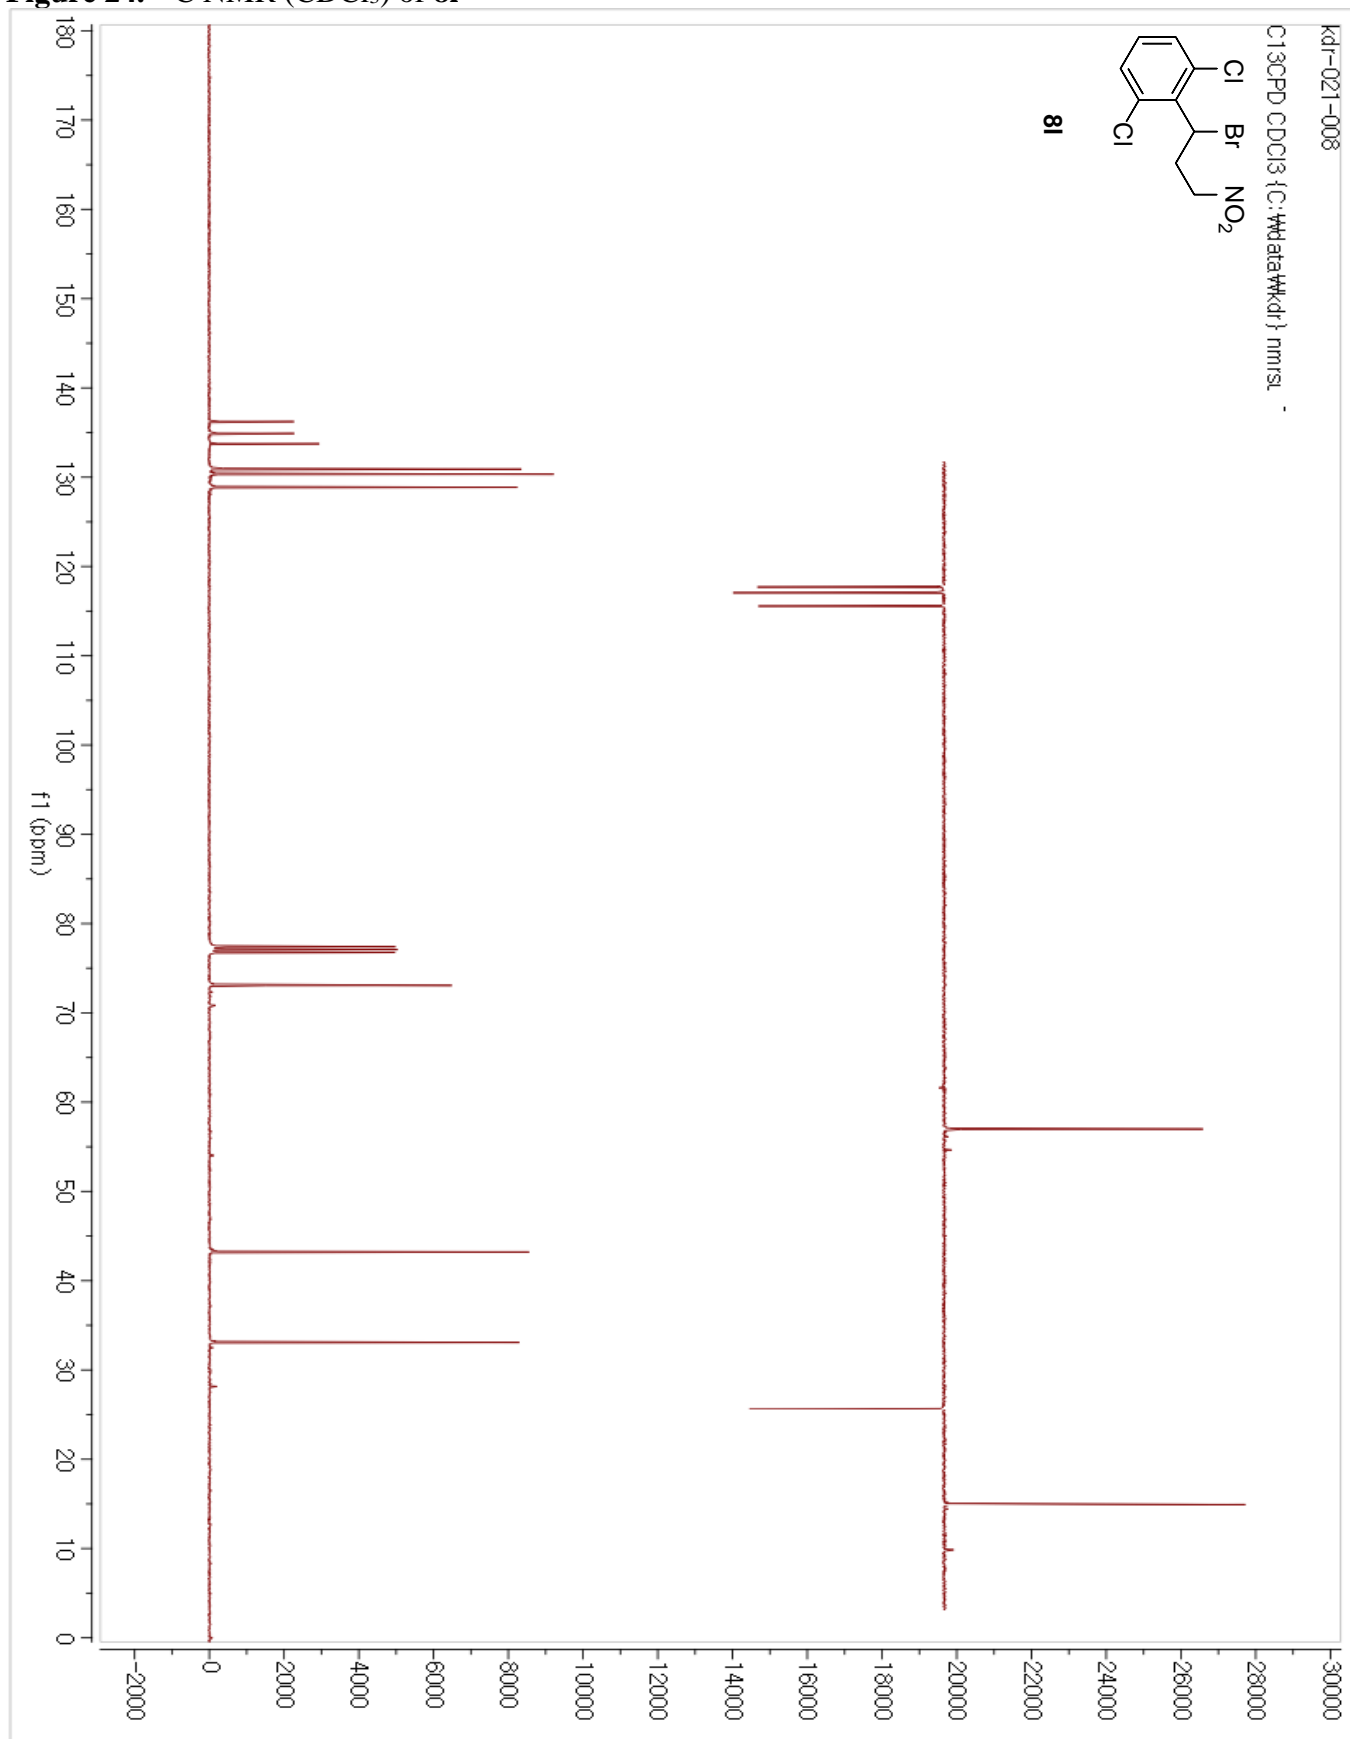



Figure 25  $^1\text{H}$  NMR ( $\text{CDCl}_3$ ) of **8m**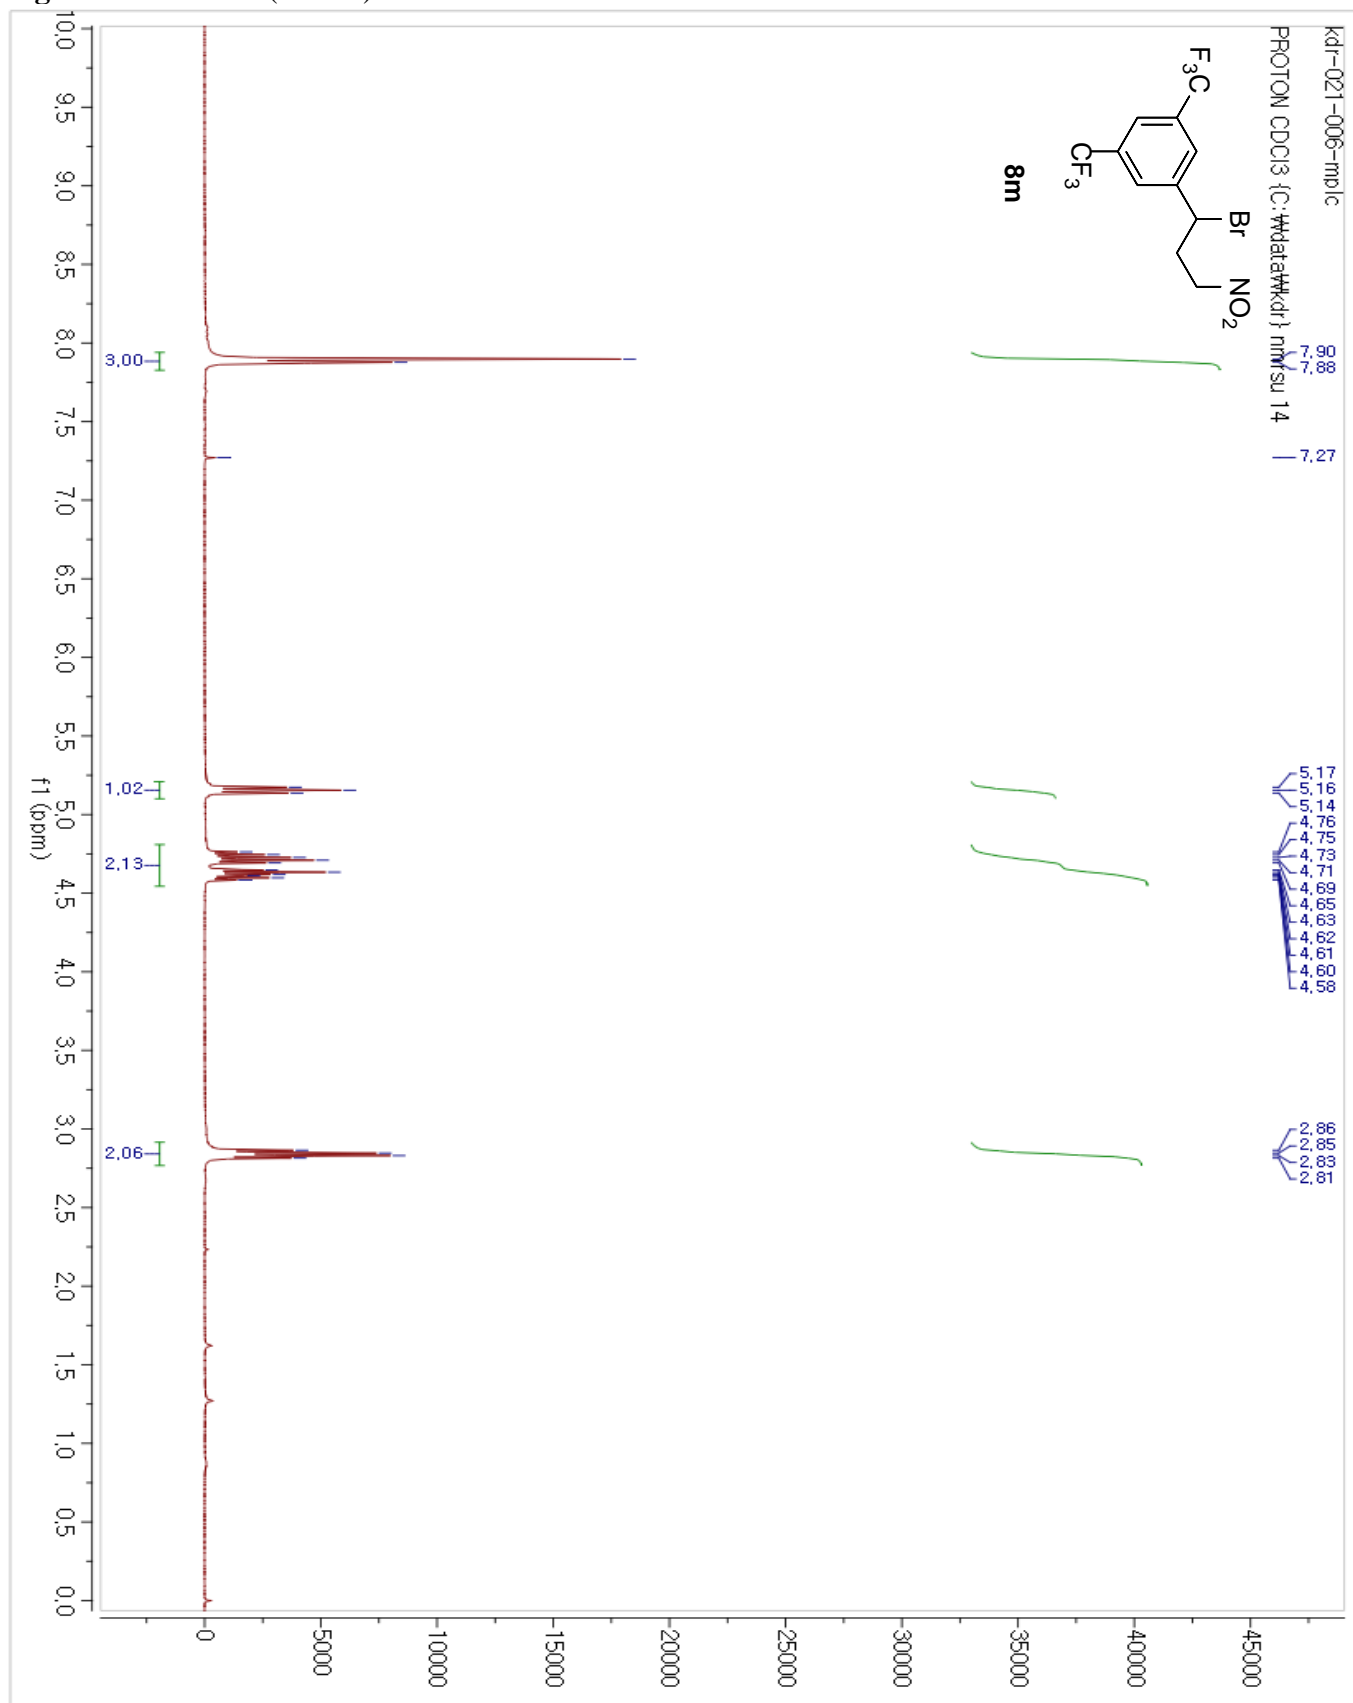

**Figure 26.**  $^{13}\text{C}$  NMR ( $\text{CDCl}_3$ ) of **8m**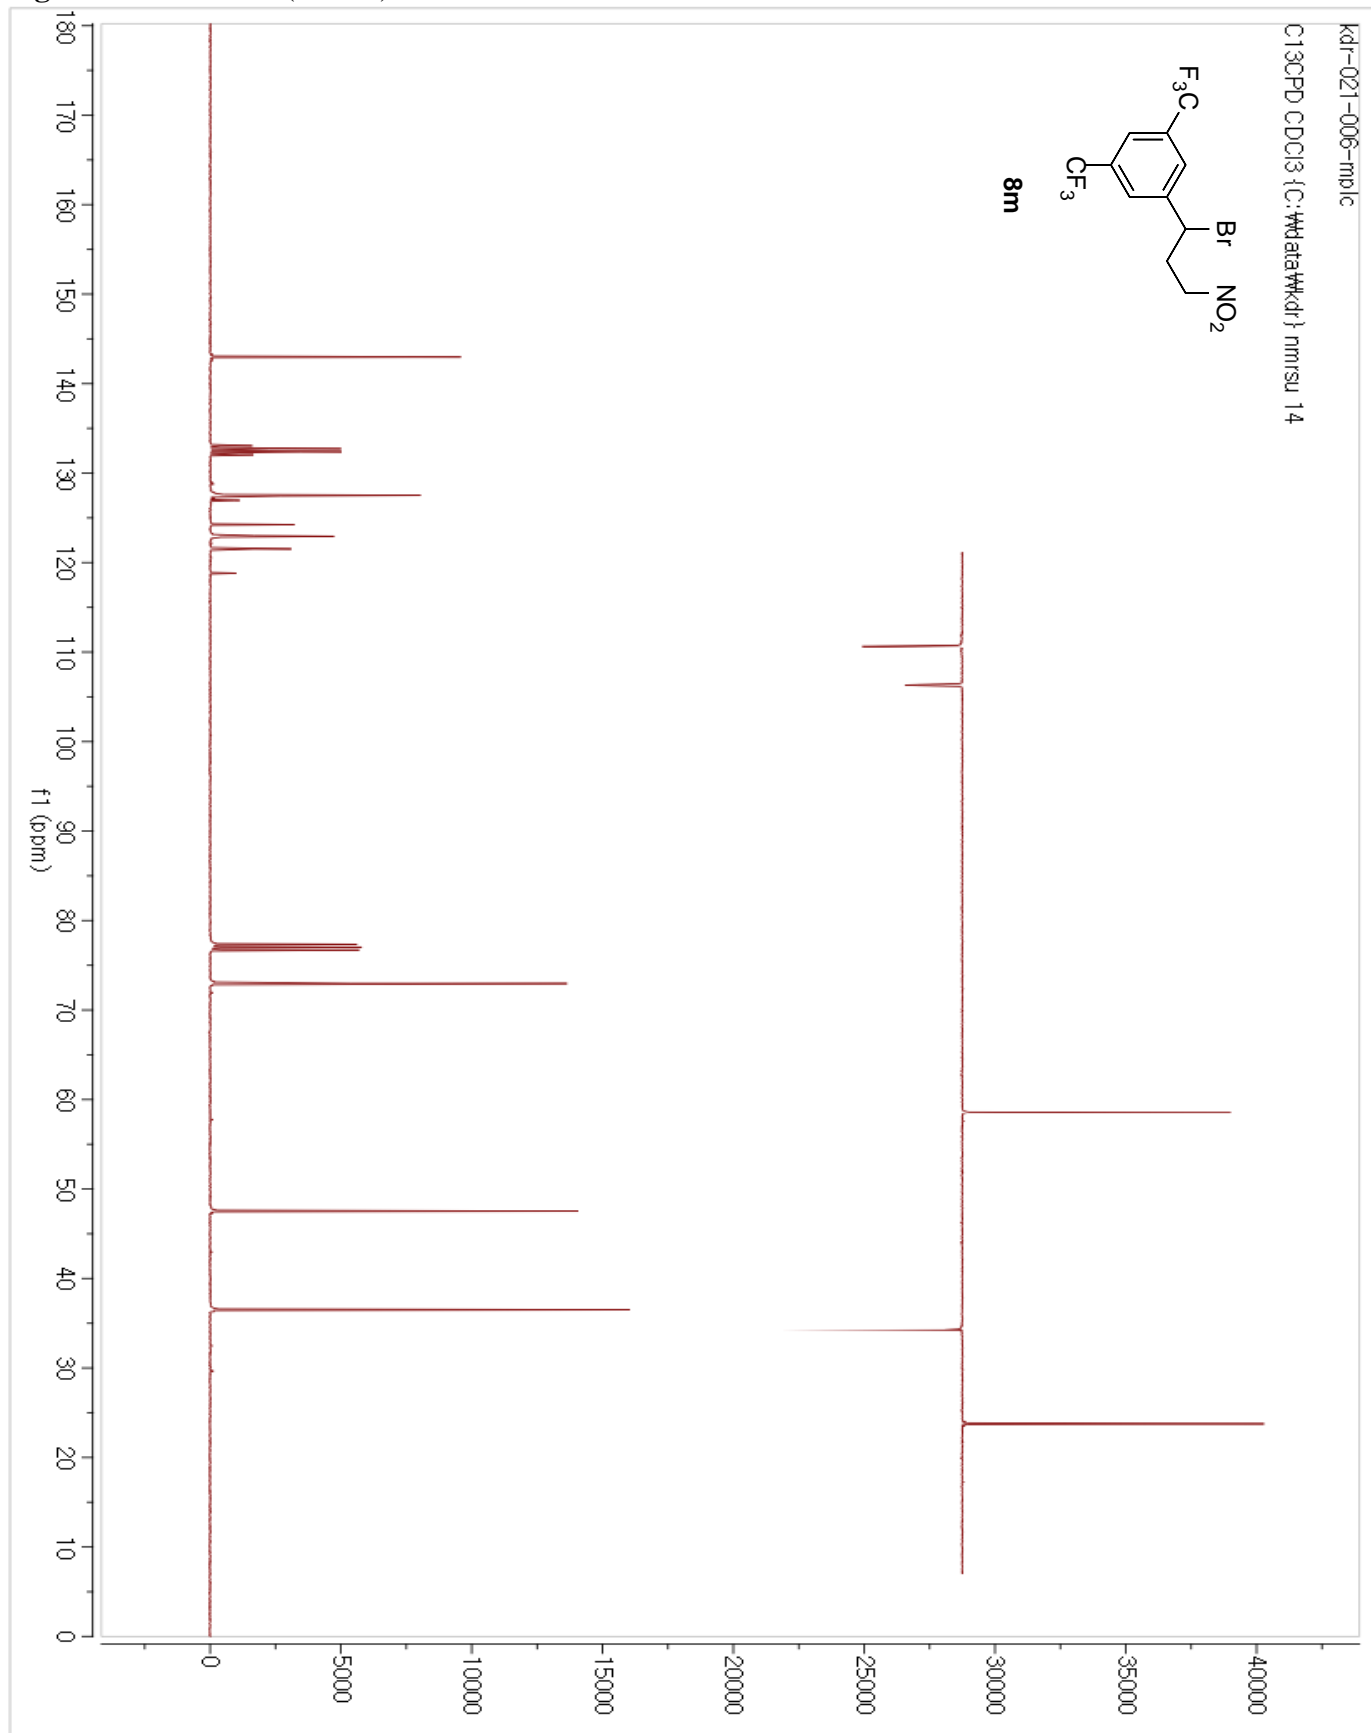

Figure 27.  $^{19}\text{F}$  NMR ( $\text{CDCl}_3$ ) of **8m**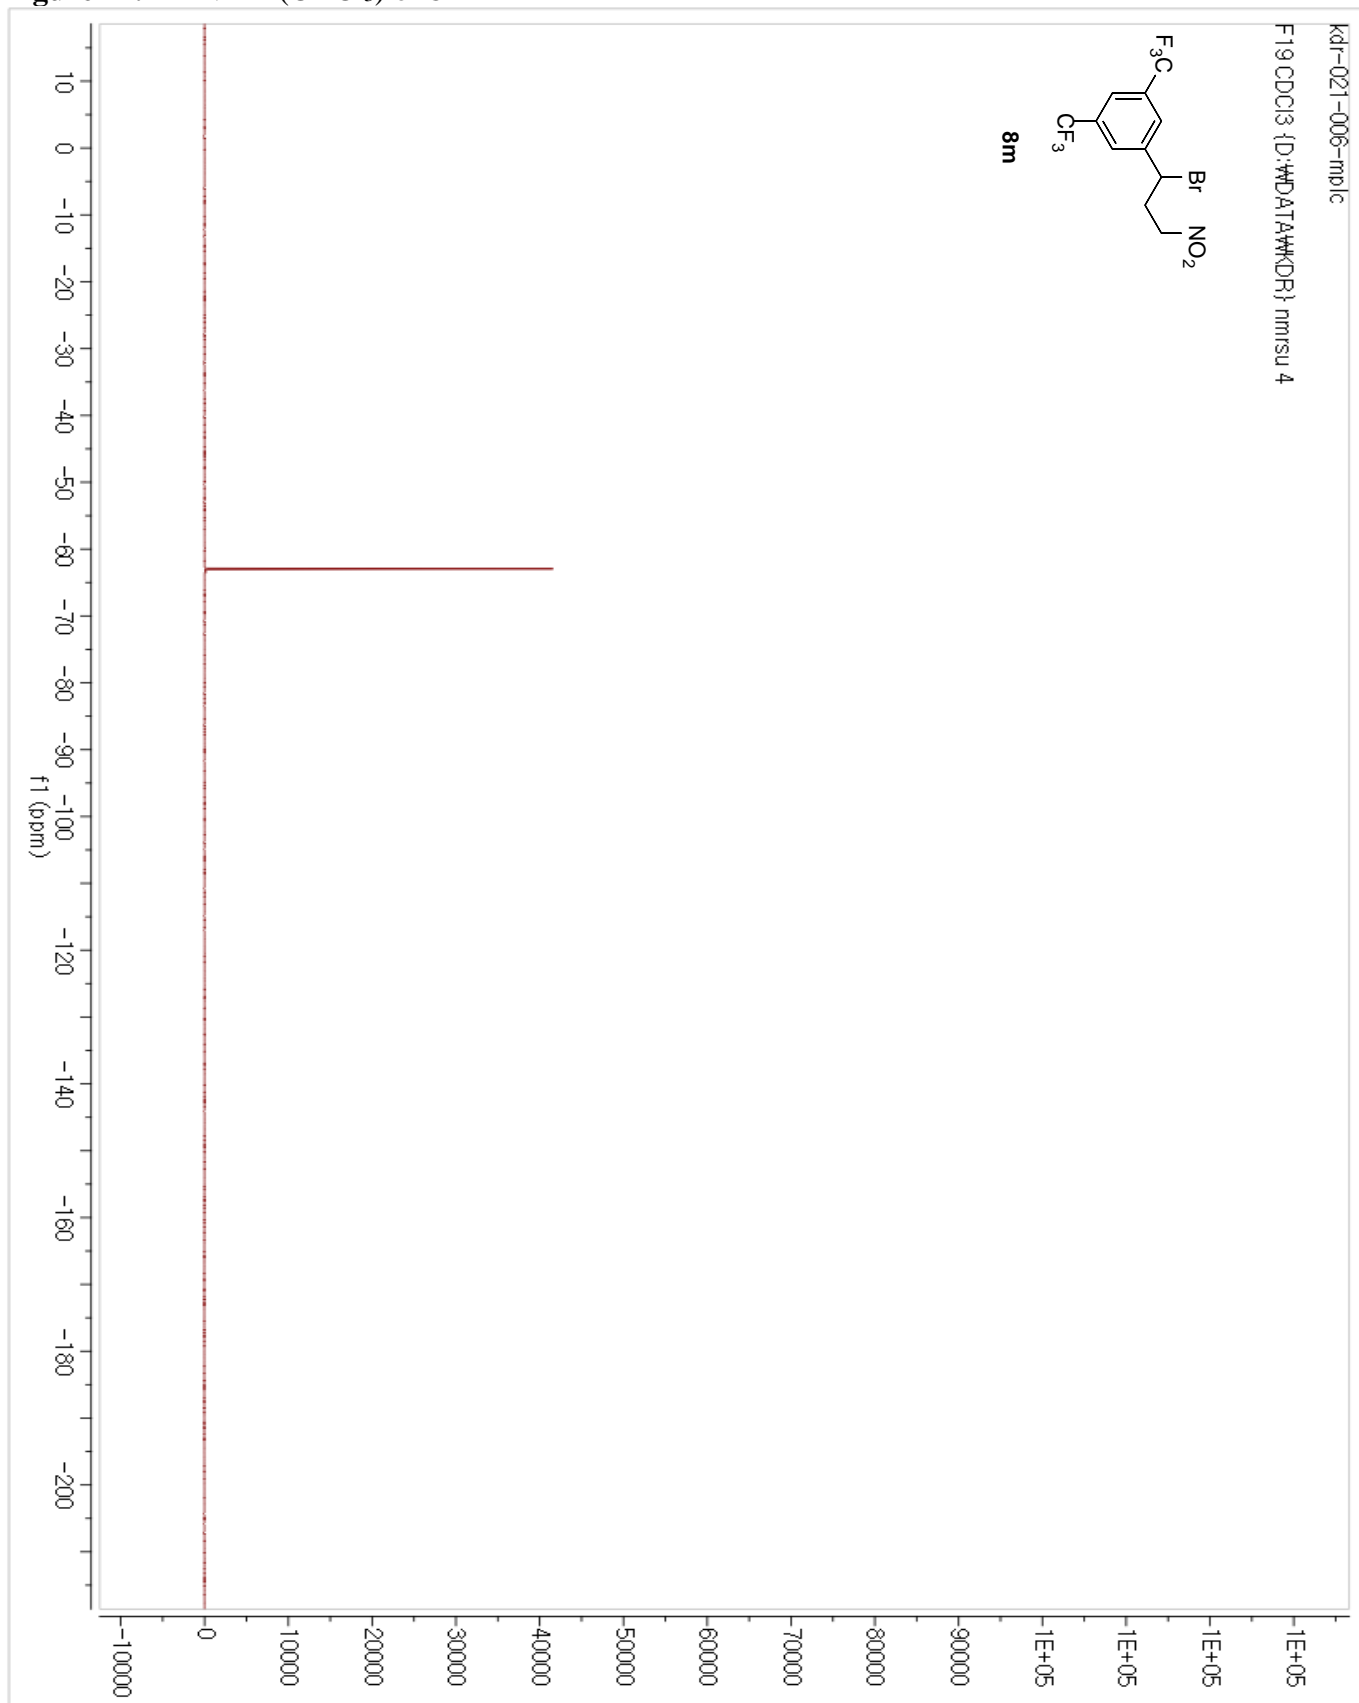

Figure 28.  $^1\text{H}$  NMR ( $\text{CDCl}_3$ ) of **8n**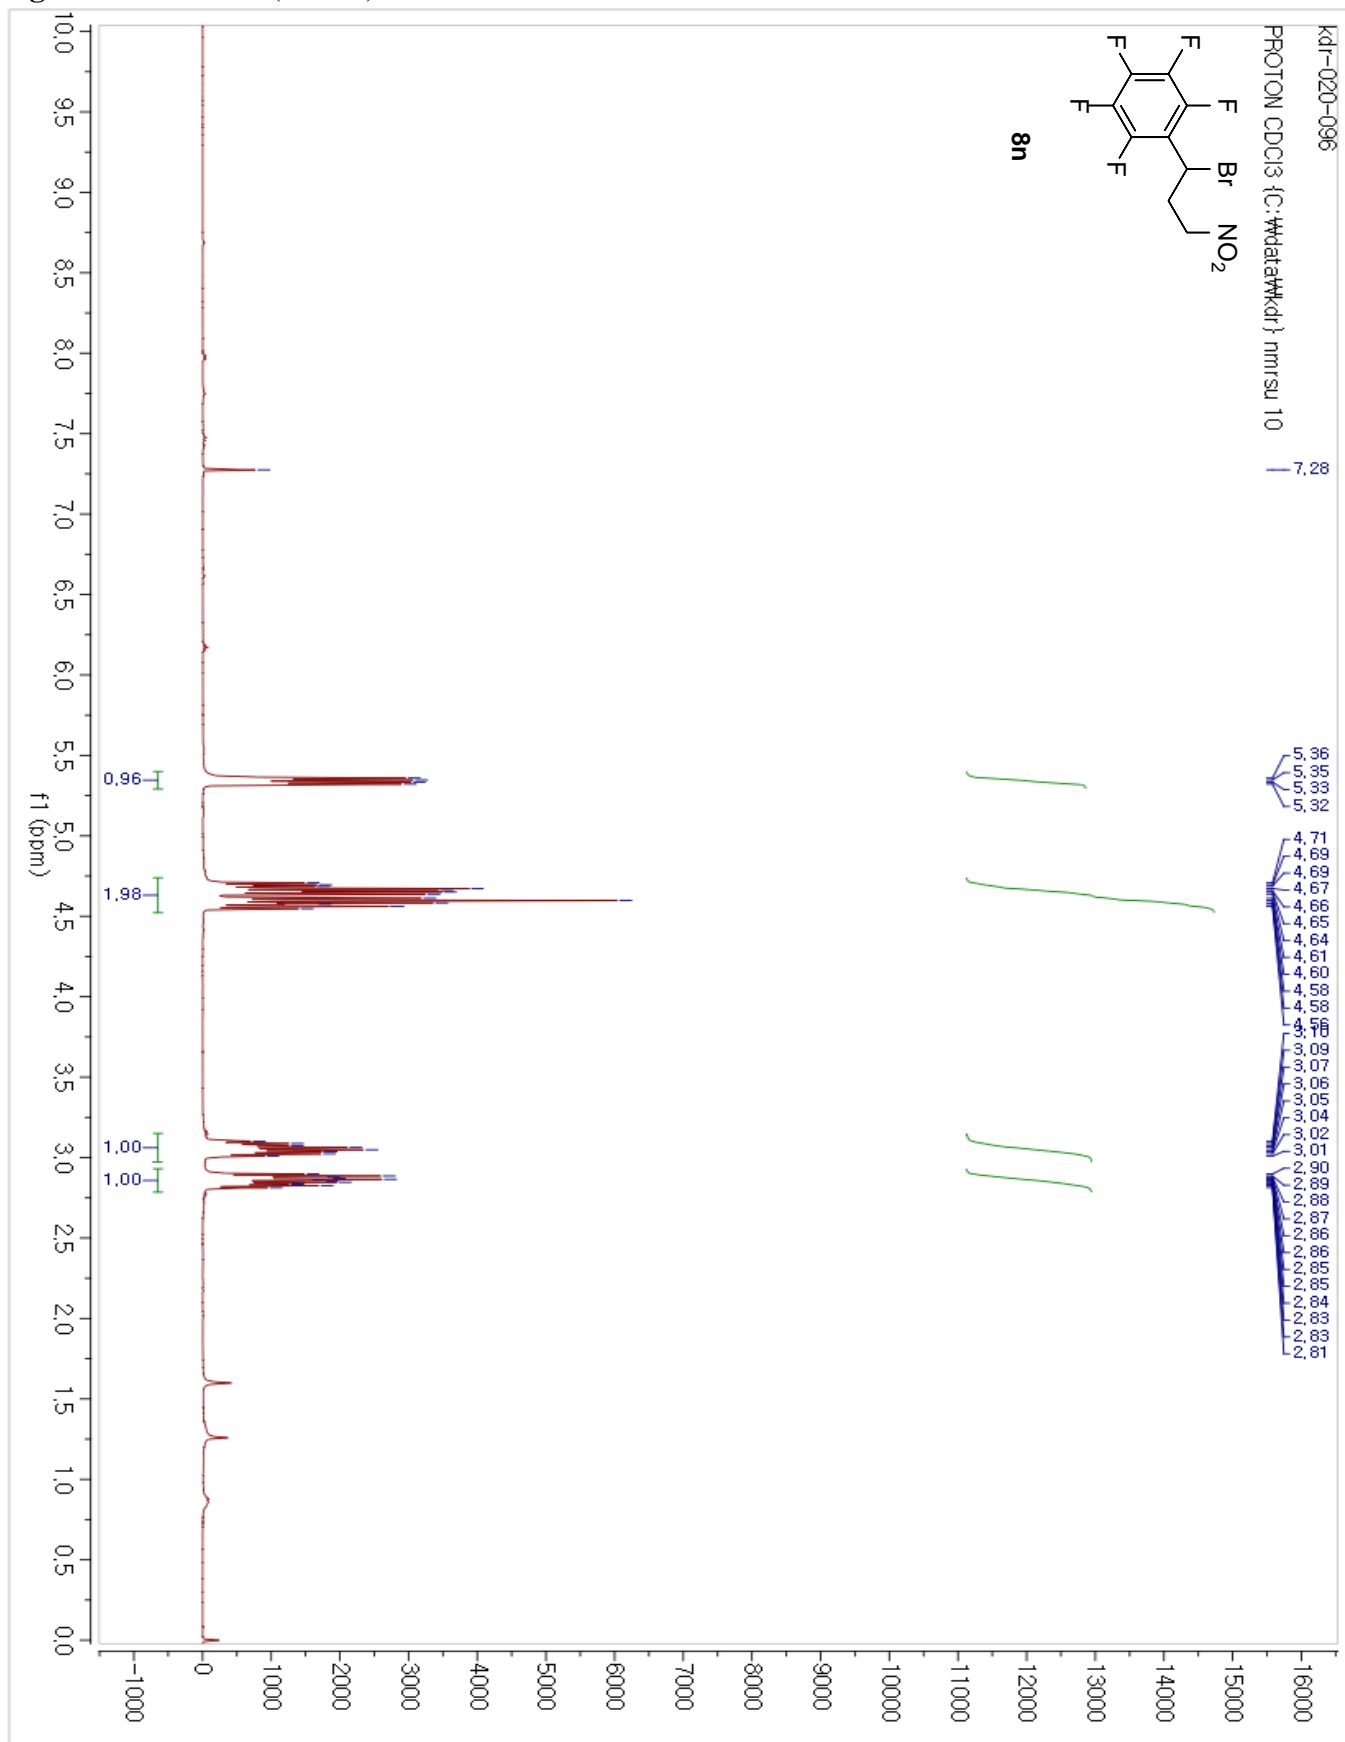

Figure 29.  $^{13}\text{C}$  NMR ( $\text{CDCl}_3$ ) of **8n**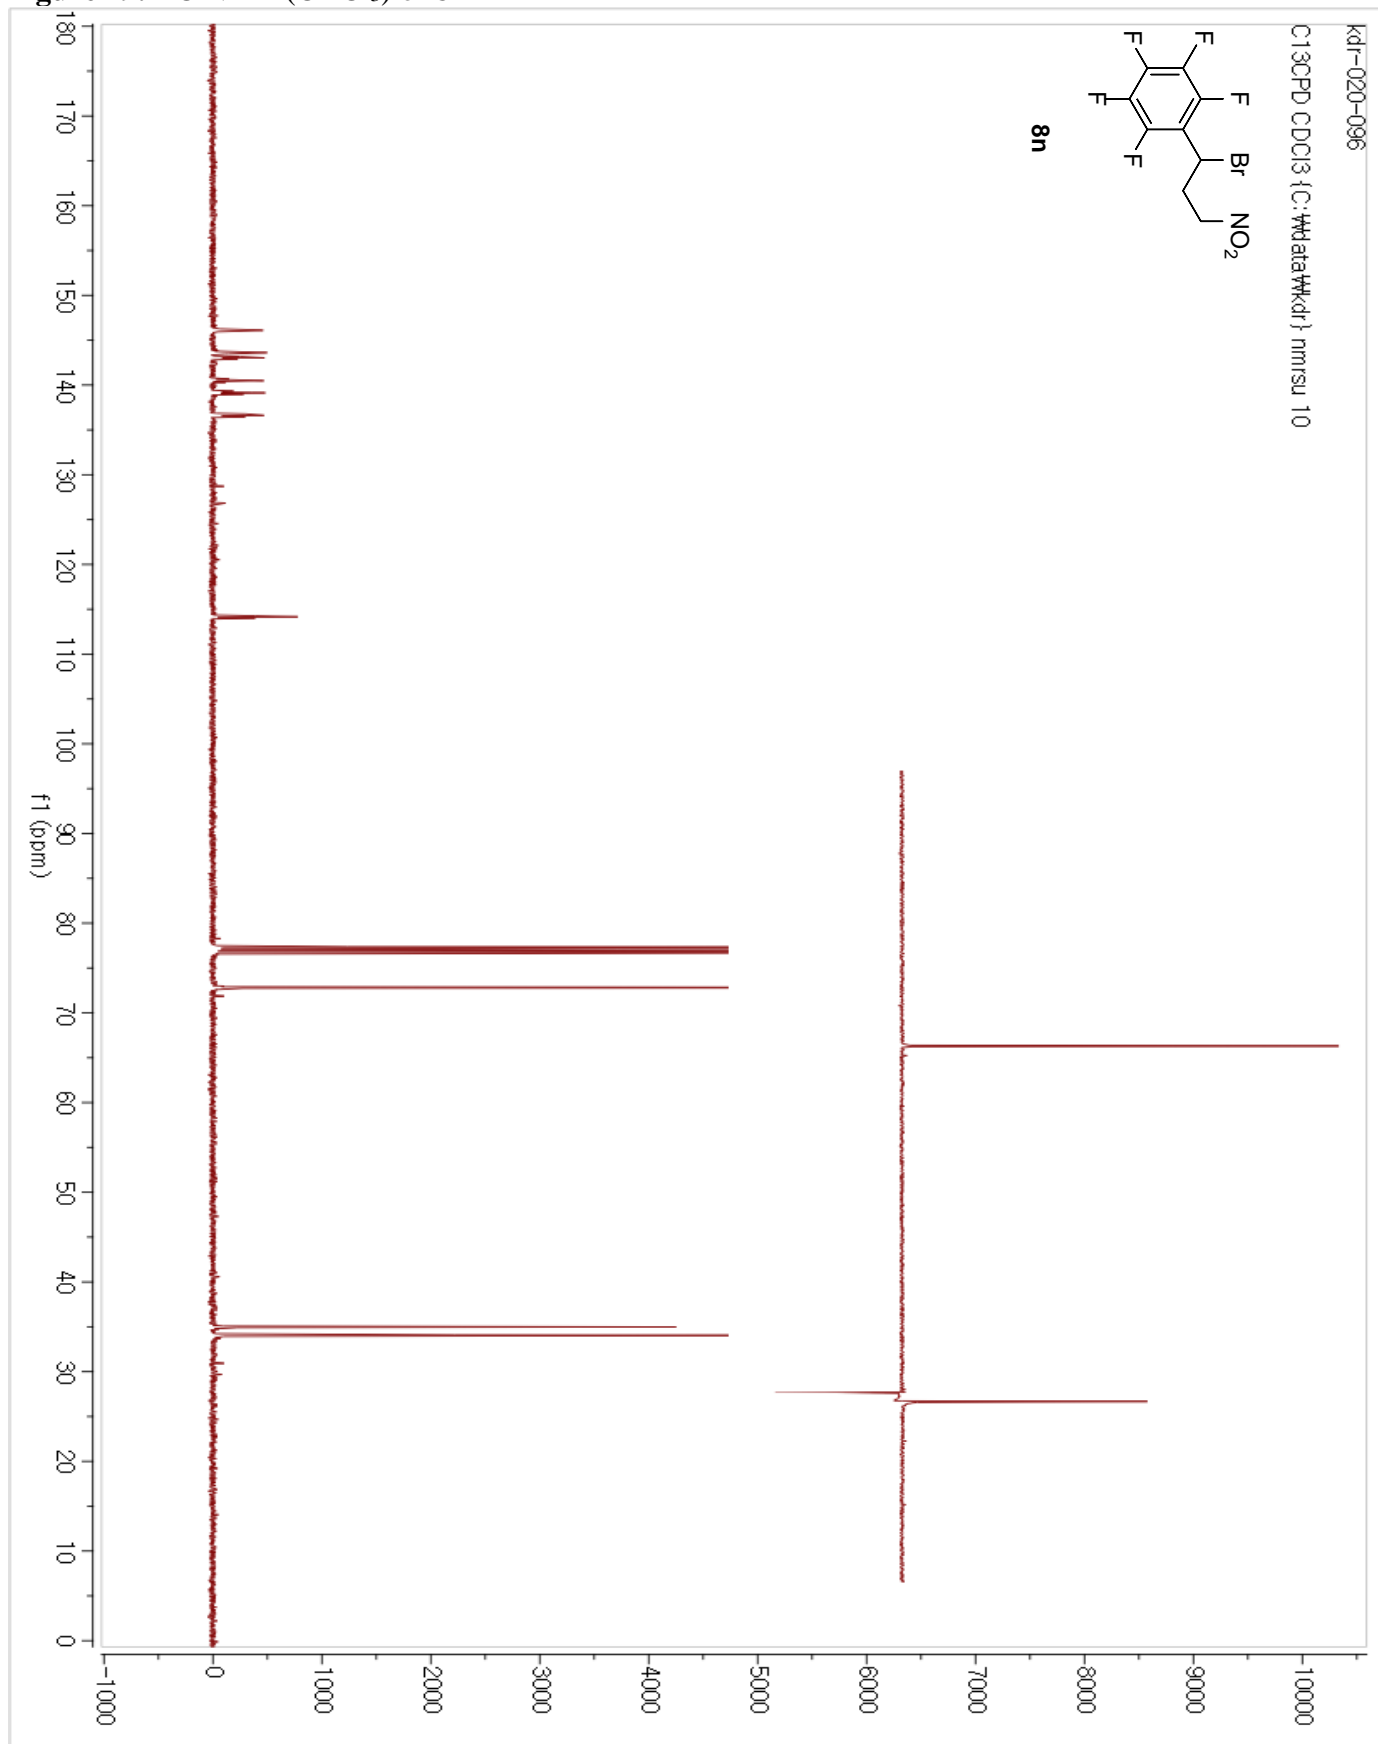

**Figure 30.**  $^1\text{H}$  NMR ( $\text{CDCl}_3$ ) of **9b**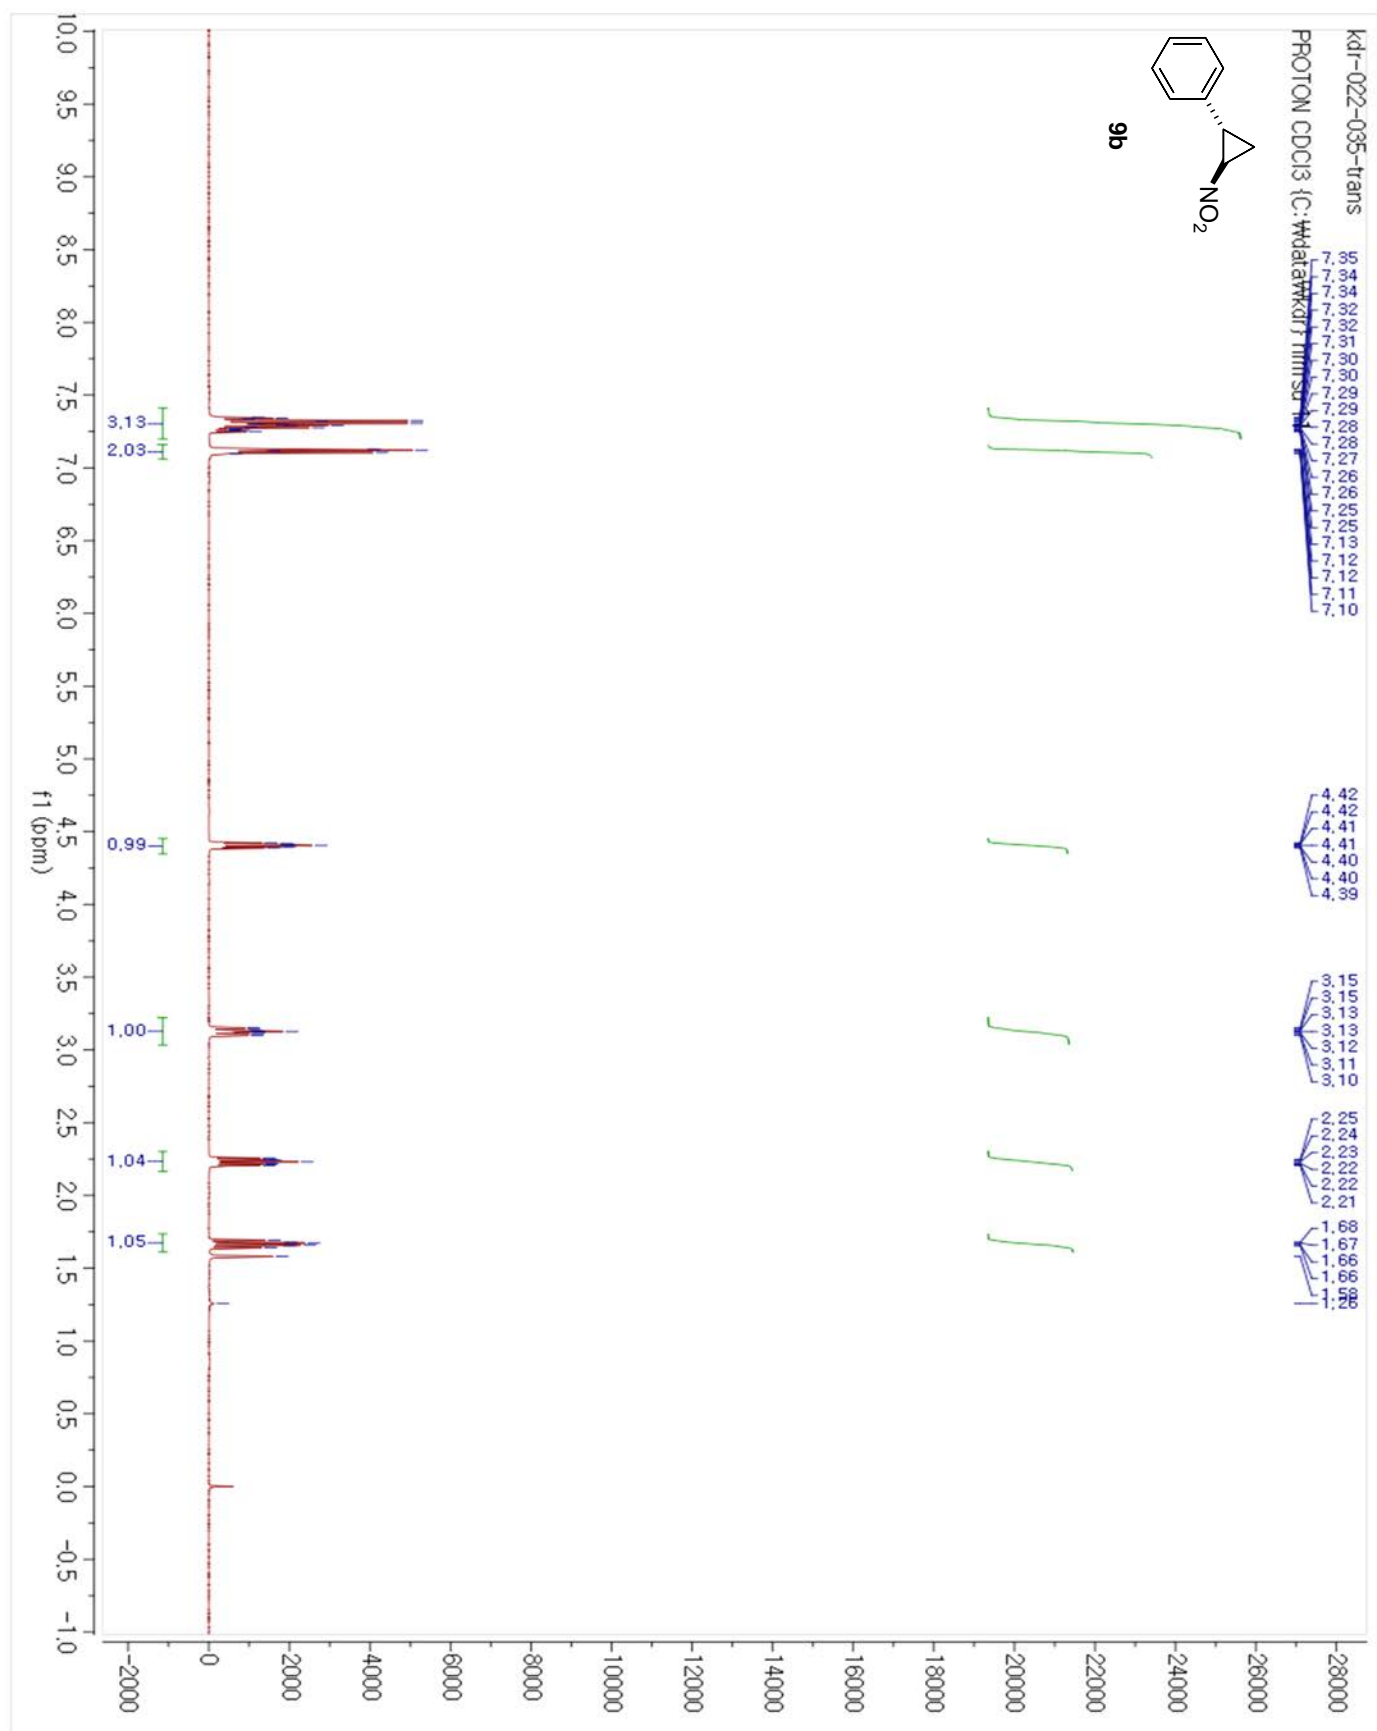

**Figure 31.**  $^{13}\text{C}$  NMR ( $\text{CDCl}_3$ ) of **9b**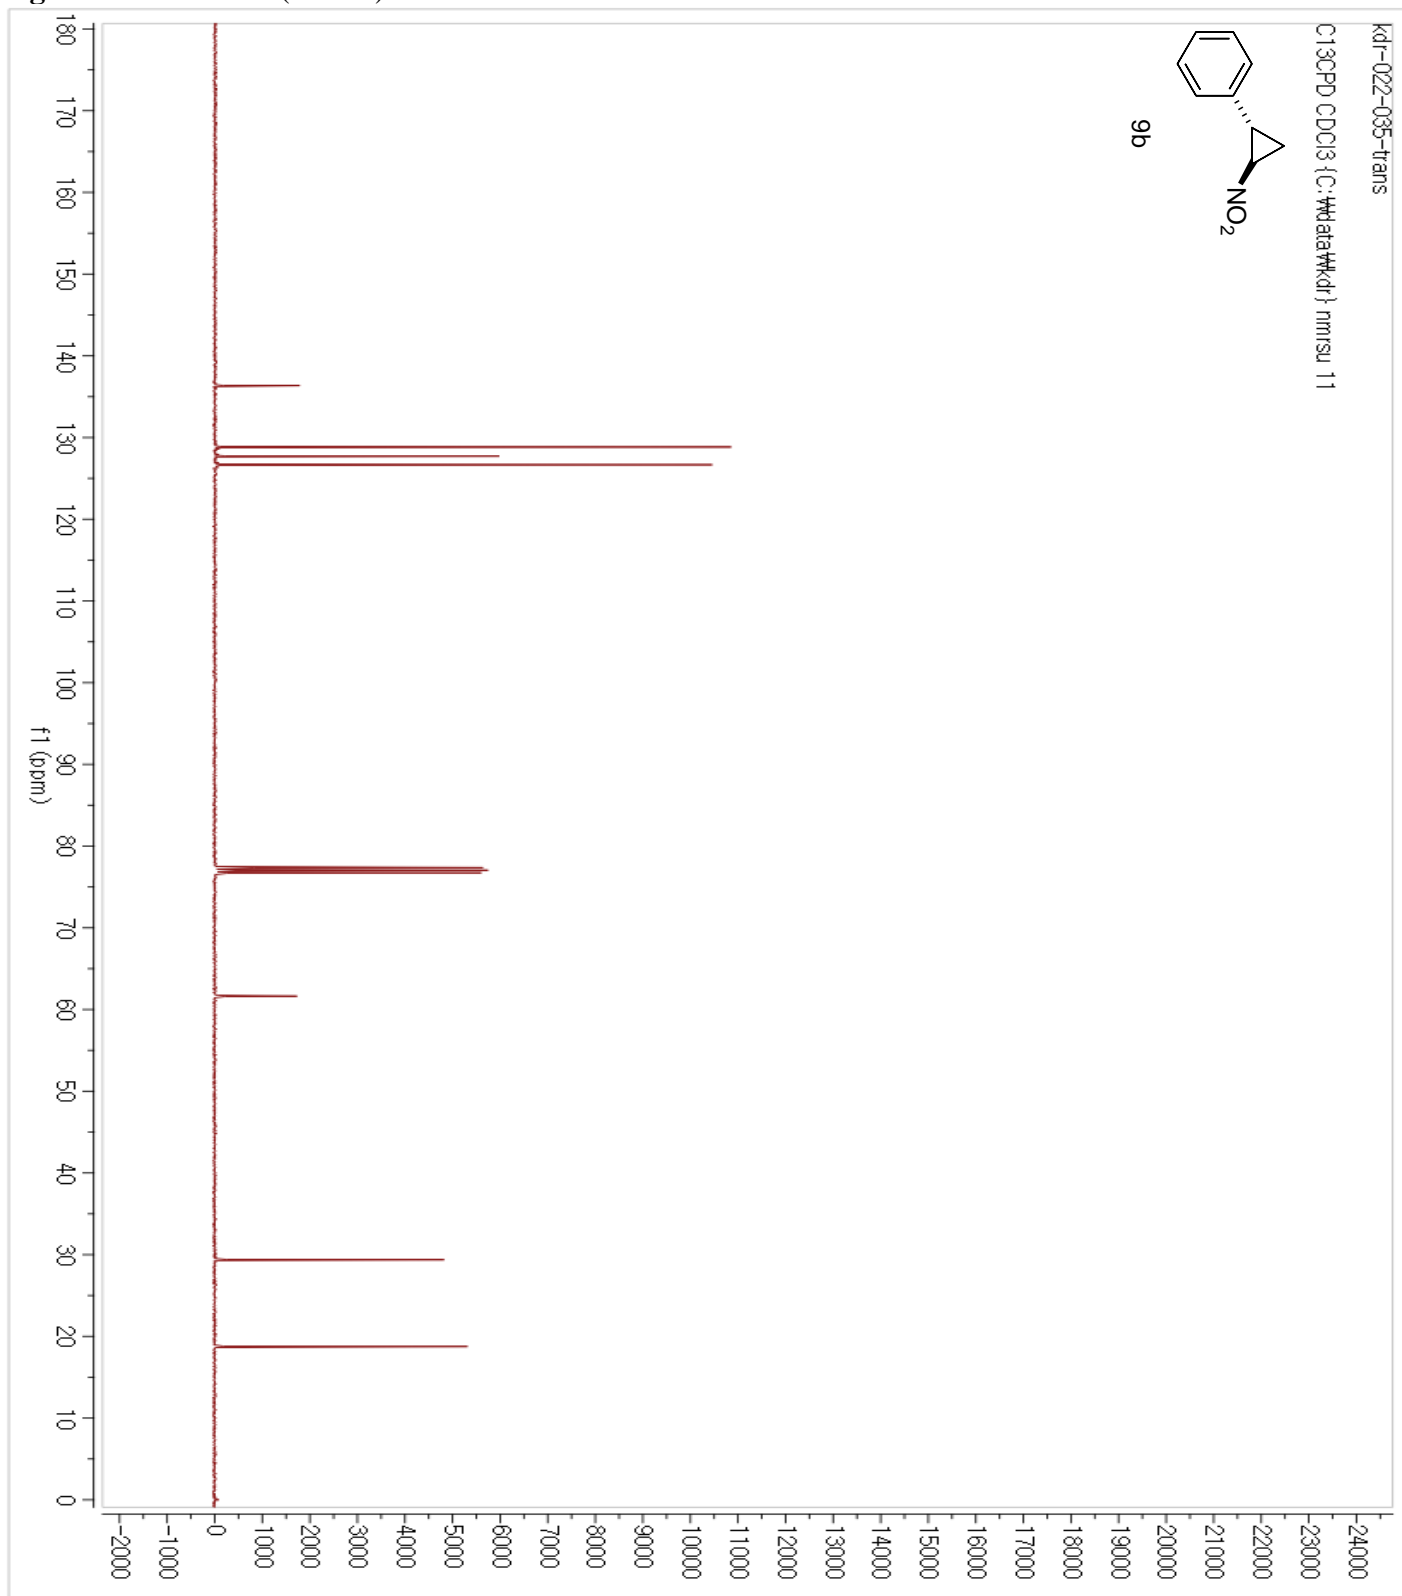

Figure 32.  $^1\text{H}$  NMR ( $\text{CDCl}_3$ ) of **9c**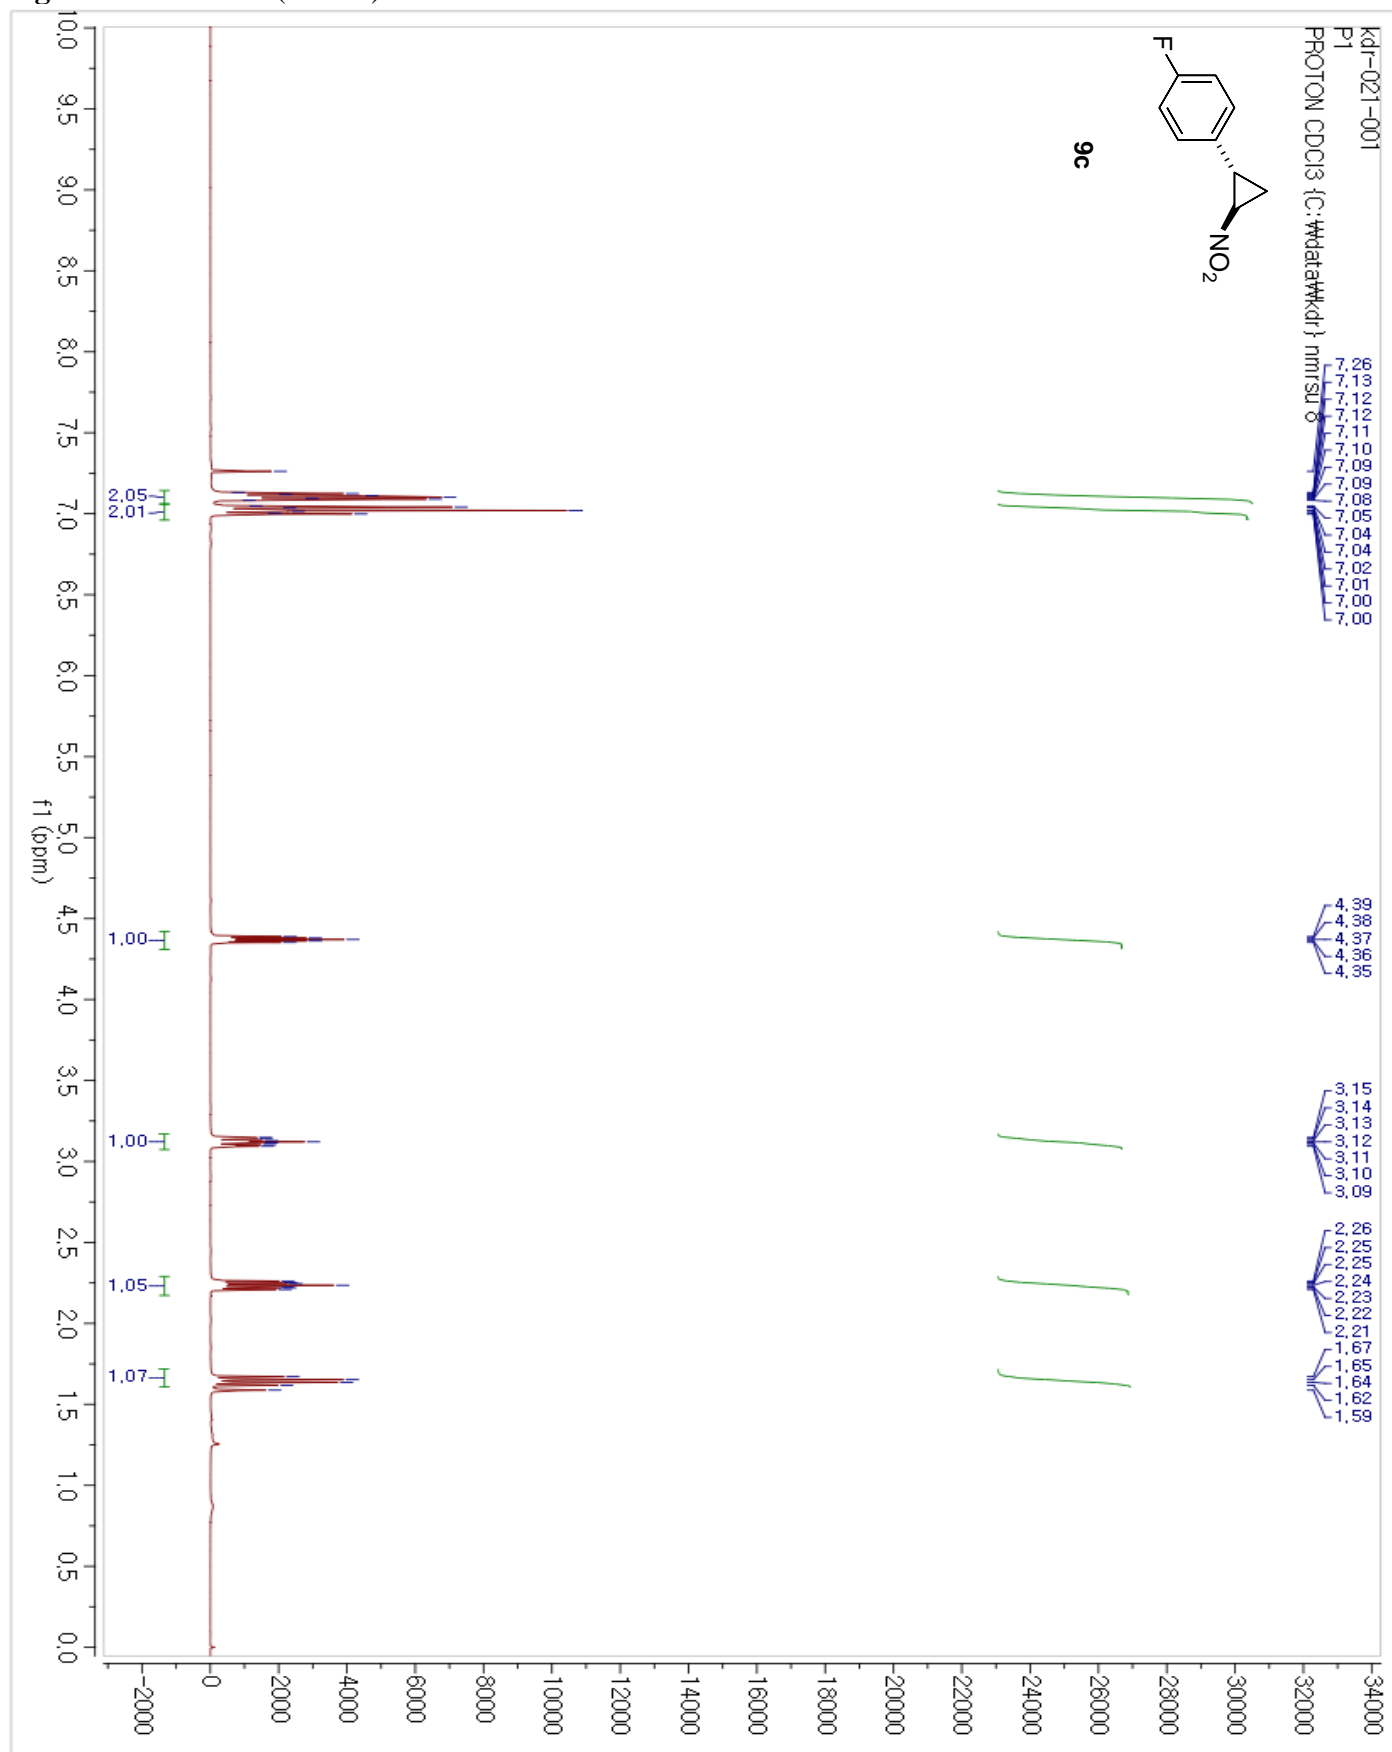



**Figure 33.**  $^{13}\text{C}$  NMR ( $\text{CDCl}_3$ ) of **9c**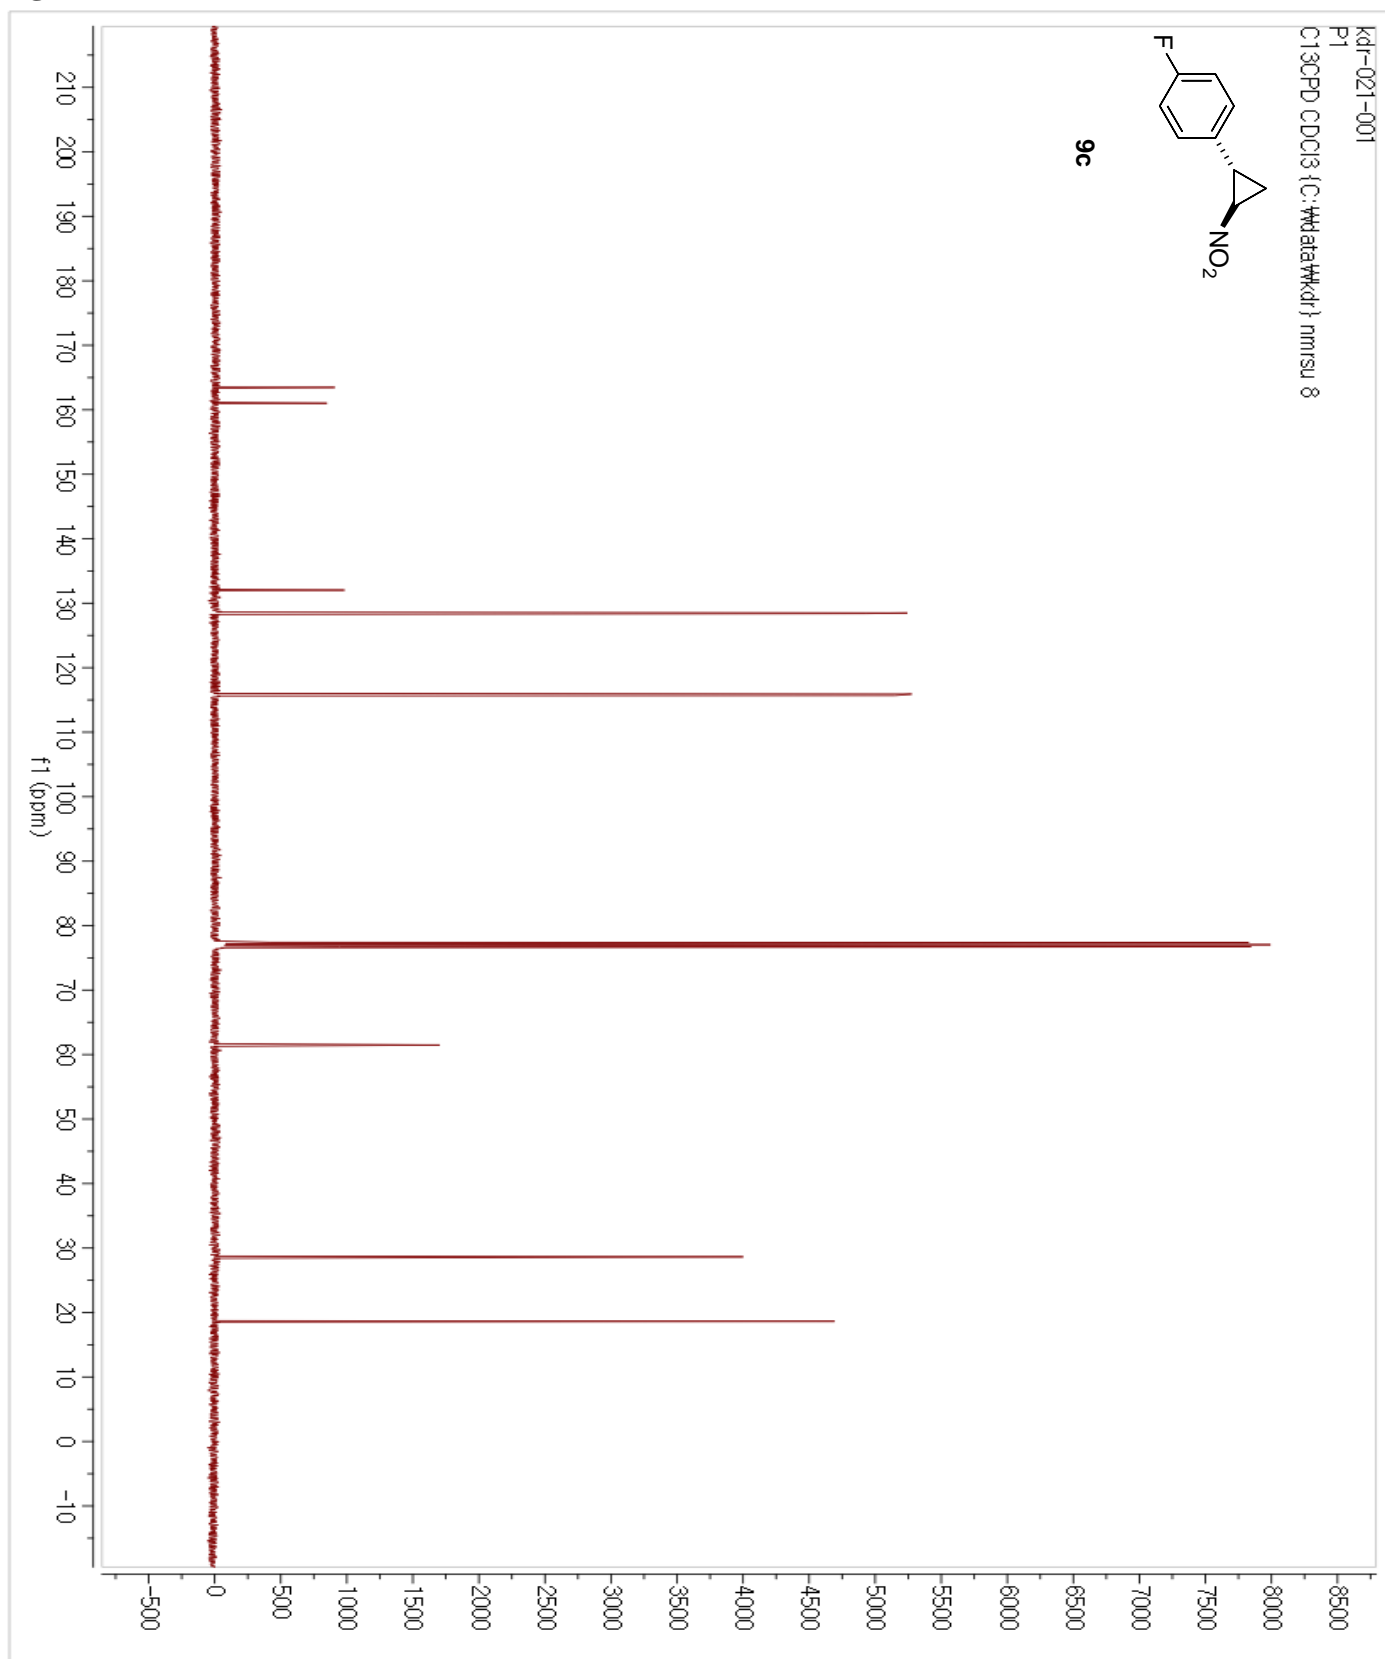

**Figure 34.**  $^{19}\text{F}$  NMR ( $\text{CDCl}_3$ ) of **9c**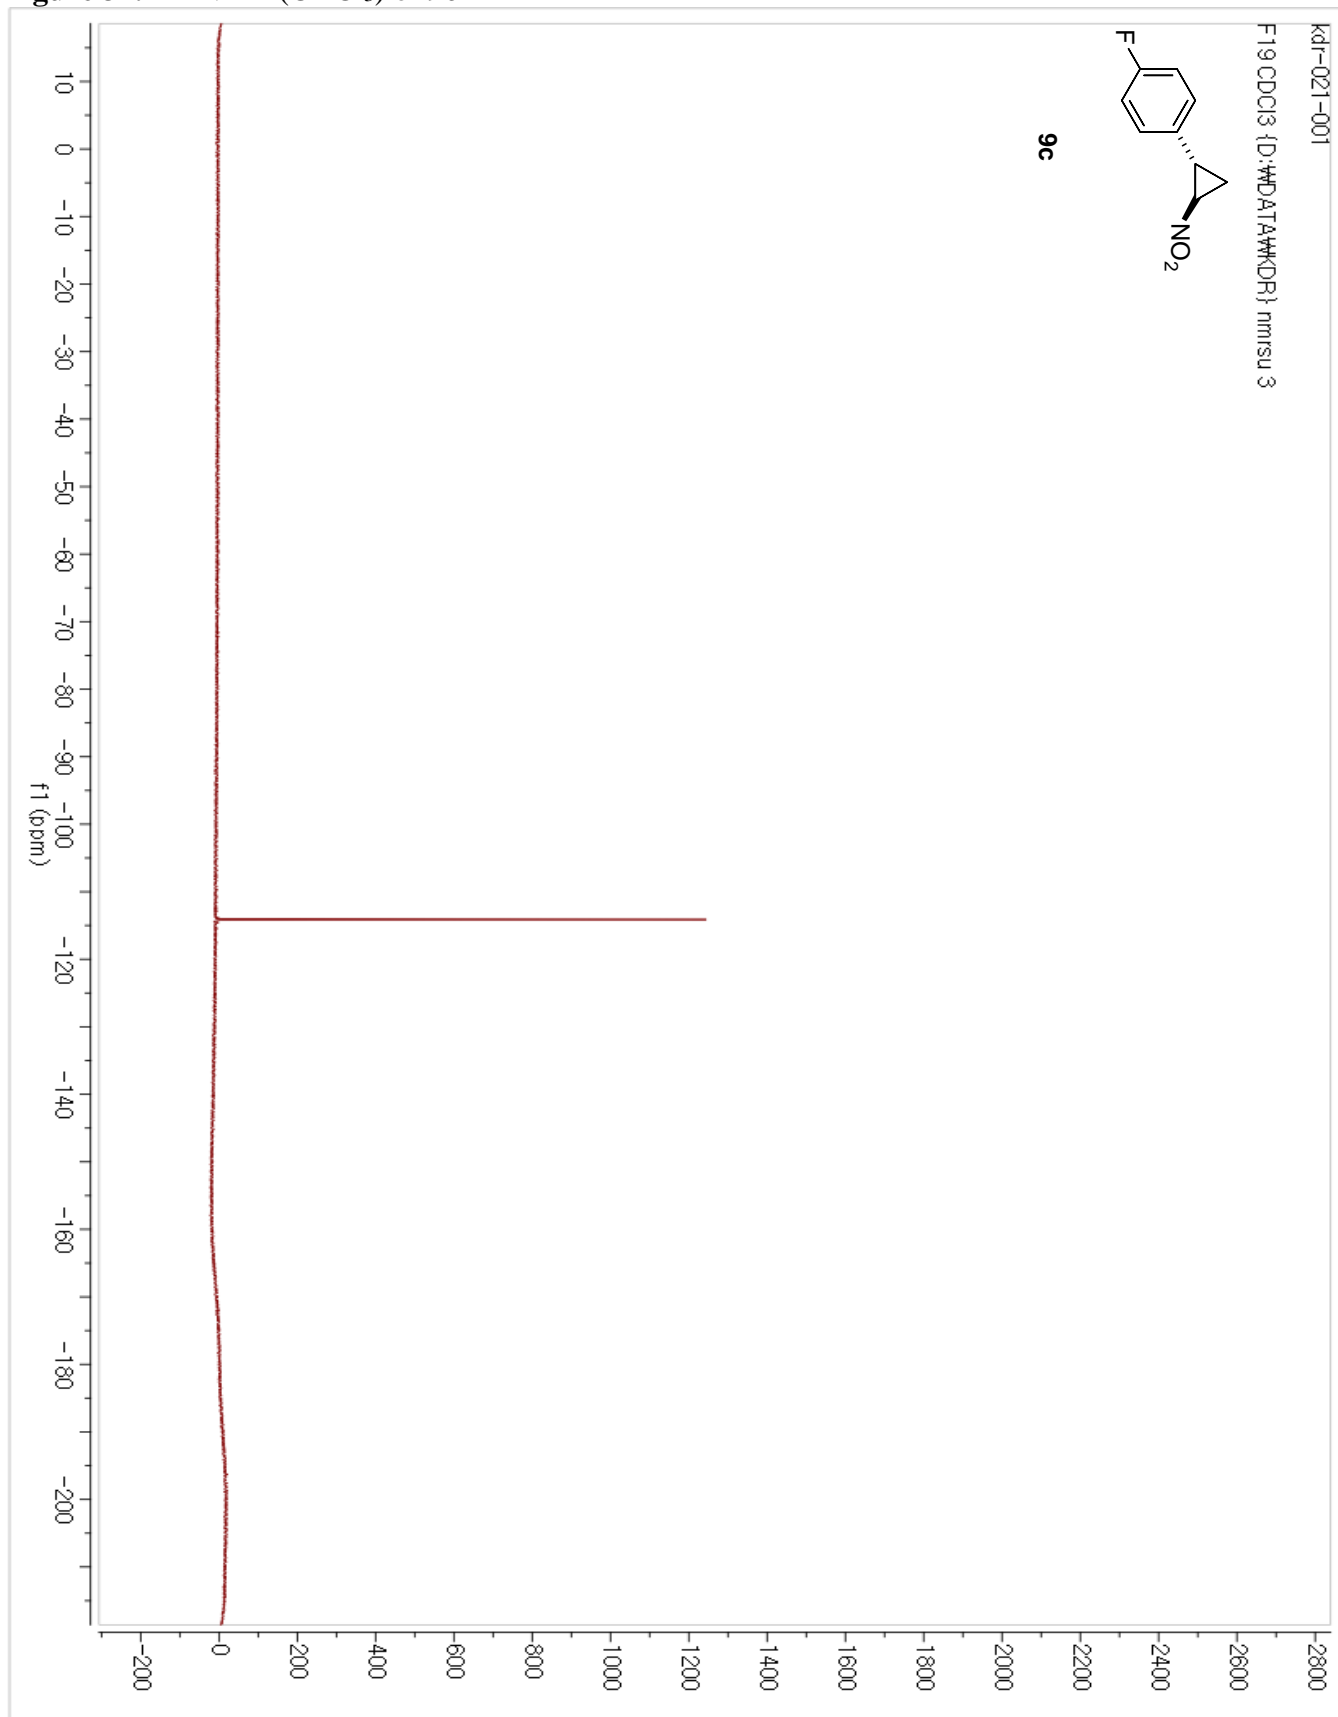

Figure 35.  $^1\text{H}$  NMR ( $\text{CDCl}_3$ ) of **9d**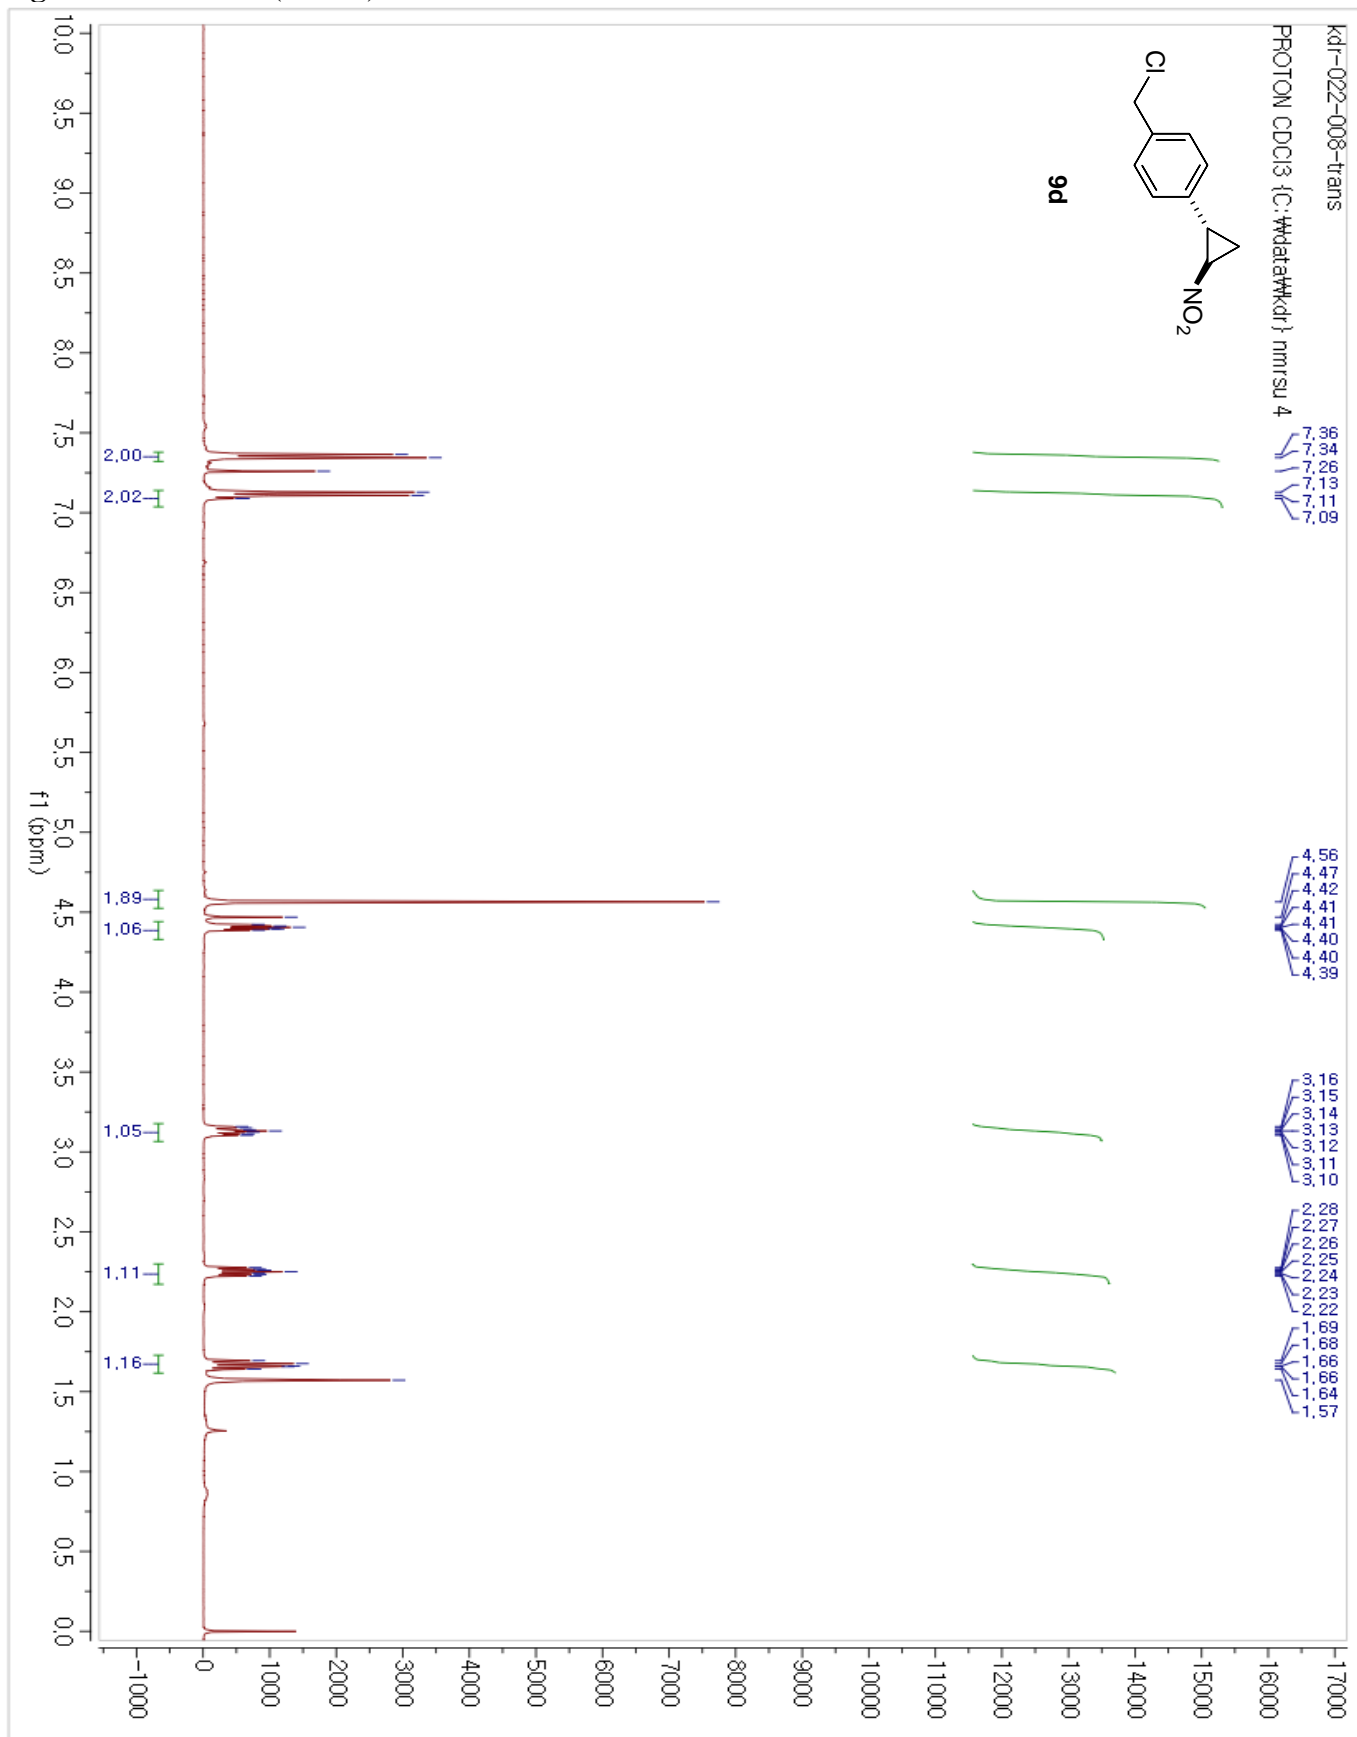

**Figure 36.**  $^{13}\text{C}$  NMR ( $\text{CDCl}_3$ ) of **9d**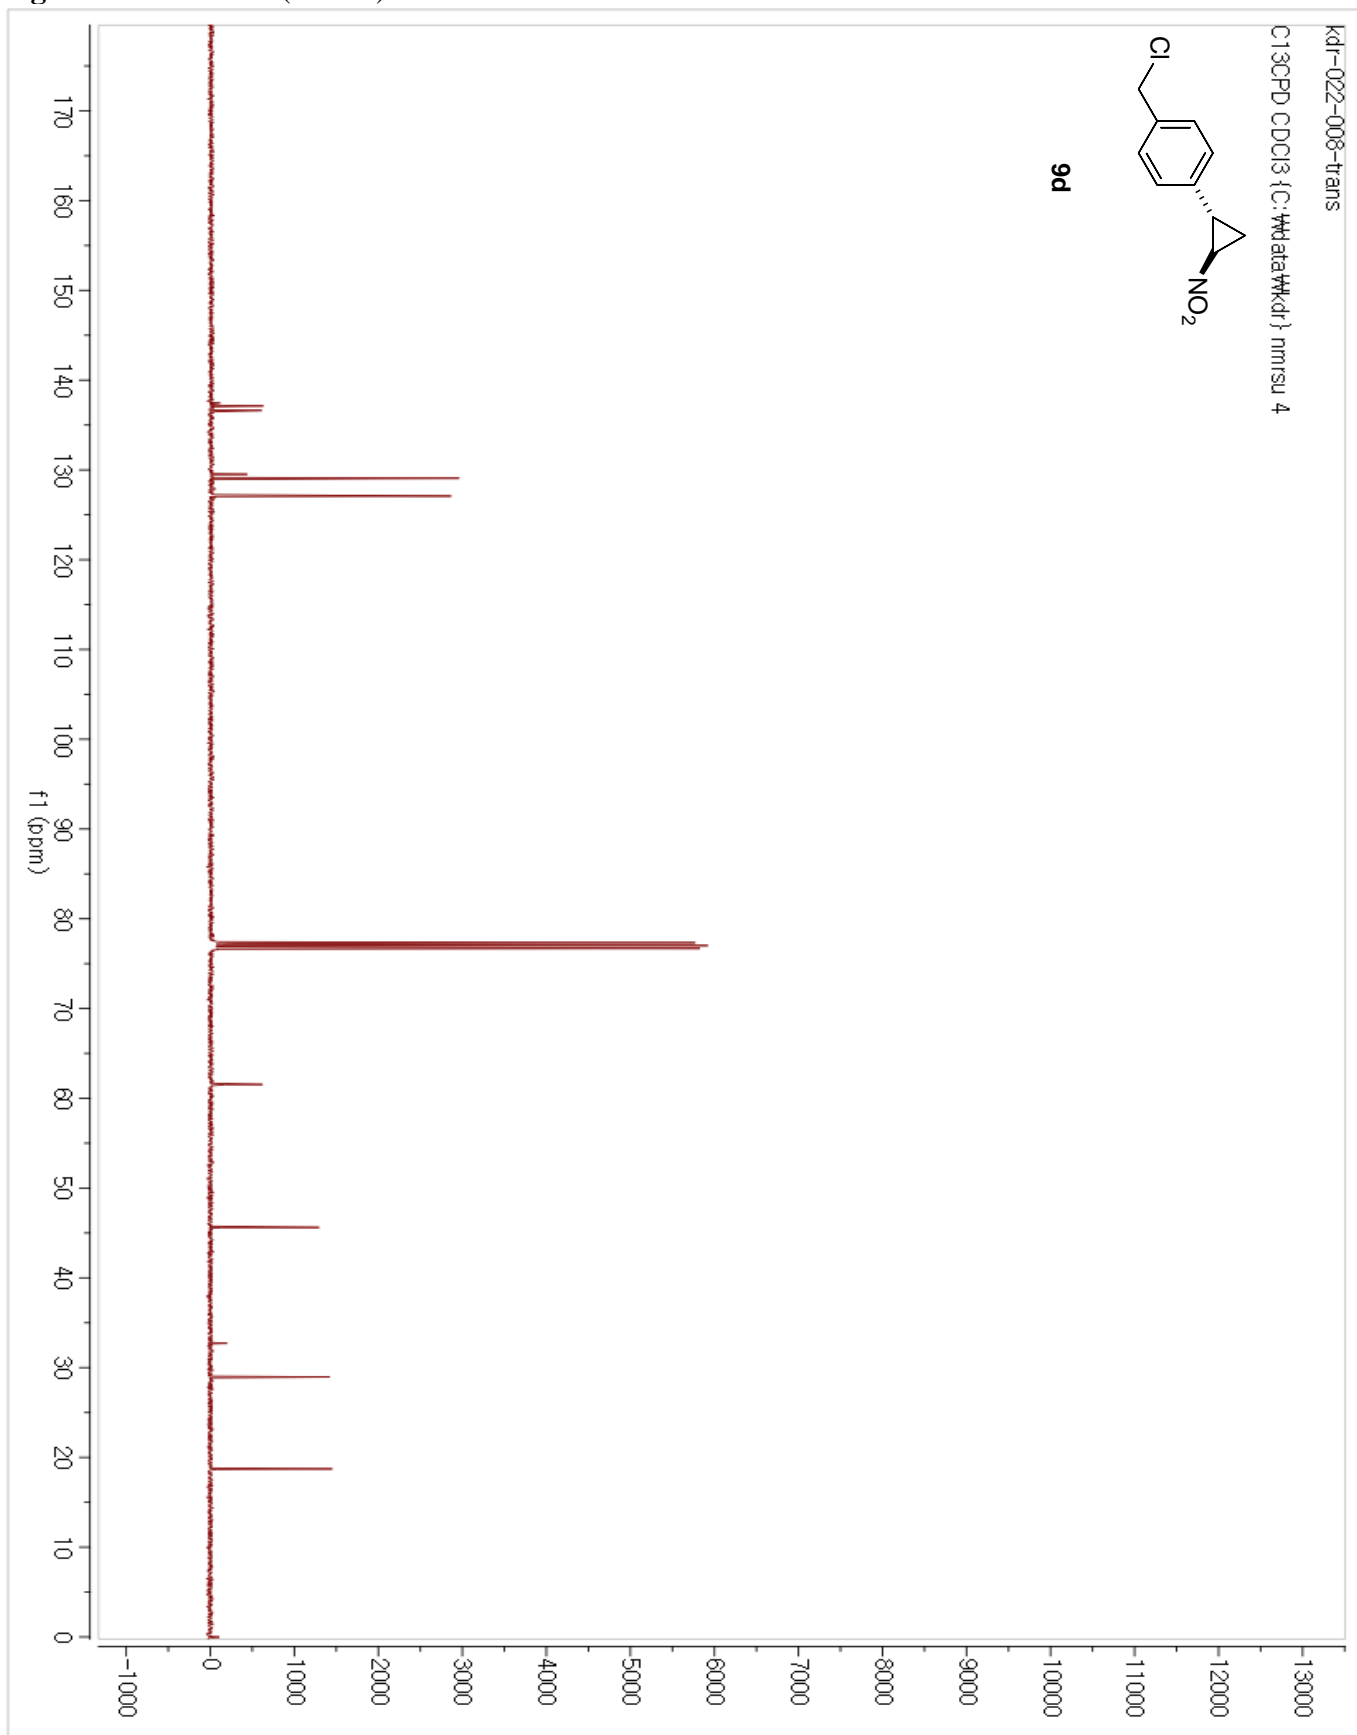

Figure 37.  $^1\text{H}$  NMR ( $\text{CDCl}_3$ ) of **9e**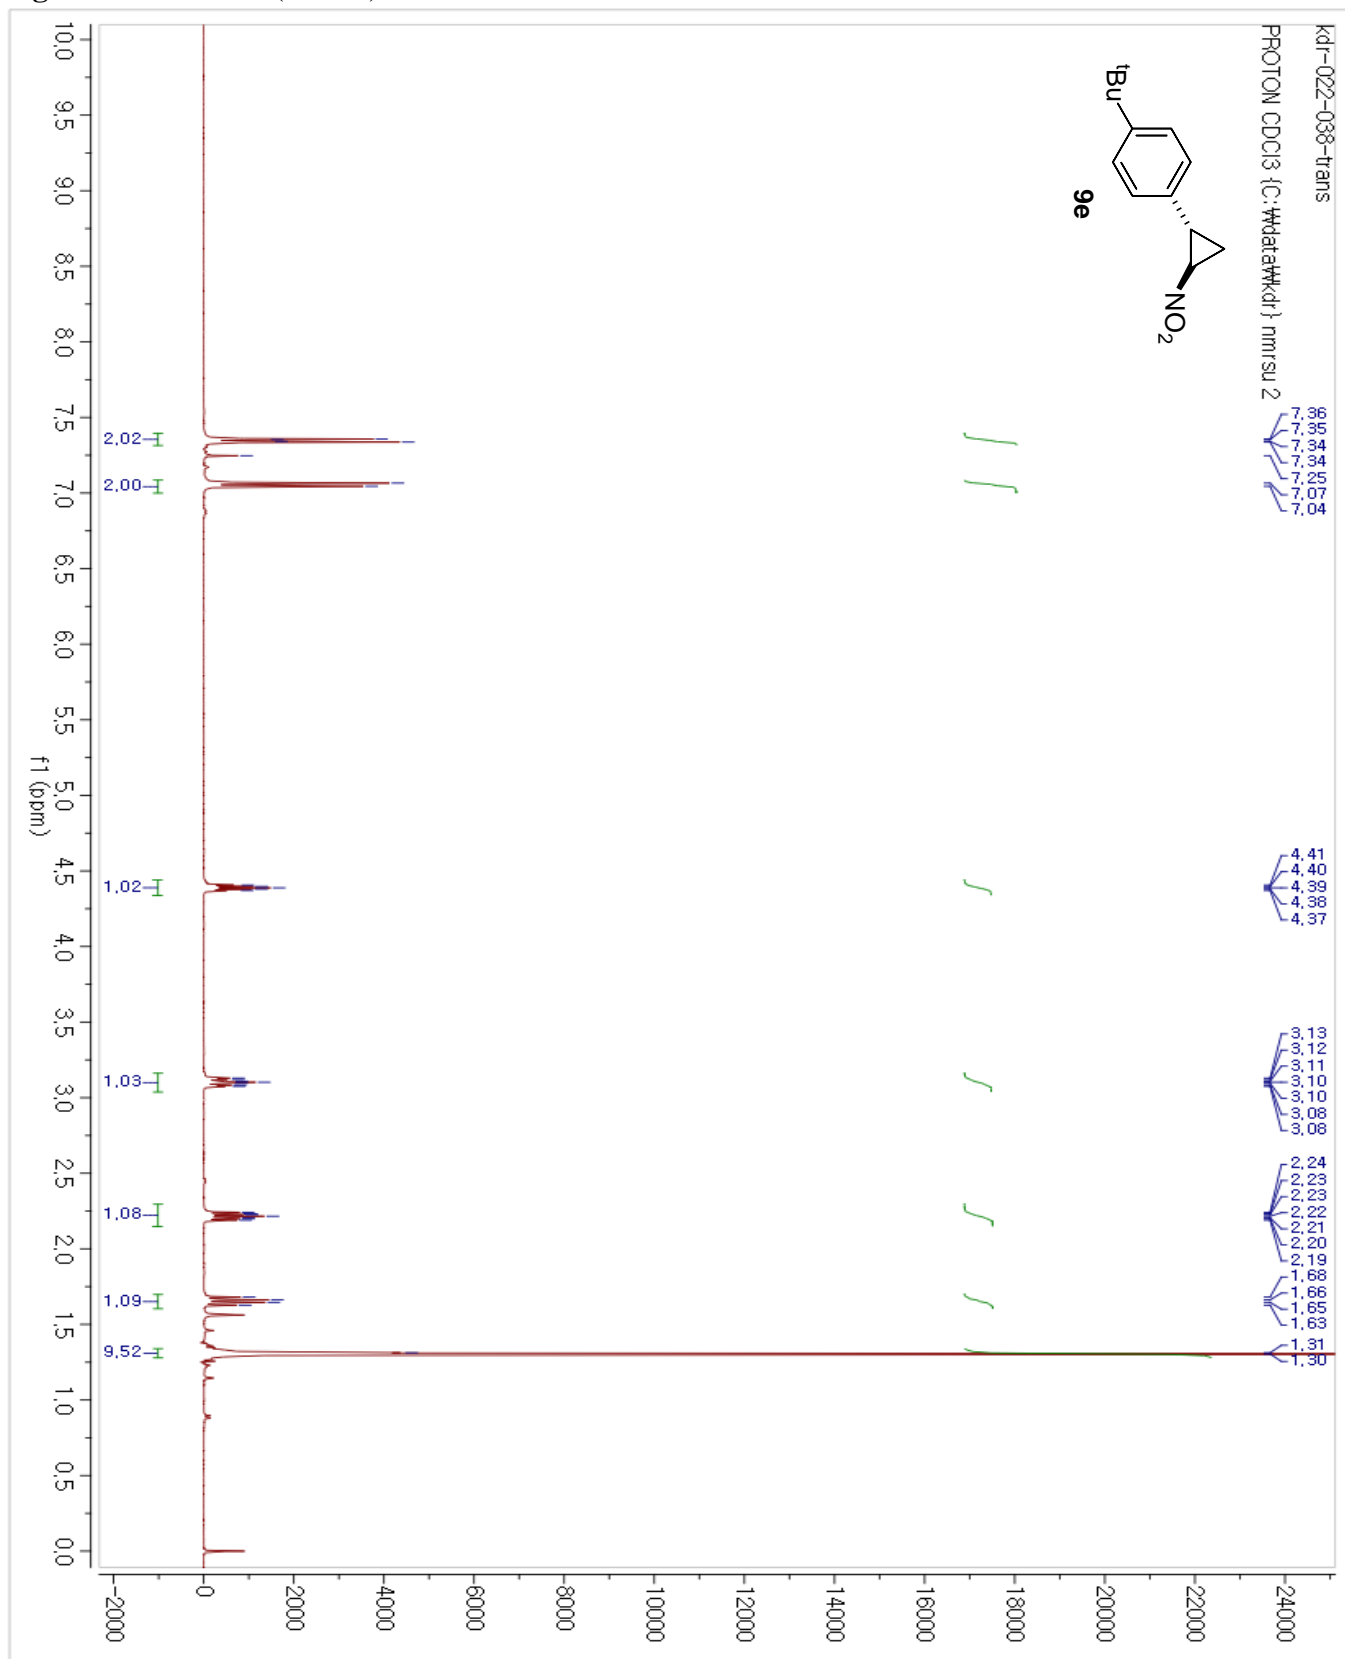

**Figure 38.**  $^{13}\text{C}$  NMR ( $\text{CDCl}_3$ ) of **9e**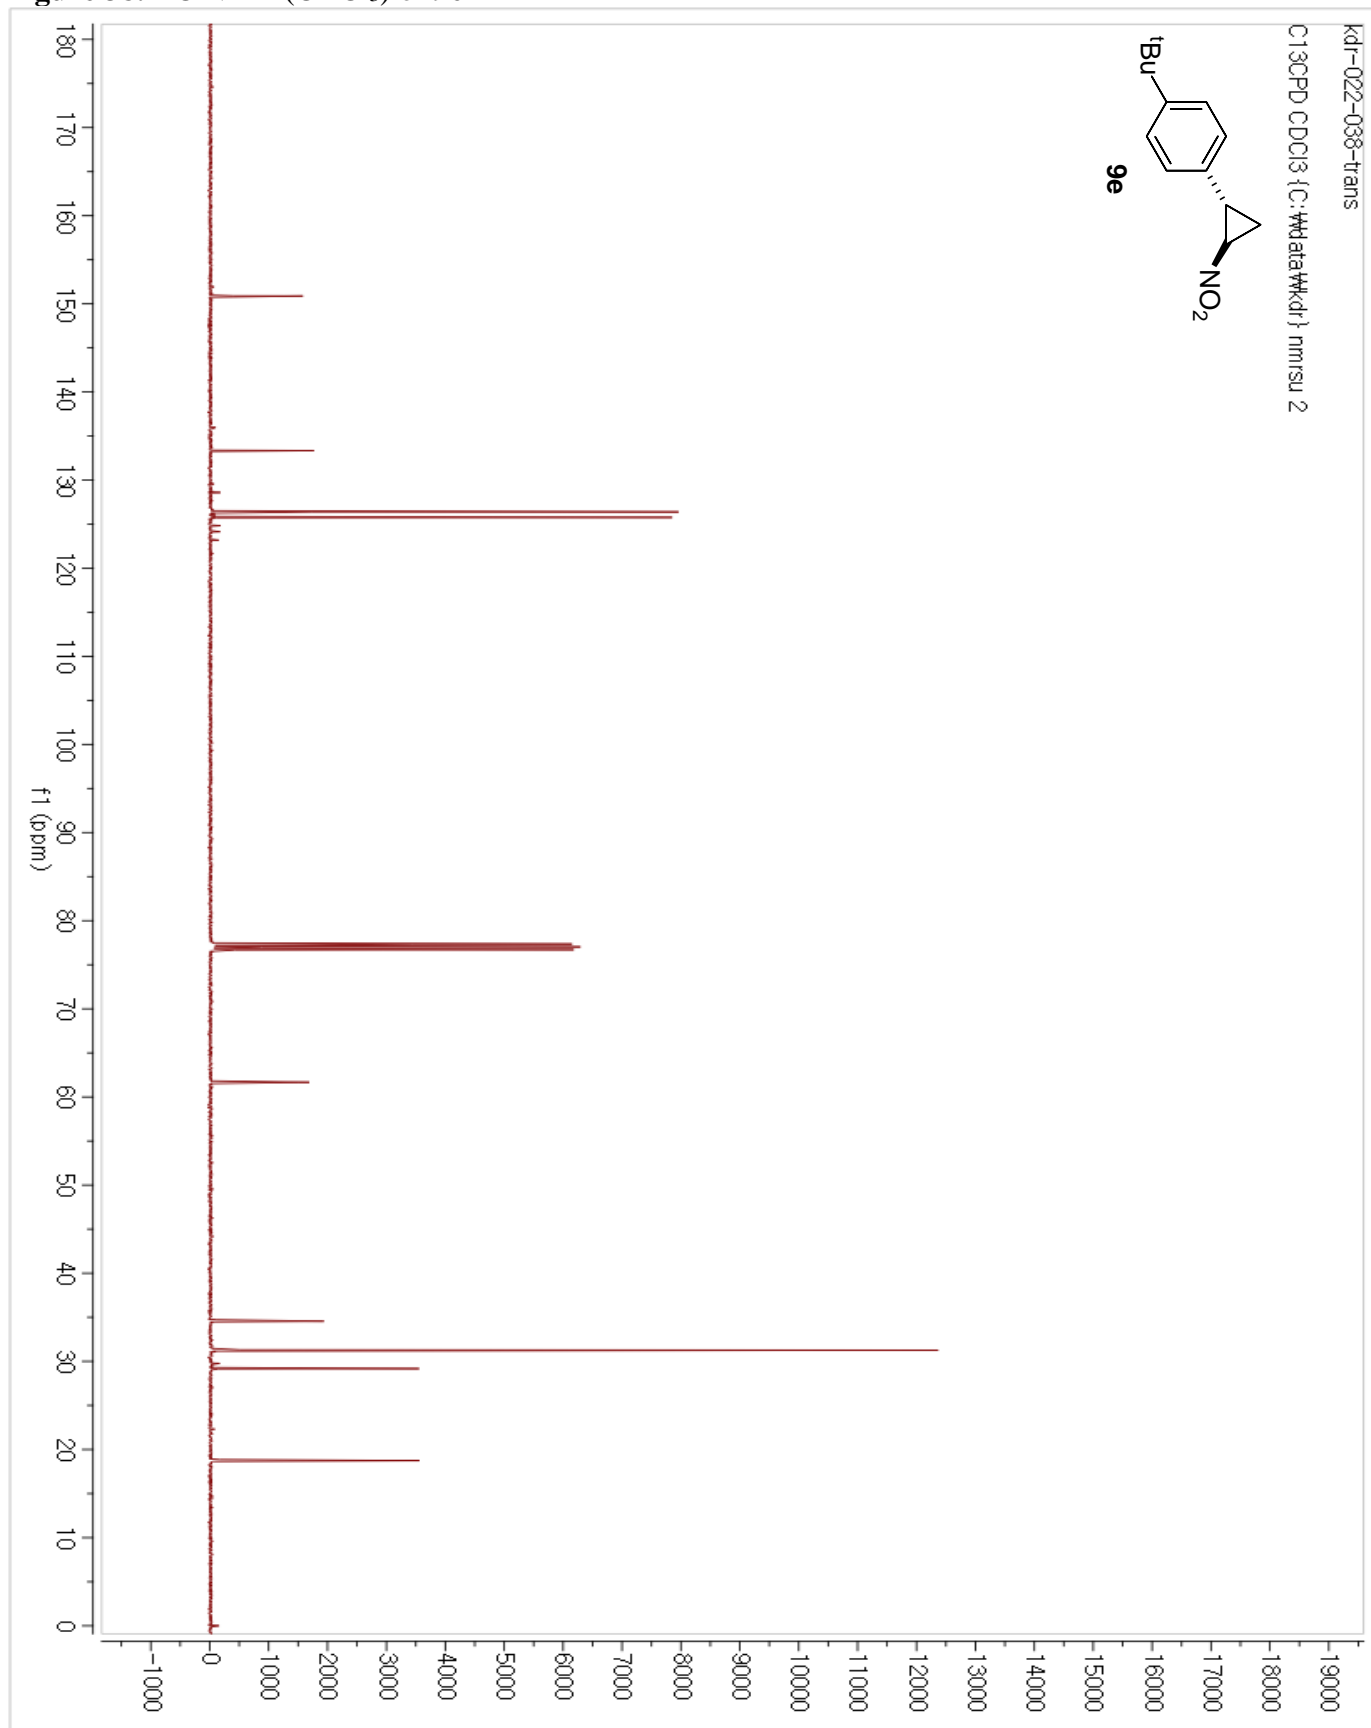

Figure 39.  $^1\text{H}$  NMR (MeOD) of **9f**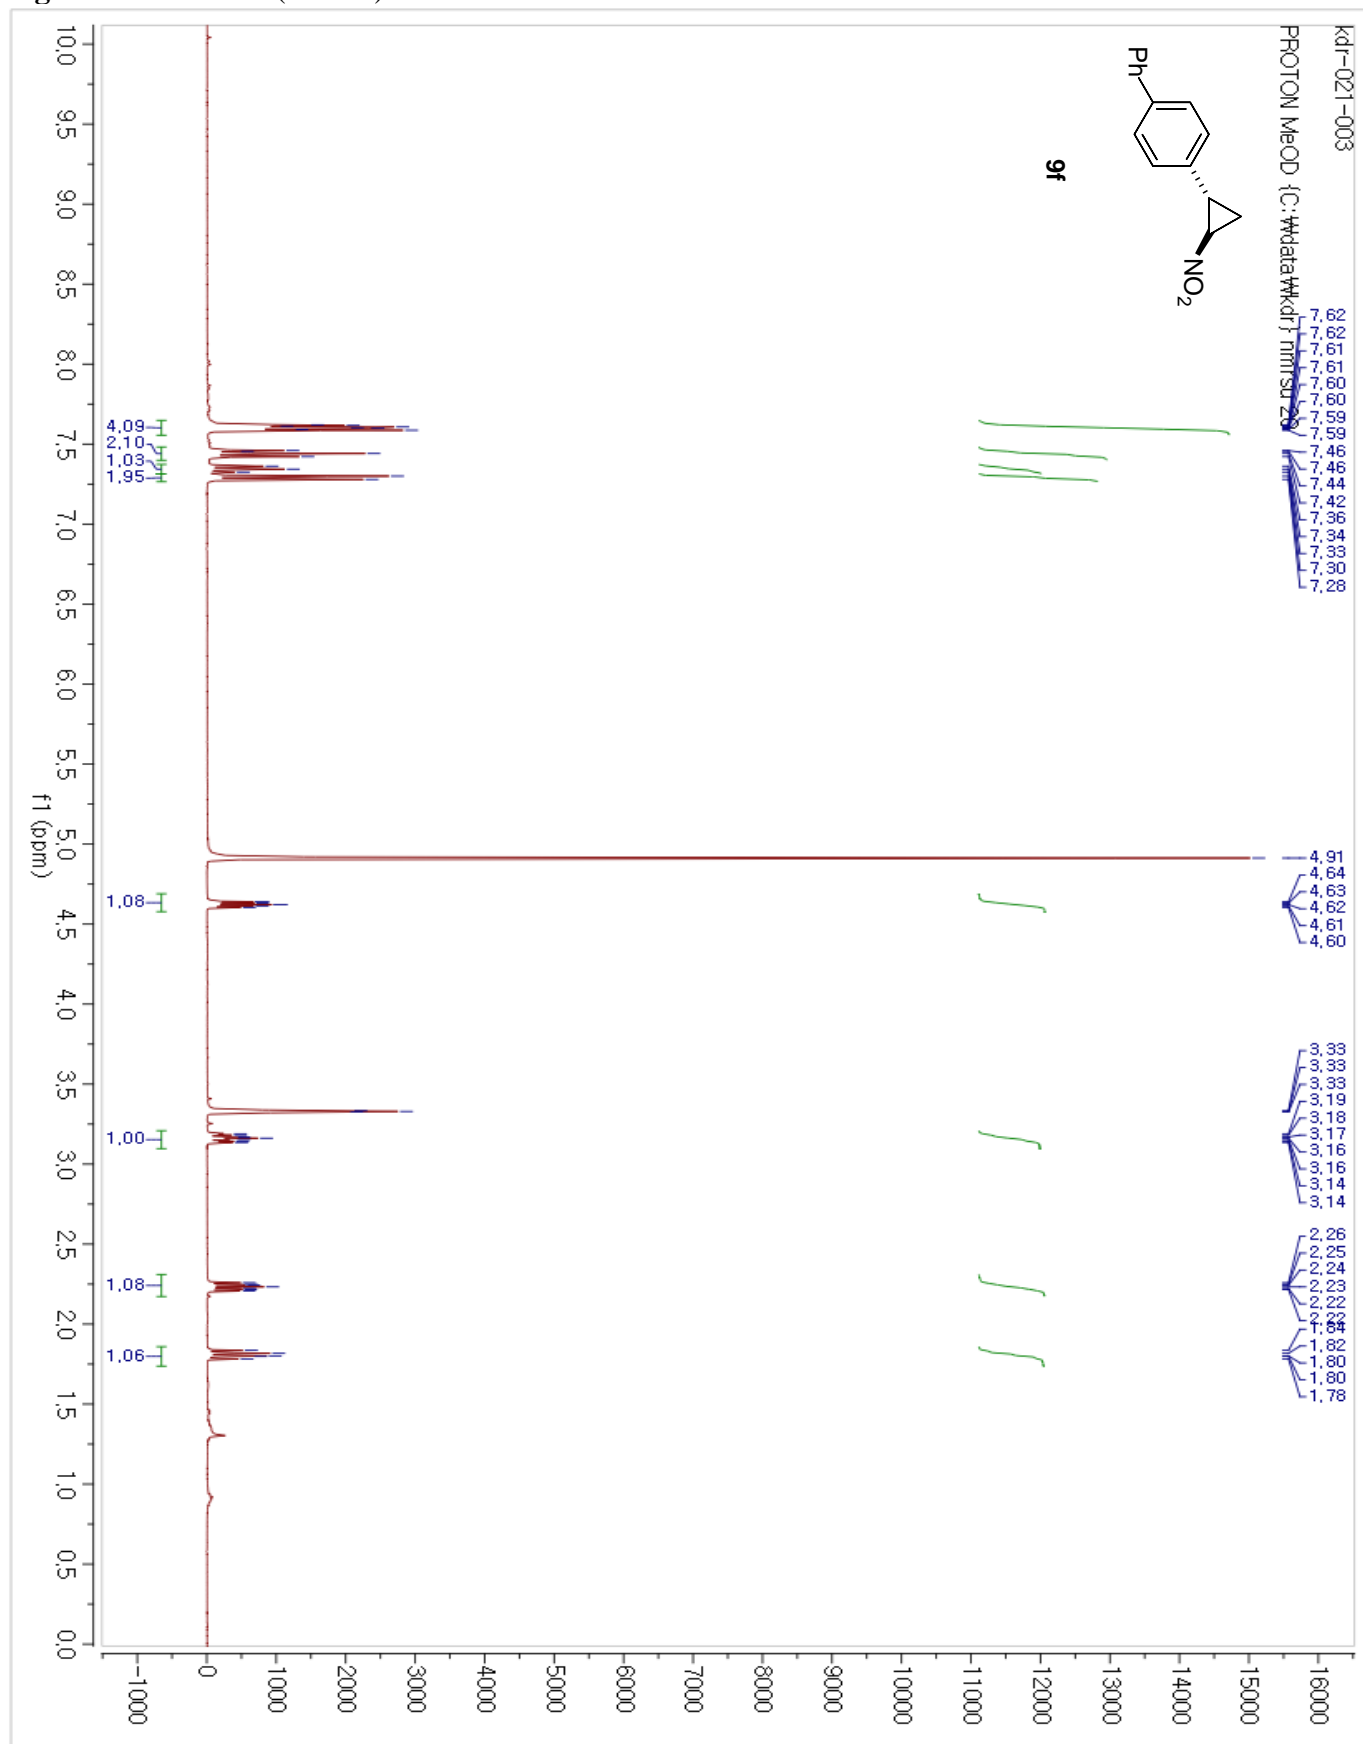

**Figure 40.**  $^{13}\text{C}$  NMR (MeOD) of **9f**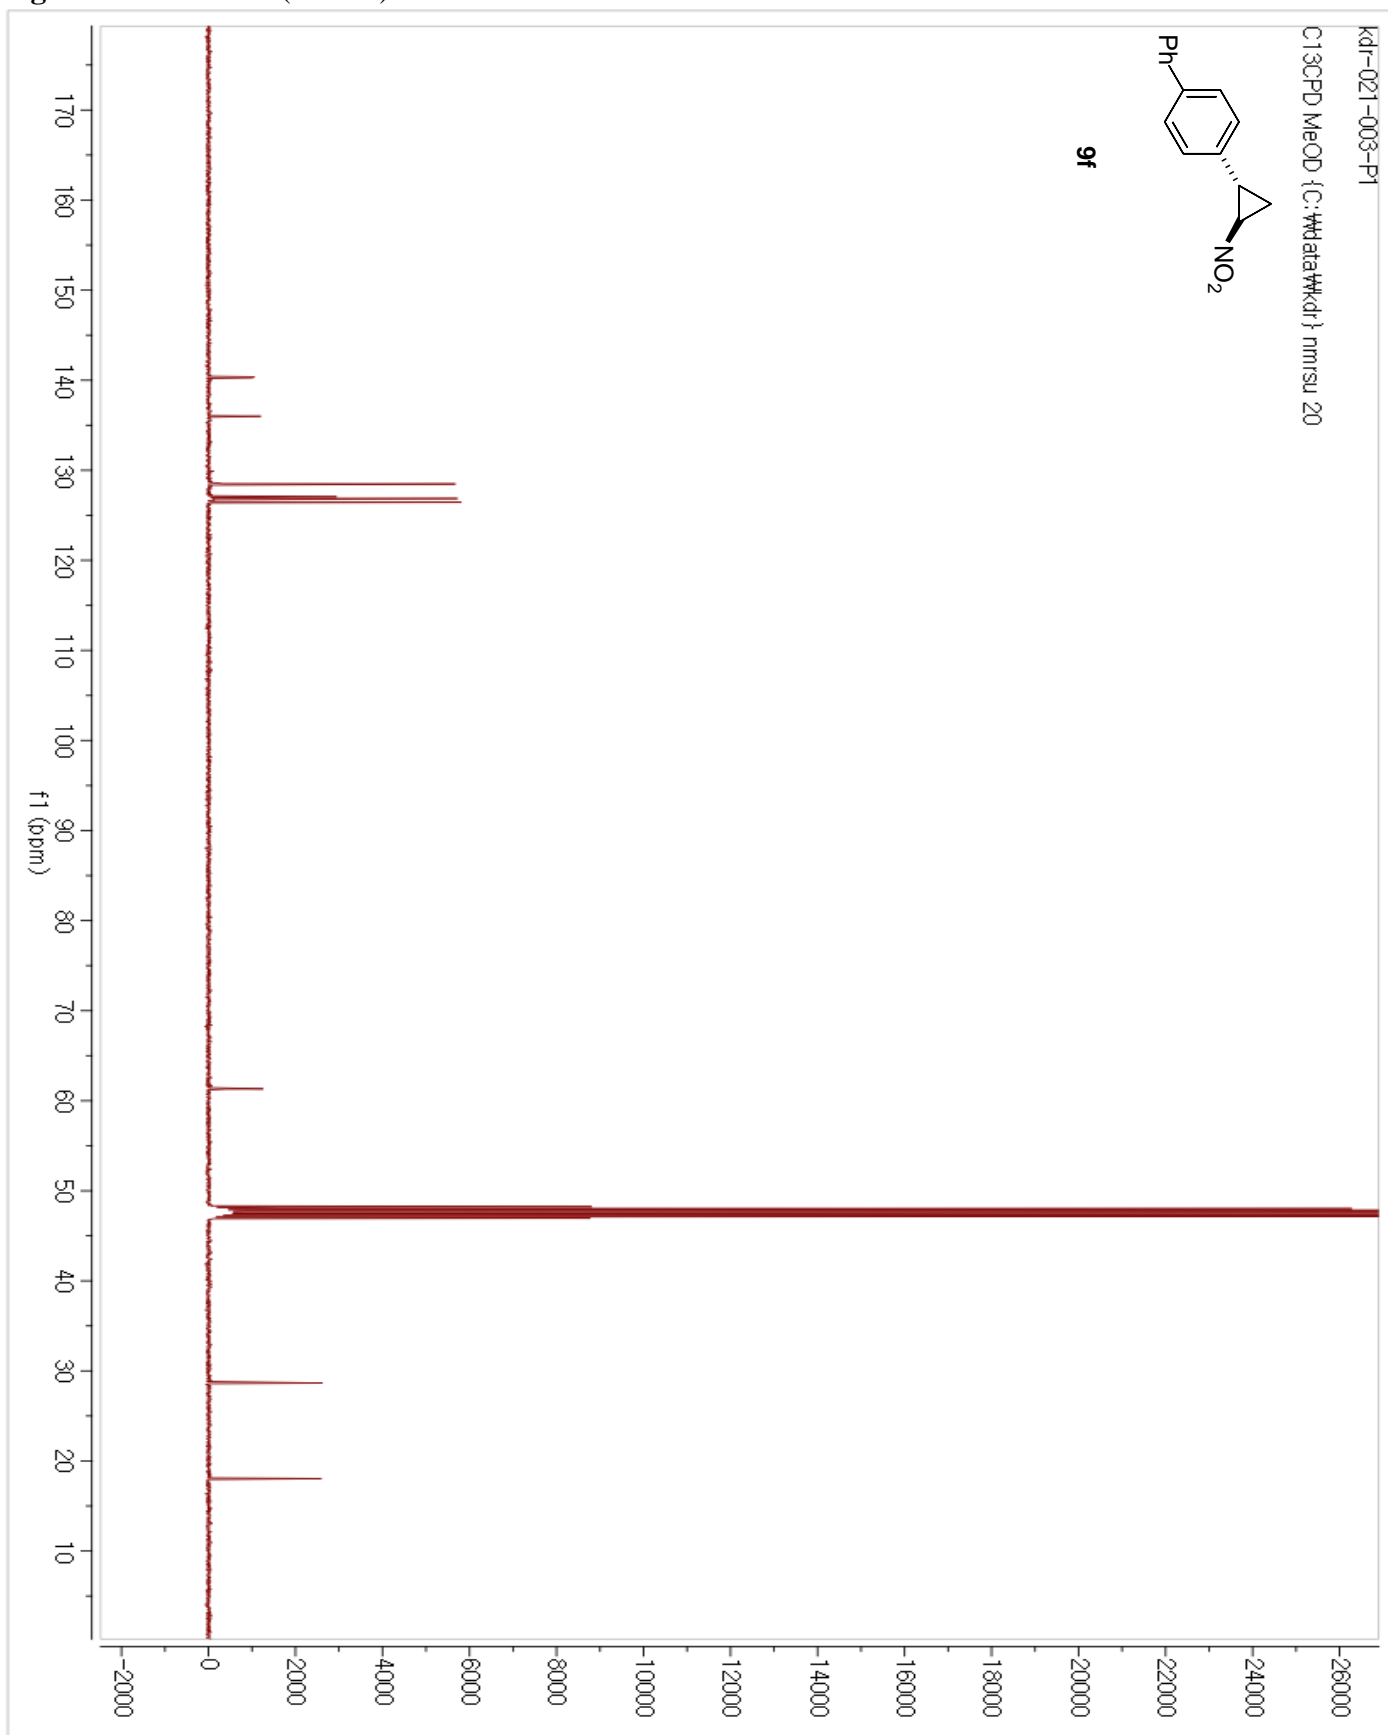



Figure 41.  $^1\text{H}$  NMR ( $\text{CDCl}_3$ ) of **9g**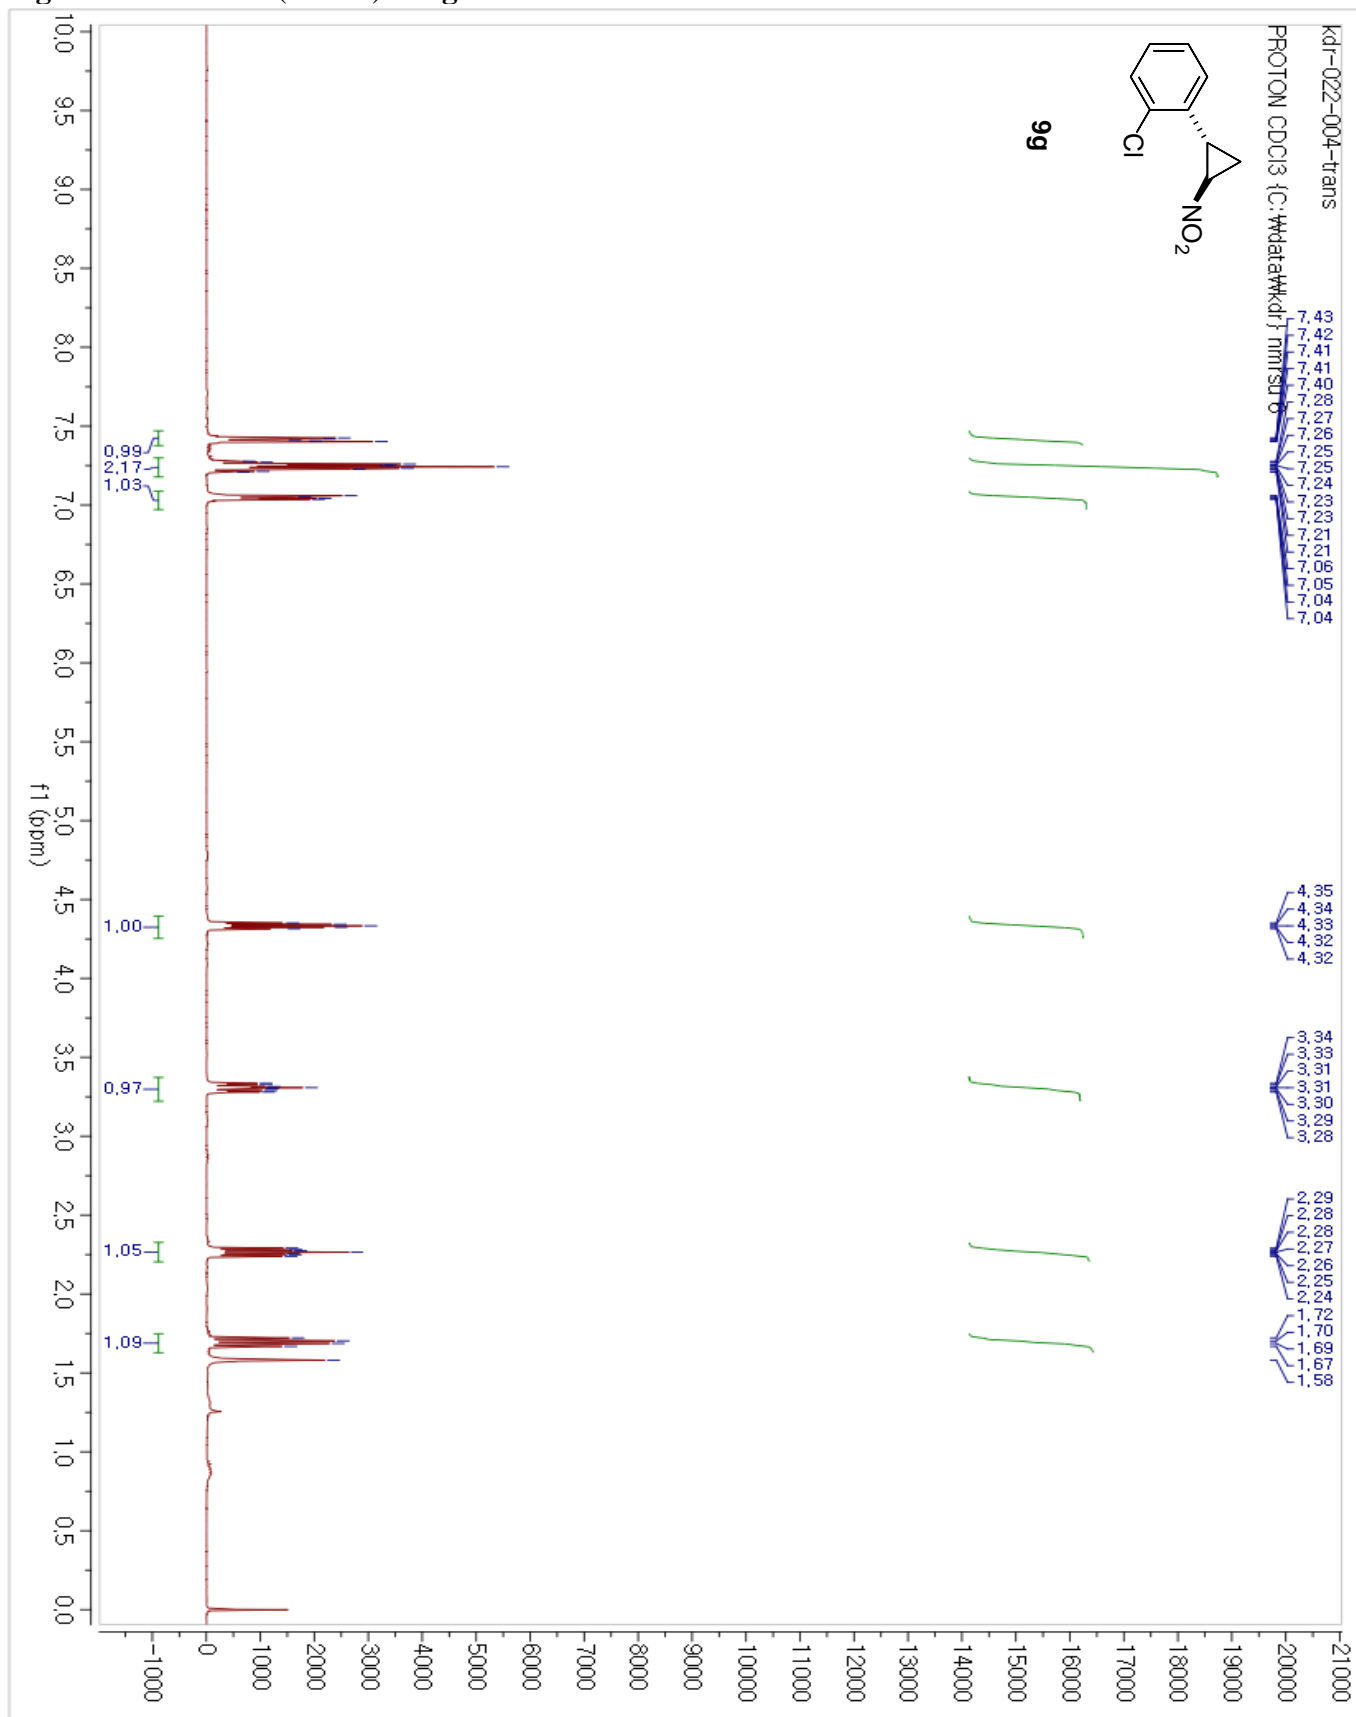

**Figure 42.**  $^{13}\text{C}$  NMR ( $\text{CDCl}_3$ ) of **9g**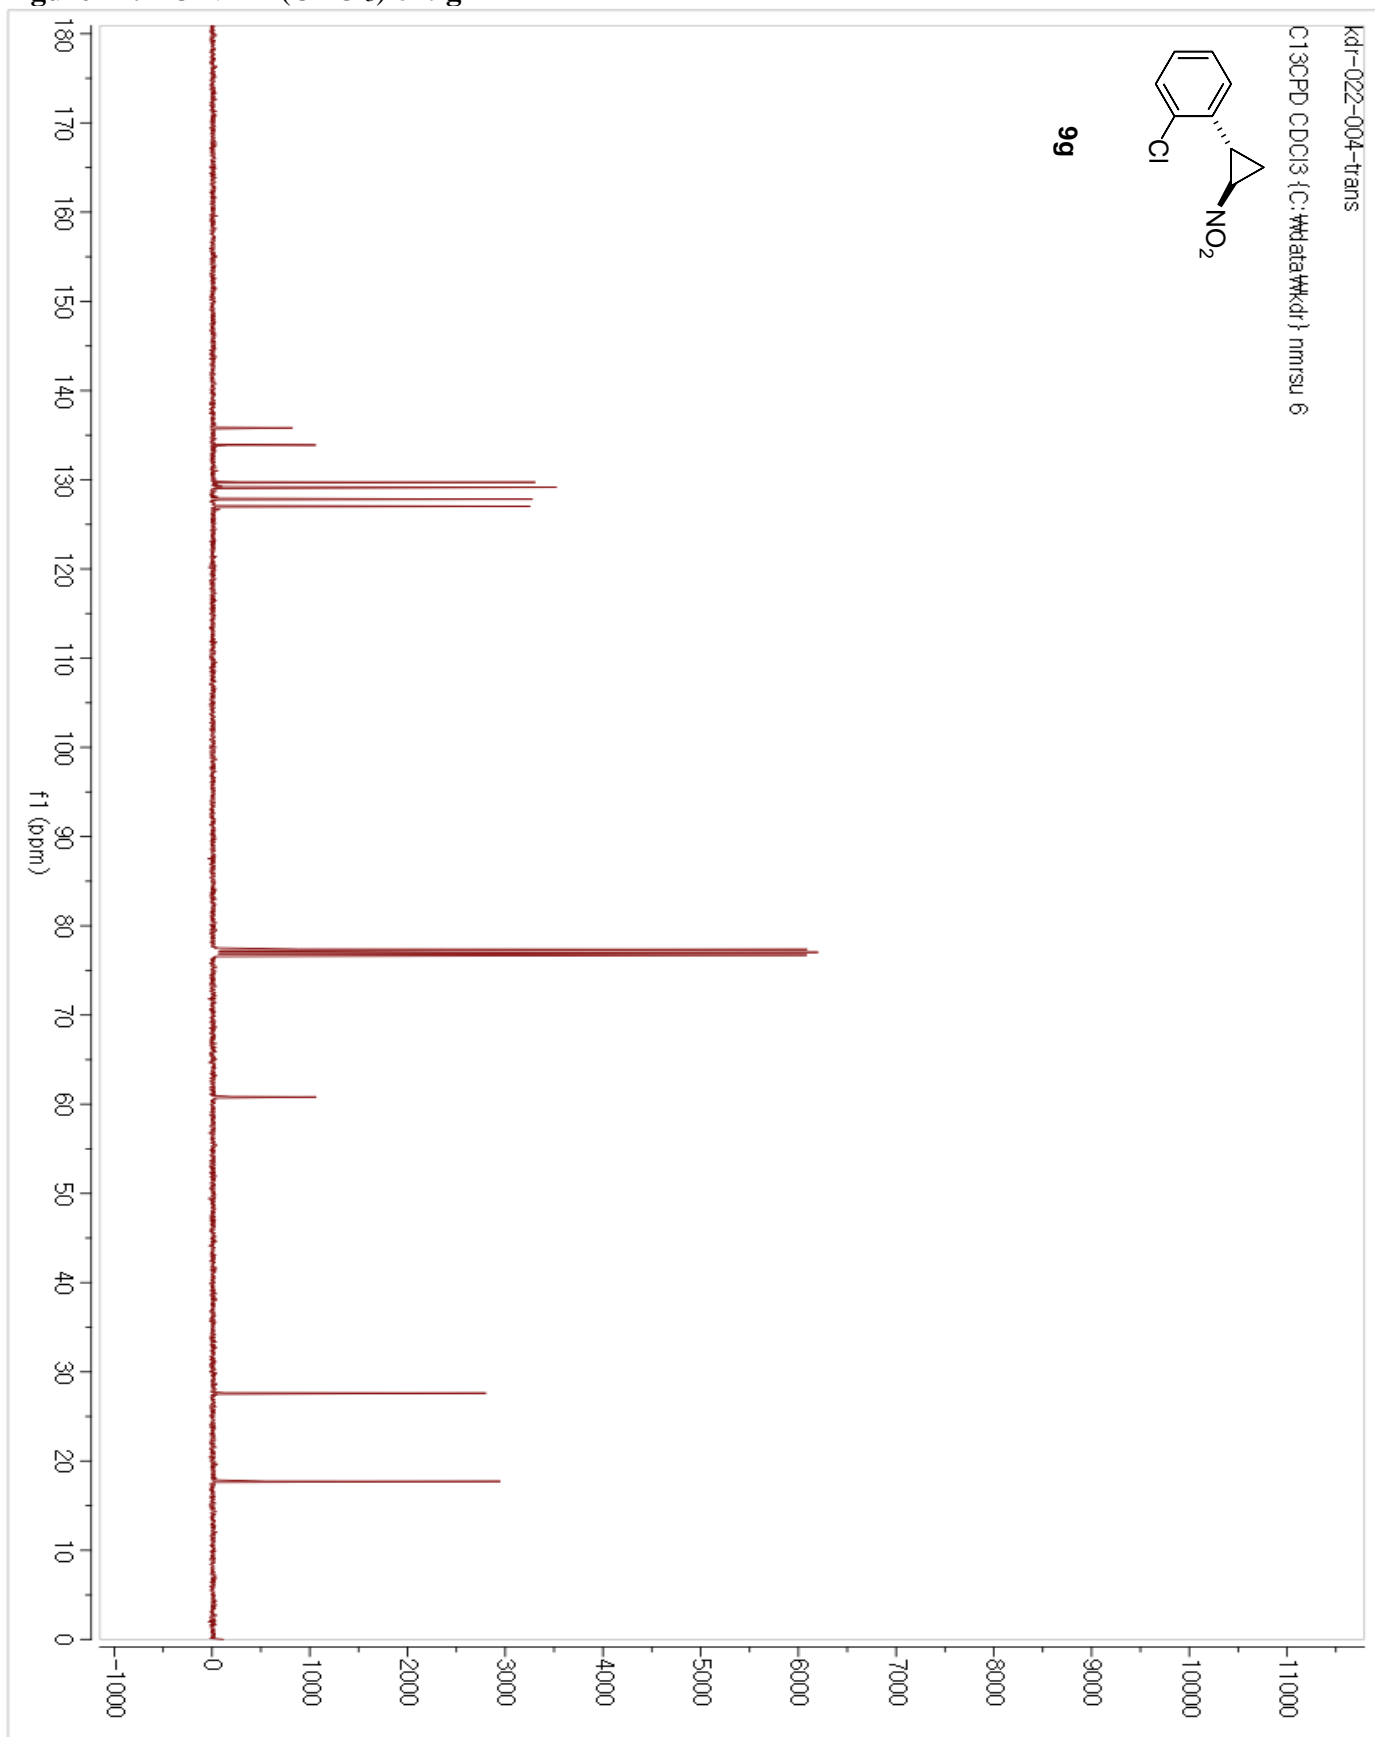



**Figure 44.**  $^{13}\text{C}$  NMR ( $\text{CDCl}_3$ ) of **9h**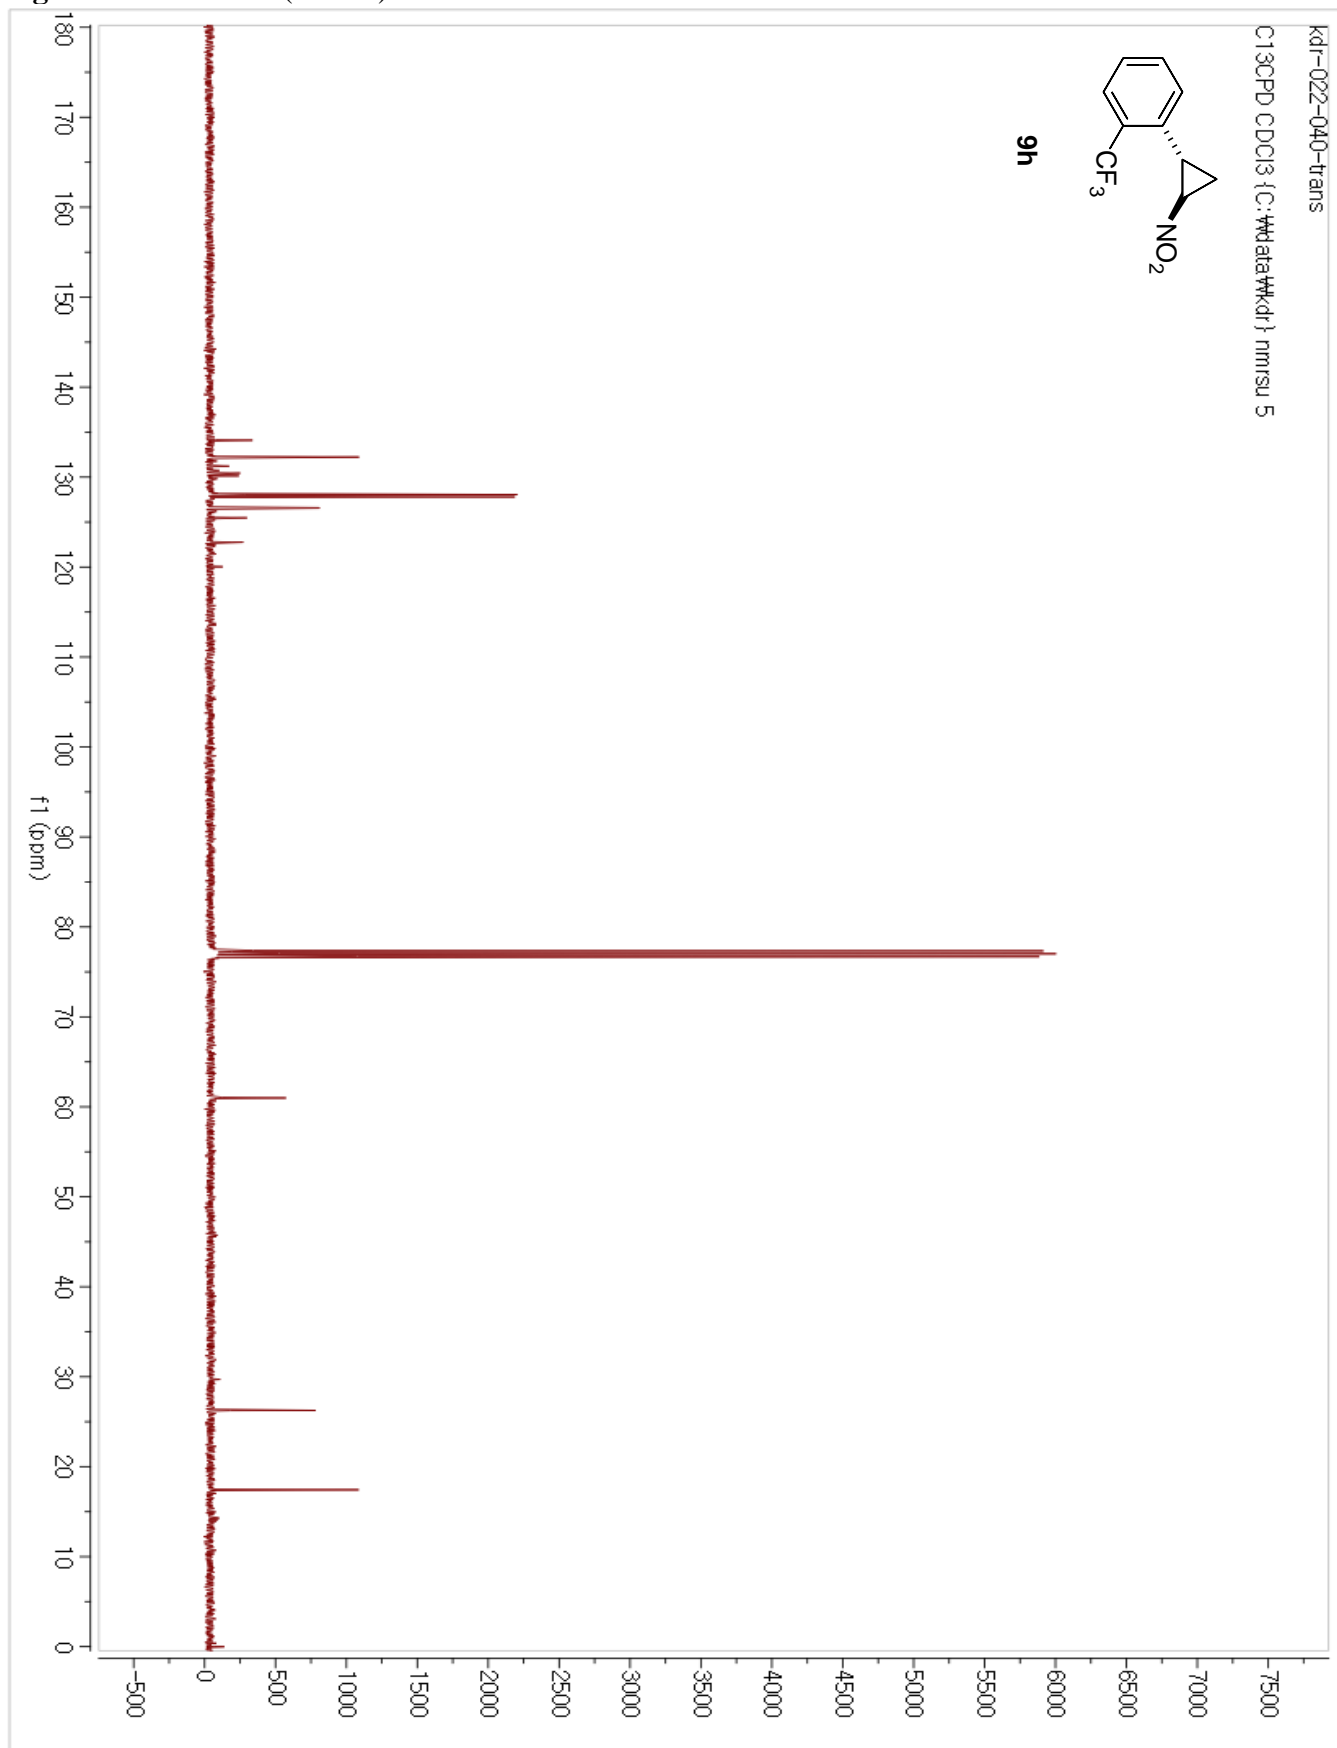

**Figure 45.**  $^{19}\text{F}$  NMR ( $\text{CDCl}_3$ ) of **9h**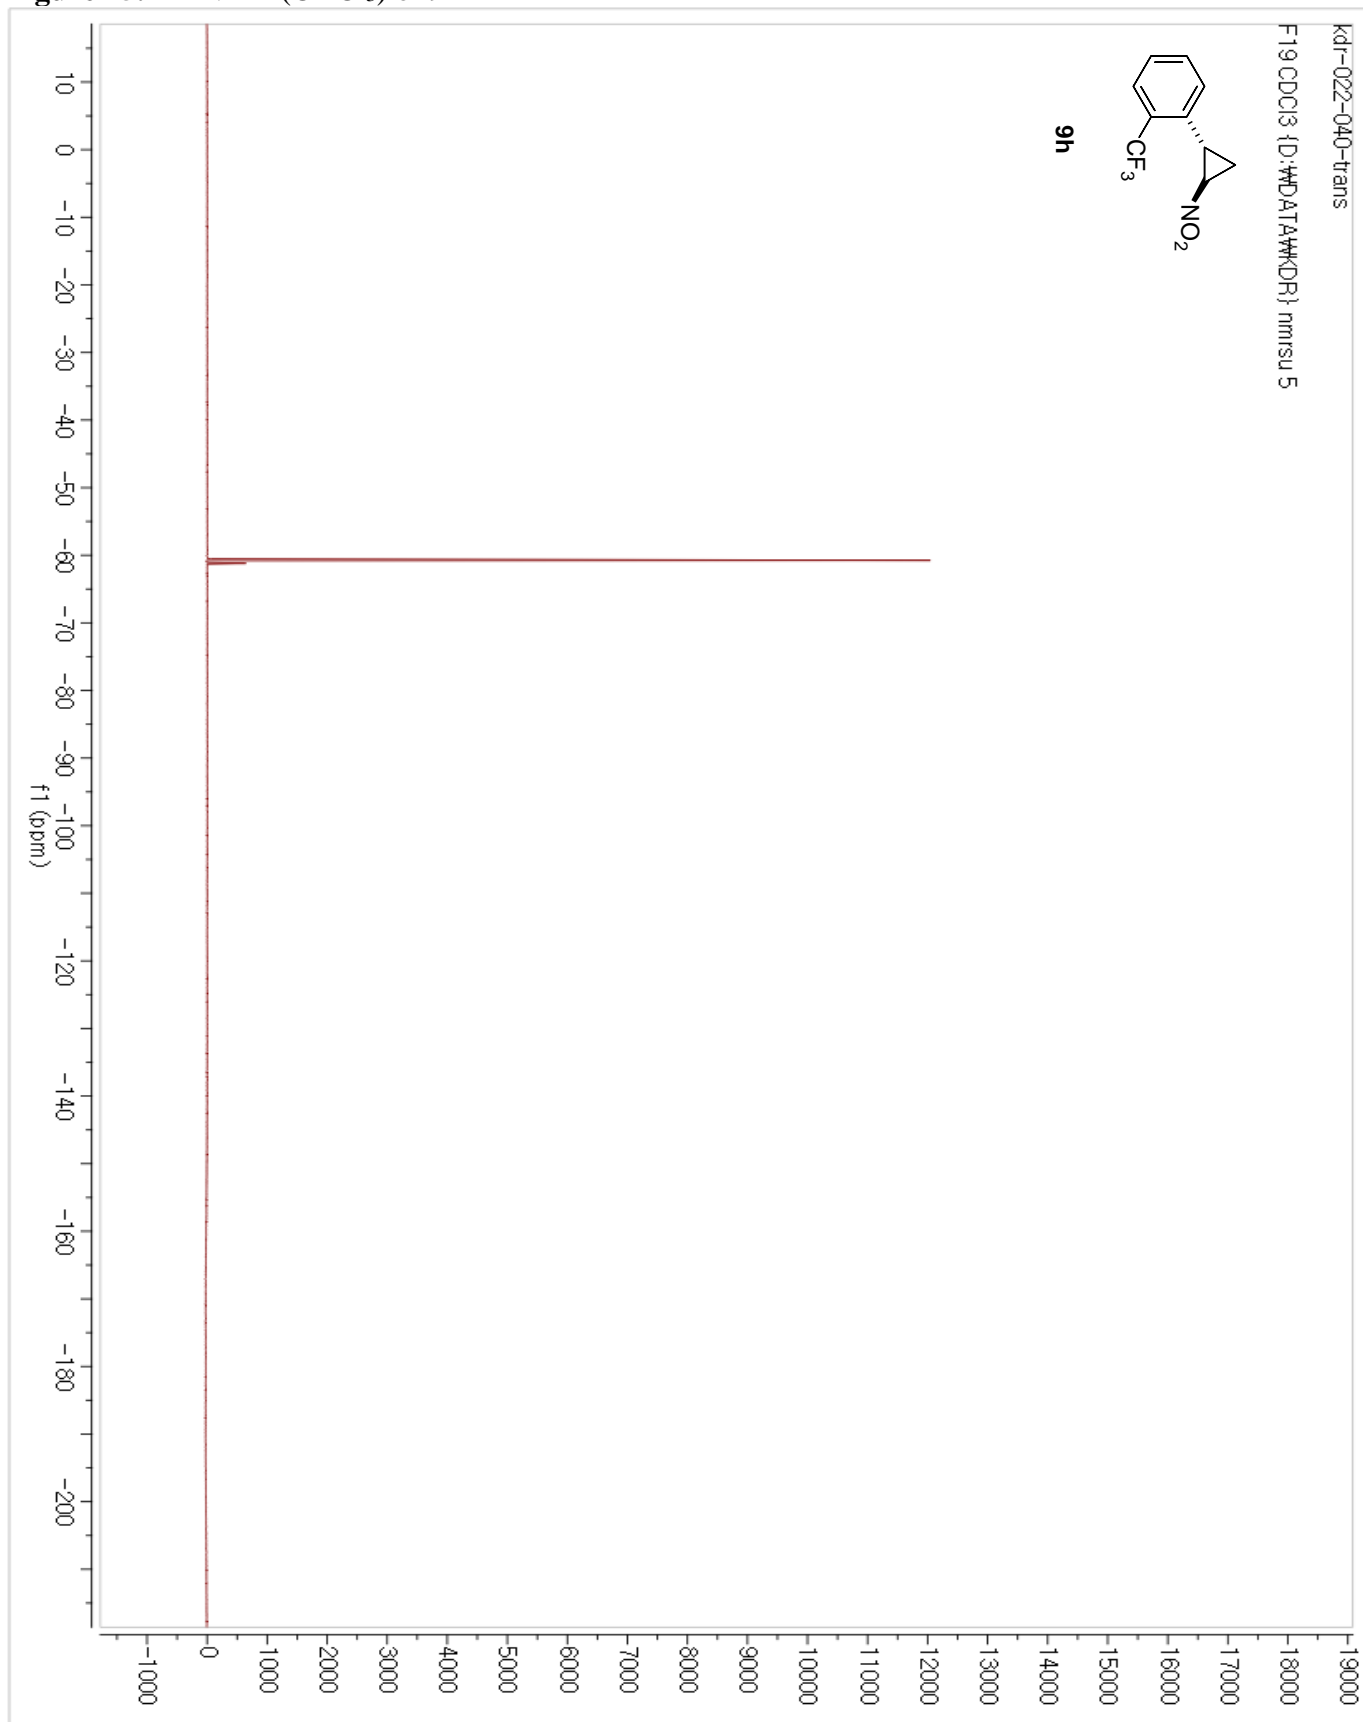

**Figure 46.**  $^1\text{H}$  NMR ( $\text{CDCl}_3$ ) of **9i**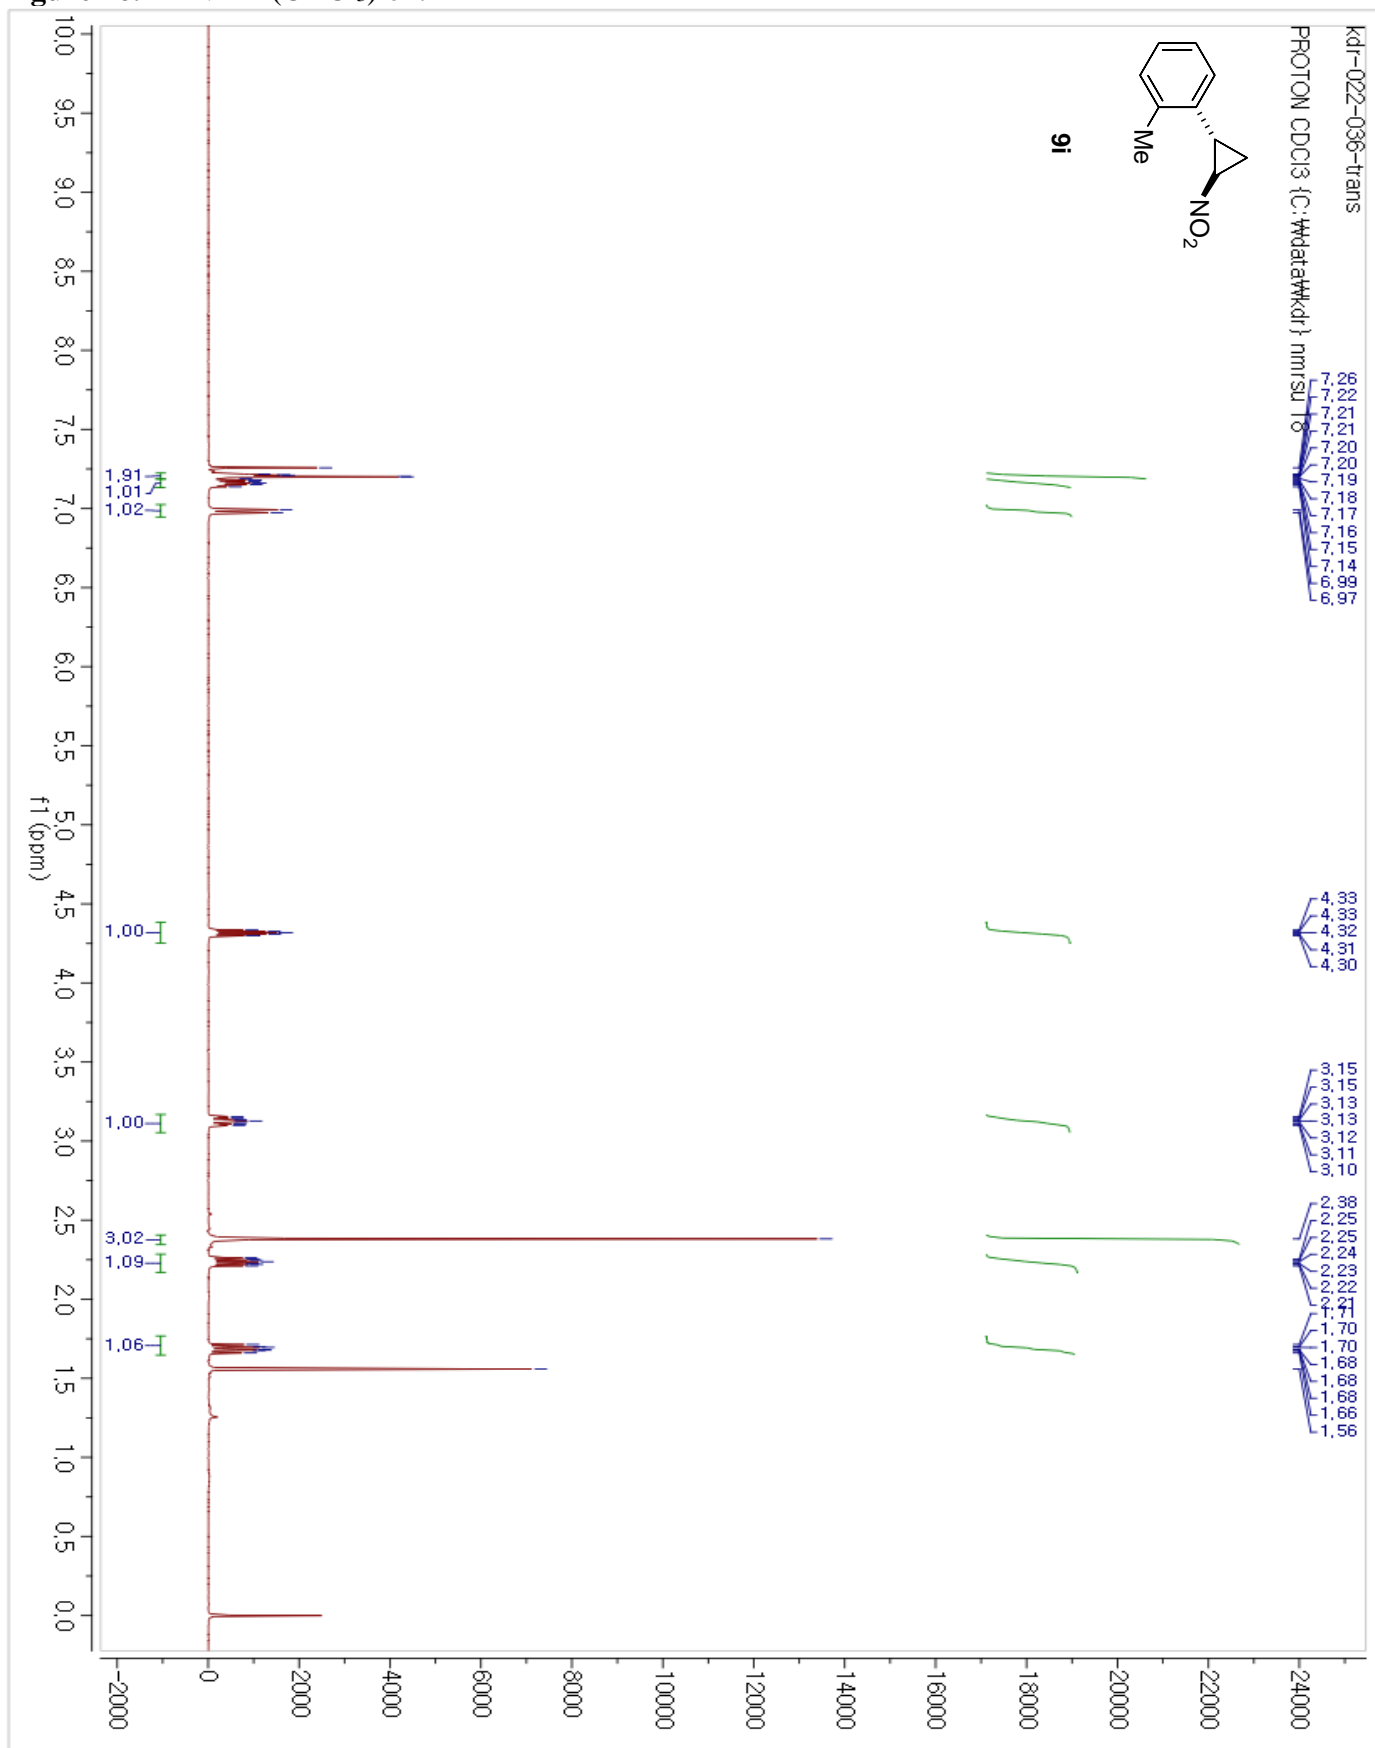

**Figure 47.**  $^{13}\text{C}$  NMR ( $\text{CDCl}_3$ ) of **9i**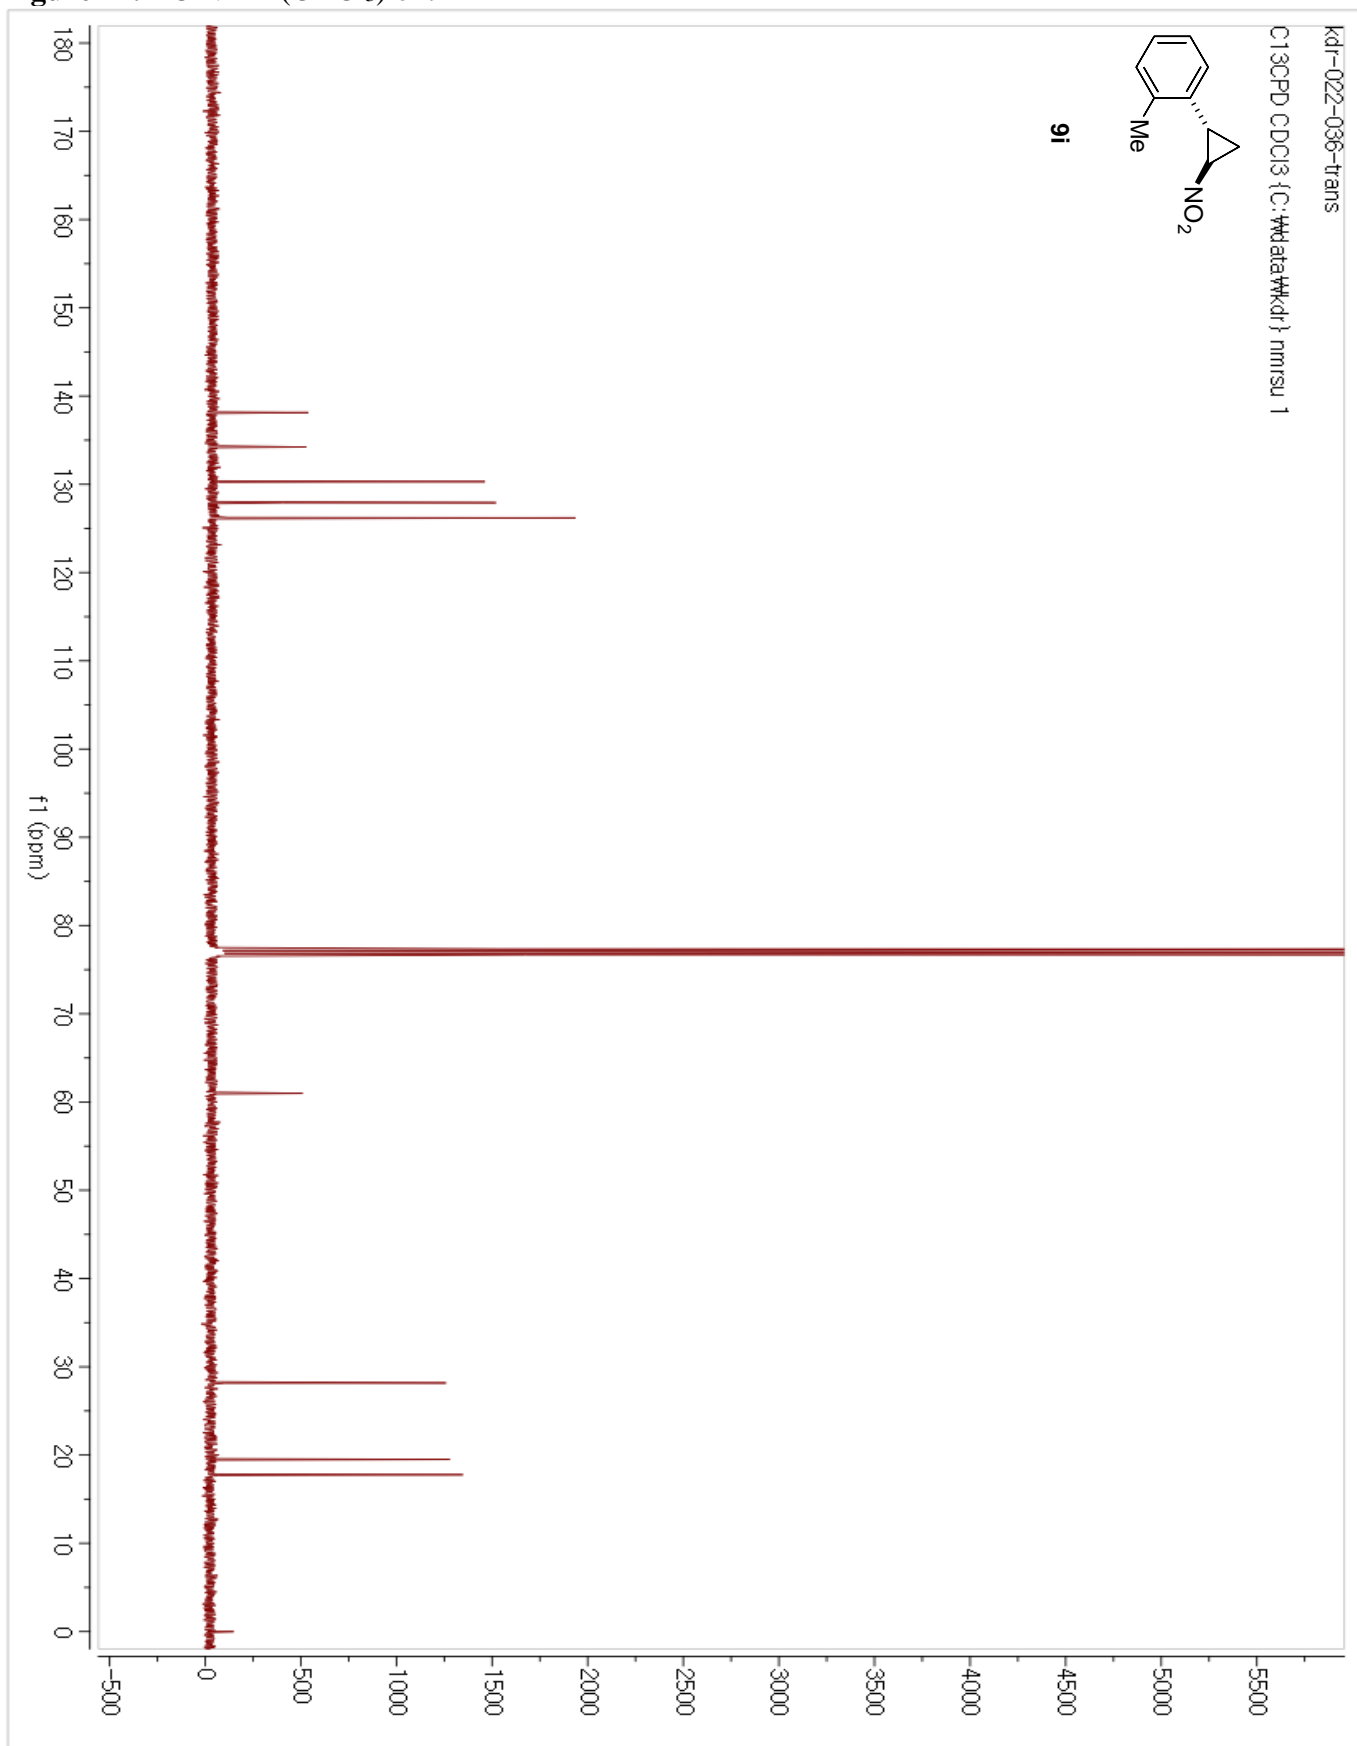

Figure 48.  $^1\text{H}$  NMR ( $\text{CDCl}_3$ ) of **9j**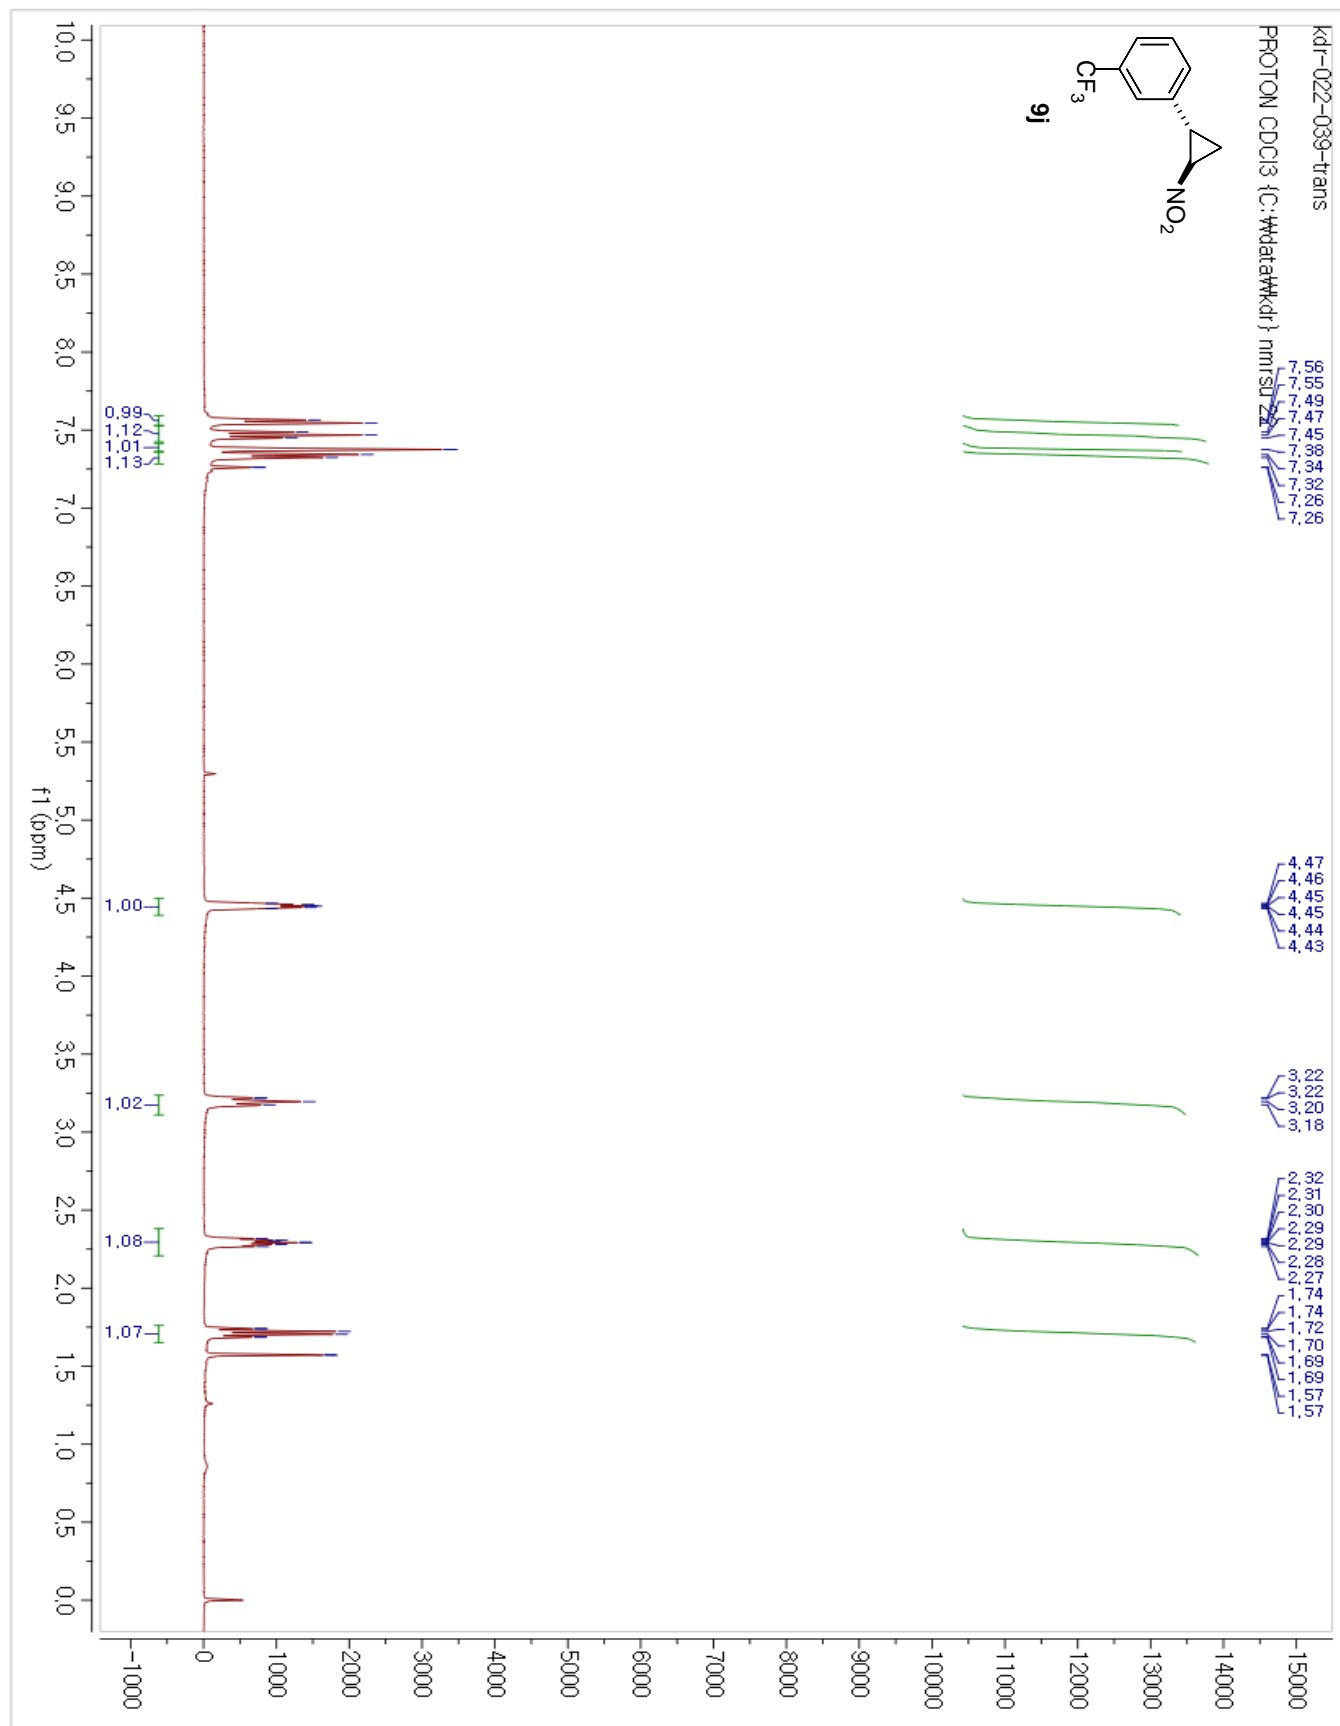



**Figure 49.**  $^{13}\text{C}$  NMR ( $\text{CDCl}_3$ ) of **9j**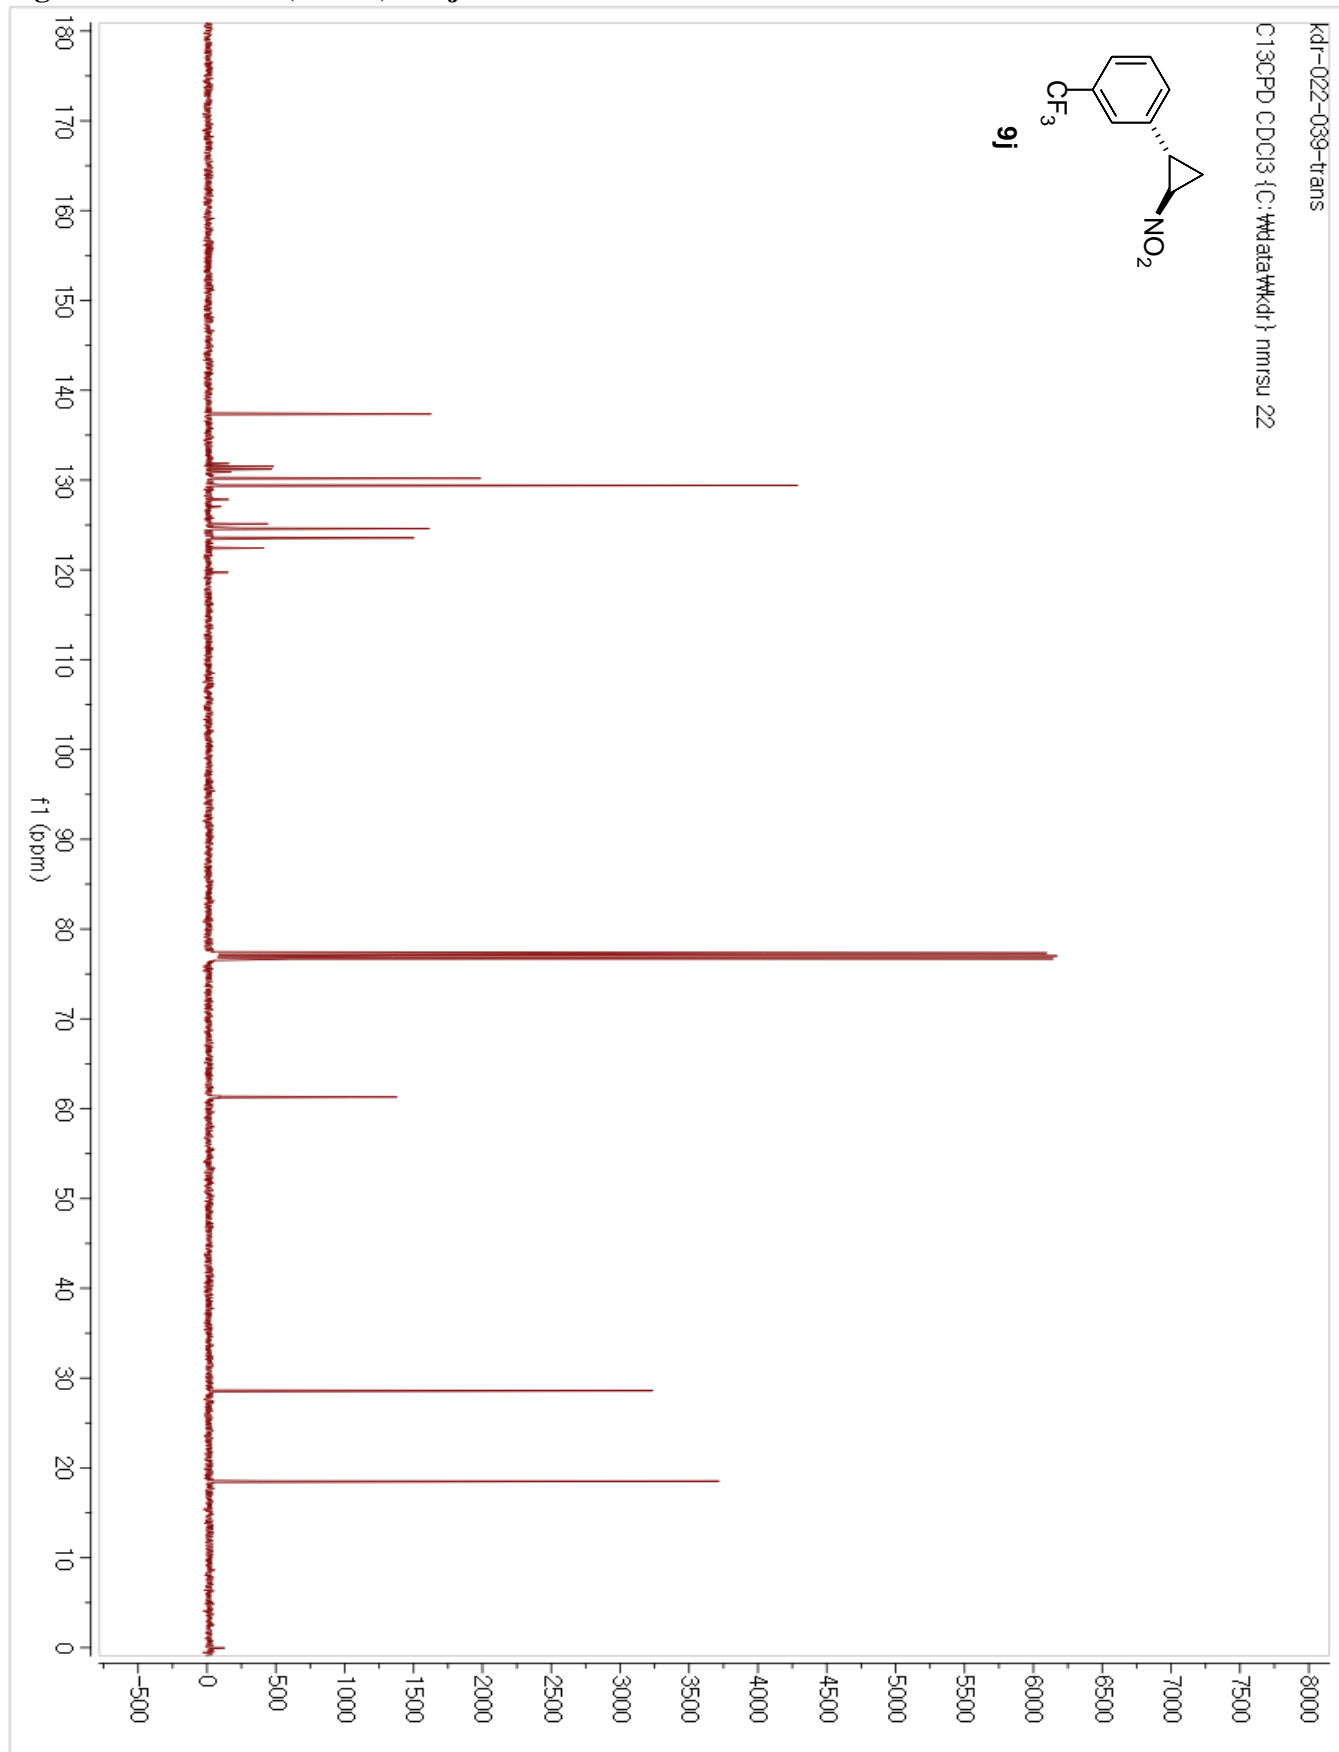

**Figure 50.**  $^{19}\text{F}$  NMR ( $\text{CDCl}_3$ ) of **9j**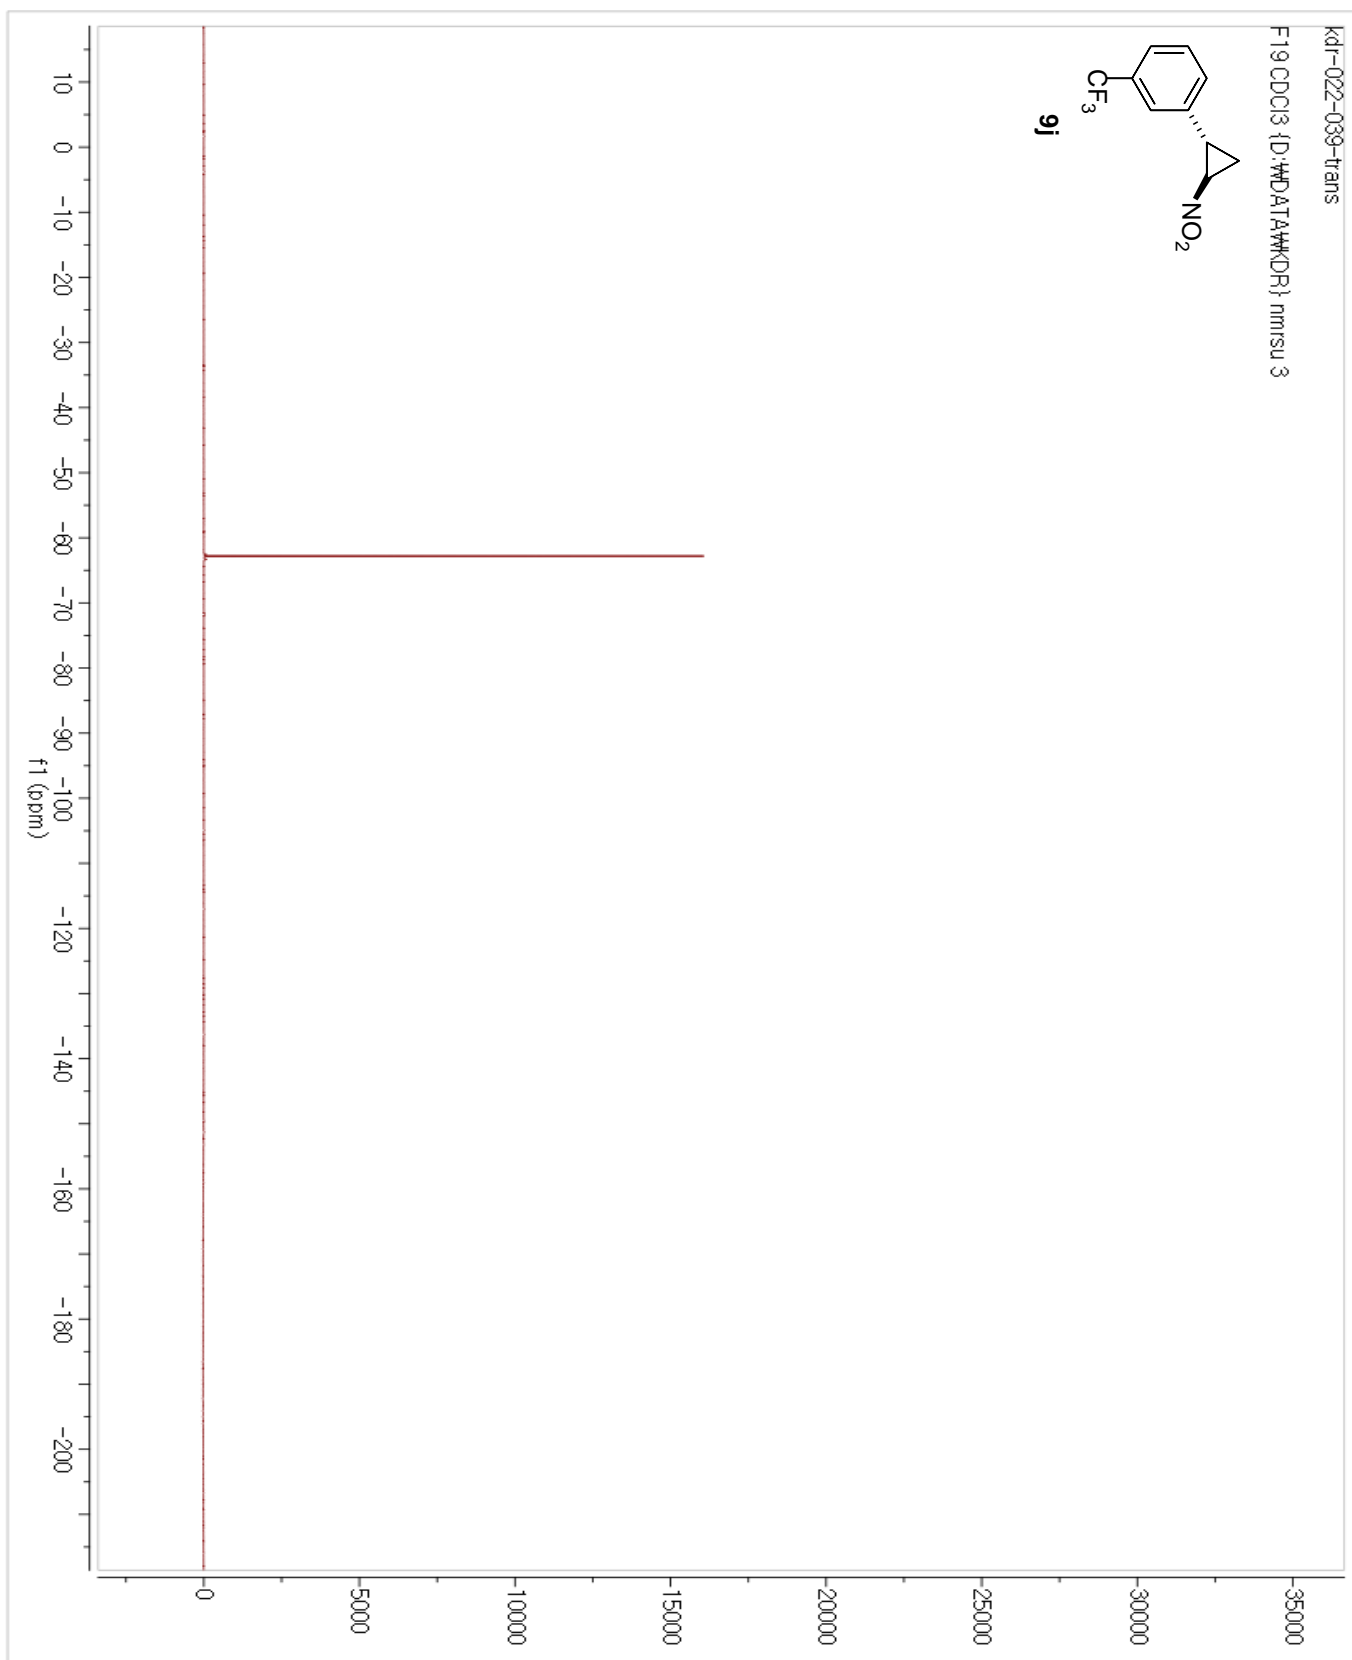

Figure S1.  $^1\text{H}$  NMR ( $\text{CDCl}_3$ ) of **9k**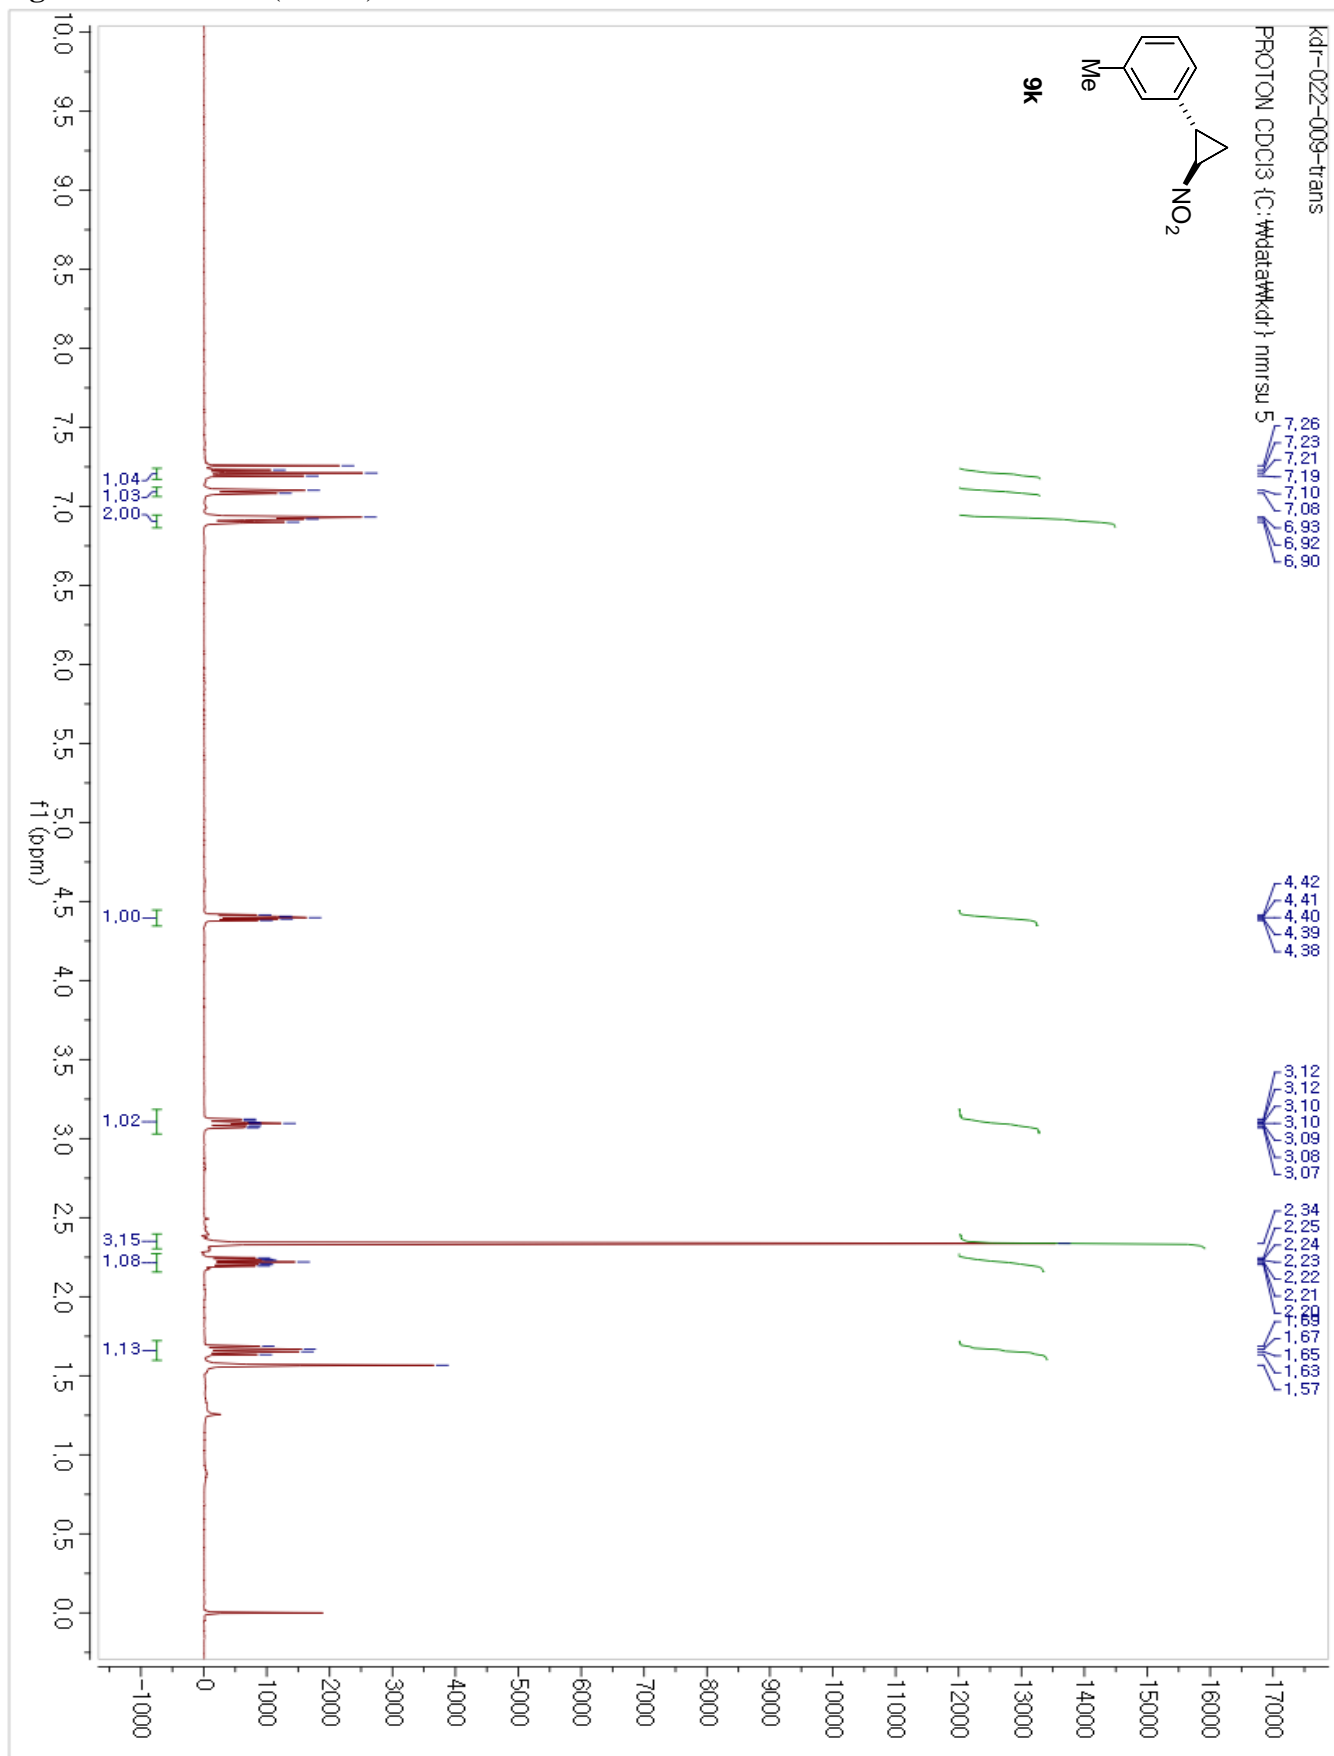

Figure 52.  $^{13}\text{C}$  NMR ( $\text{CDCl}_3$ ) of **9k**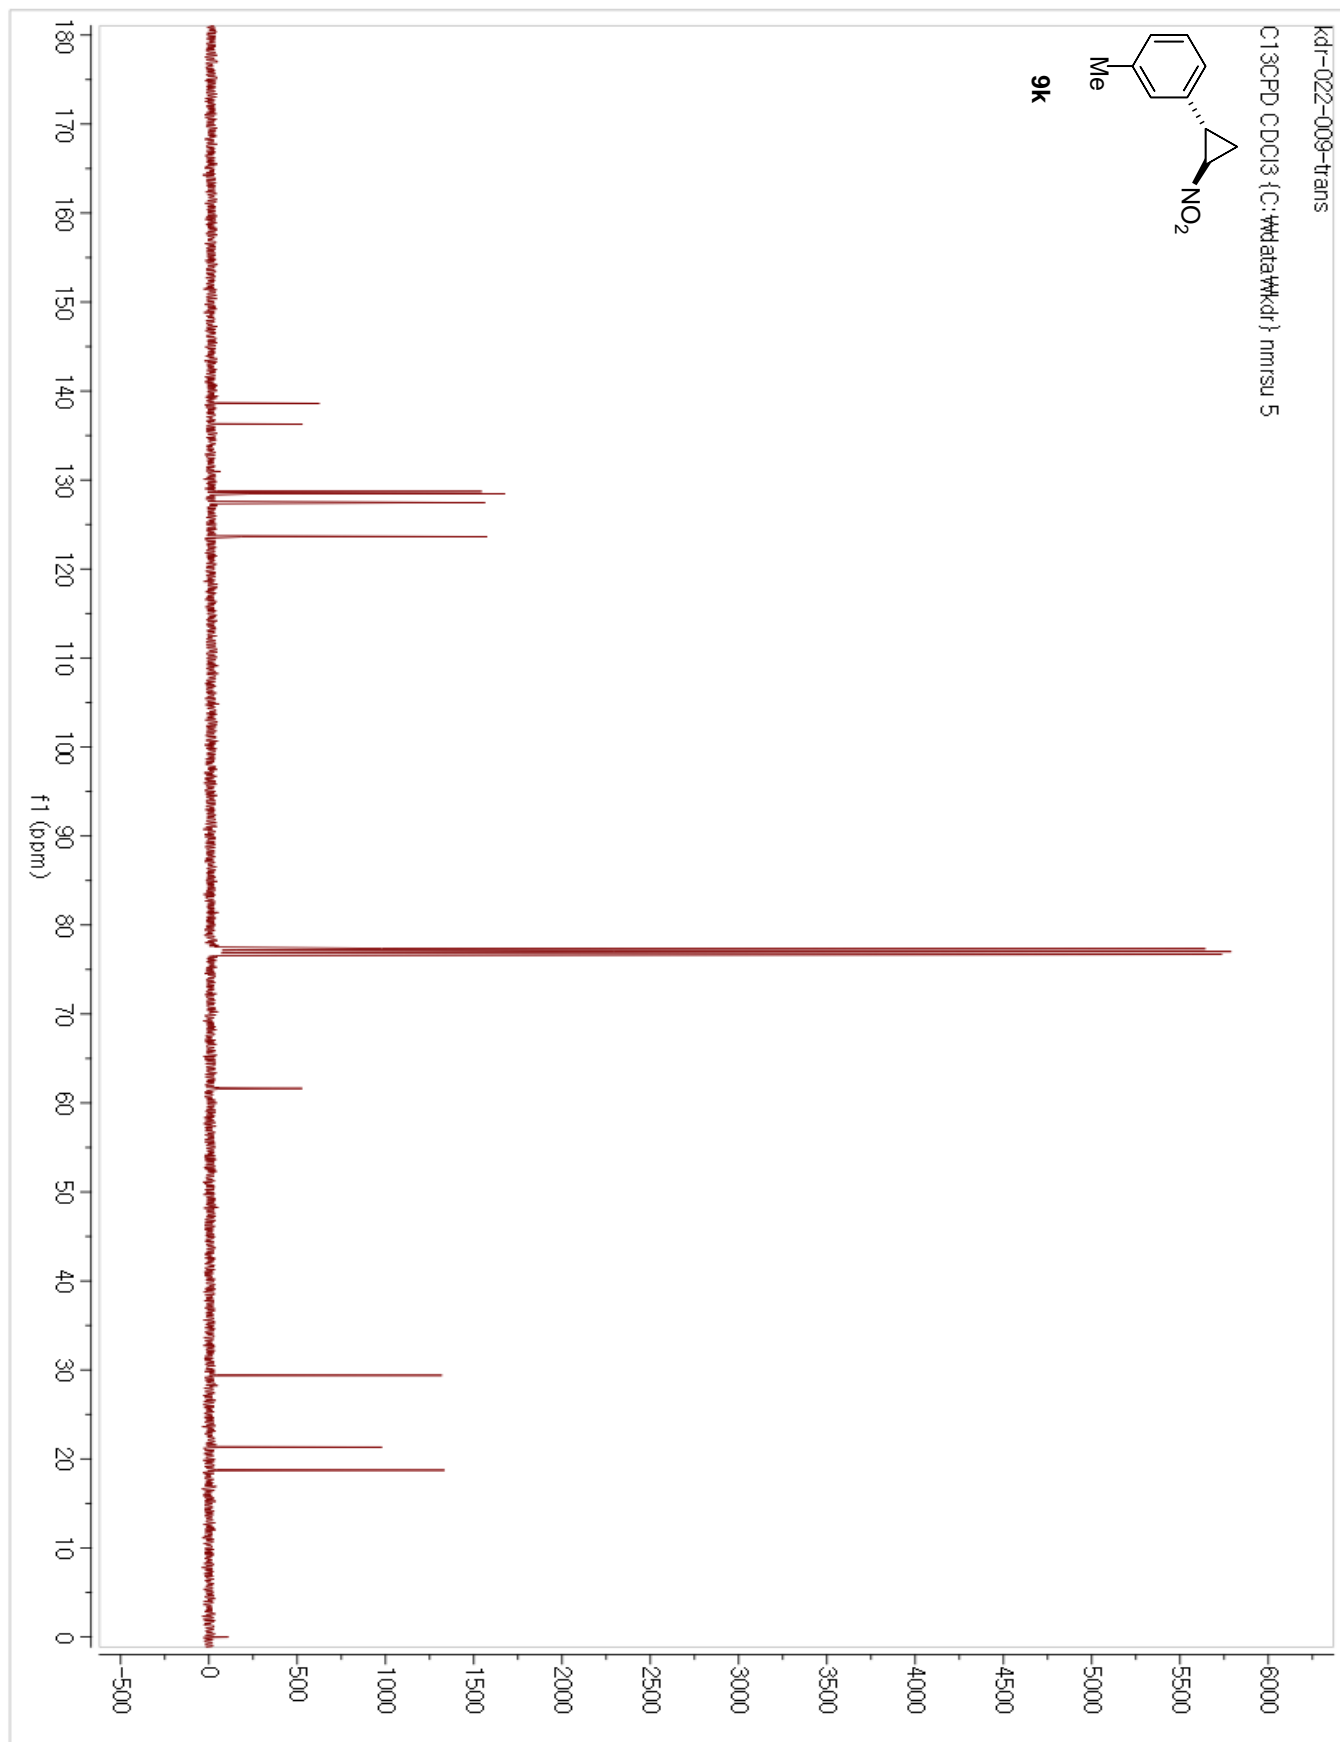

**Figure 53.**  $^1\text{H}$  NMR ( $\text{CDCl}_3$ ) of **91**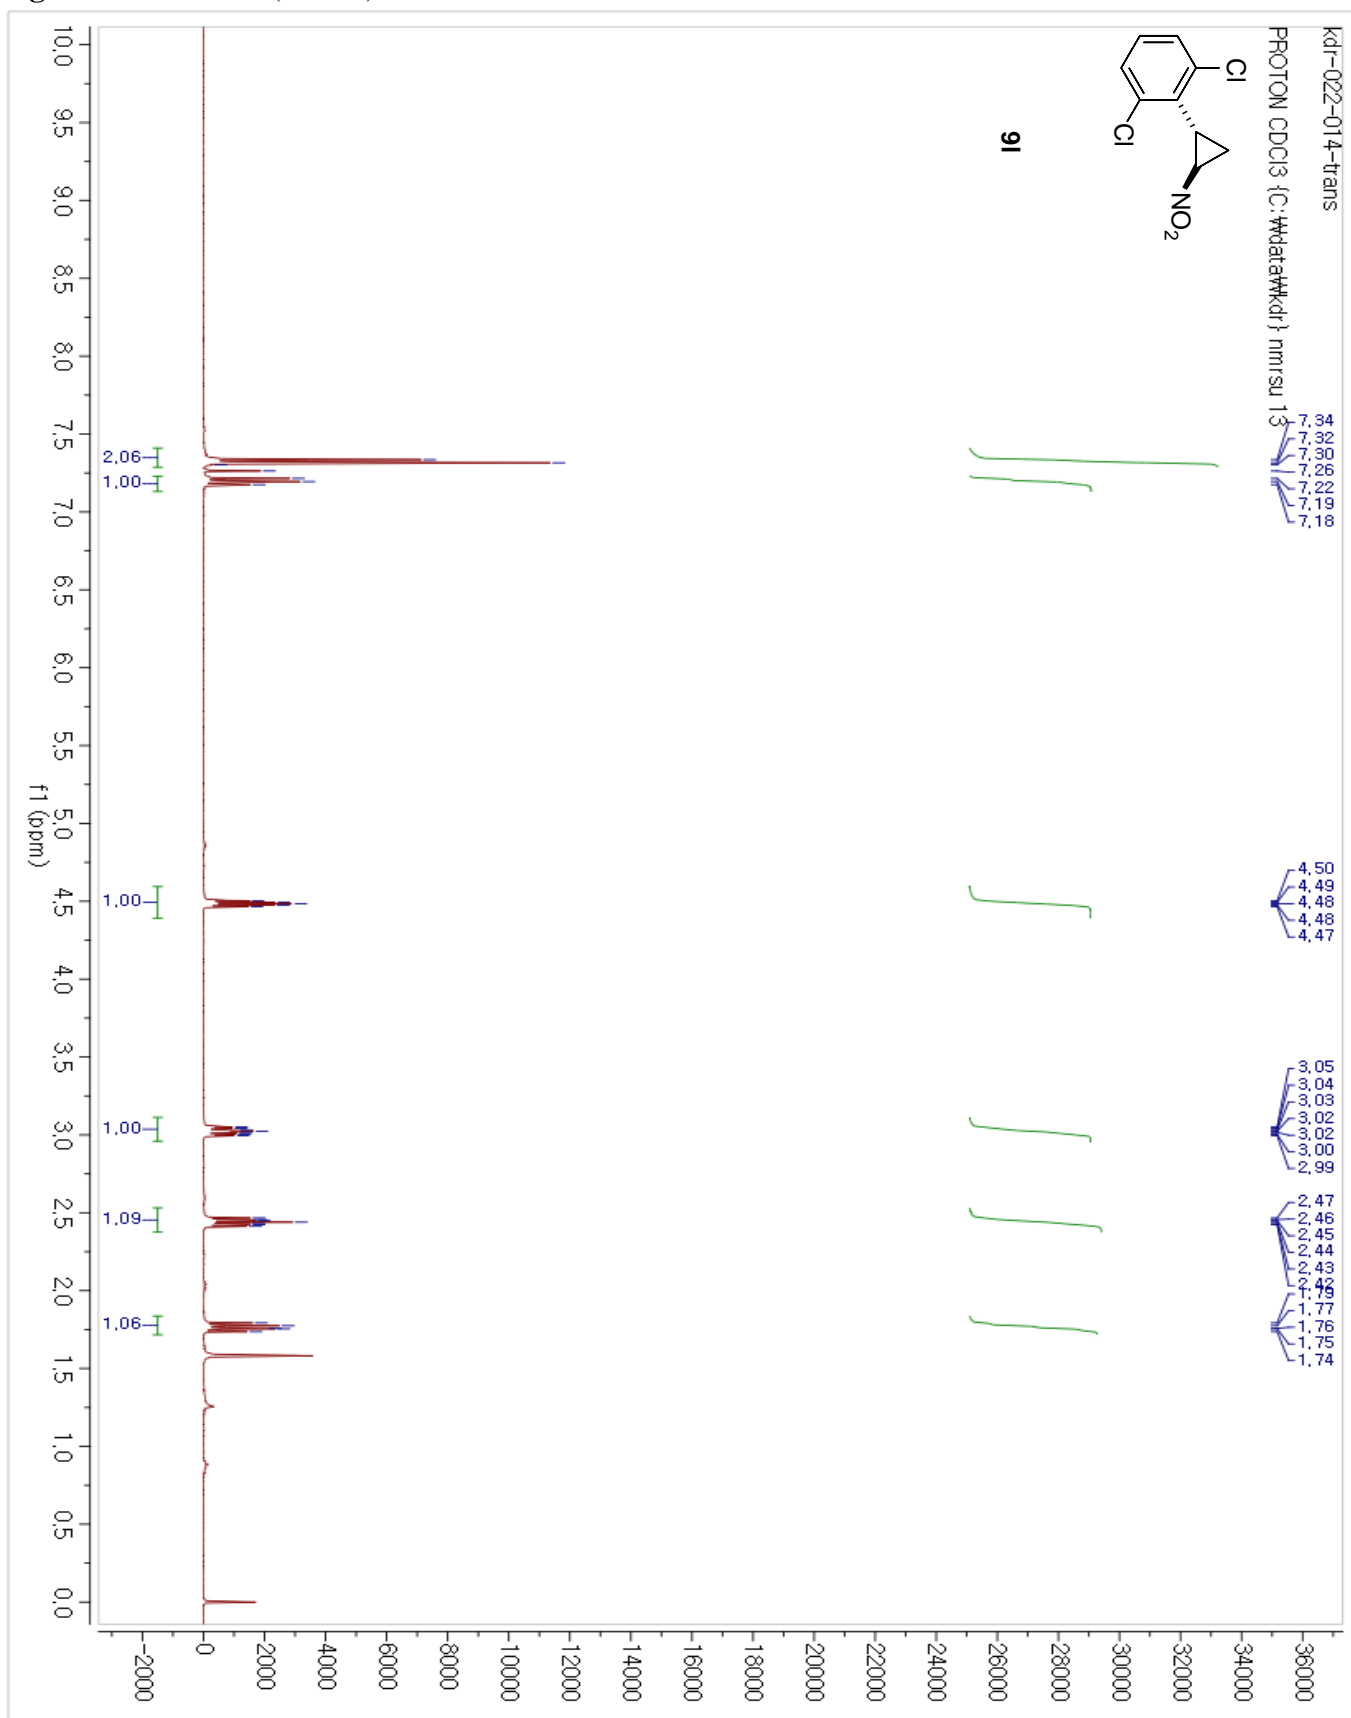

**Figure 54.**  $^{13}\text{C}$  NMR ( $\text{CDCl}_3$ ) of **91**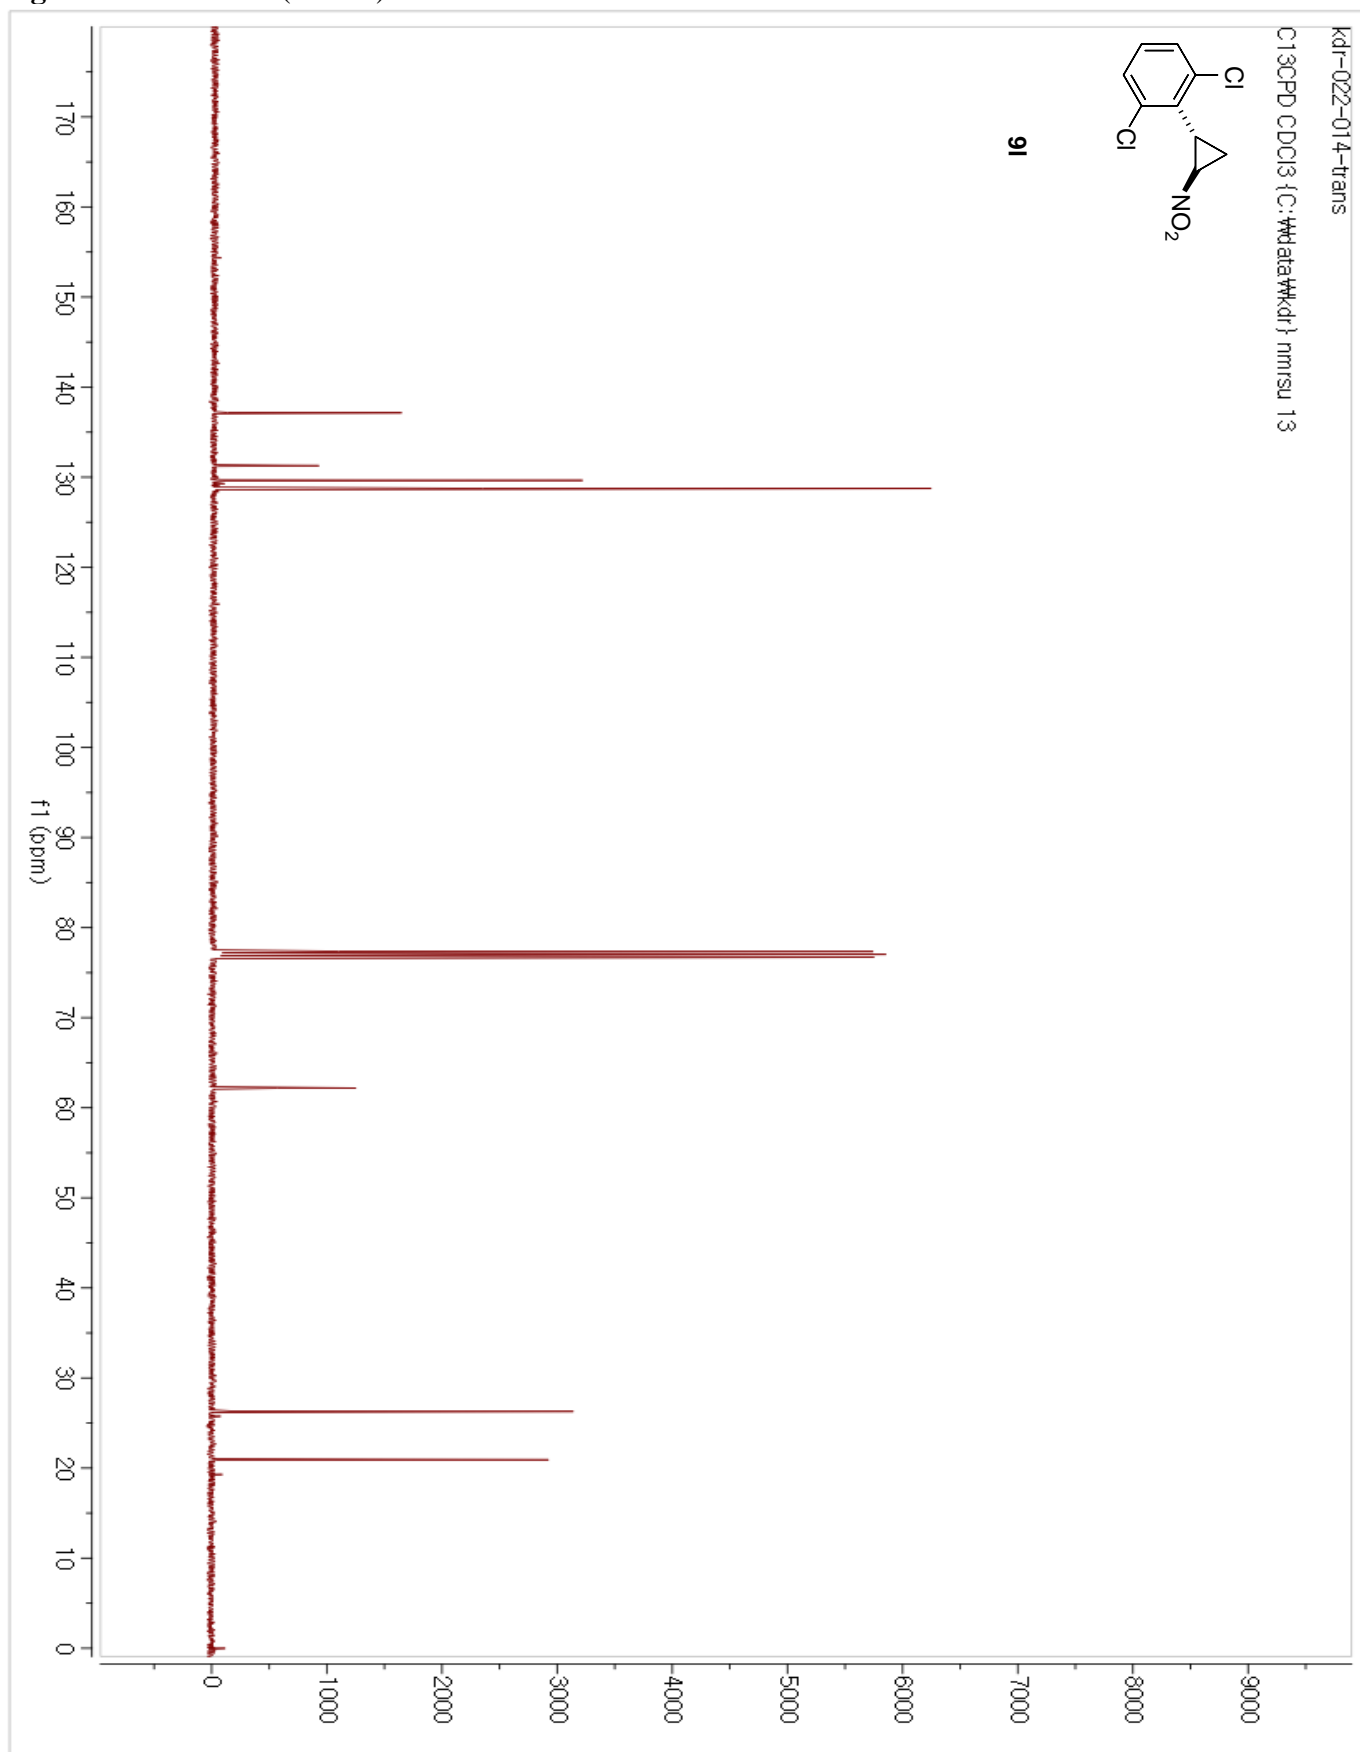

Figure 55.  $^1\text{H}$  NMR ( $\text{CDCl}_3$ ) of 9m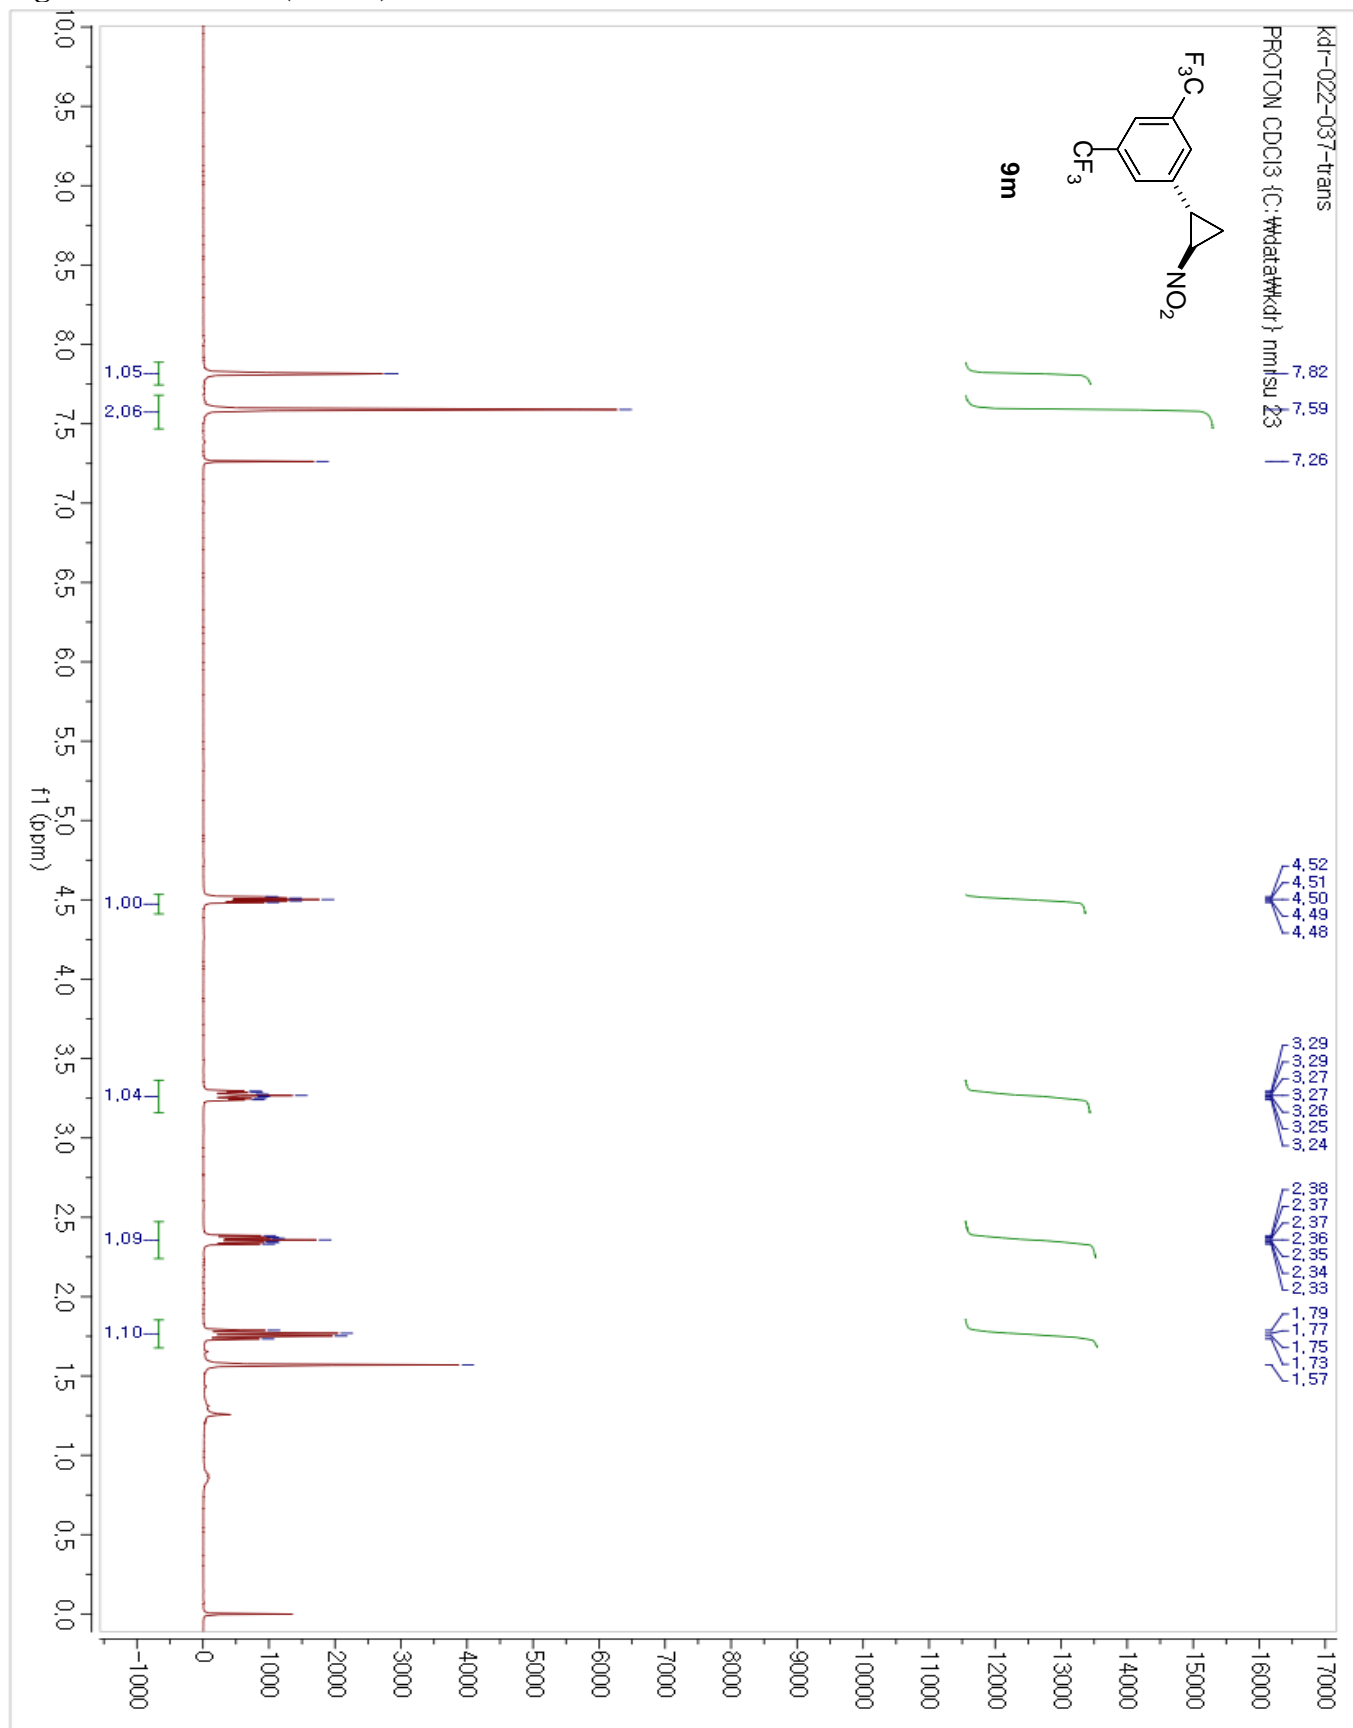

**Figure 56.**  $^{13}\text{C}$  NMR ( $\text{CDCl}_3$ ) of **9m**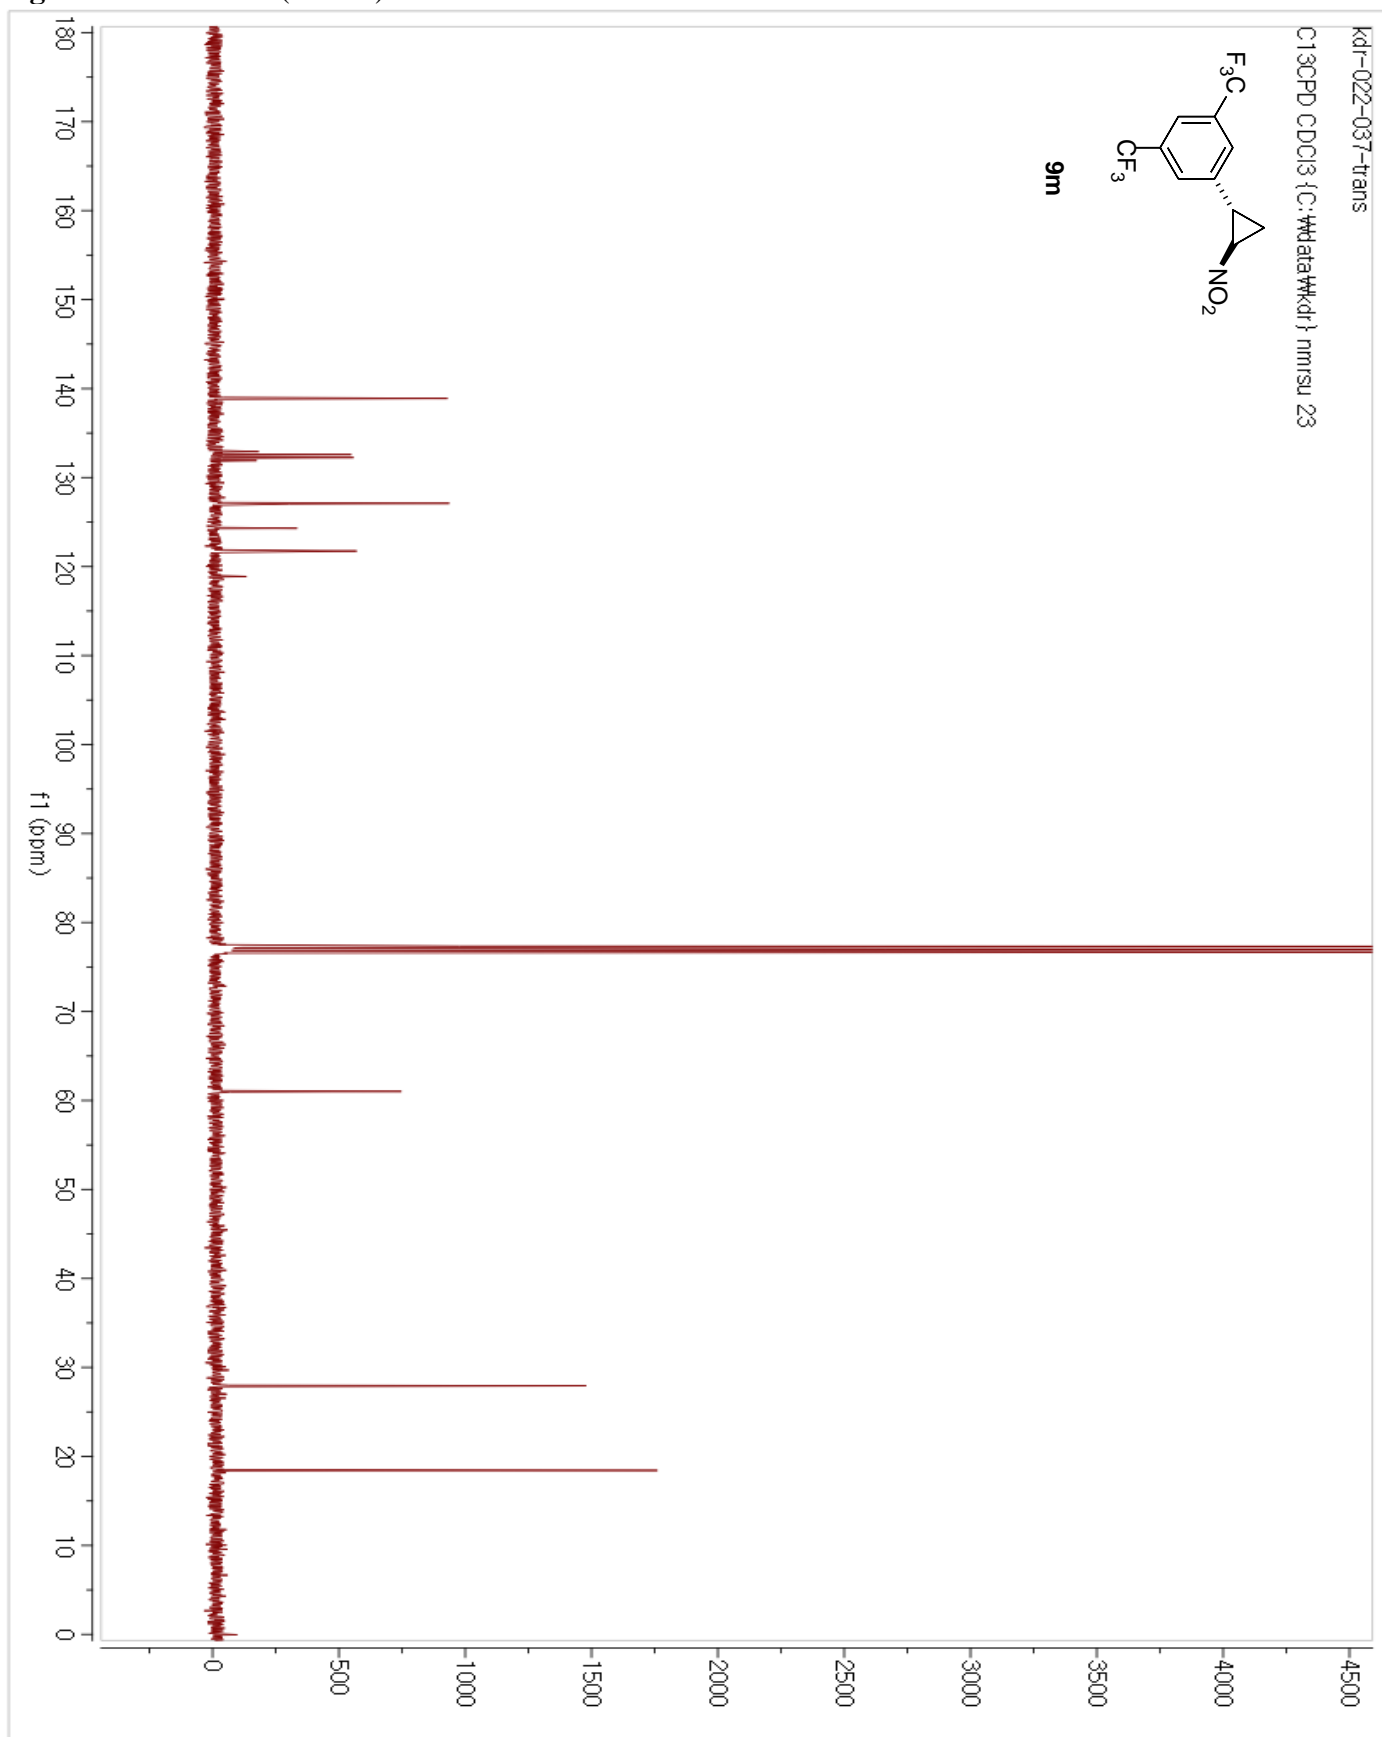



Figure S7.  $^{19}\text{F}$  NMR ( $\text{CDCl}_3$ ) of **9m**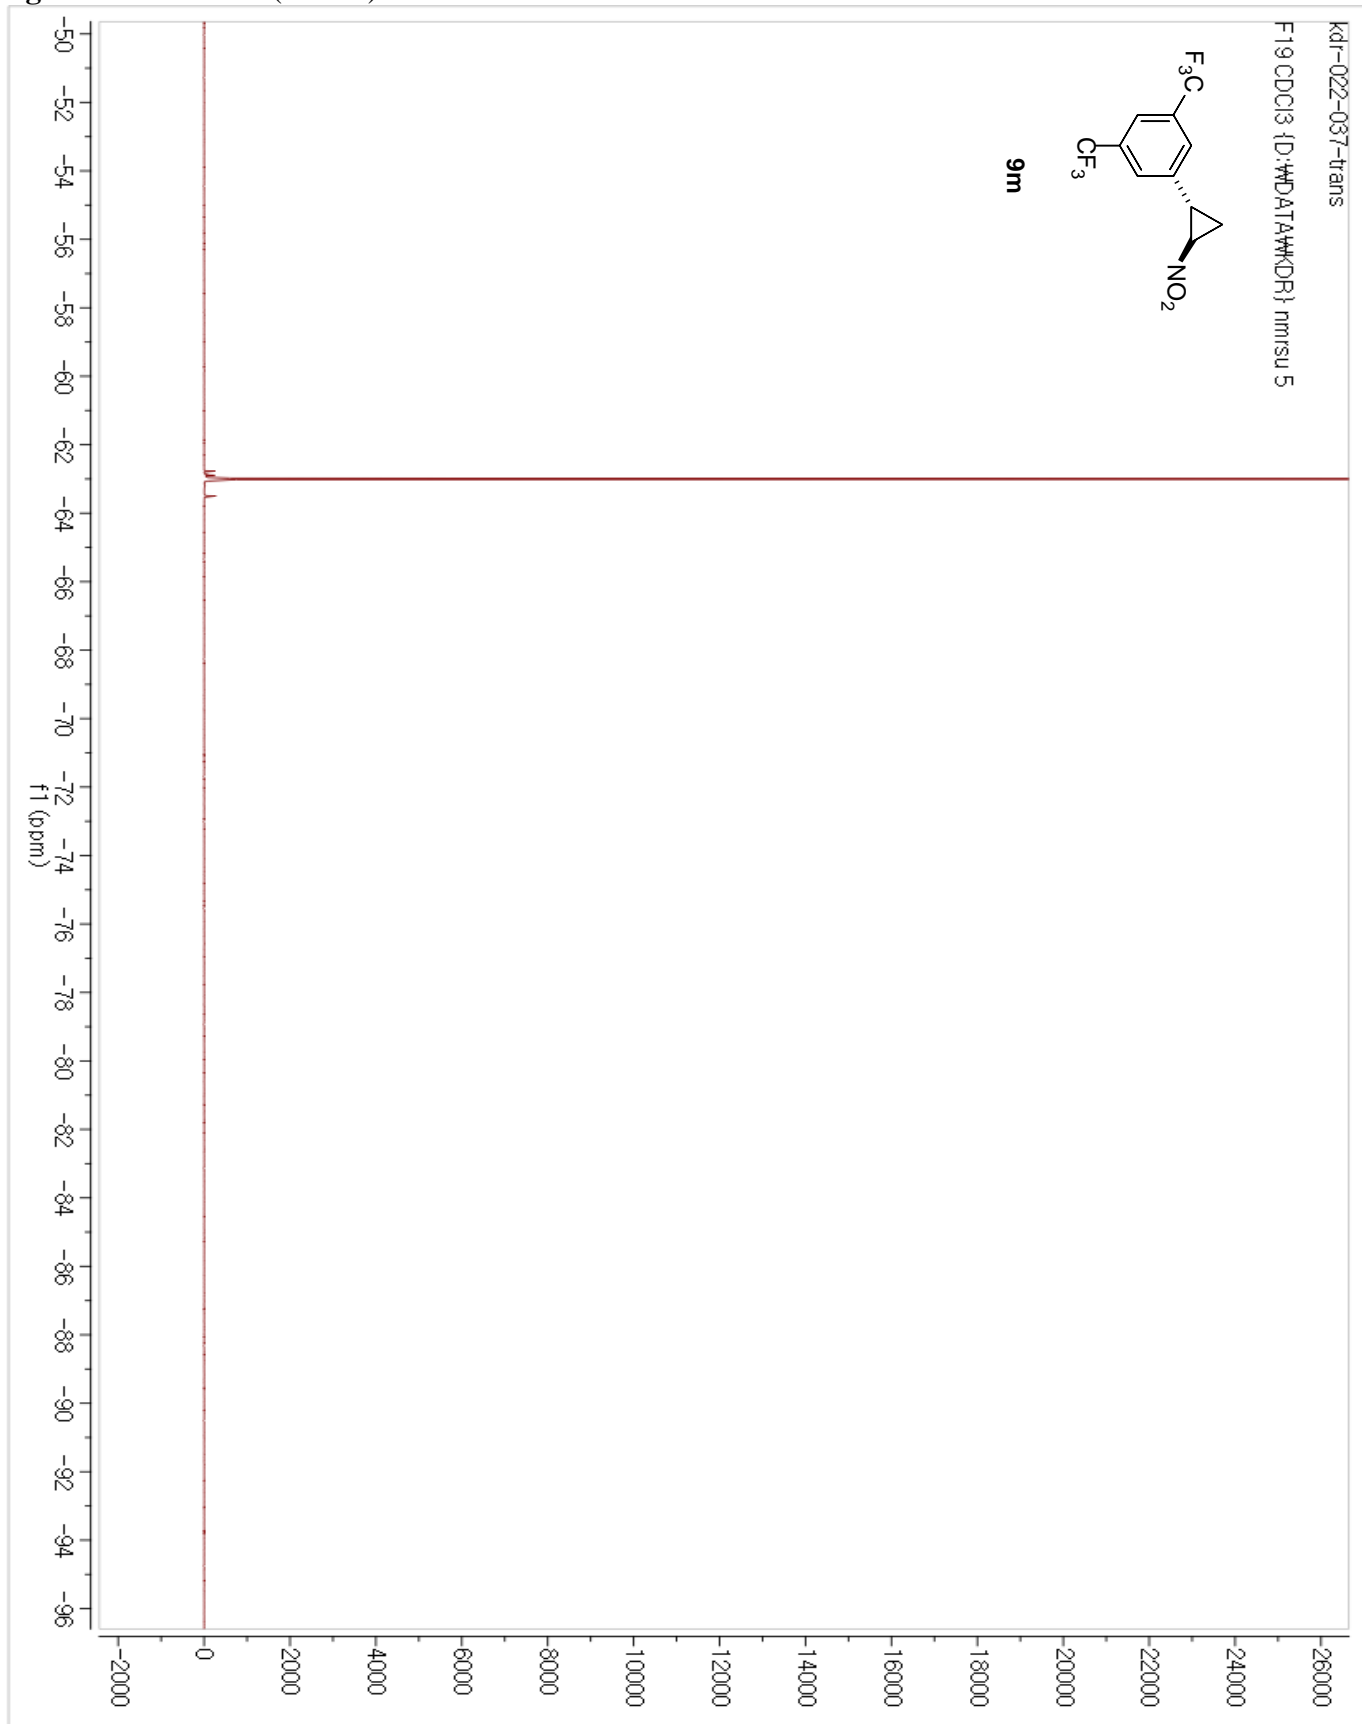

Figure 58.  $^1\text{H}$  NMR ( $\text{CDCl}_3$ ) of **9n**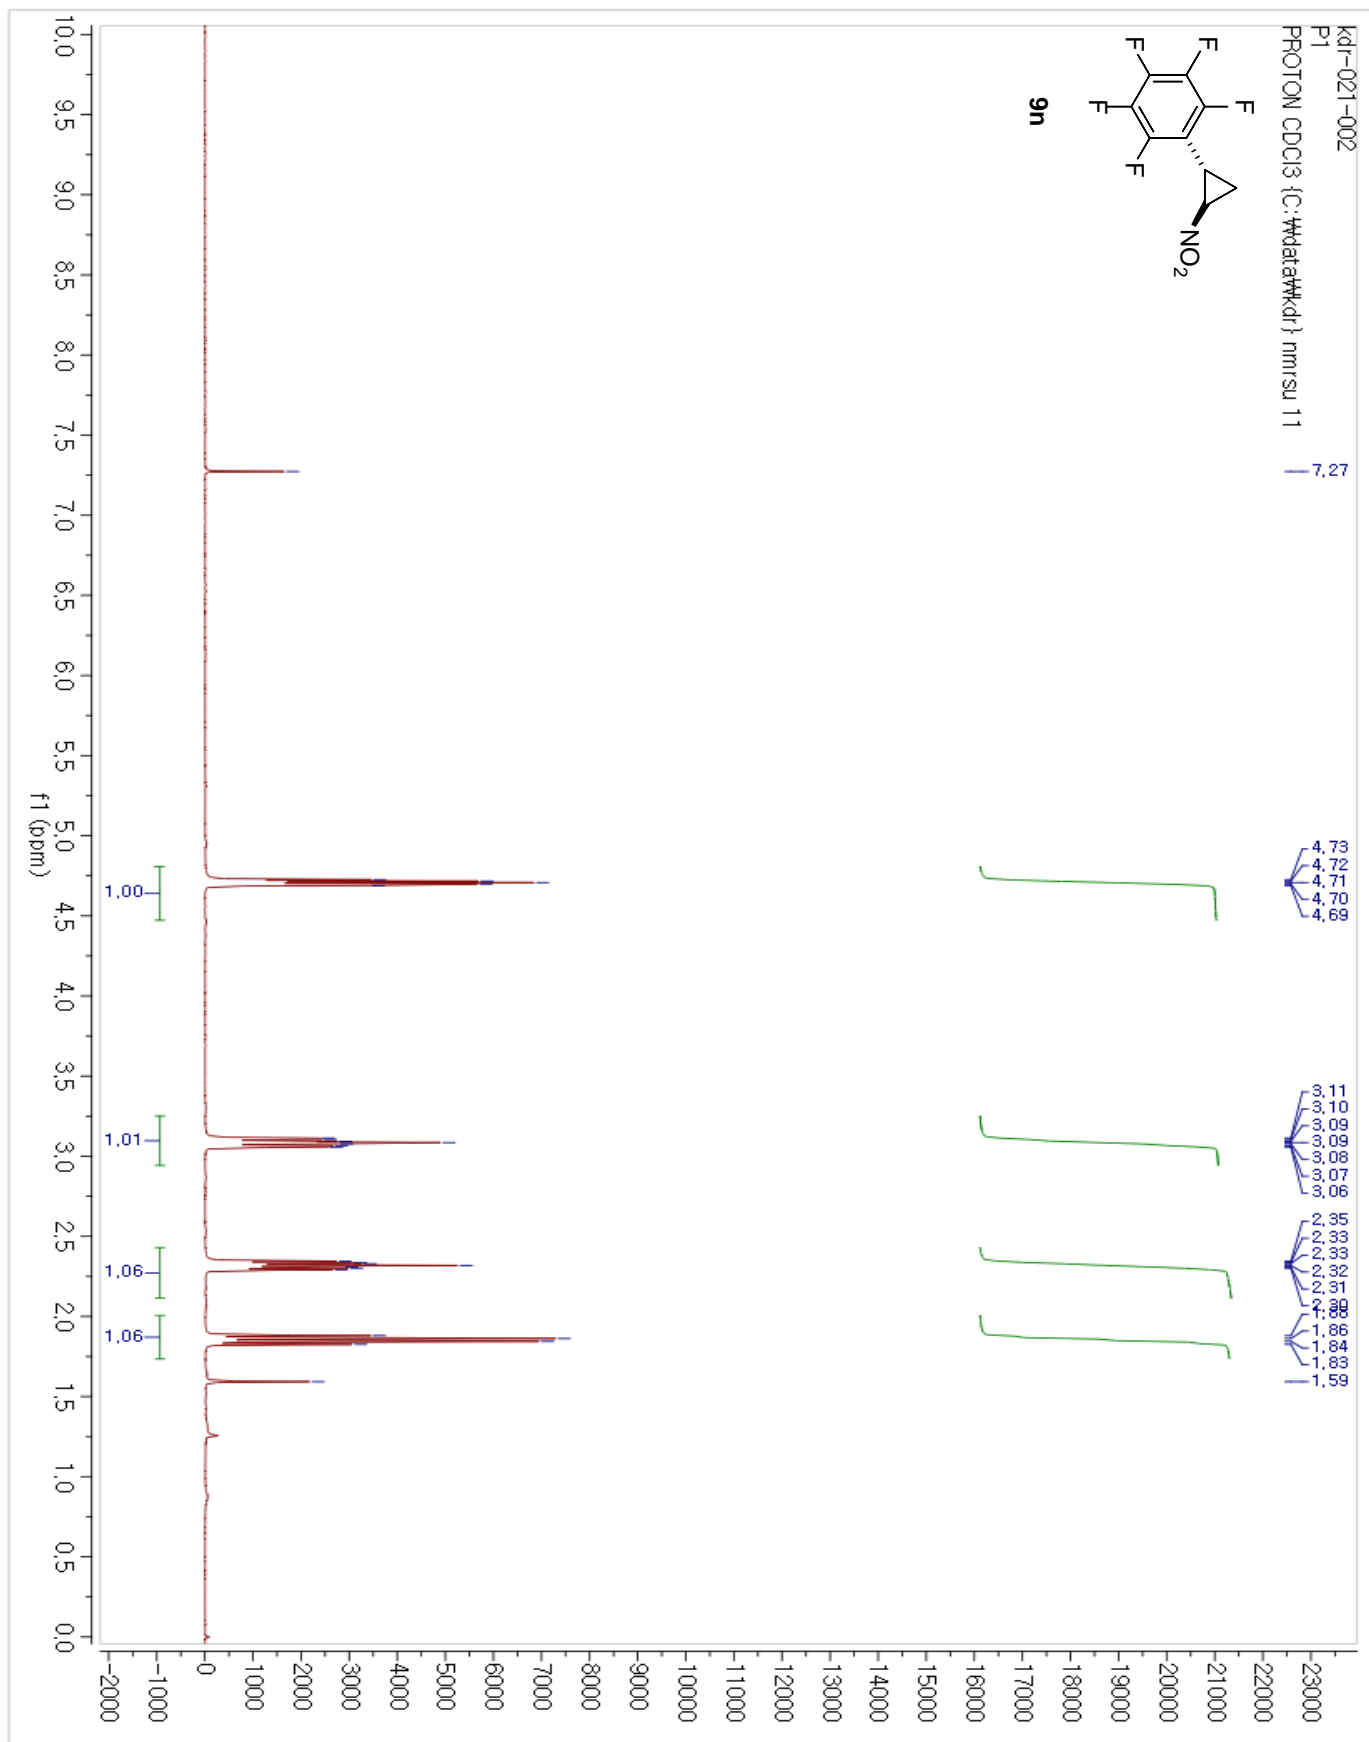

Figure 59.  $^{13}\text{C}$  NMR ( $\text{CDCl}_3$ ) of **9n**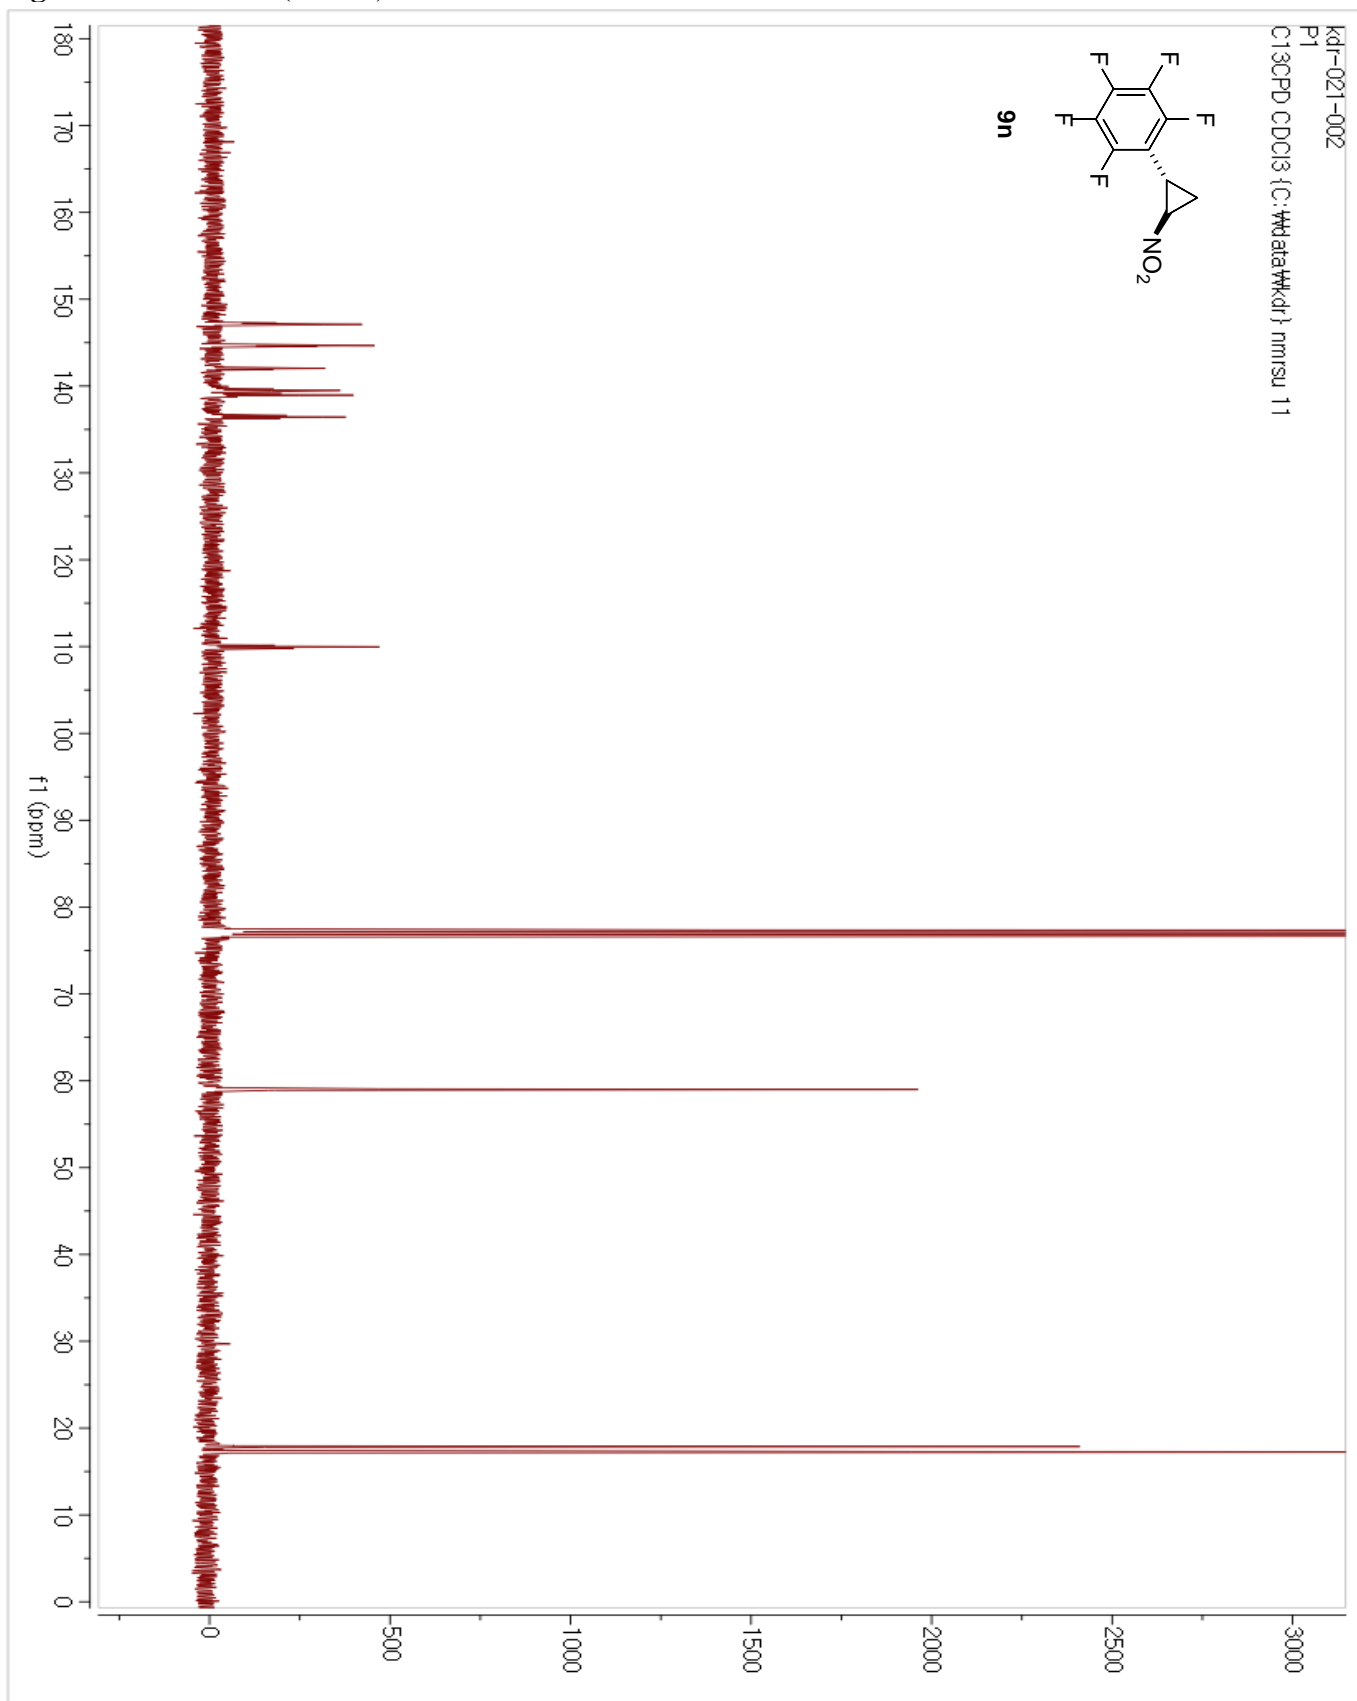

Figure 60.  $^{19}\text{F}$  NMR ( $\text{CDCl}_3$ ) of **9n**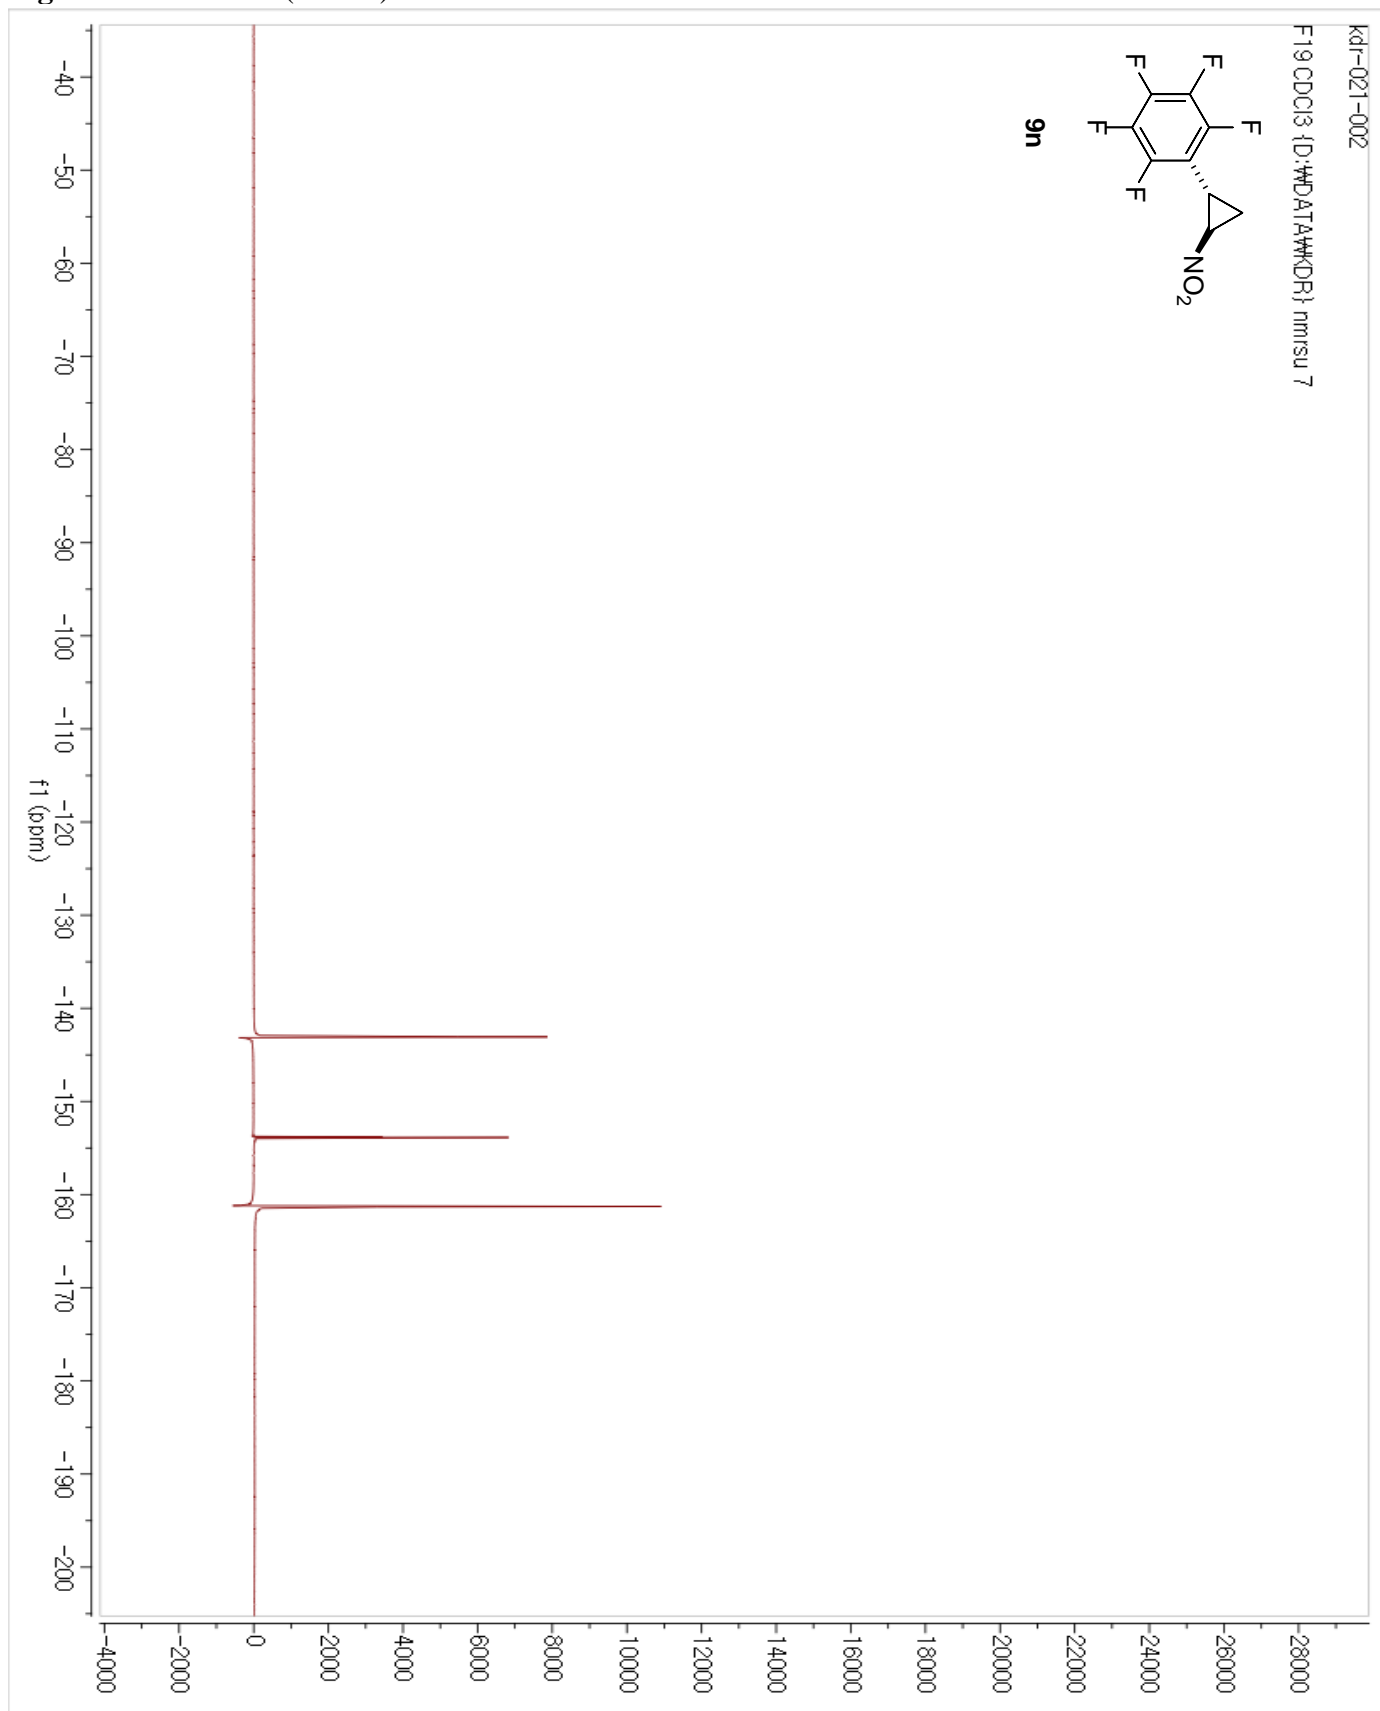

**Figure 61.**  $^1\text{H}$  NMR ( $\text{CDCl}_3$ ) of **10**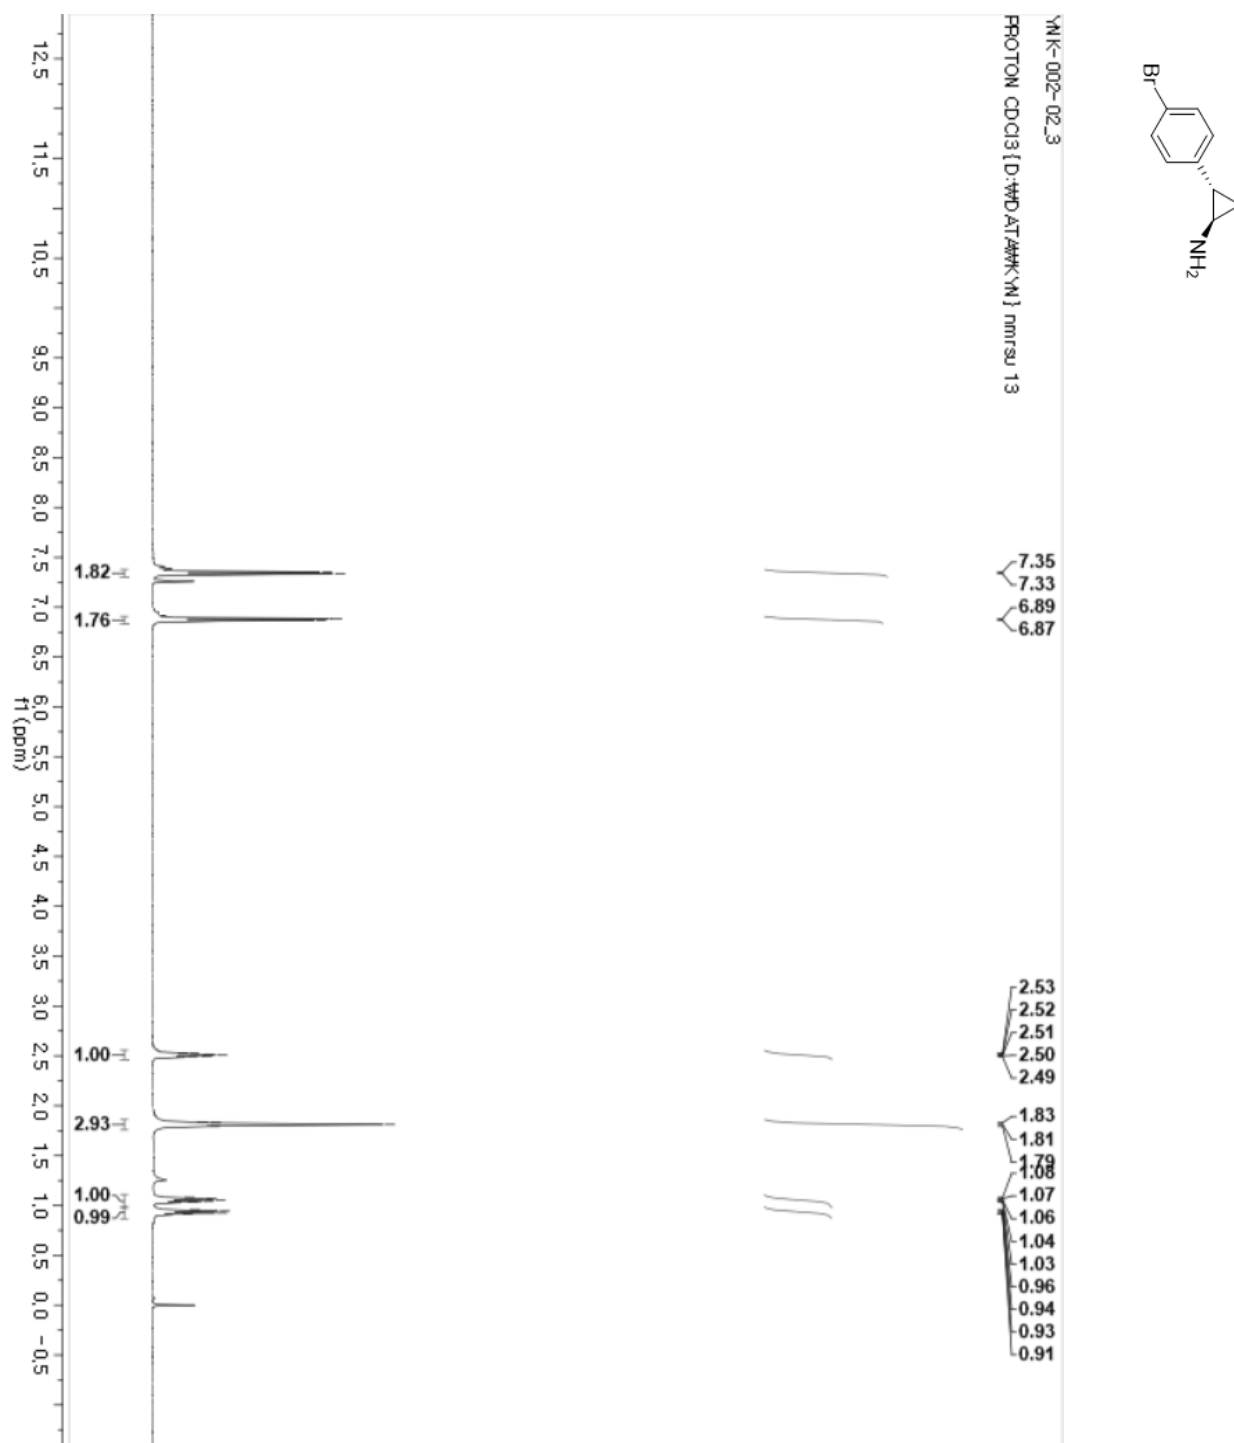

**Figure 62.**  $^{13}\text{C}$  NMR ( $\text{CDCl}_3$ ) of **10**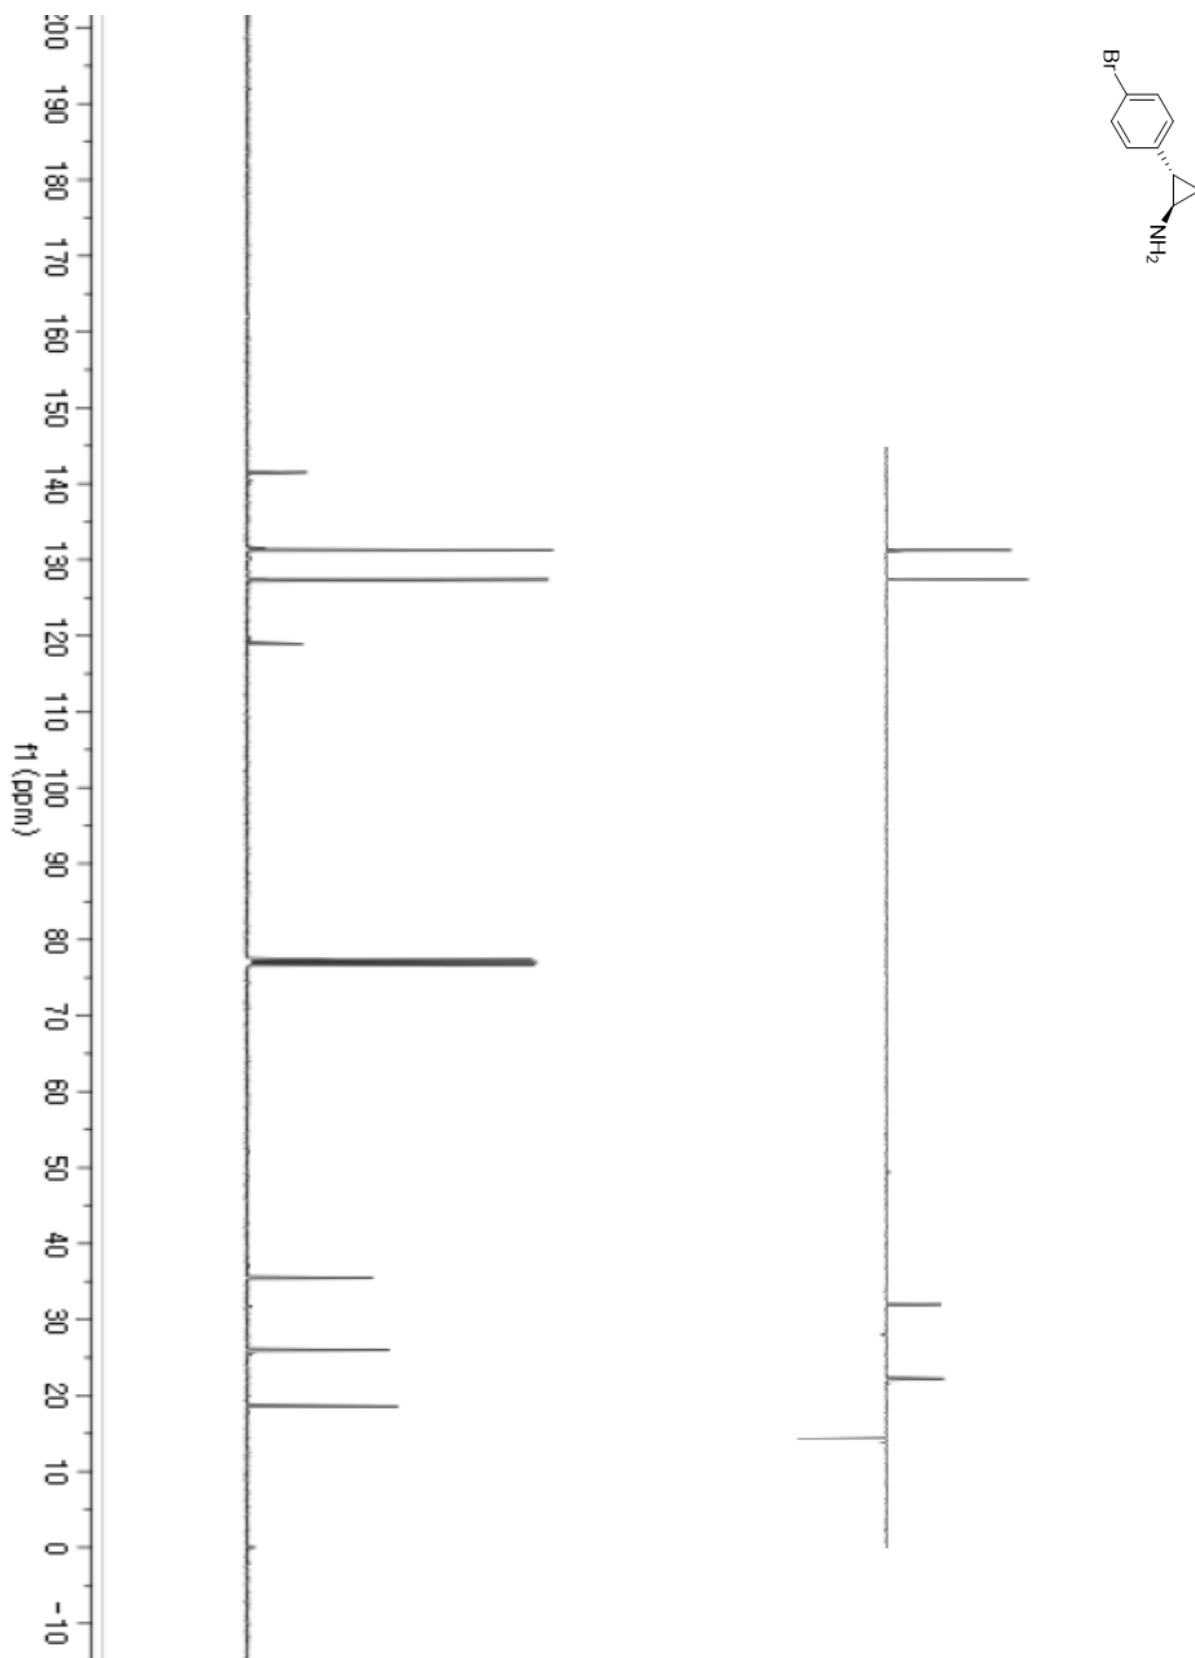

Figure 63.  $^1\text{H}$  NMR ( $\text{CDCl}_3$ ) of 11a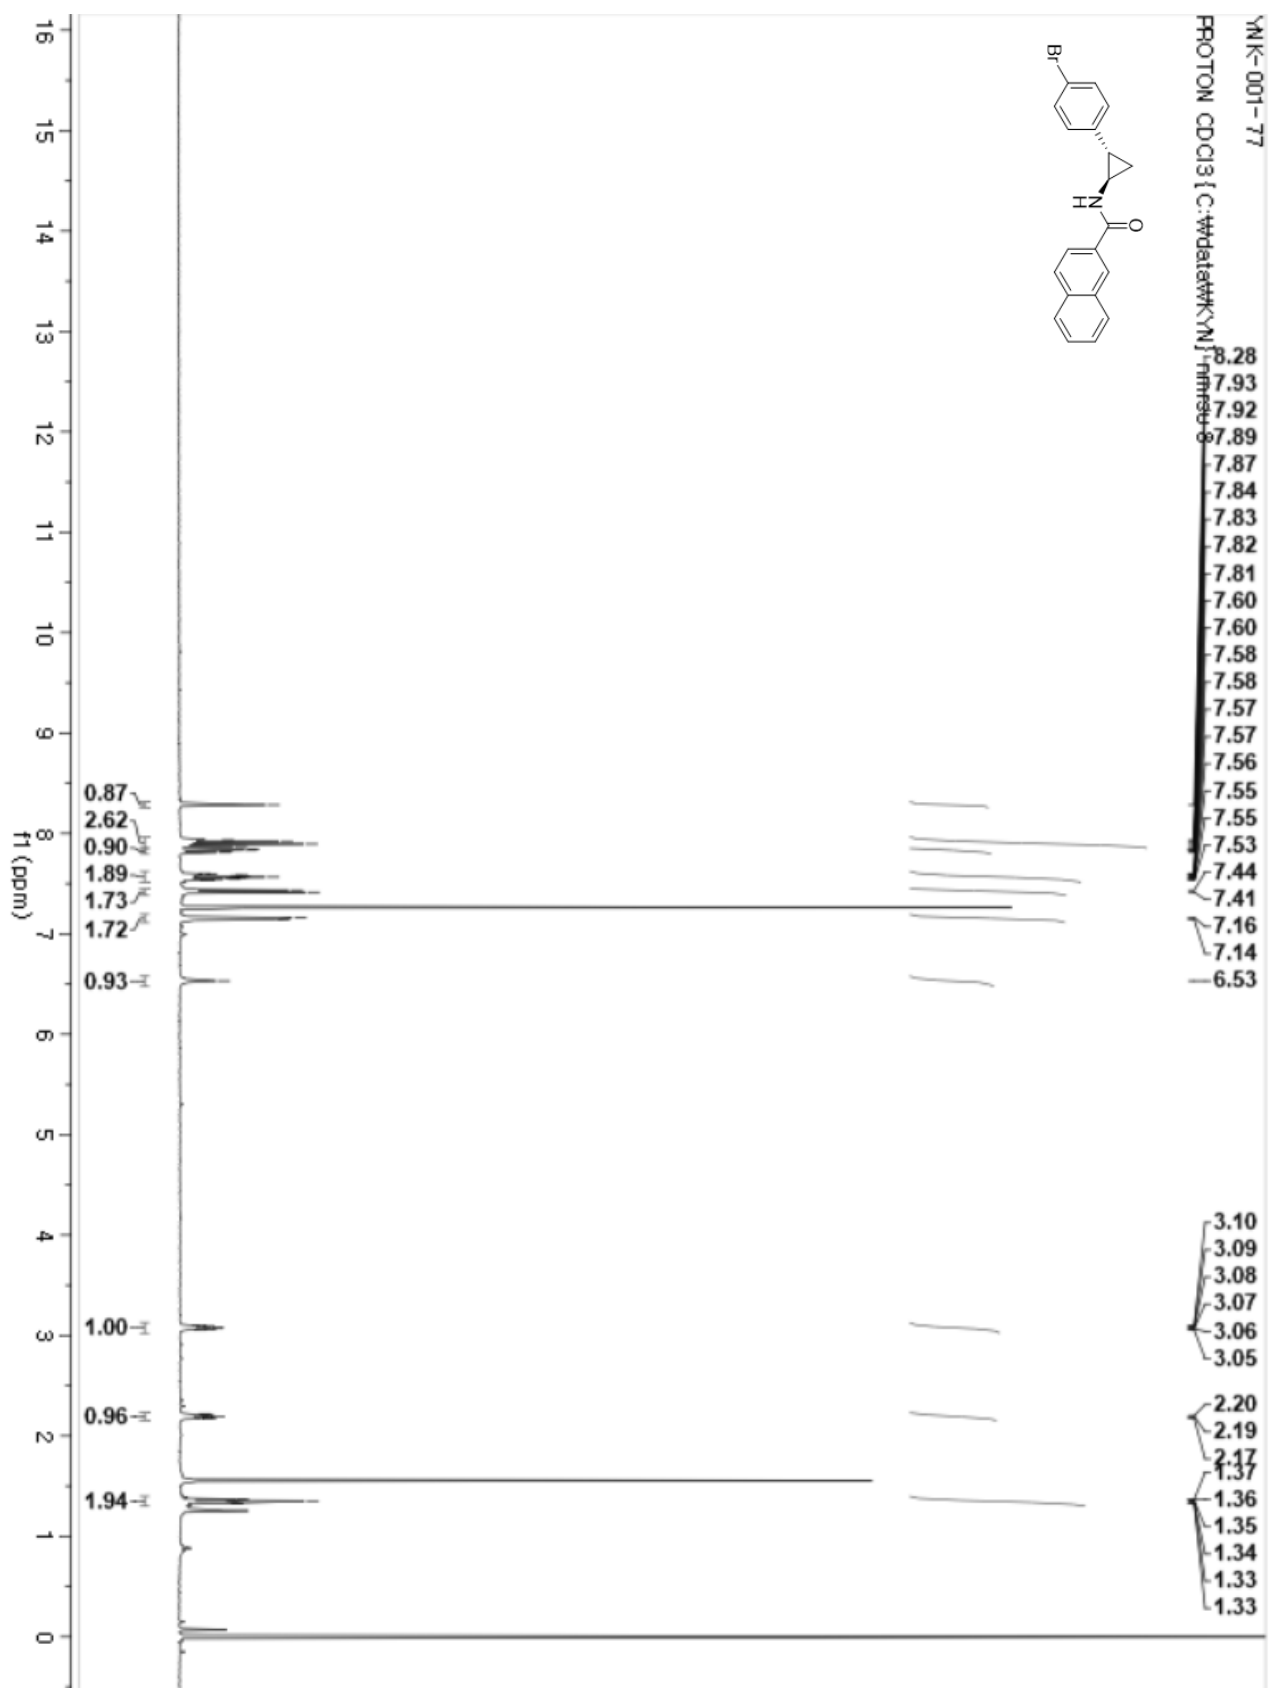

**Figure 64.**  $^{13}\text{C}$  NMR ( $\text{CDCl}_3$ ) of 11a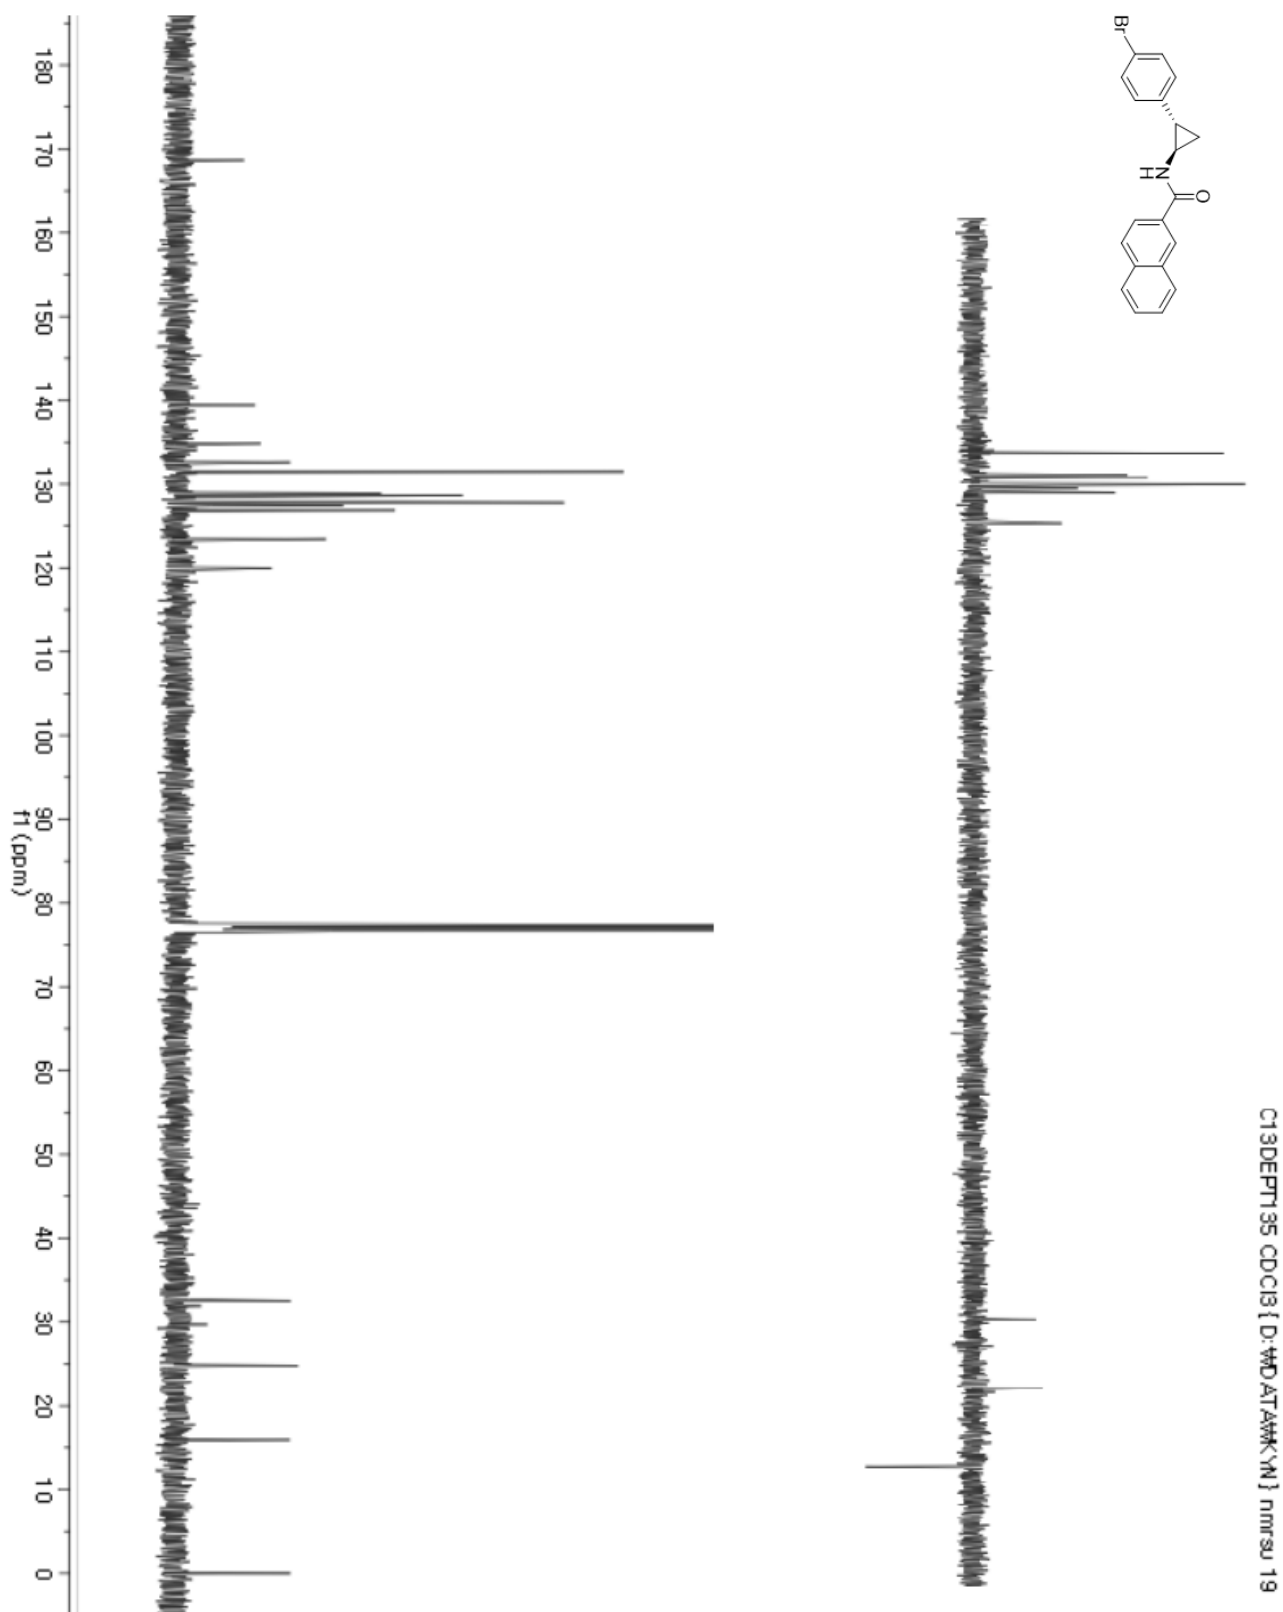



Figure 65.  $^1\text{H}$  NMR ( $\text{CDCl}_3$ ) of 11b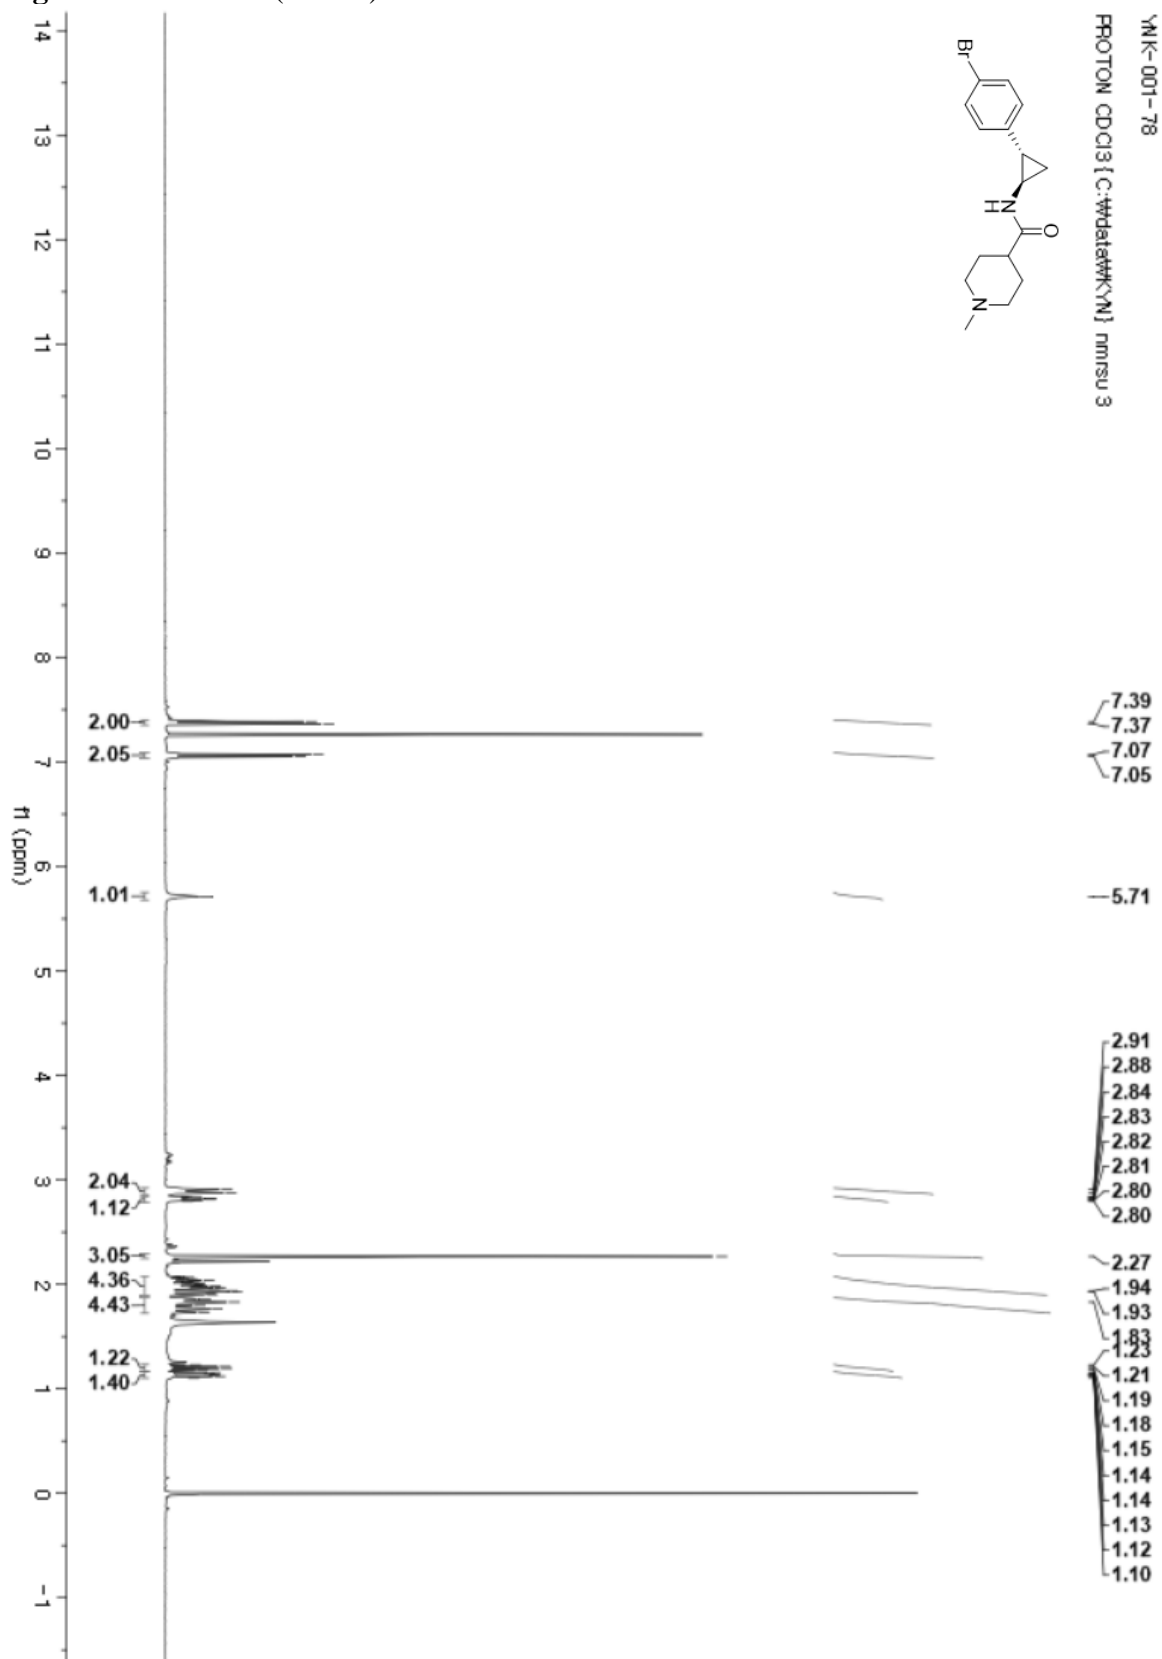

Figure 66.  $^{13}\text{C}$  NMR ( $\text{CDCl}_3$ ) of **11b**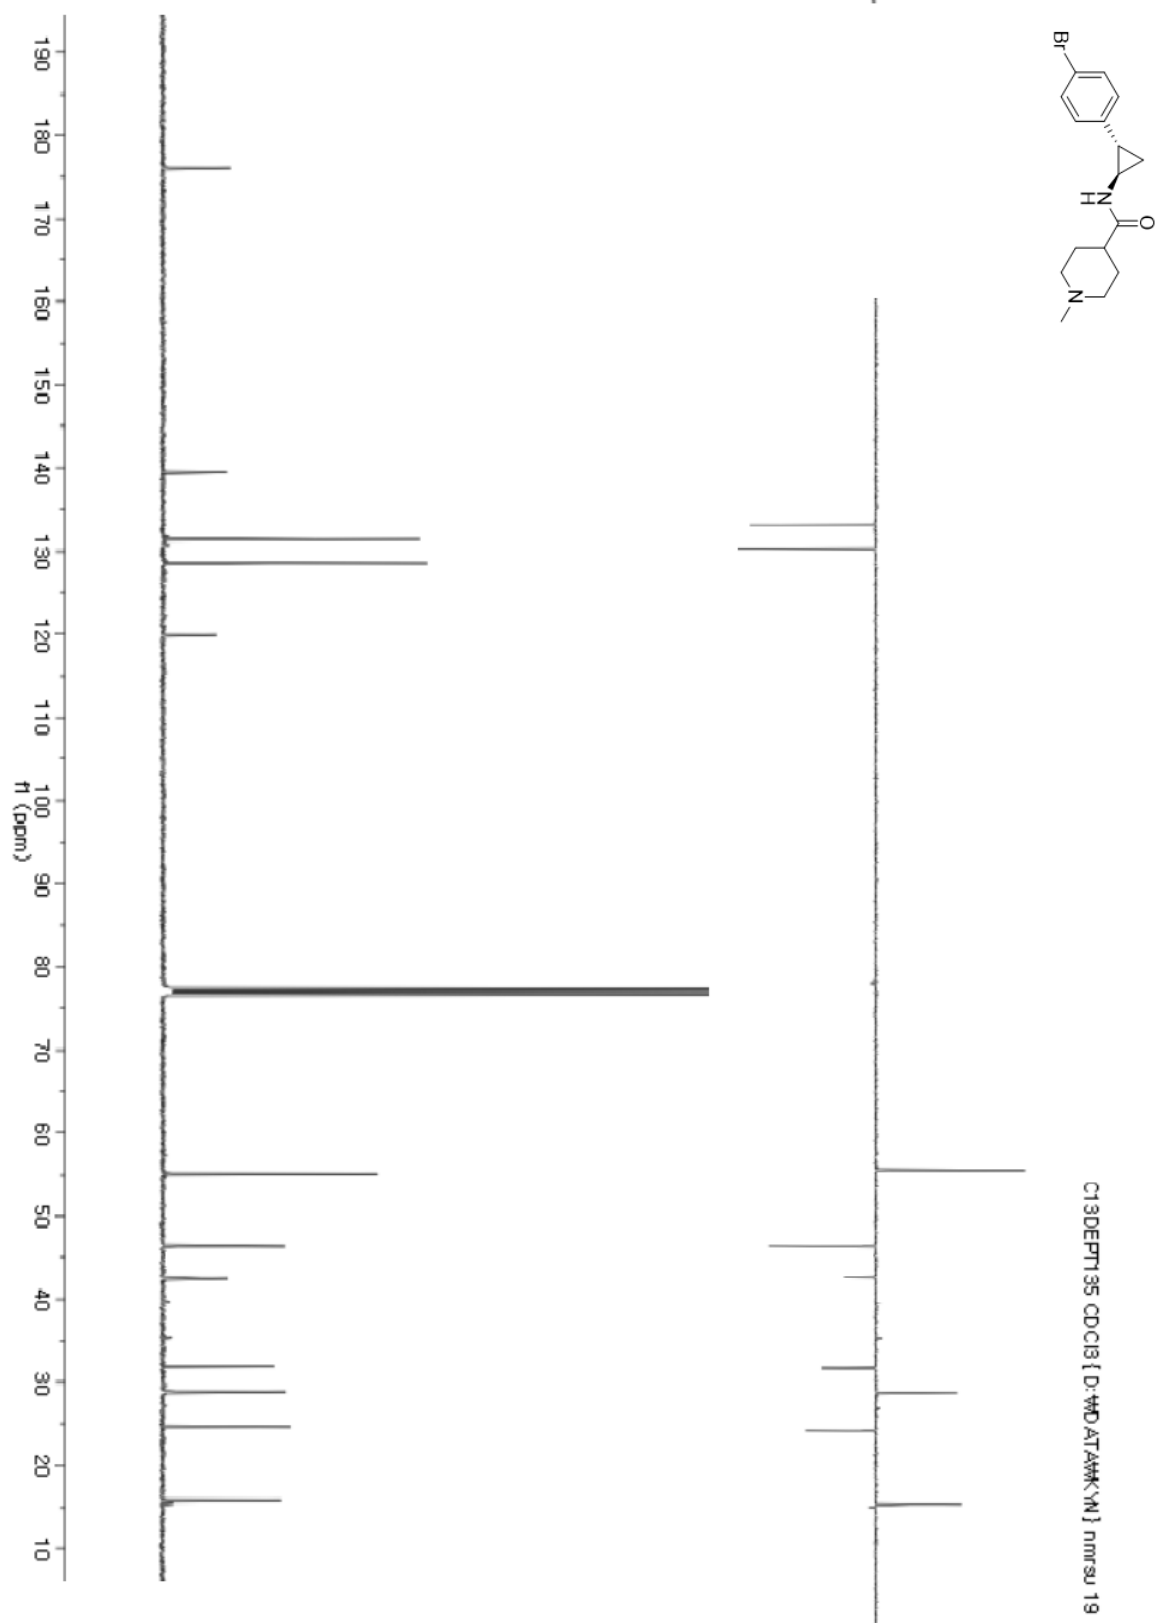

Figure 67.  $^1\text{H}$  NMR ( $\text{CDCl}_3$ ) of **11c**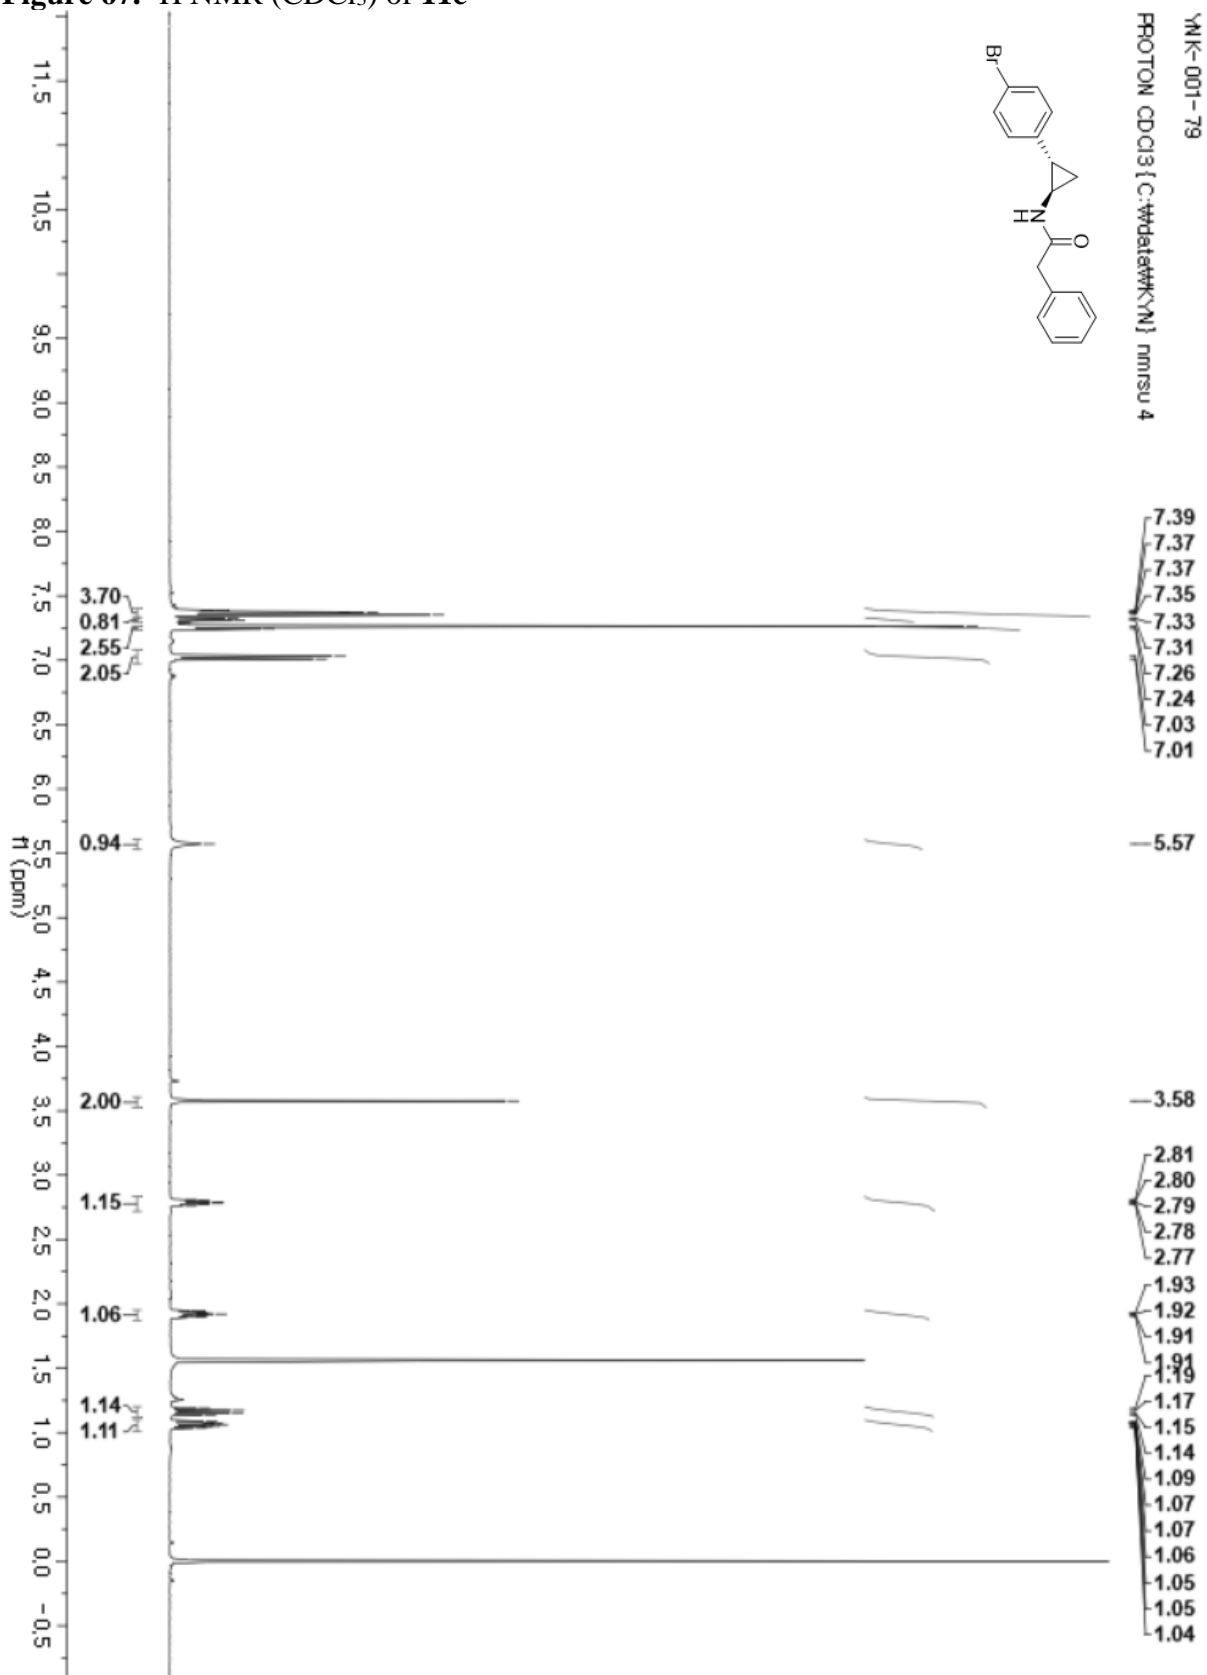

**Figure 68.**  $^{13}\text{C}$  NMR ( $\text{CDCl}_3$ ) of 11c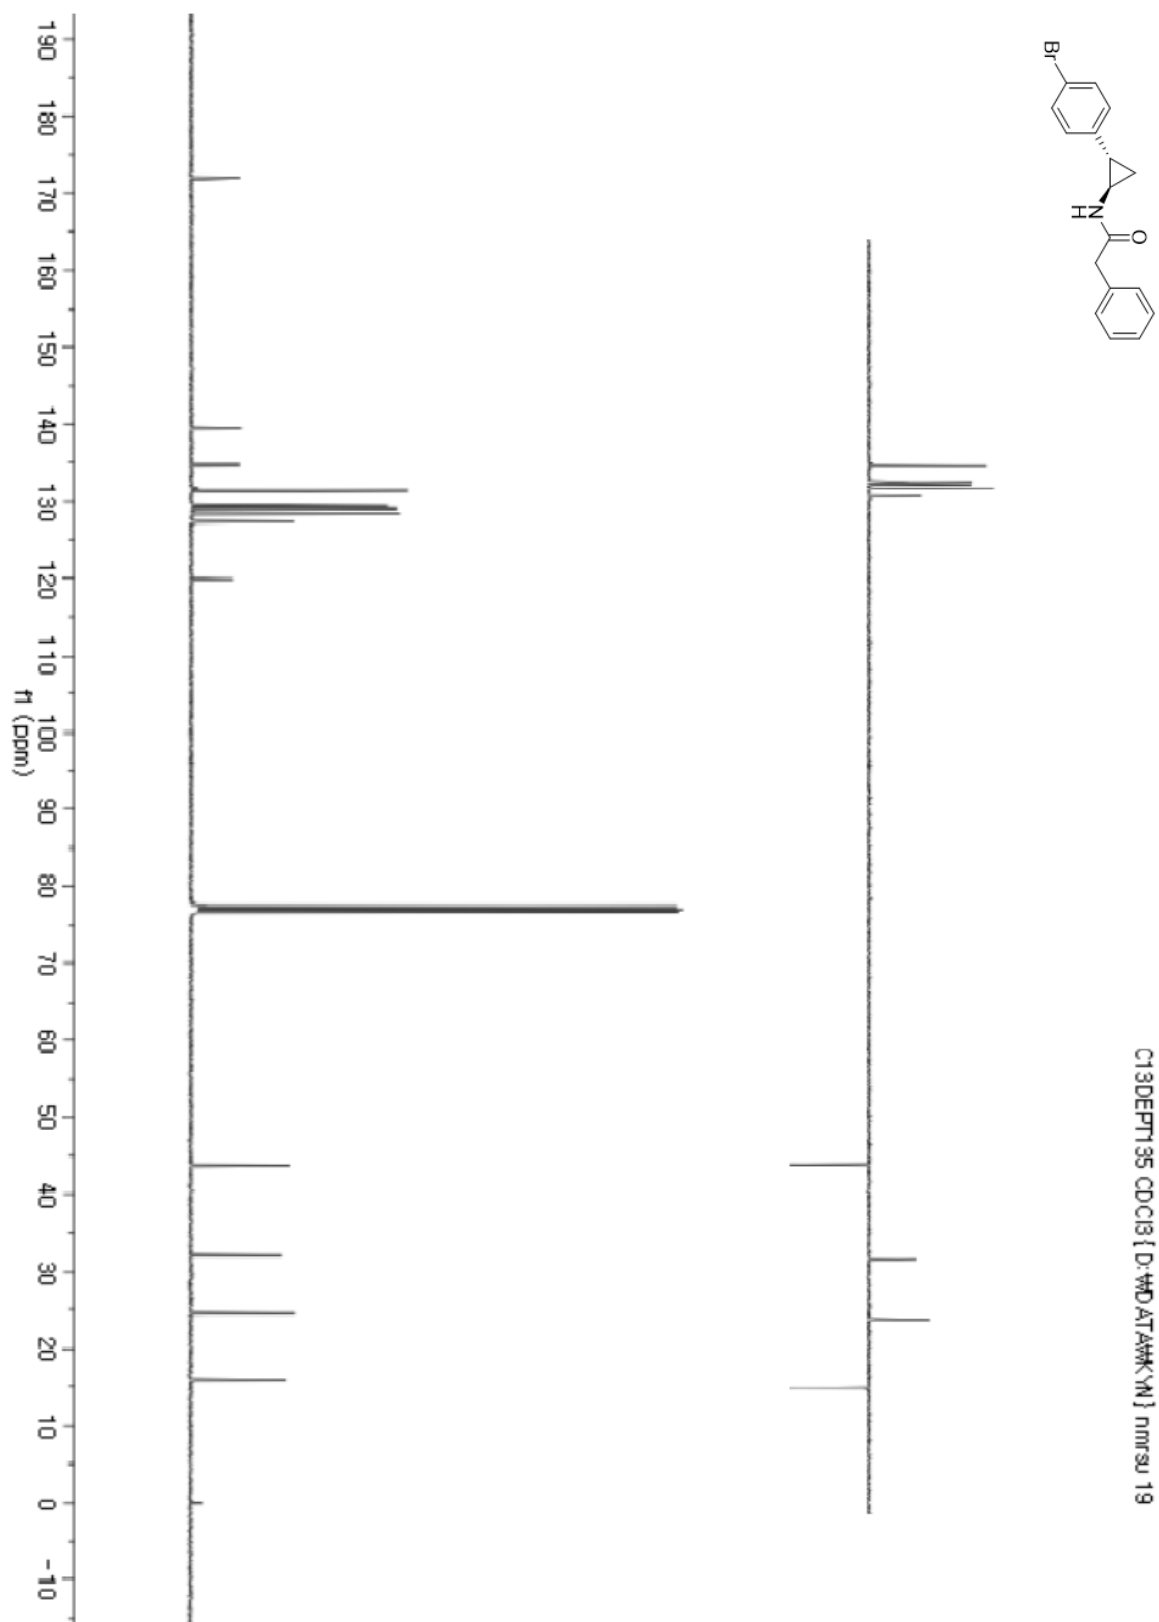

Figure 69.  $^1\text{H}$  NMR ( $\text{CDCl}_3$ ) of **11d**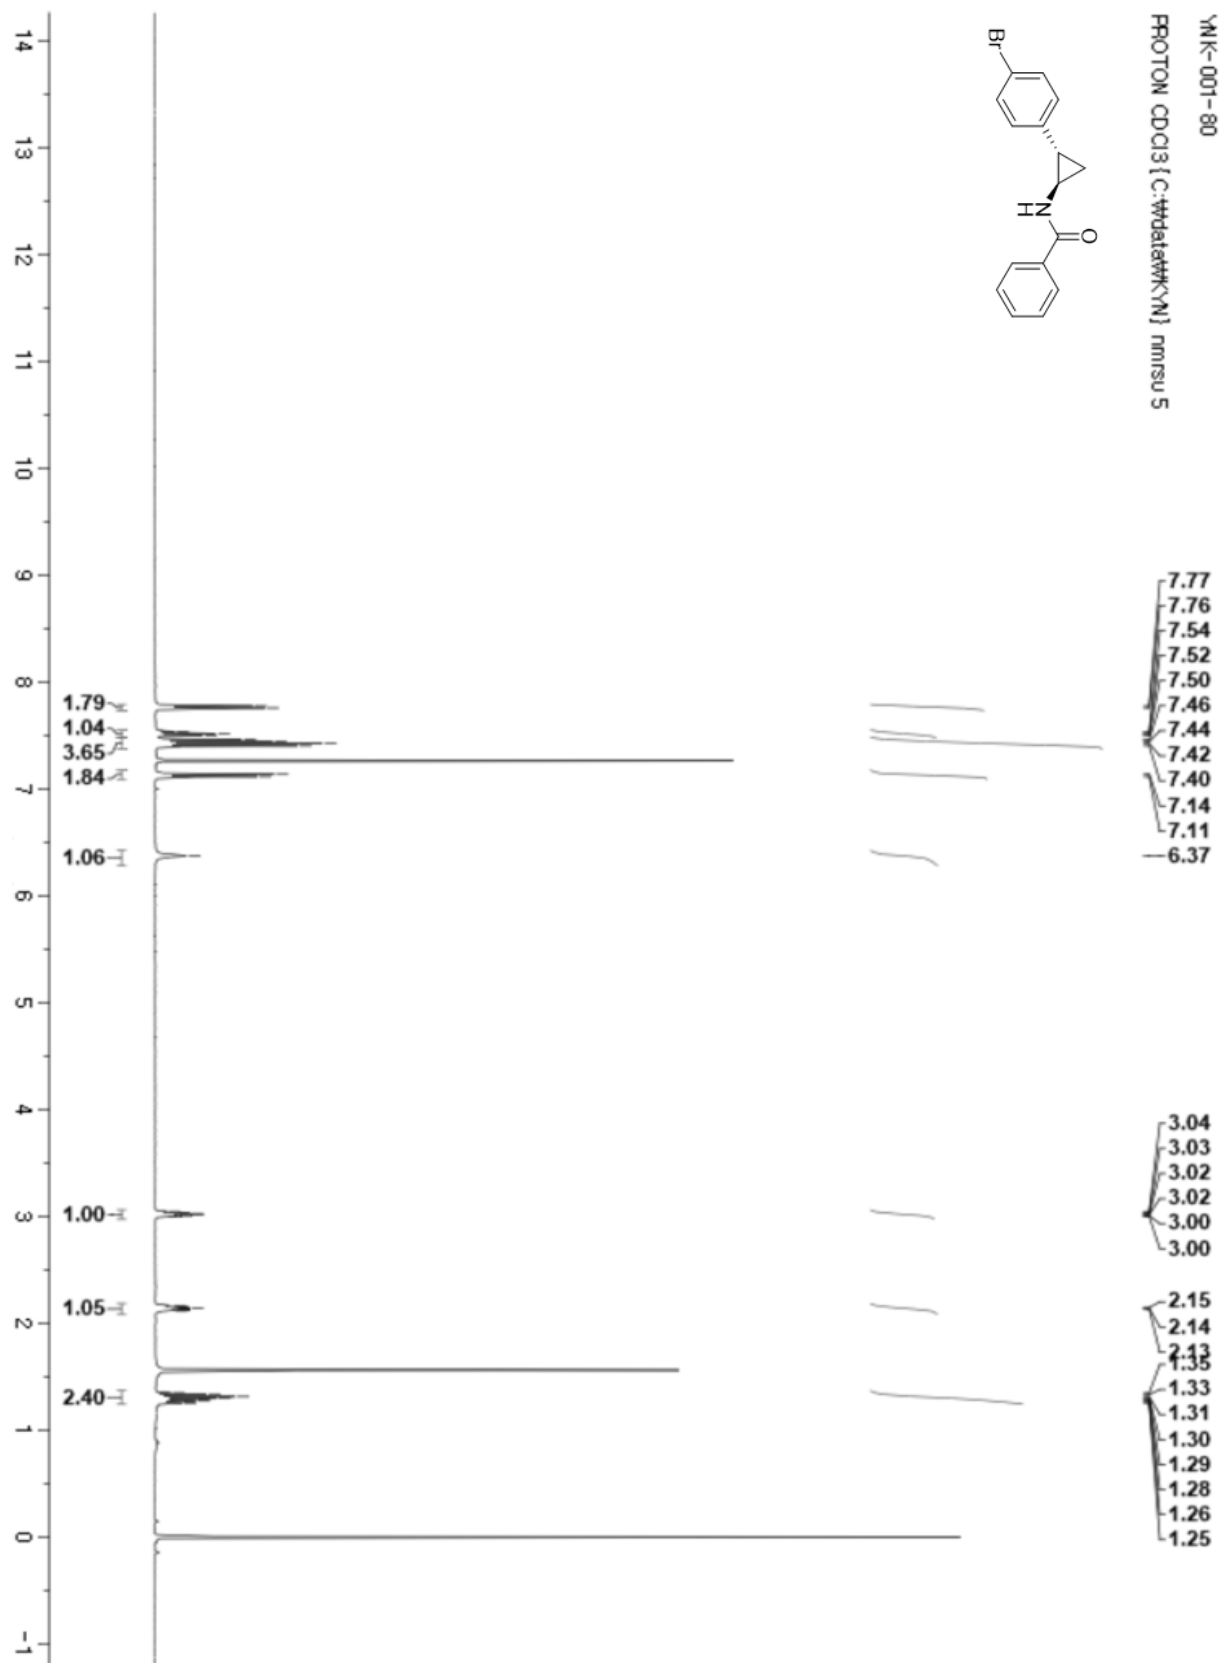

**Figure 70.**  $^{13}\text{C}$  NMR ( $\text{CDCl}_3$ ) of **11d**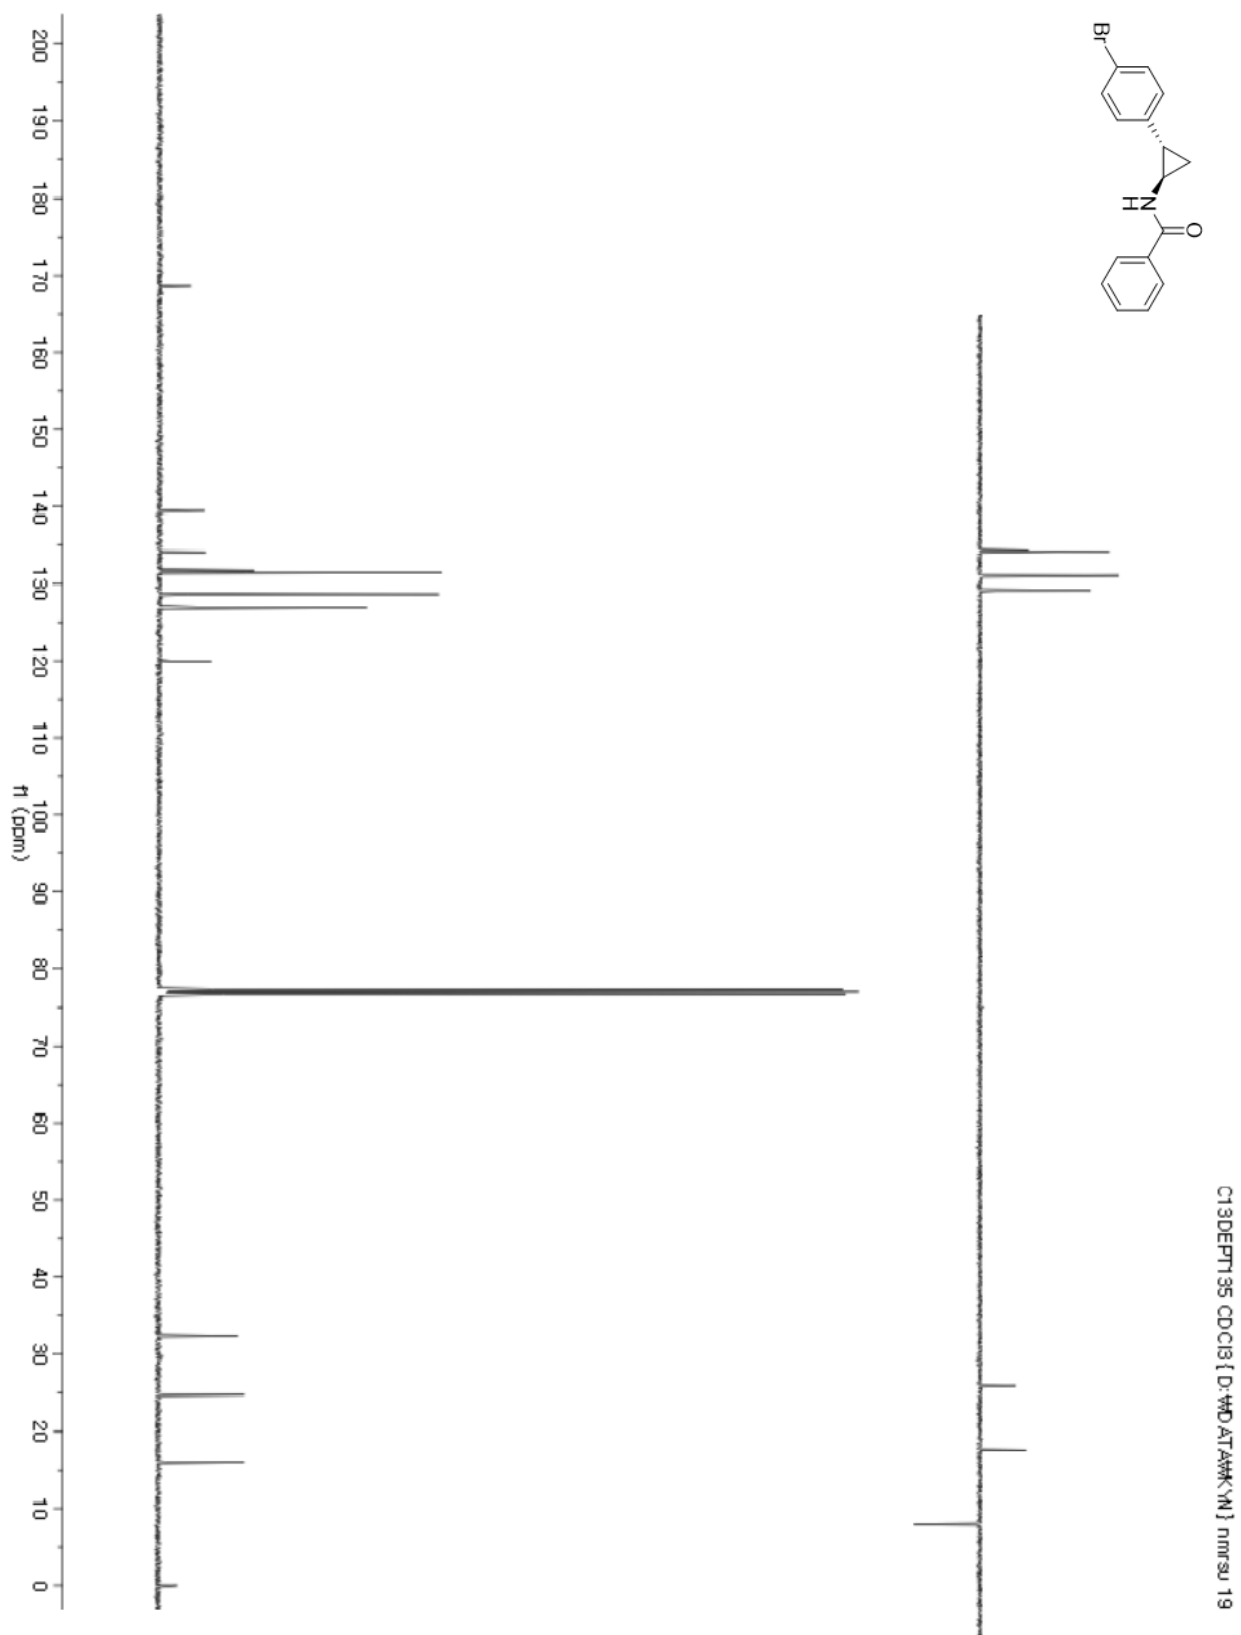

Figure 71.  $^1\text{H}$  NMR ( $\text{CDCl}_3$ ) of **11e**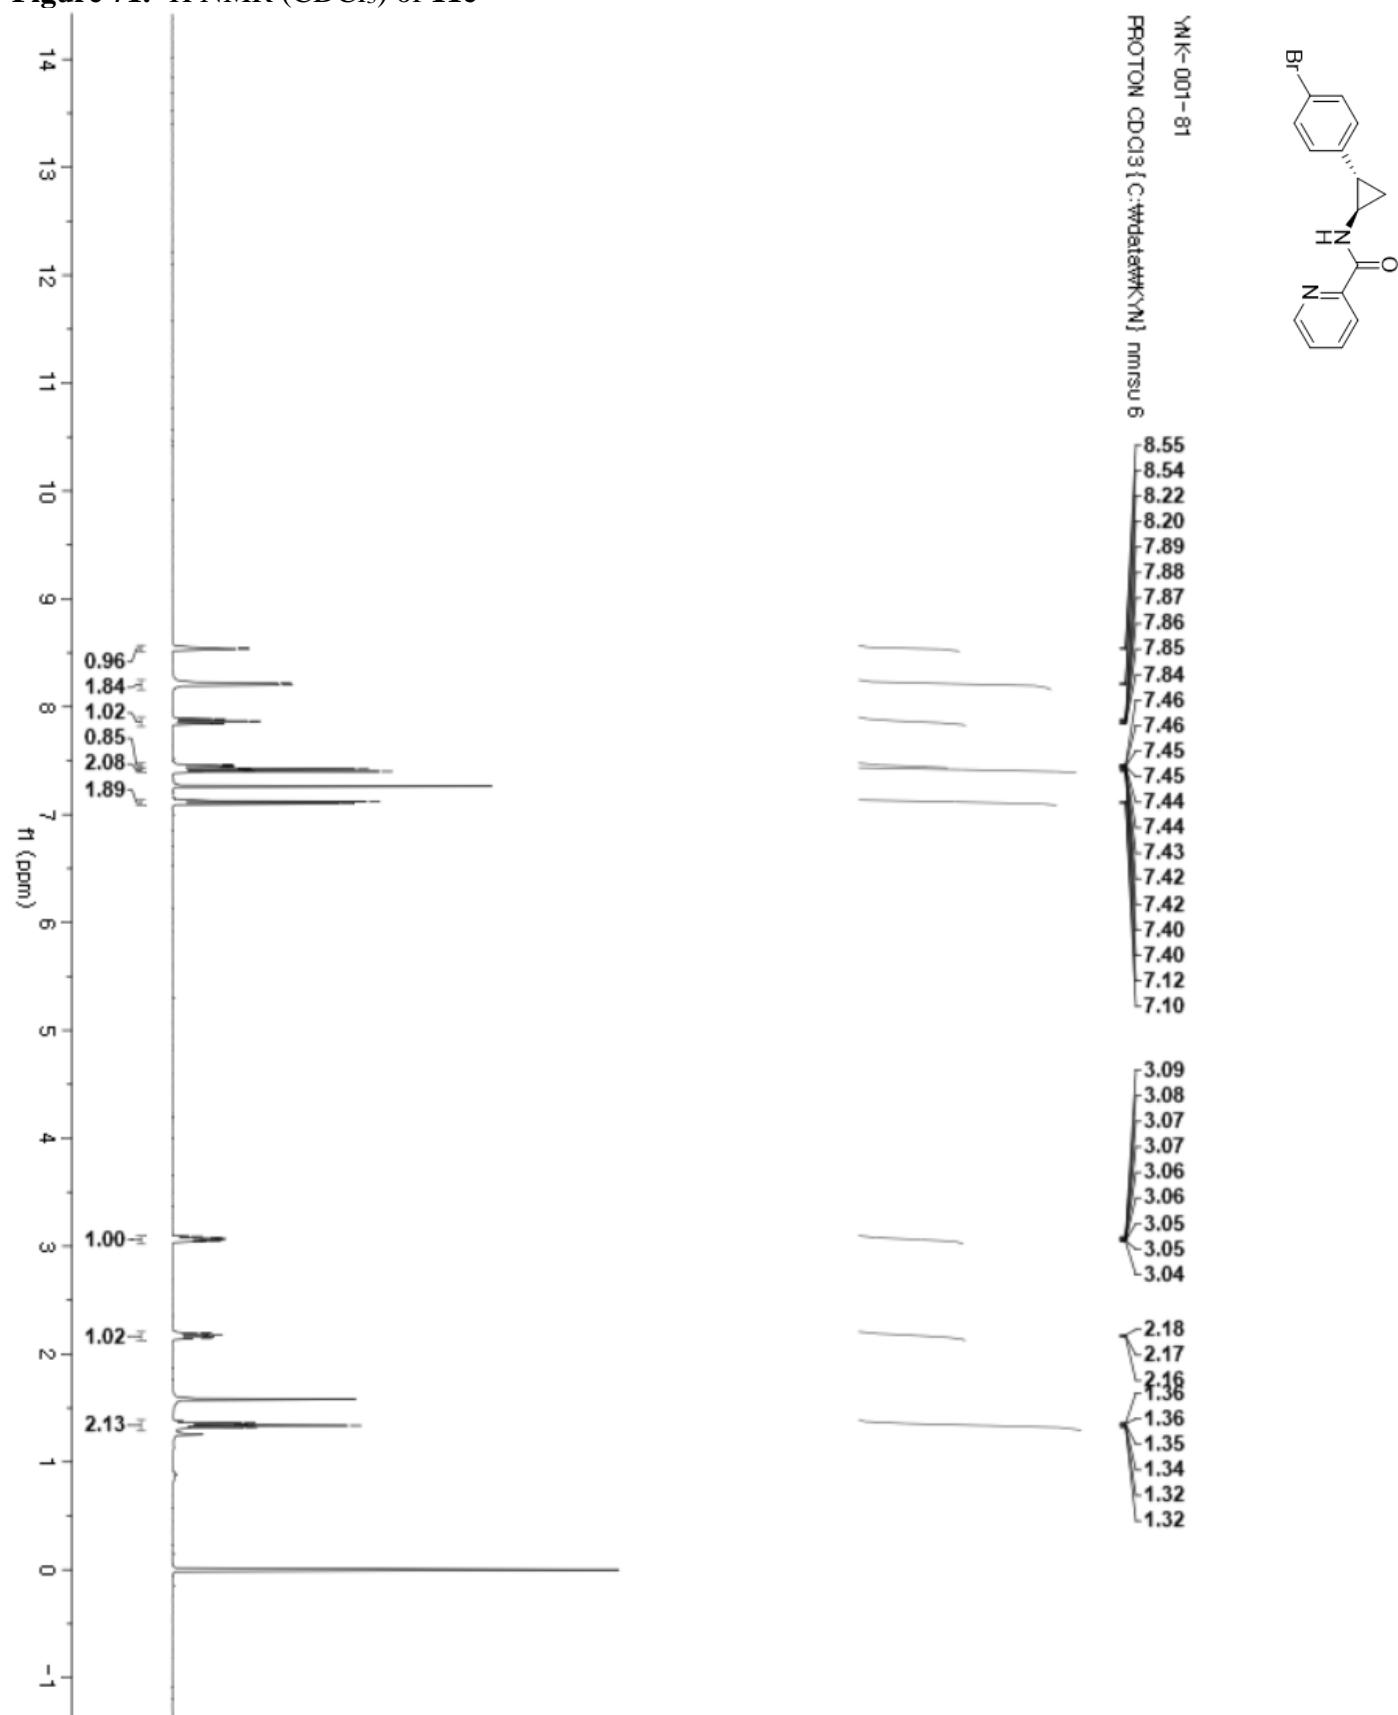

**Figure 72.**  $^{13}\text{C}$  NMR ( $\text{CDCl}_3$ ) of **11e**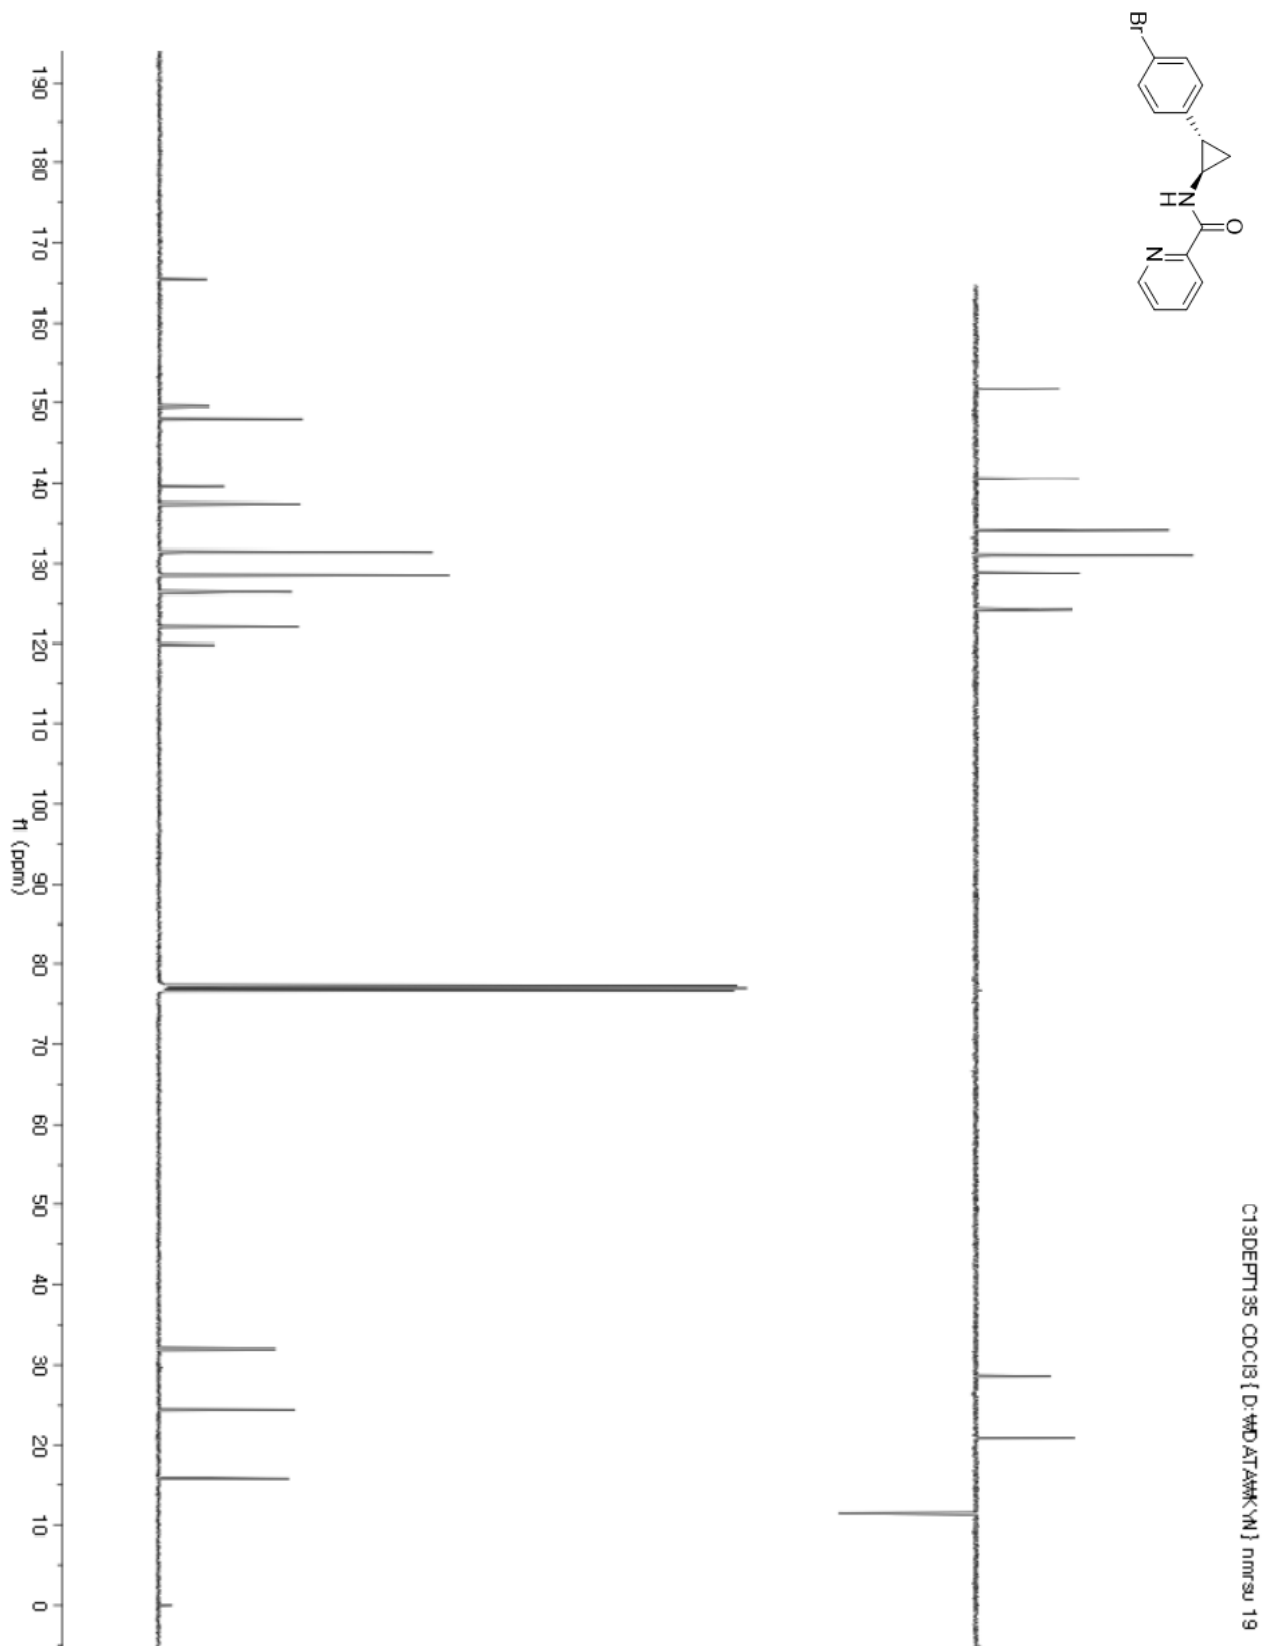



Figure 73.  $^1\text{H}$  NMR ( $\text{CDCl}_3$ ) of **11f**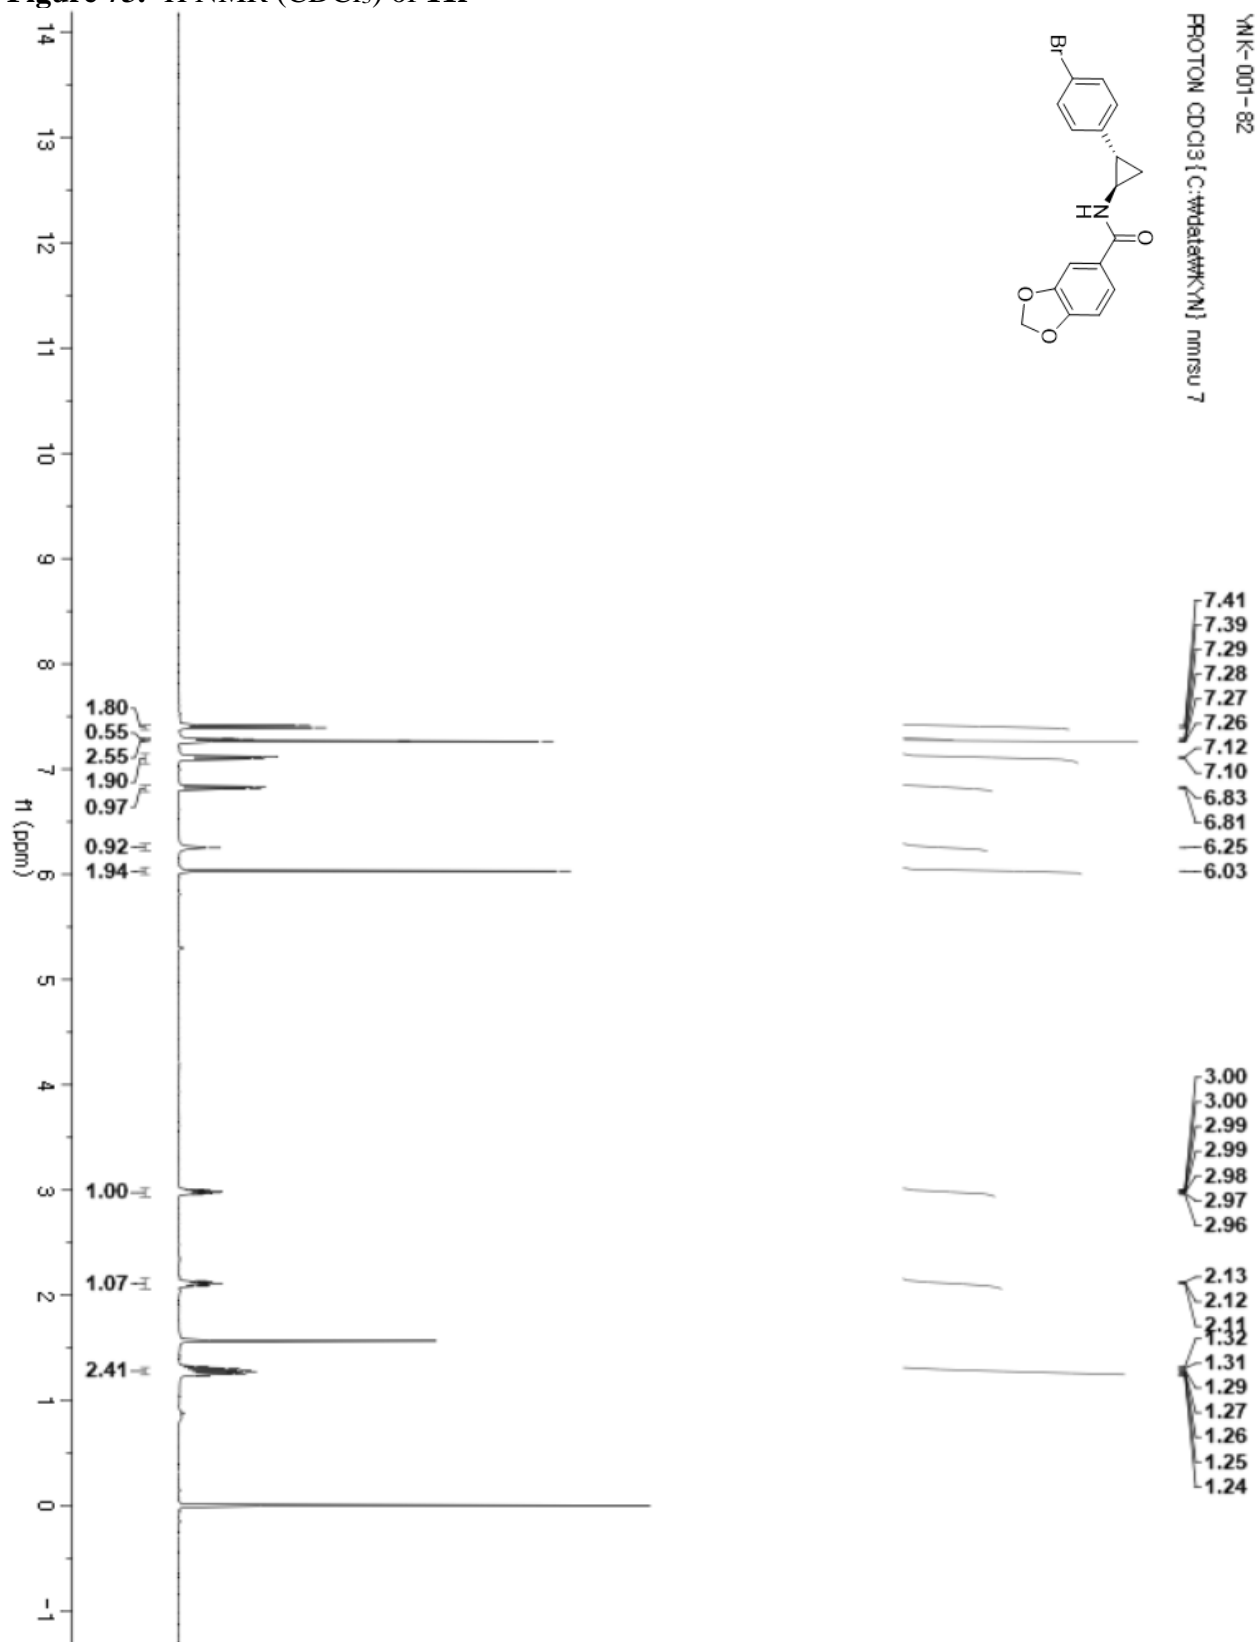

**Figure 74.**  $^{13}\text{C}$  NMR ( $\text{CDCl}_3$ ) of **11f**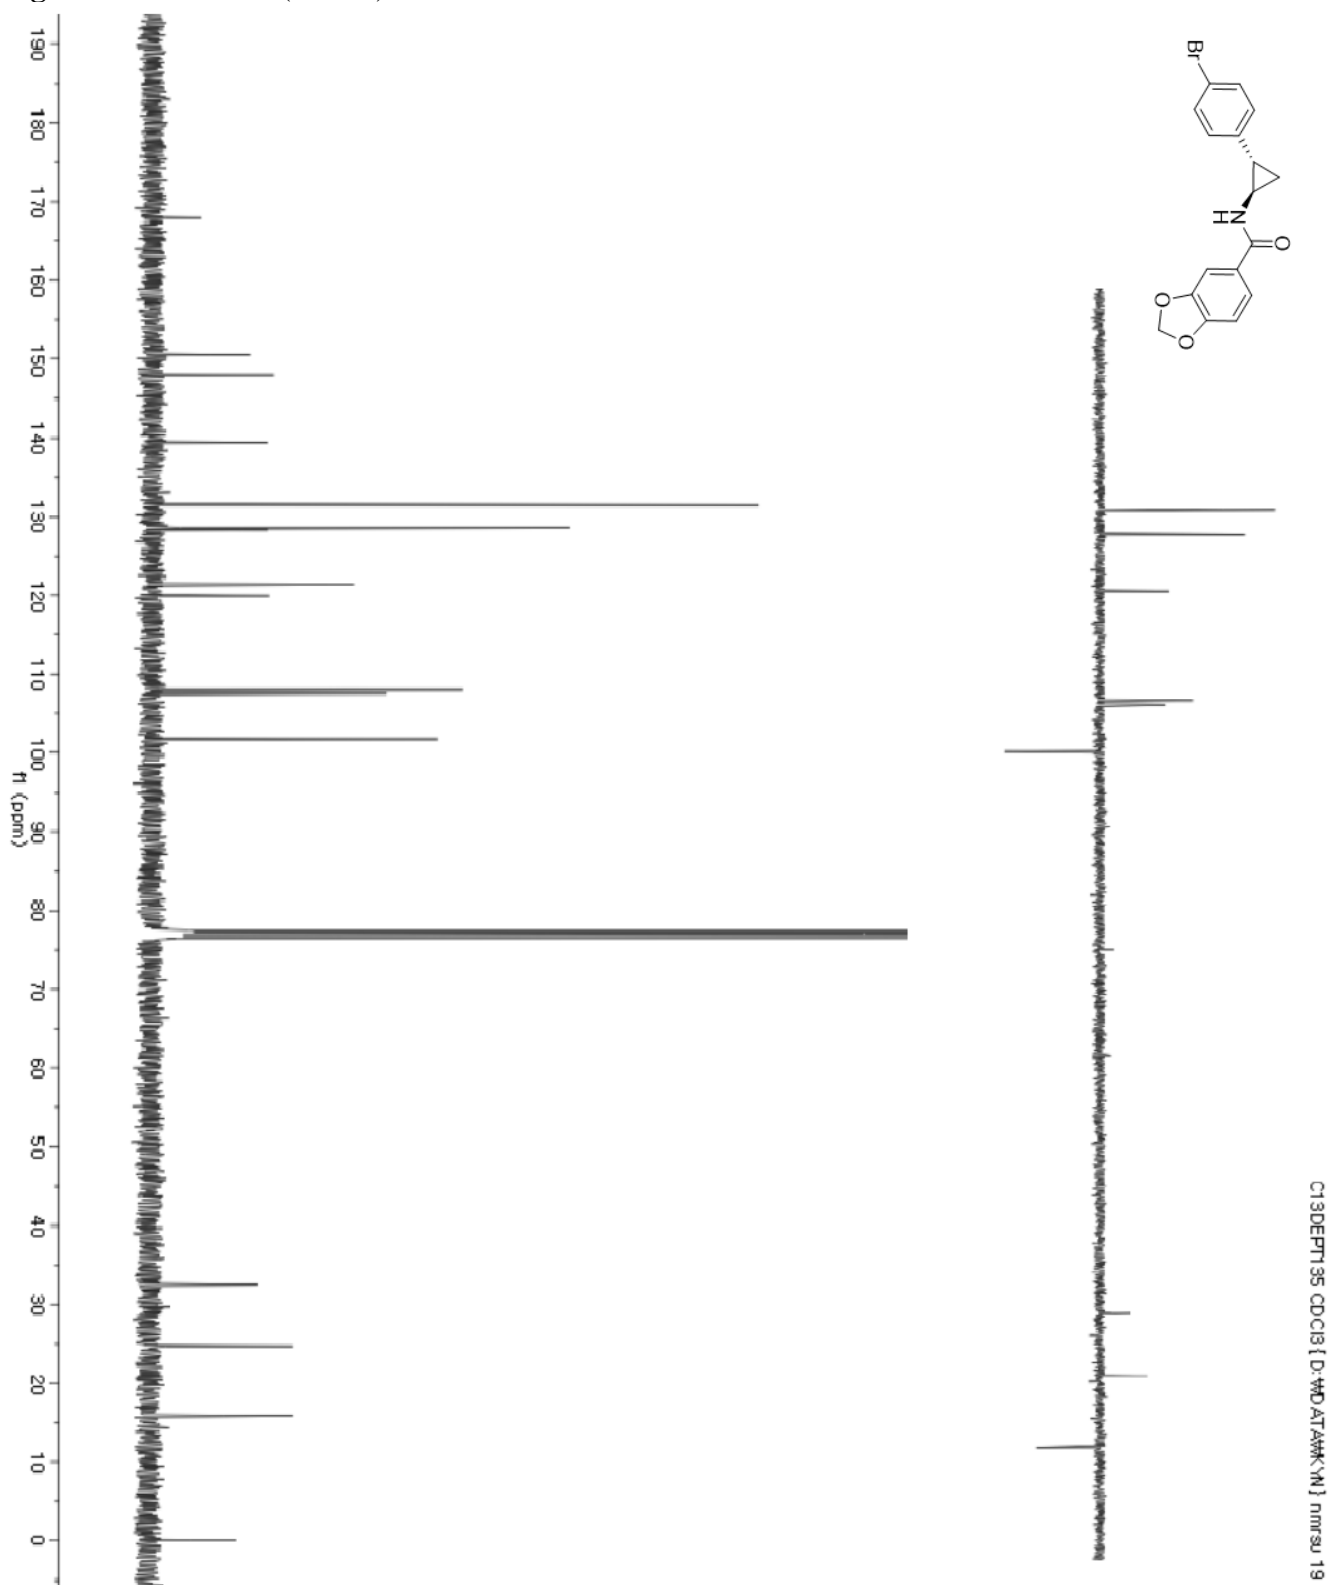

Figure 75.  $^1\text{H}$  NMR ( $\text{CDCl}_3$ ) of **11g**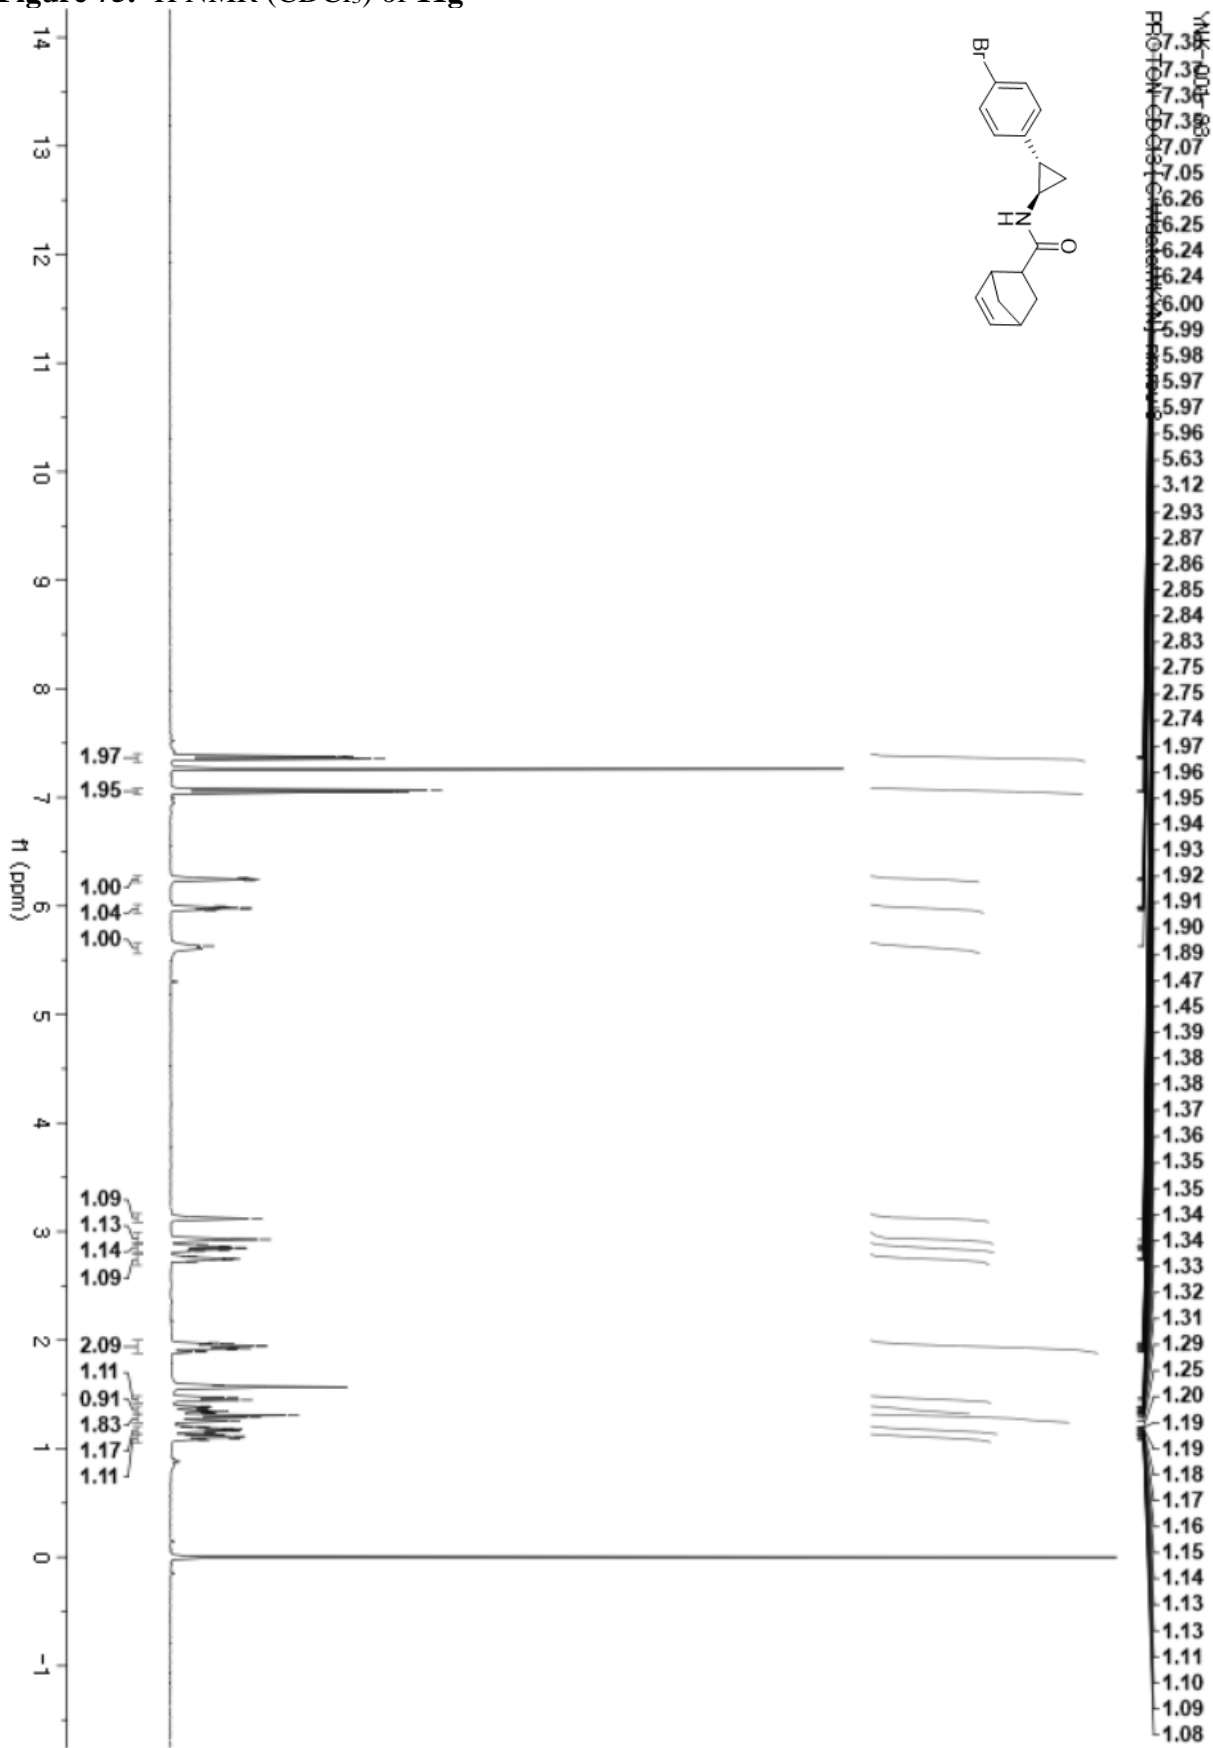

**Figure 76.**  $^{13}\text{C}$  NMR ( $\text{CDCl}_3$ ) of **11g**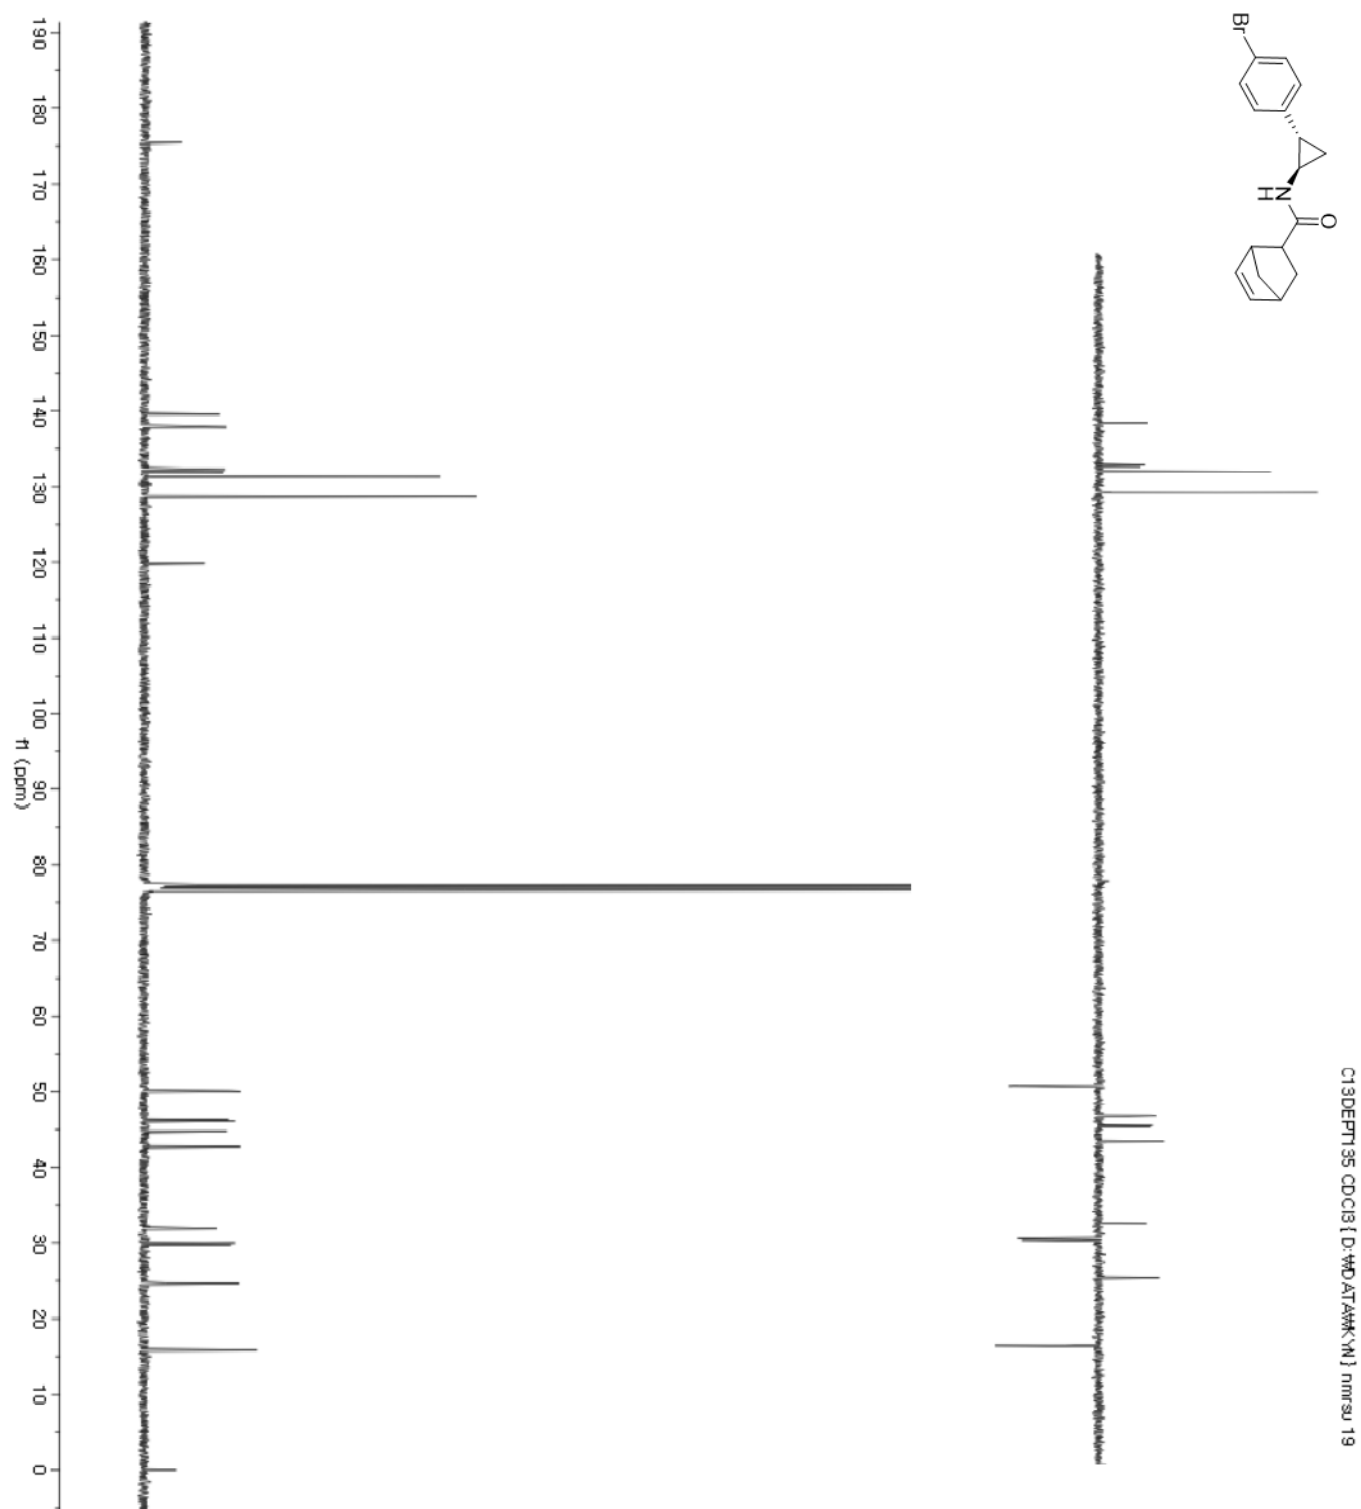

Figure 77.  $^1\text{H}$  NMR ( $\text{CDCl}_3$ ) of **11h**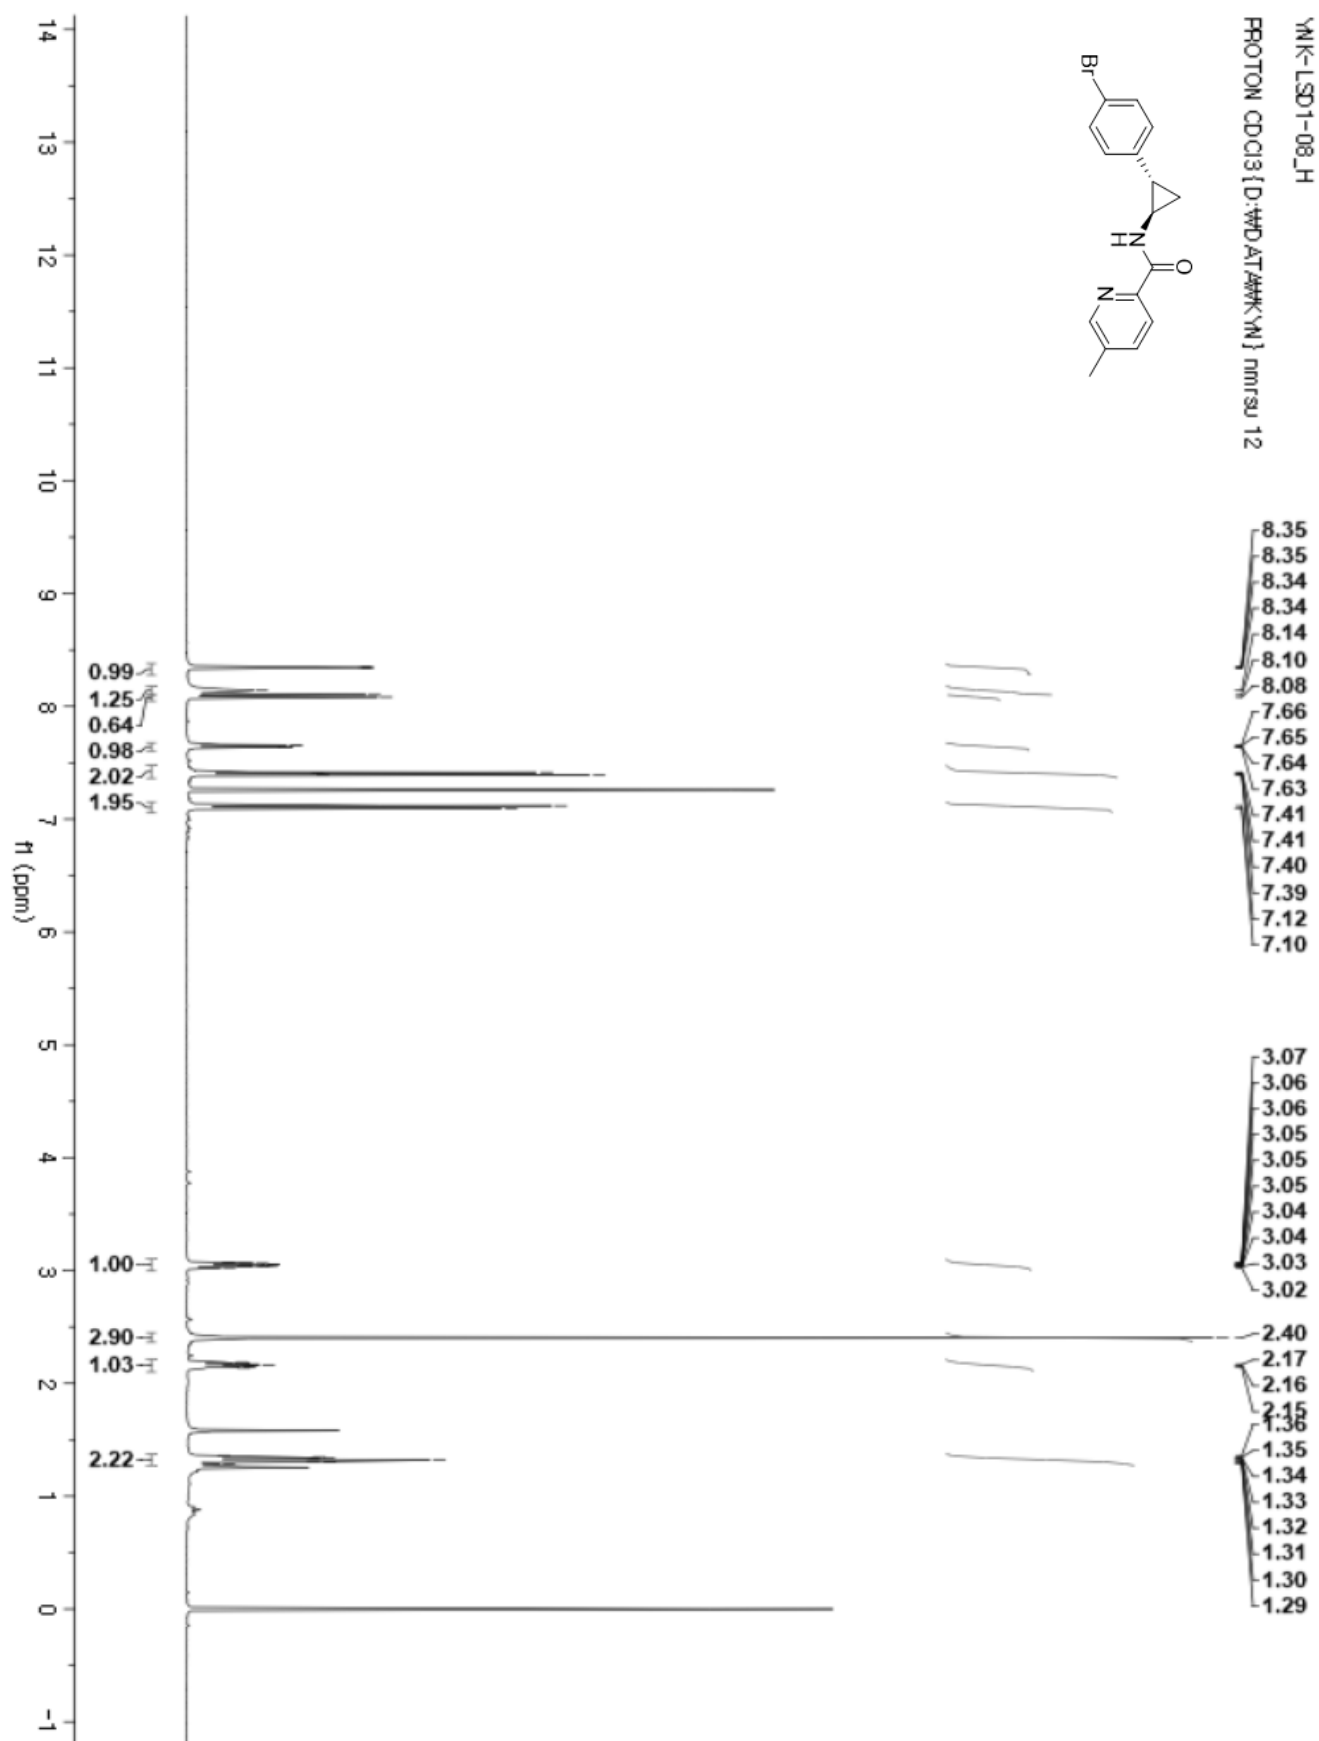

**Figure 78.**  $^{13}\text{C}$  NMR ( $\text{CDCl}_3$ ) of **11h**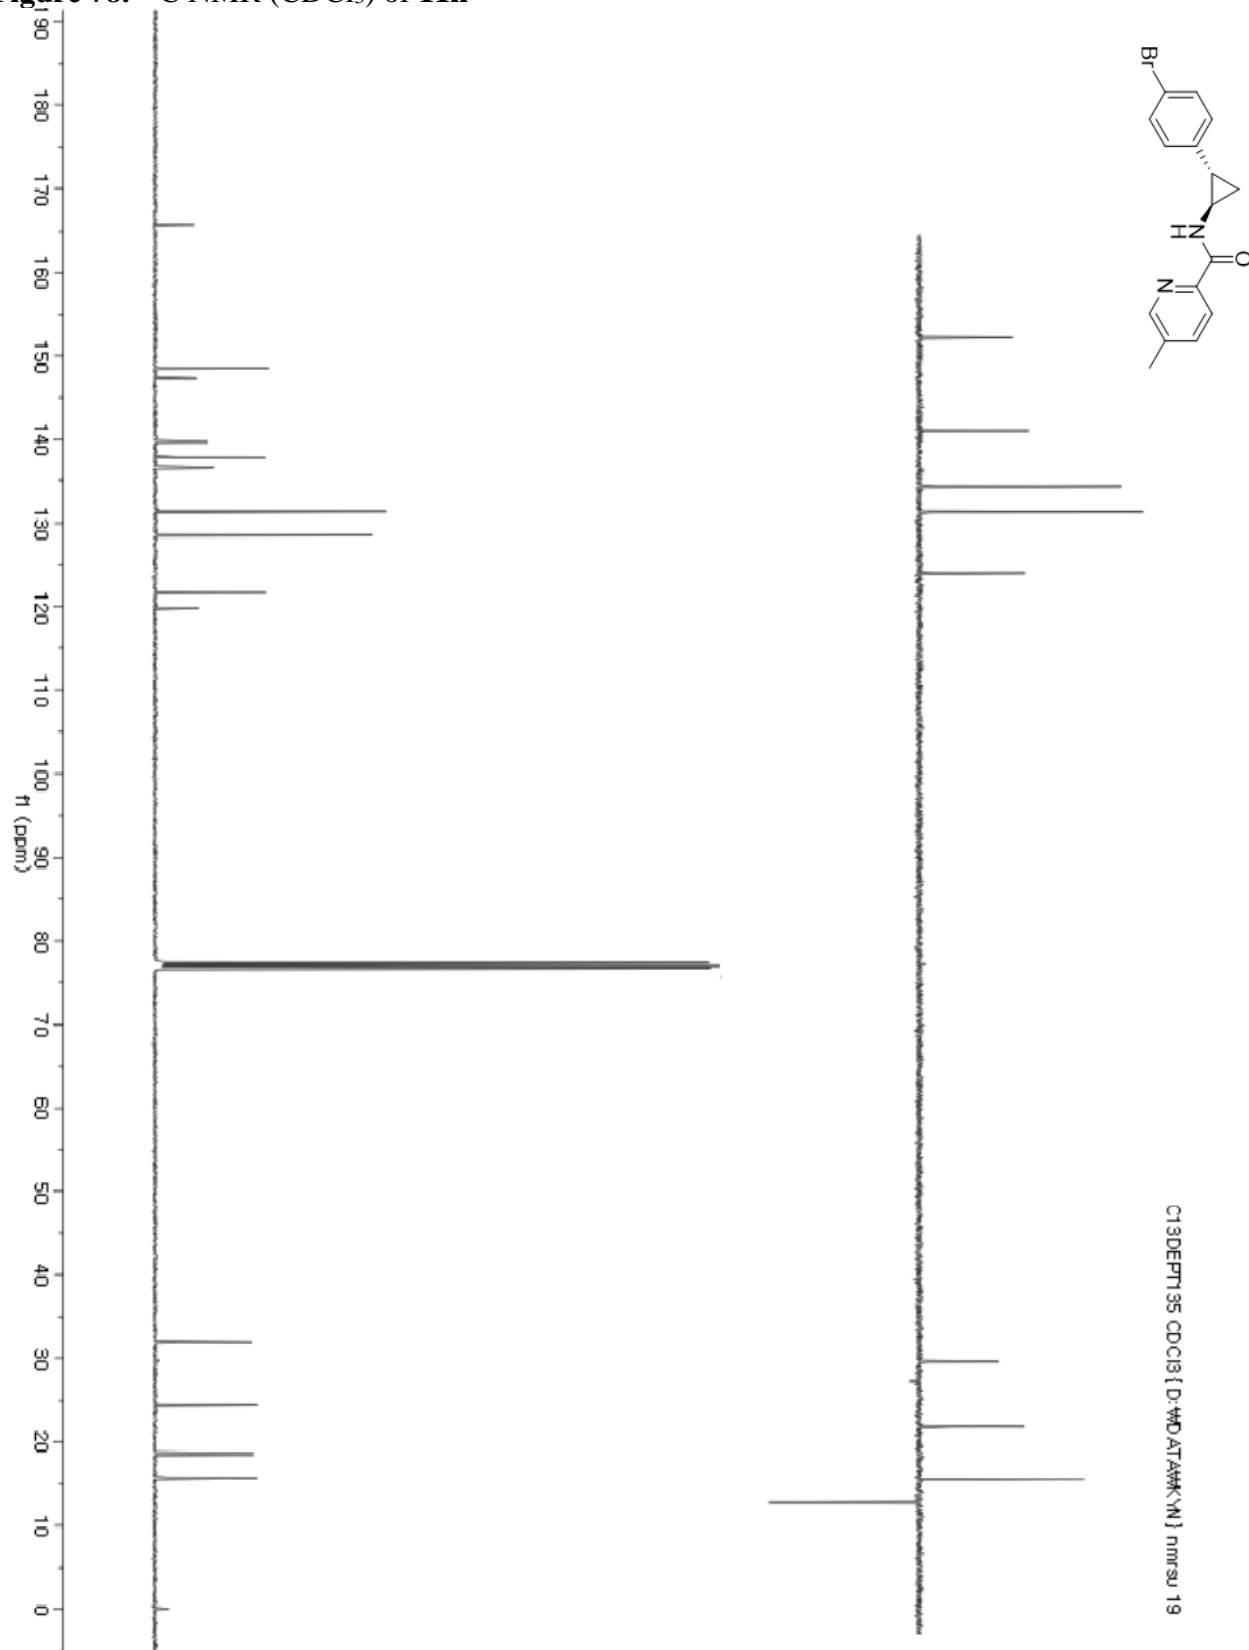

Figure 79.  $^1\text{H}$  NMR ( $\text{CDCl}_3$ ) of **11i**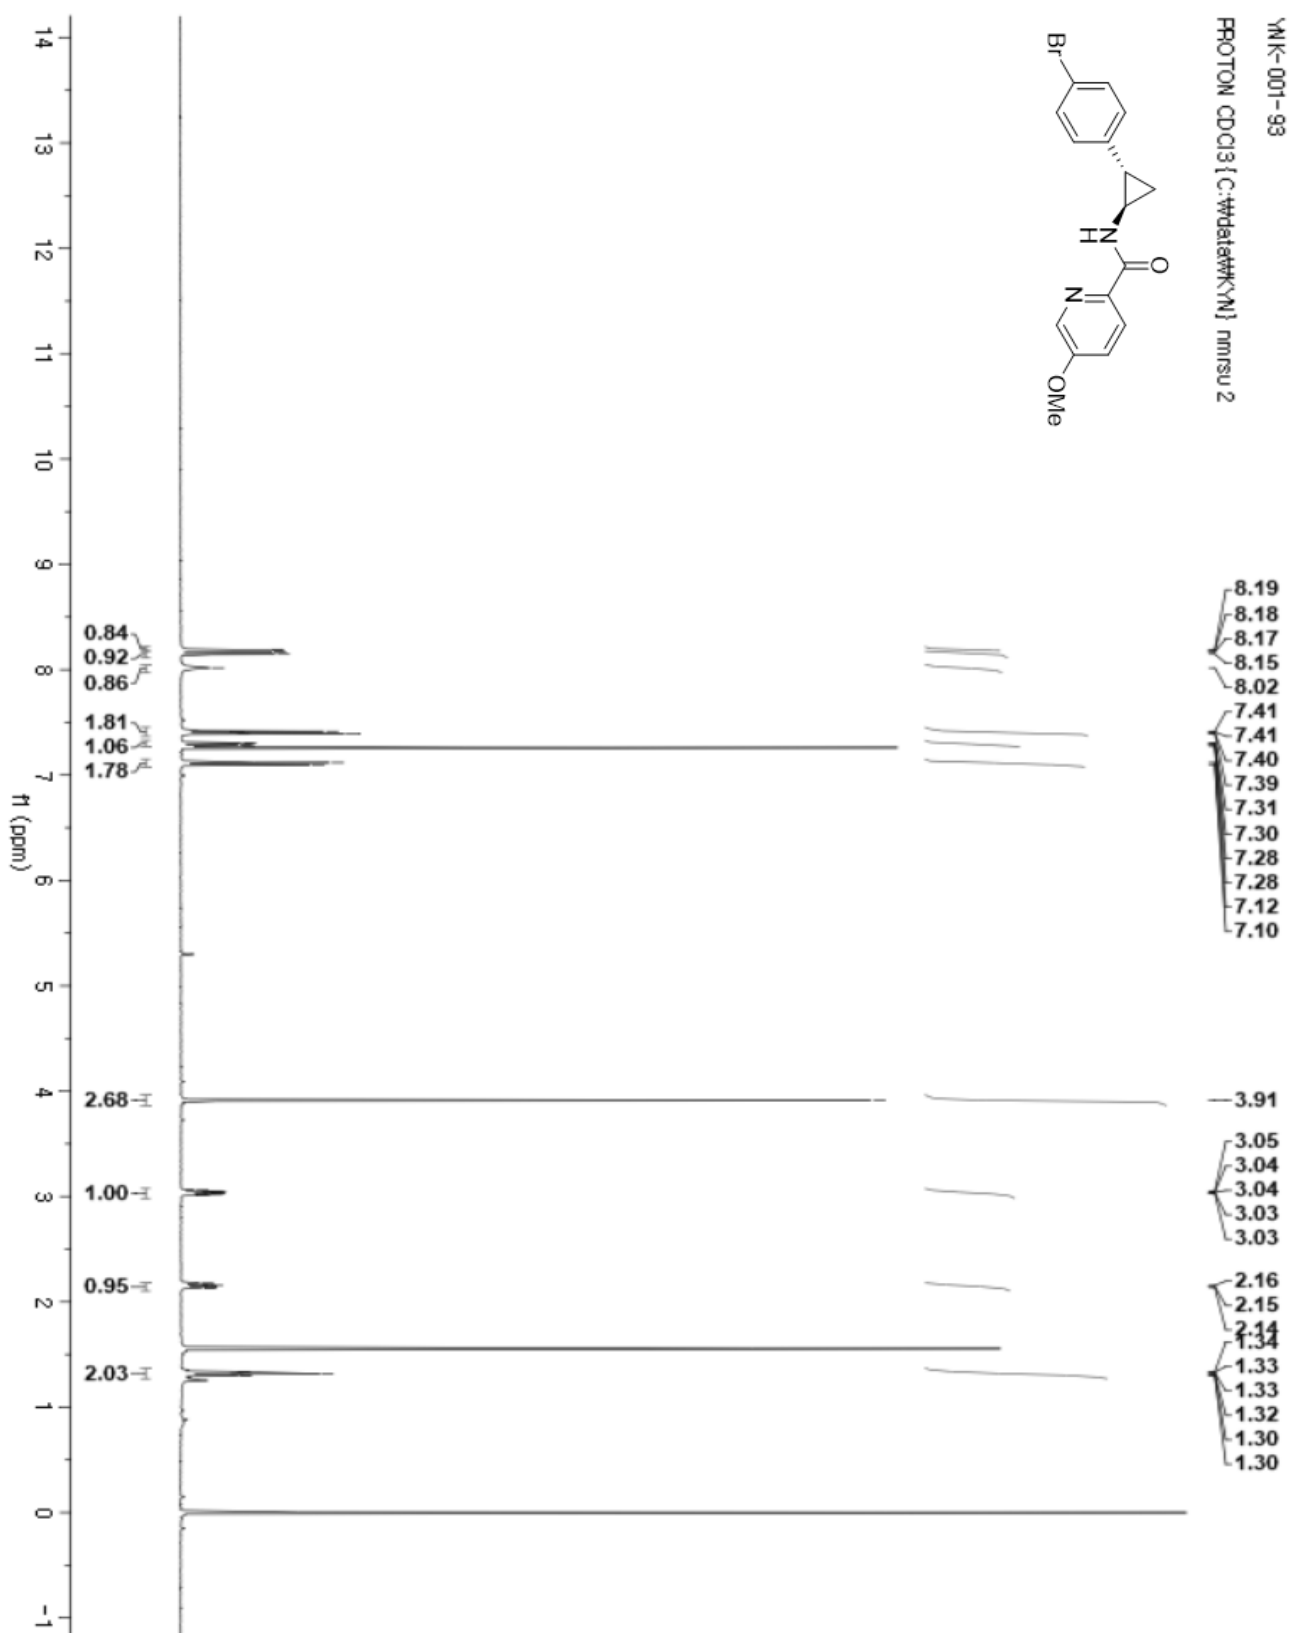

**Figure 80.**  $^{13}\text{C}$  NMR ( $\text{CDCl}_3$ ) of **11i**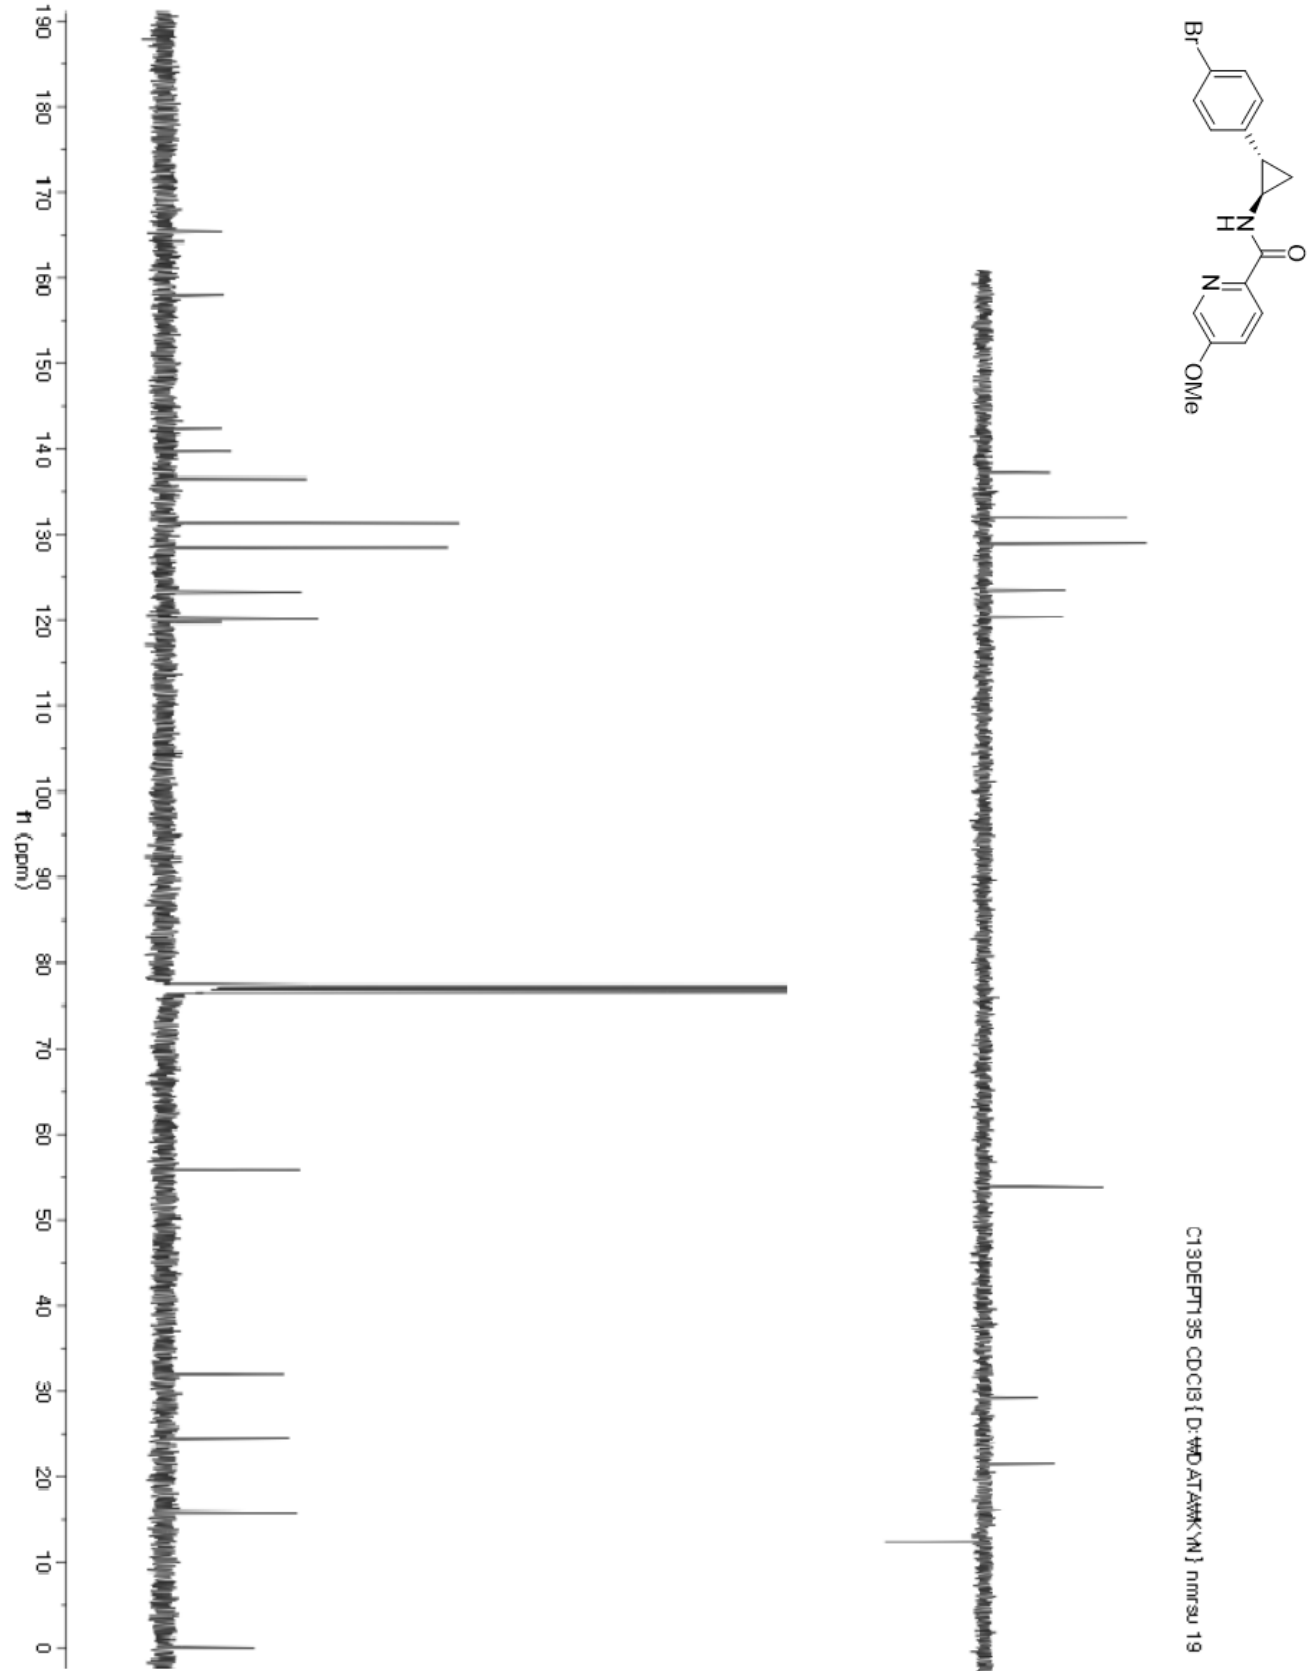



Figure 81.  $^1\text{H}$  NMR ( $\text{CDCl}_3$ ) of **11j**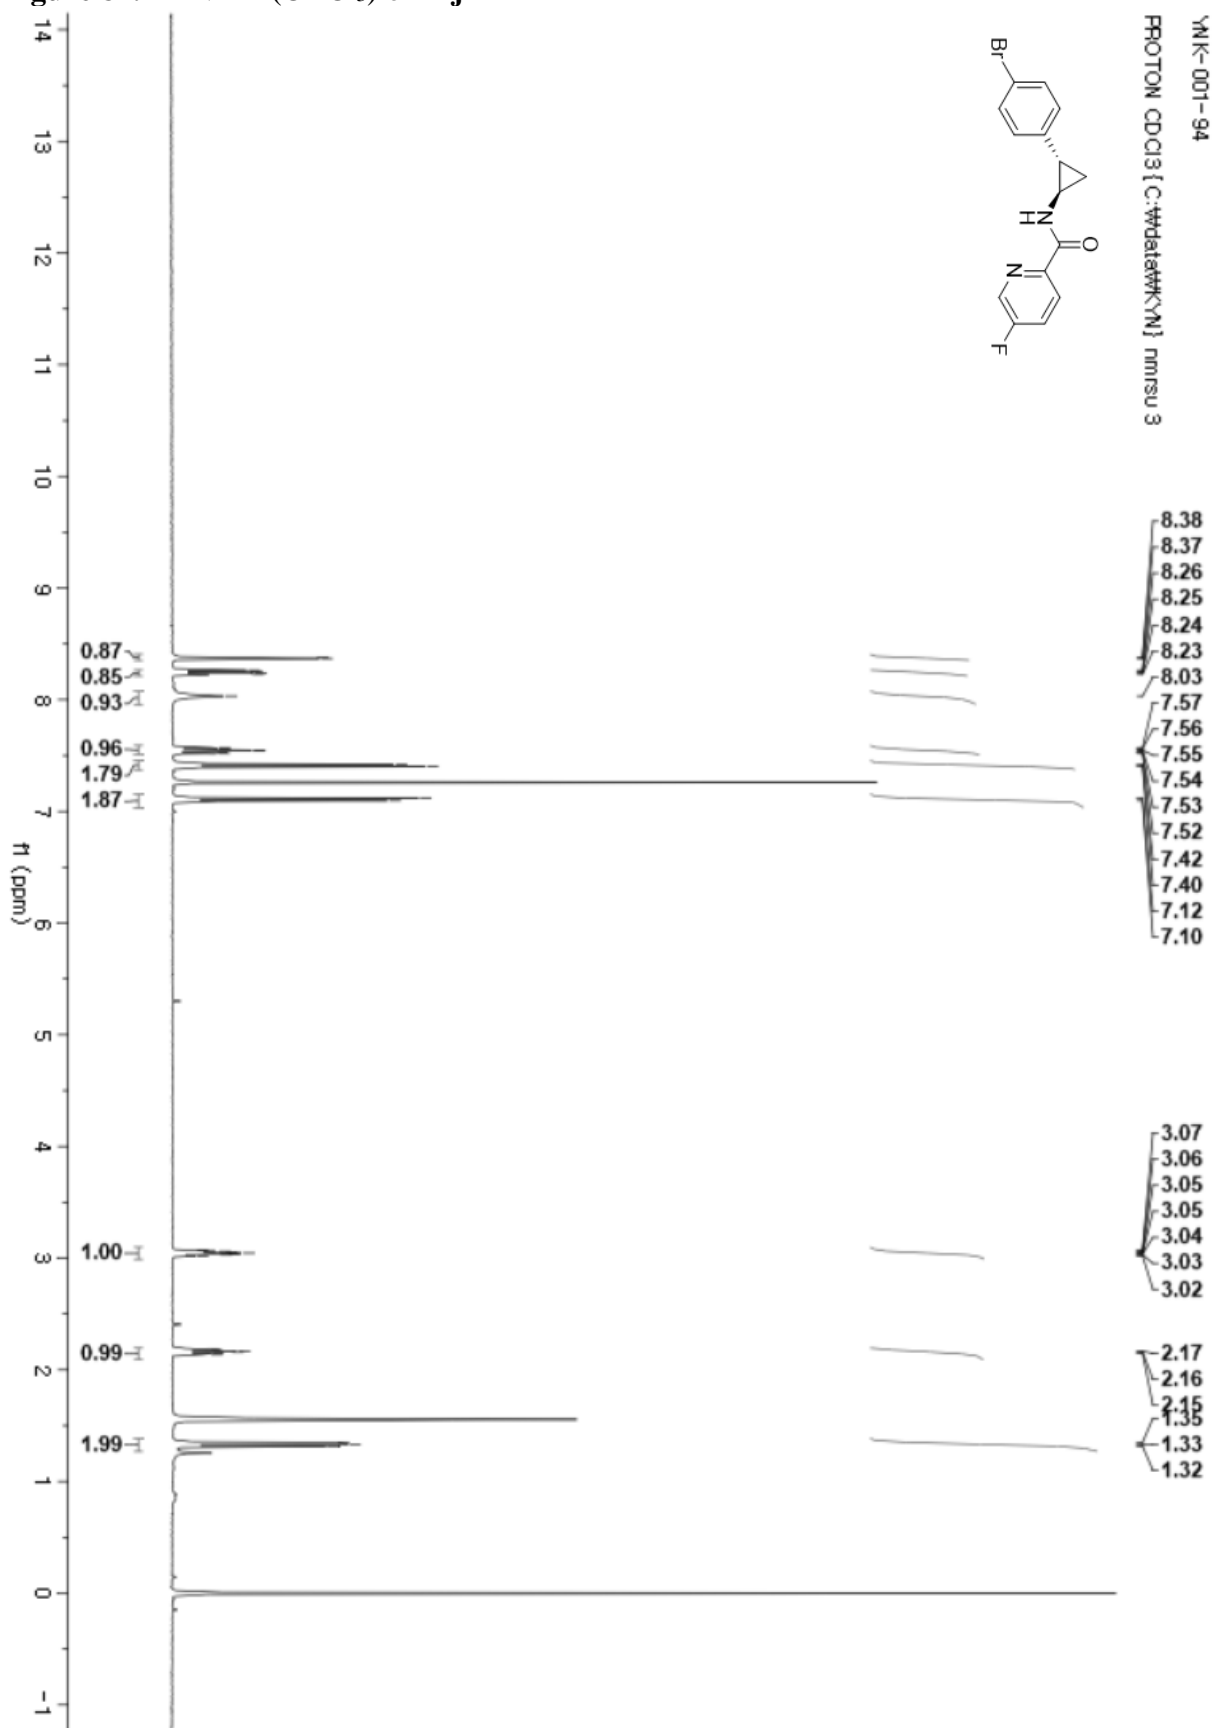

**Figure 82.**  $^{13}\text{C}$  NMR ( $\text{CDCl}_3$ ) of **11j**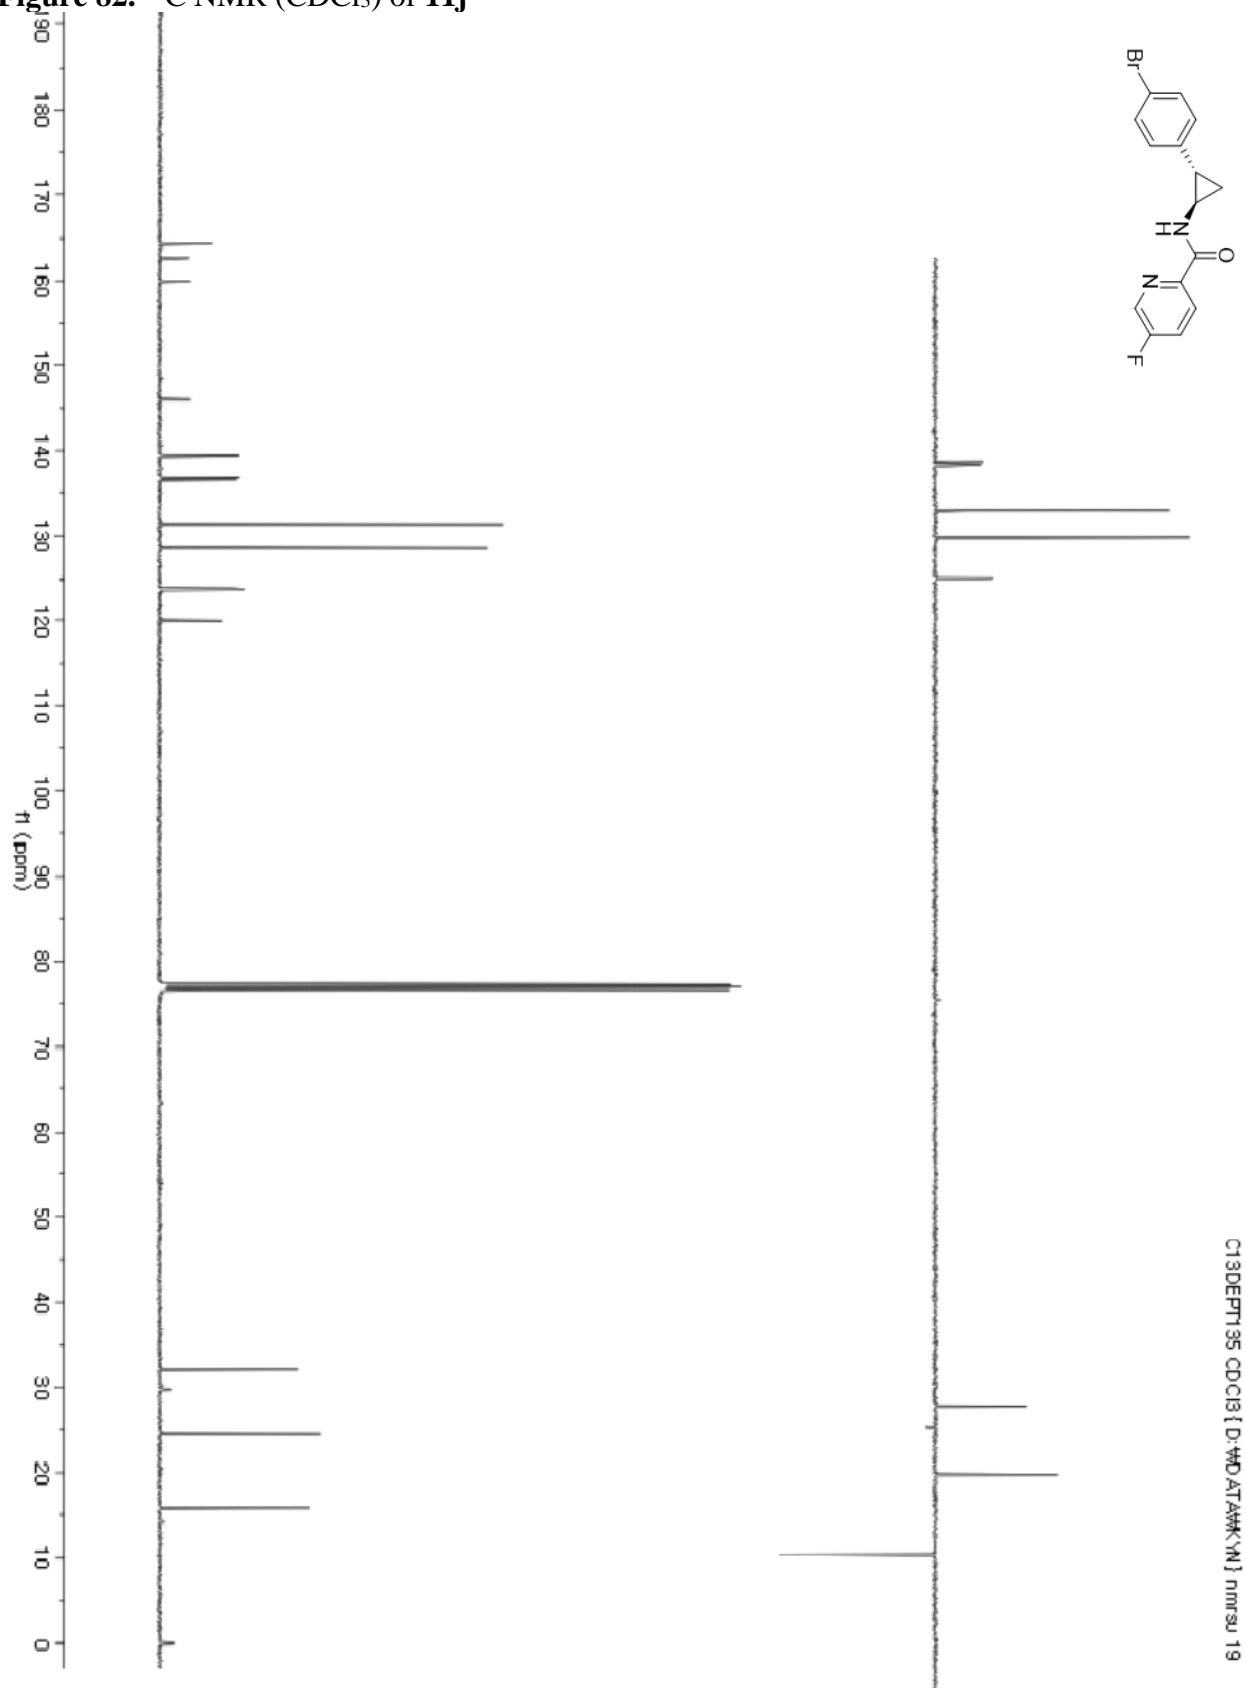

C13DEPT135 CDCl3 [D:\HD\ATANK\N1] nmrsu 19

**Figure 83.**  $^{19}\text{F}$  NMR ( $\text{CDCl}_3$ ) of **11j**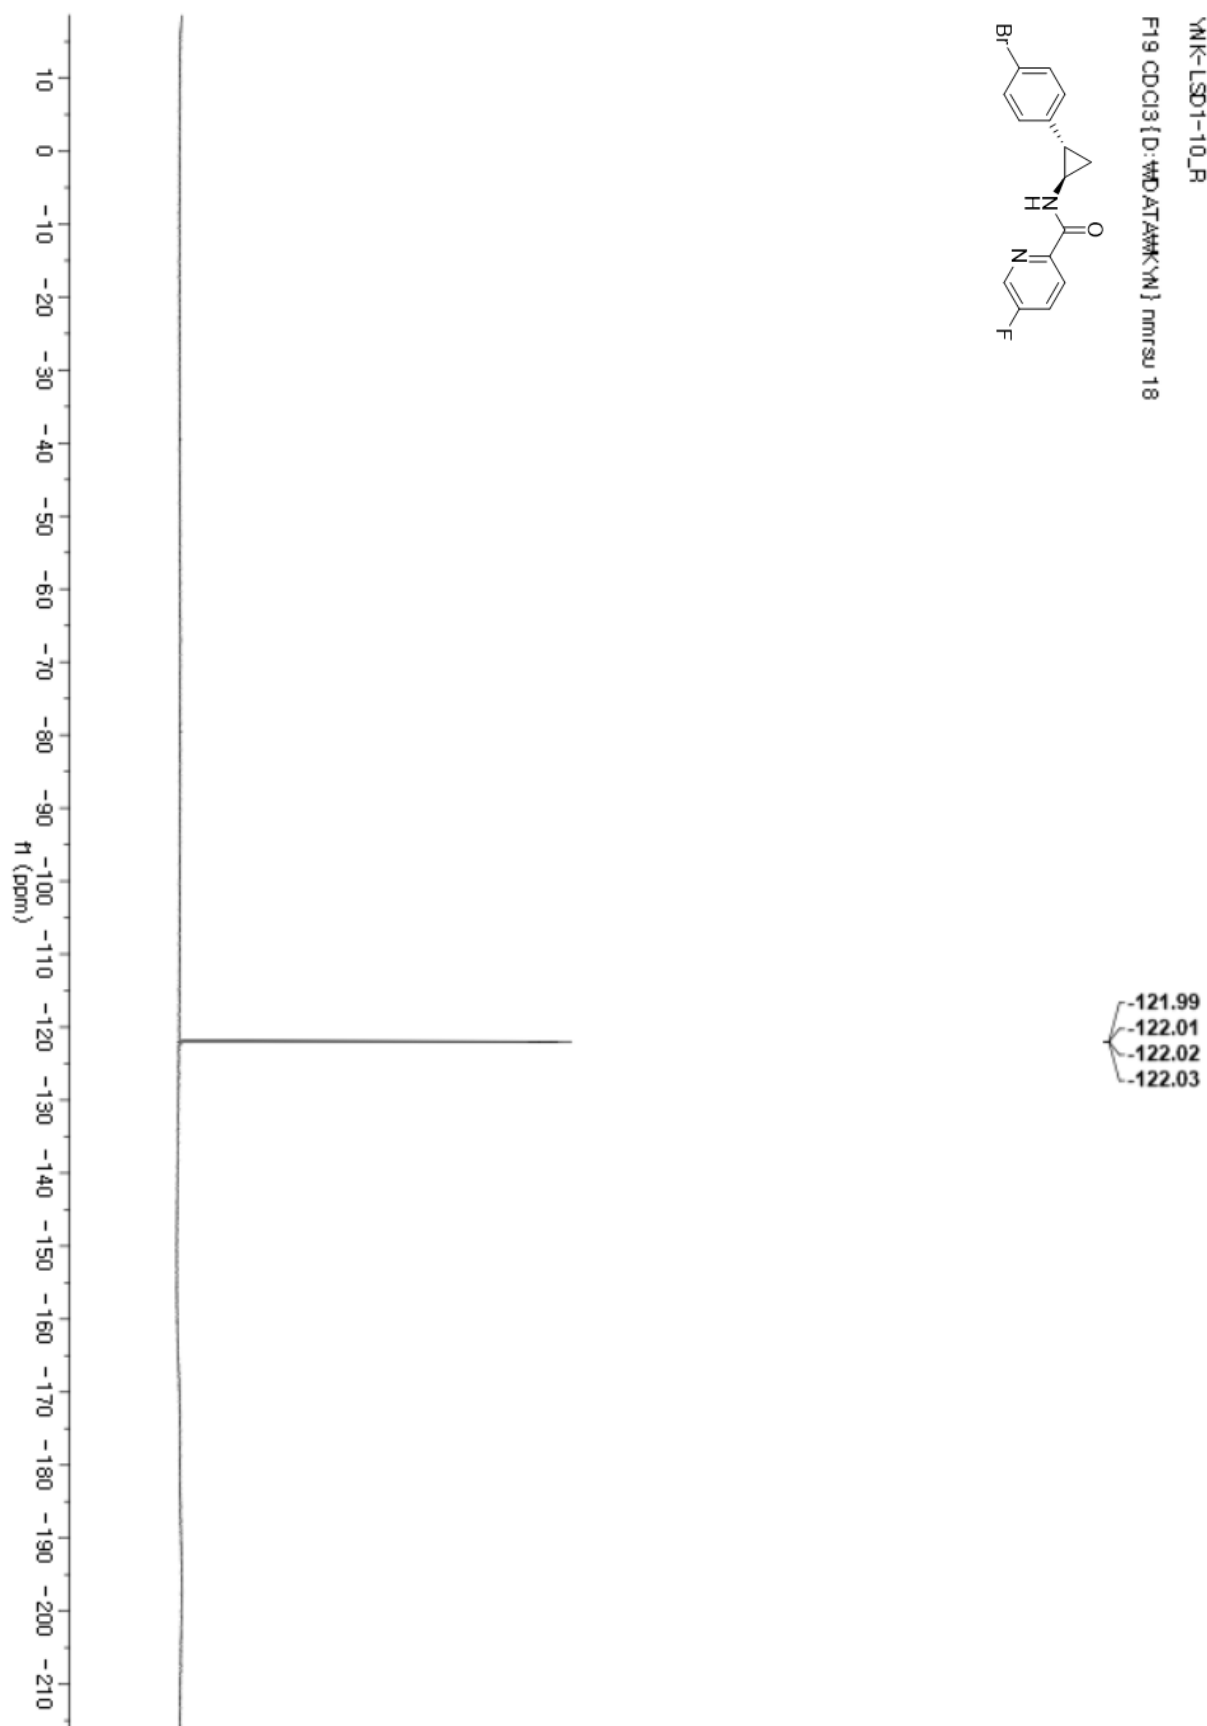

Figure 84.  $^1\text{H}$  NMR ( $\text{CDCl}_3$ ) of 11k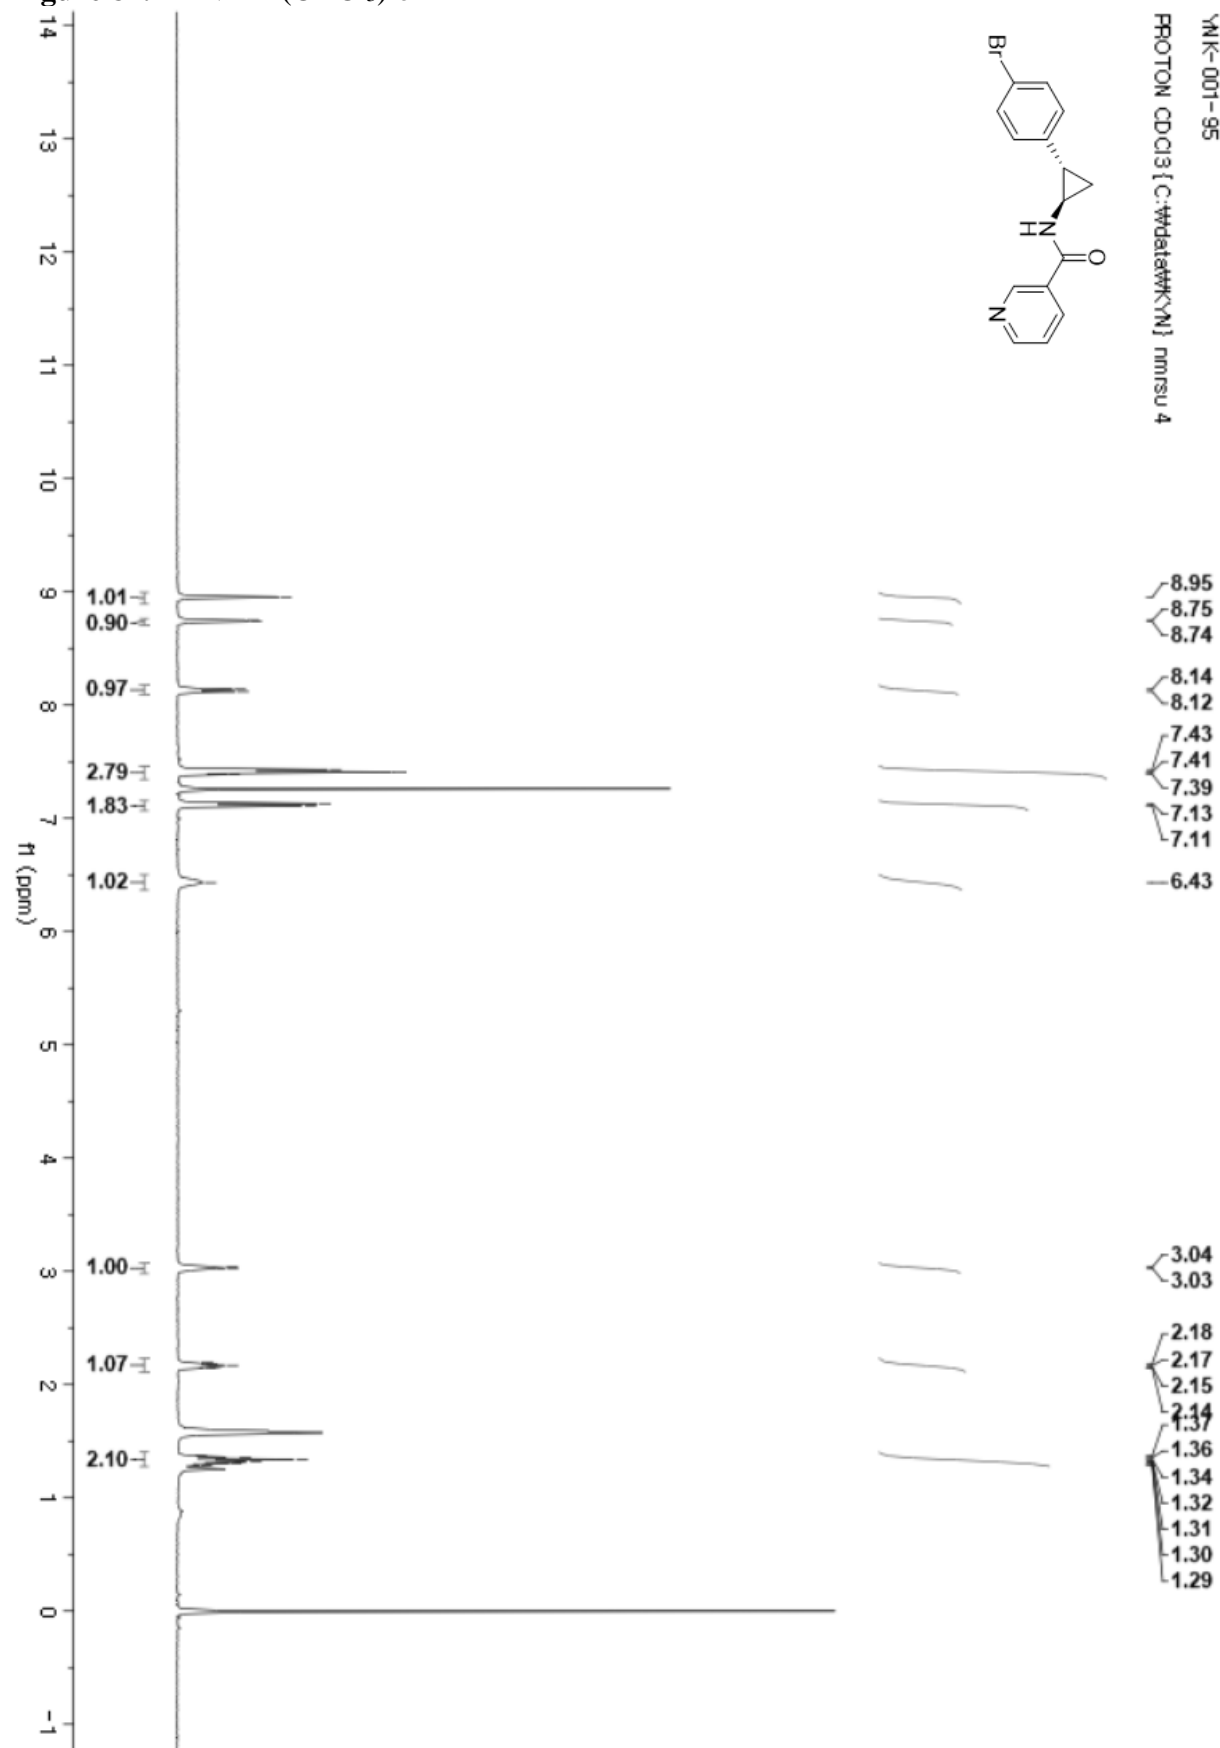

**Figure 85.**  $^{13}\text{C}$  NMR ( $\text{CDCl}_3$ ) of **11k**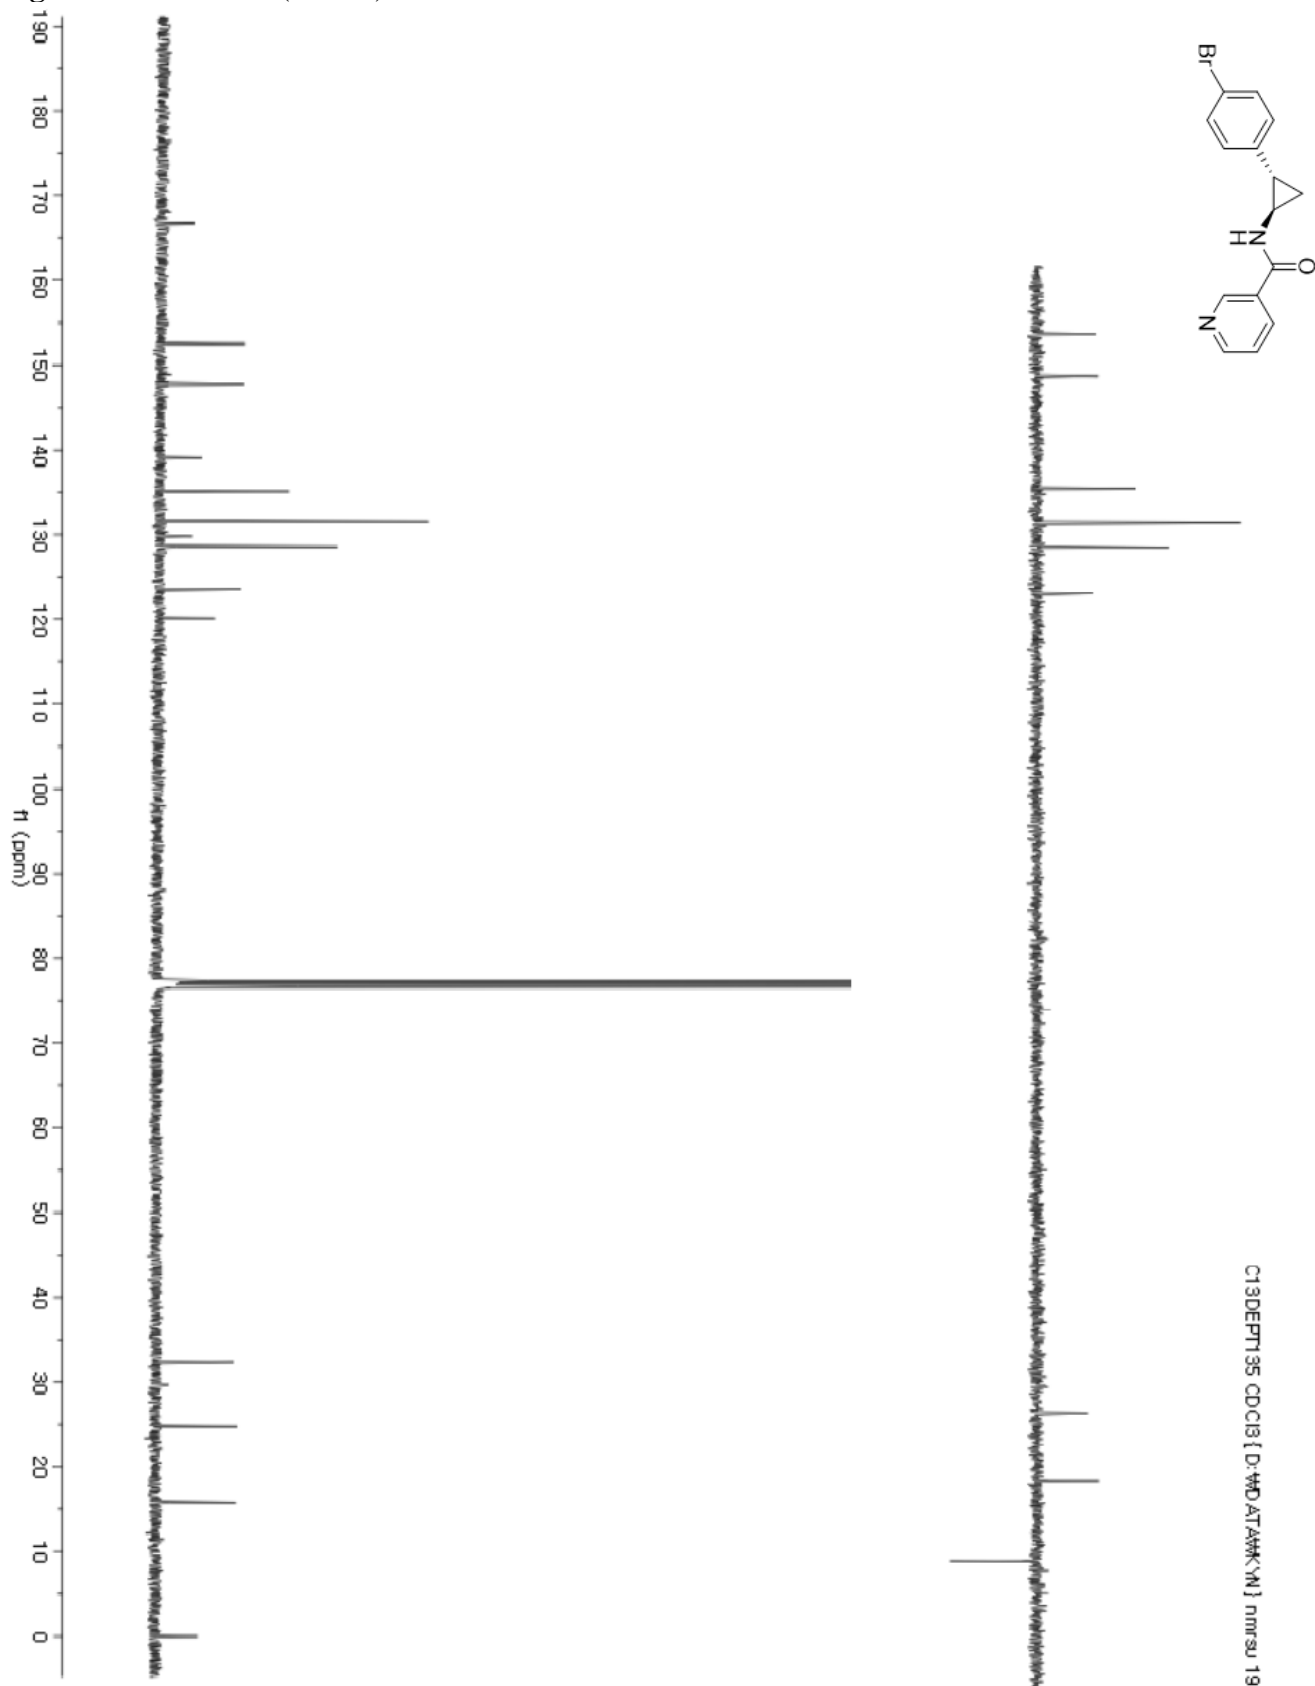

Figure 86.  $^1\text{H}$  NMR ( $\text{CDCl}_3$ ) of 111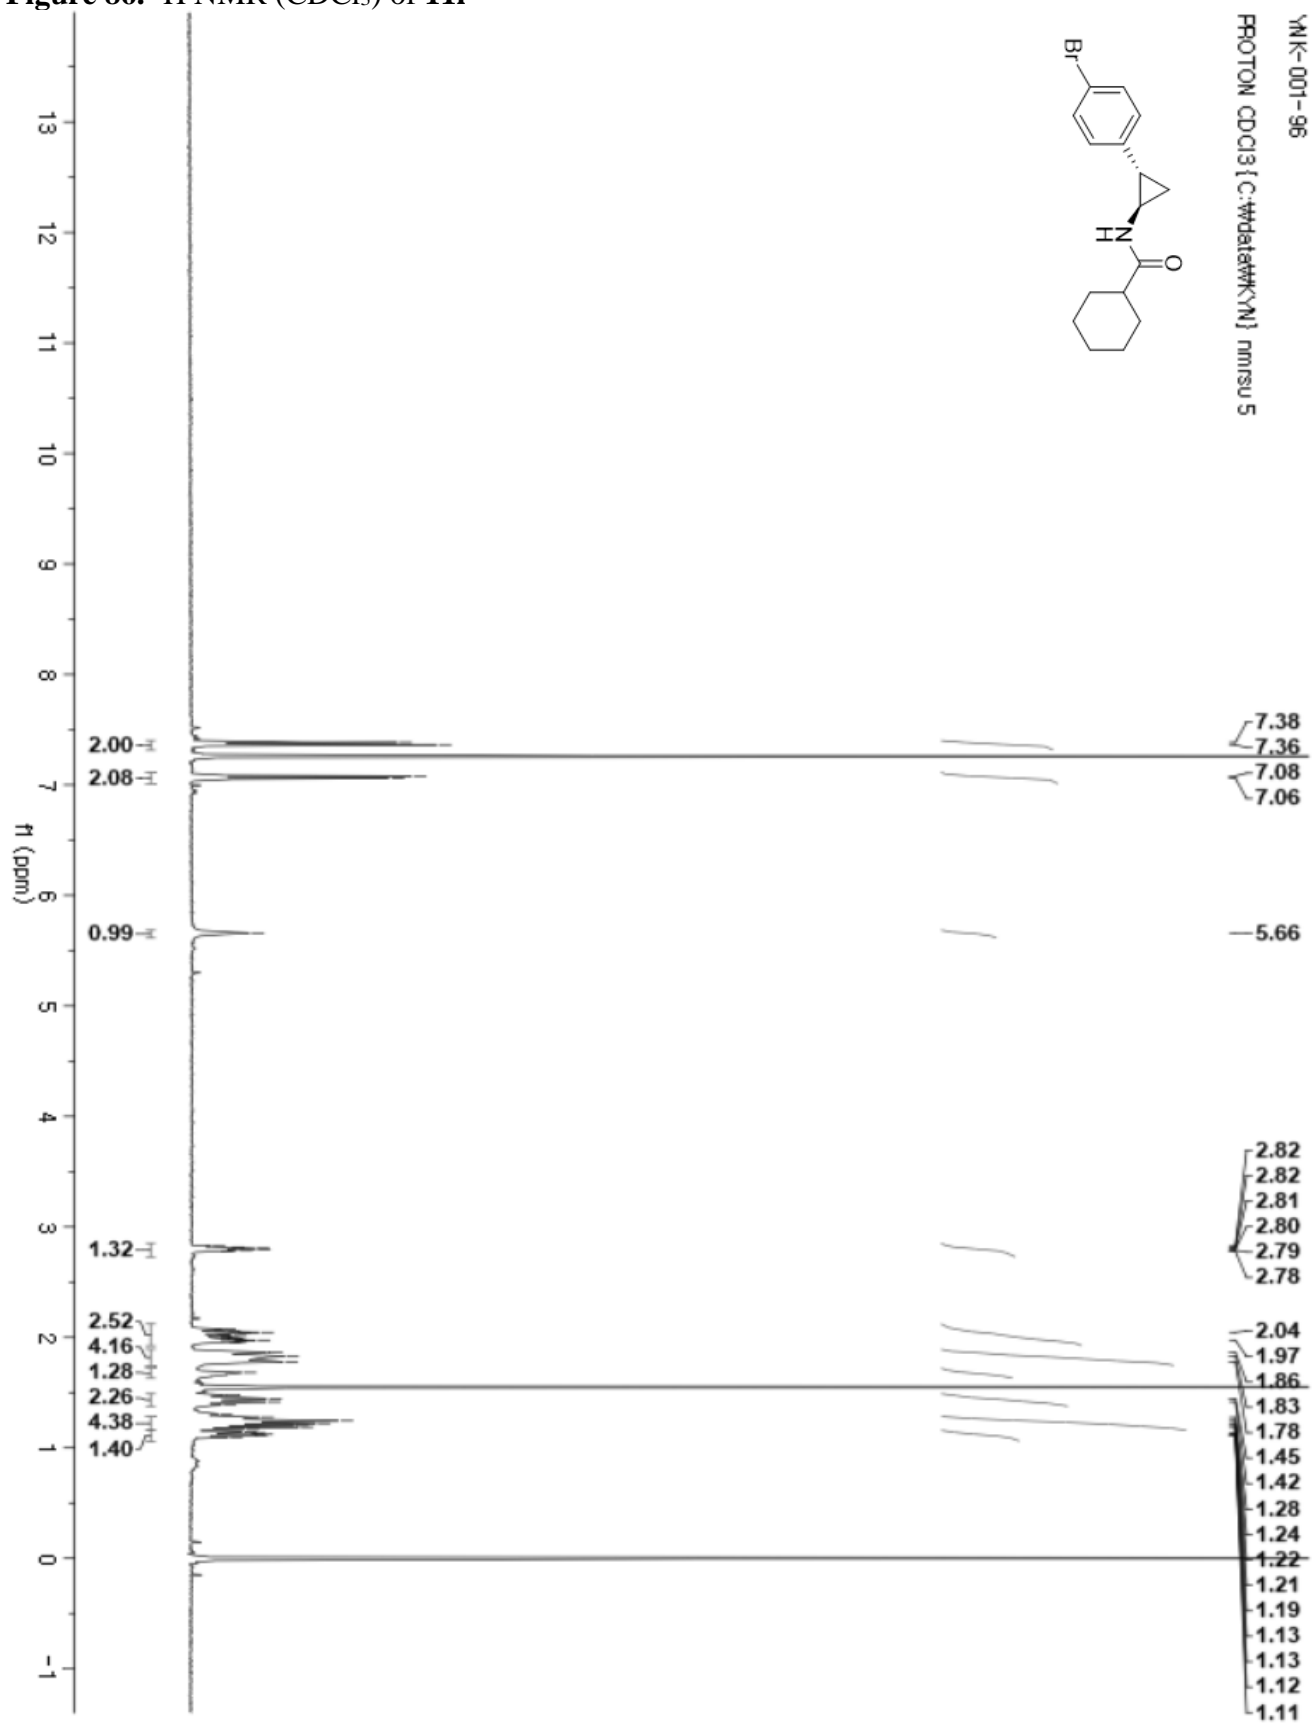

**Figure 87.**  $^{13}\text{C}$  NMR ( $\text{CDCl}_3$ ) of **111**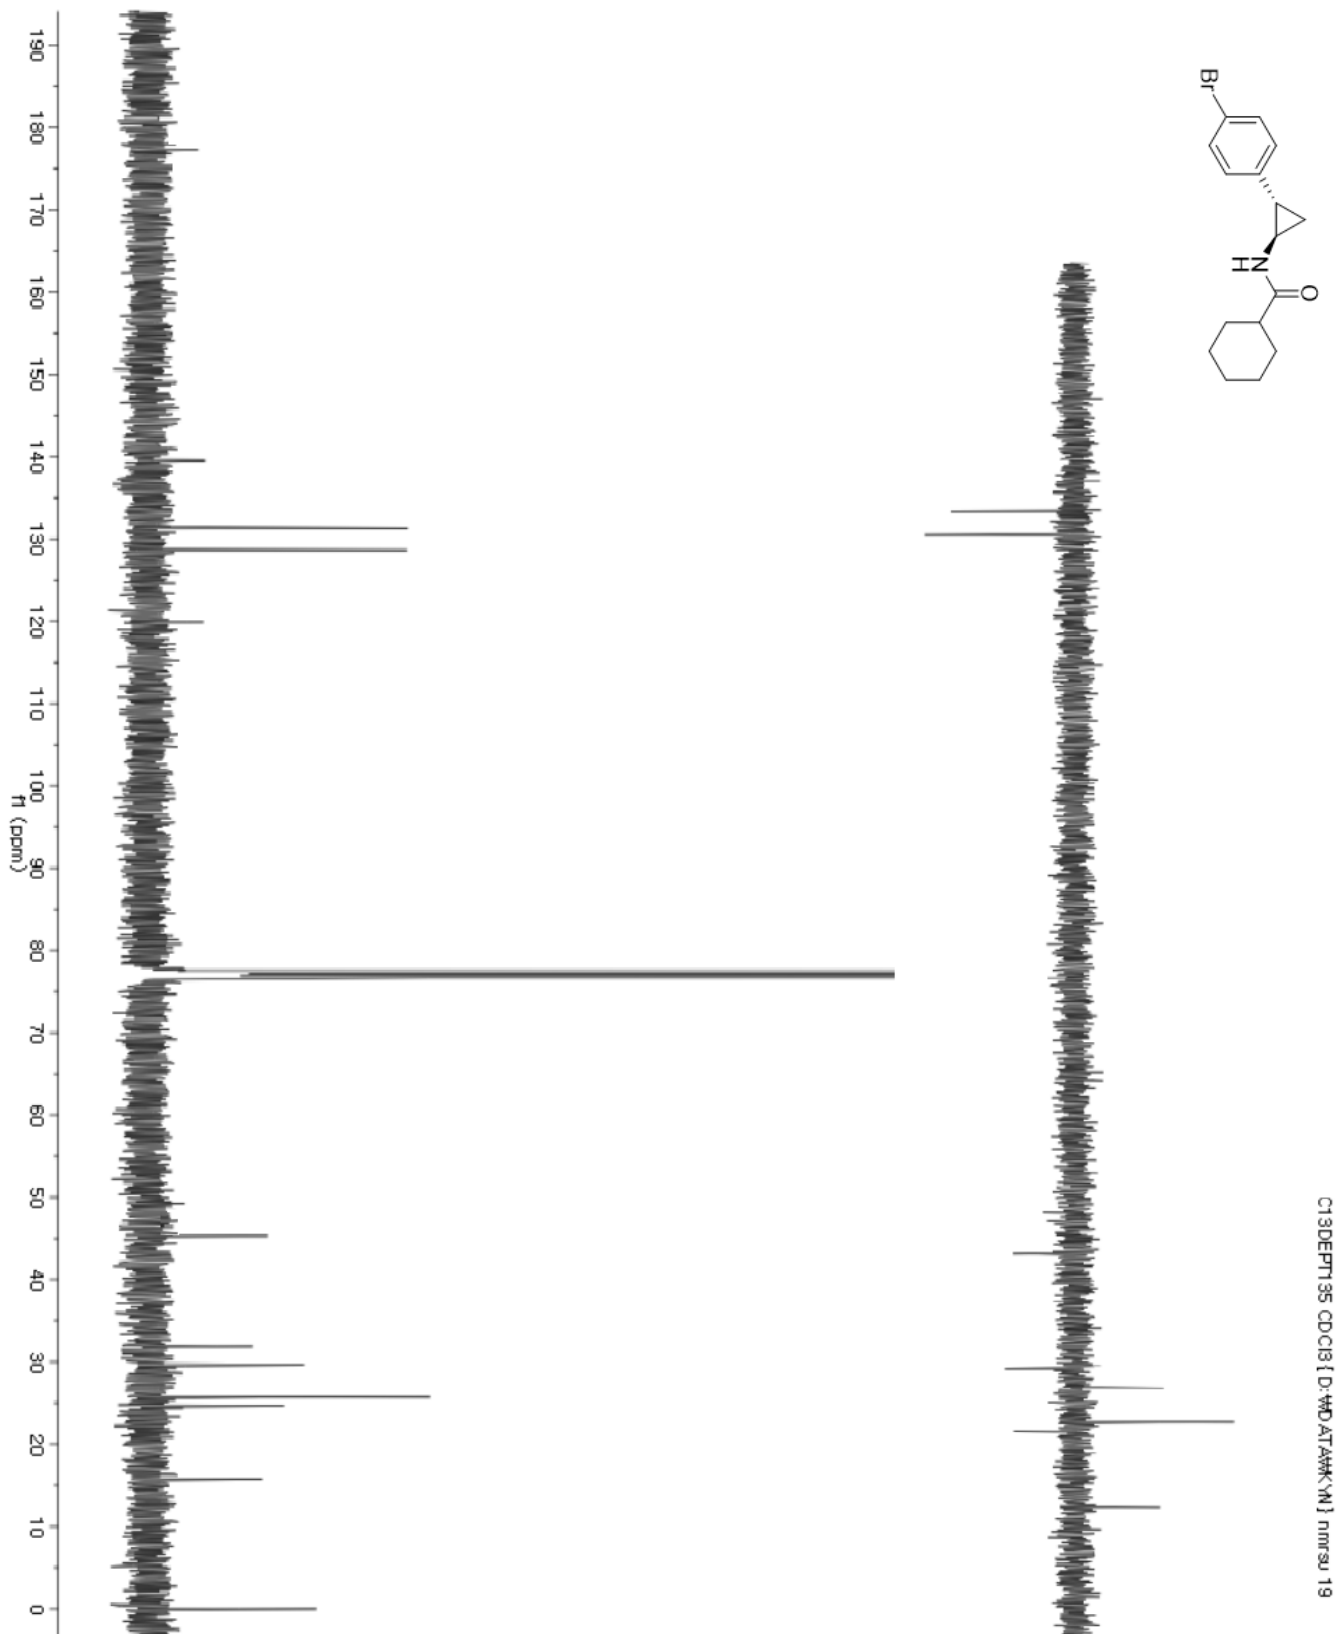

Figure 88.  $^1\text{H}$  NMR ( $\text{CDCl}_3$ ) of **11m**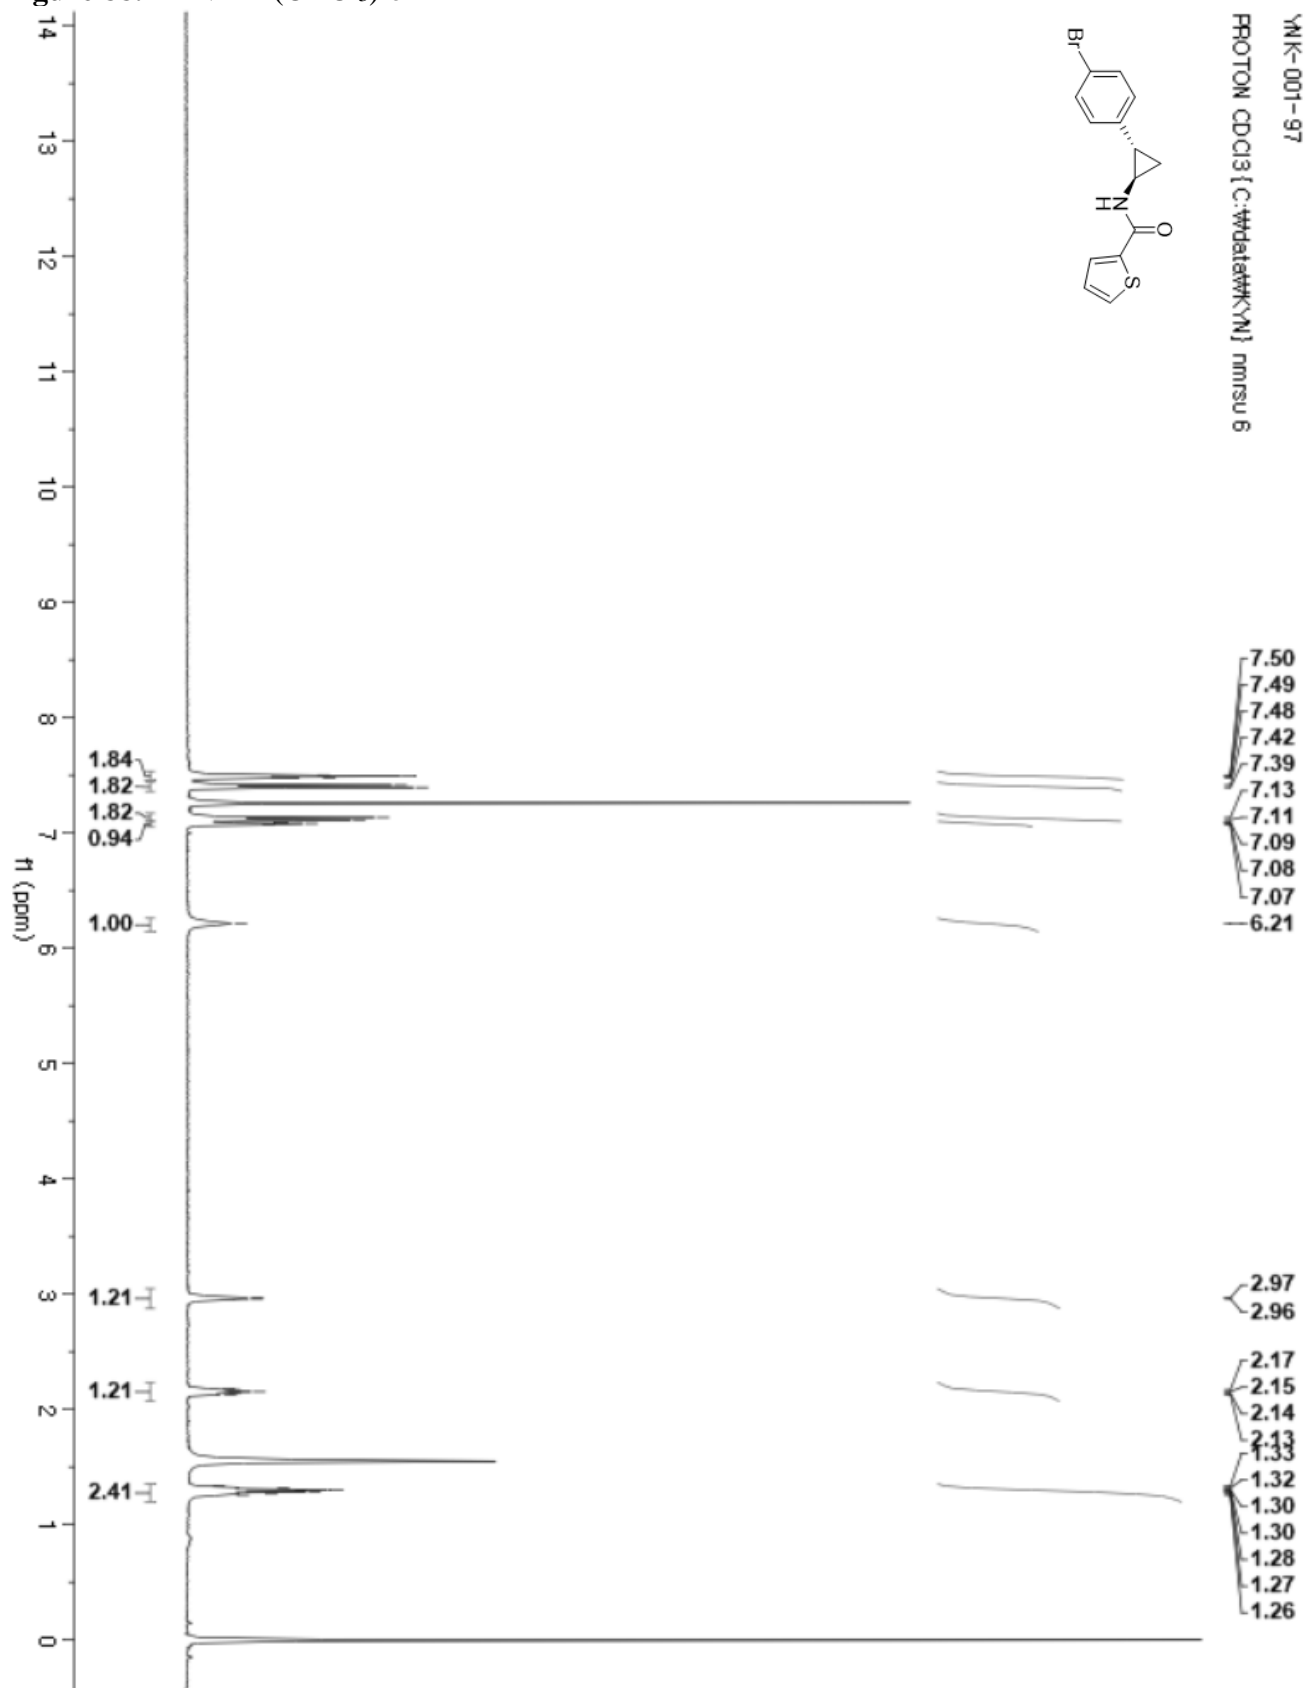



**Figure 89.**  $^{13}\text{C}$  NMR ( $\text{CDCl}_3$ ) of **11m**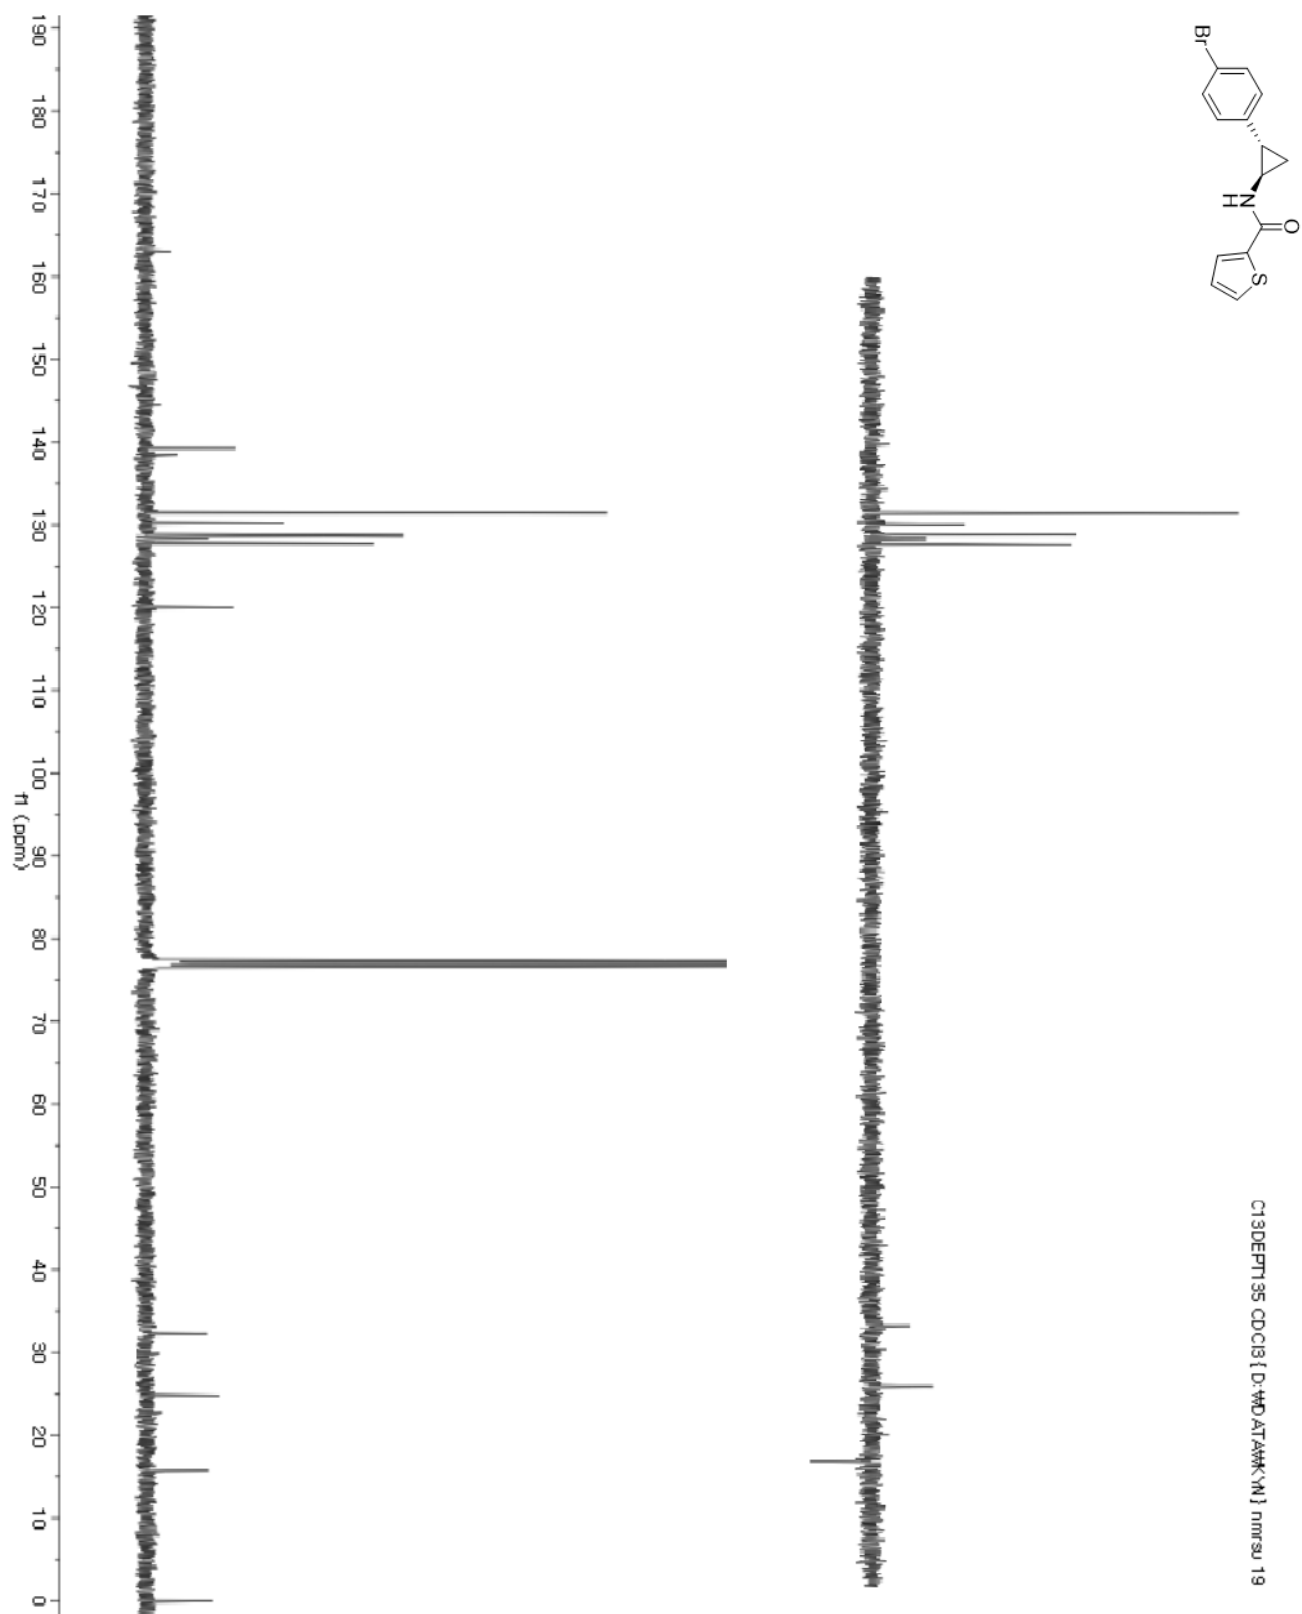

Figure 90.  $^1\text{H}$  NMR ( $\text{CDCl}_3$ ) of 11n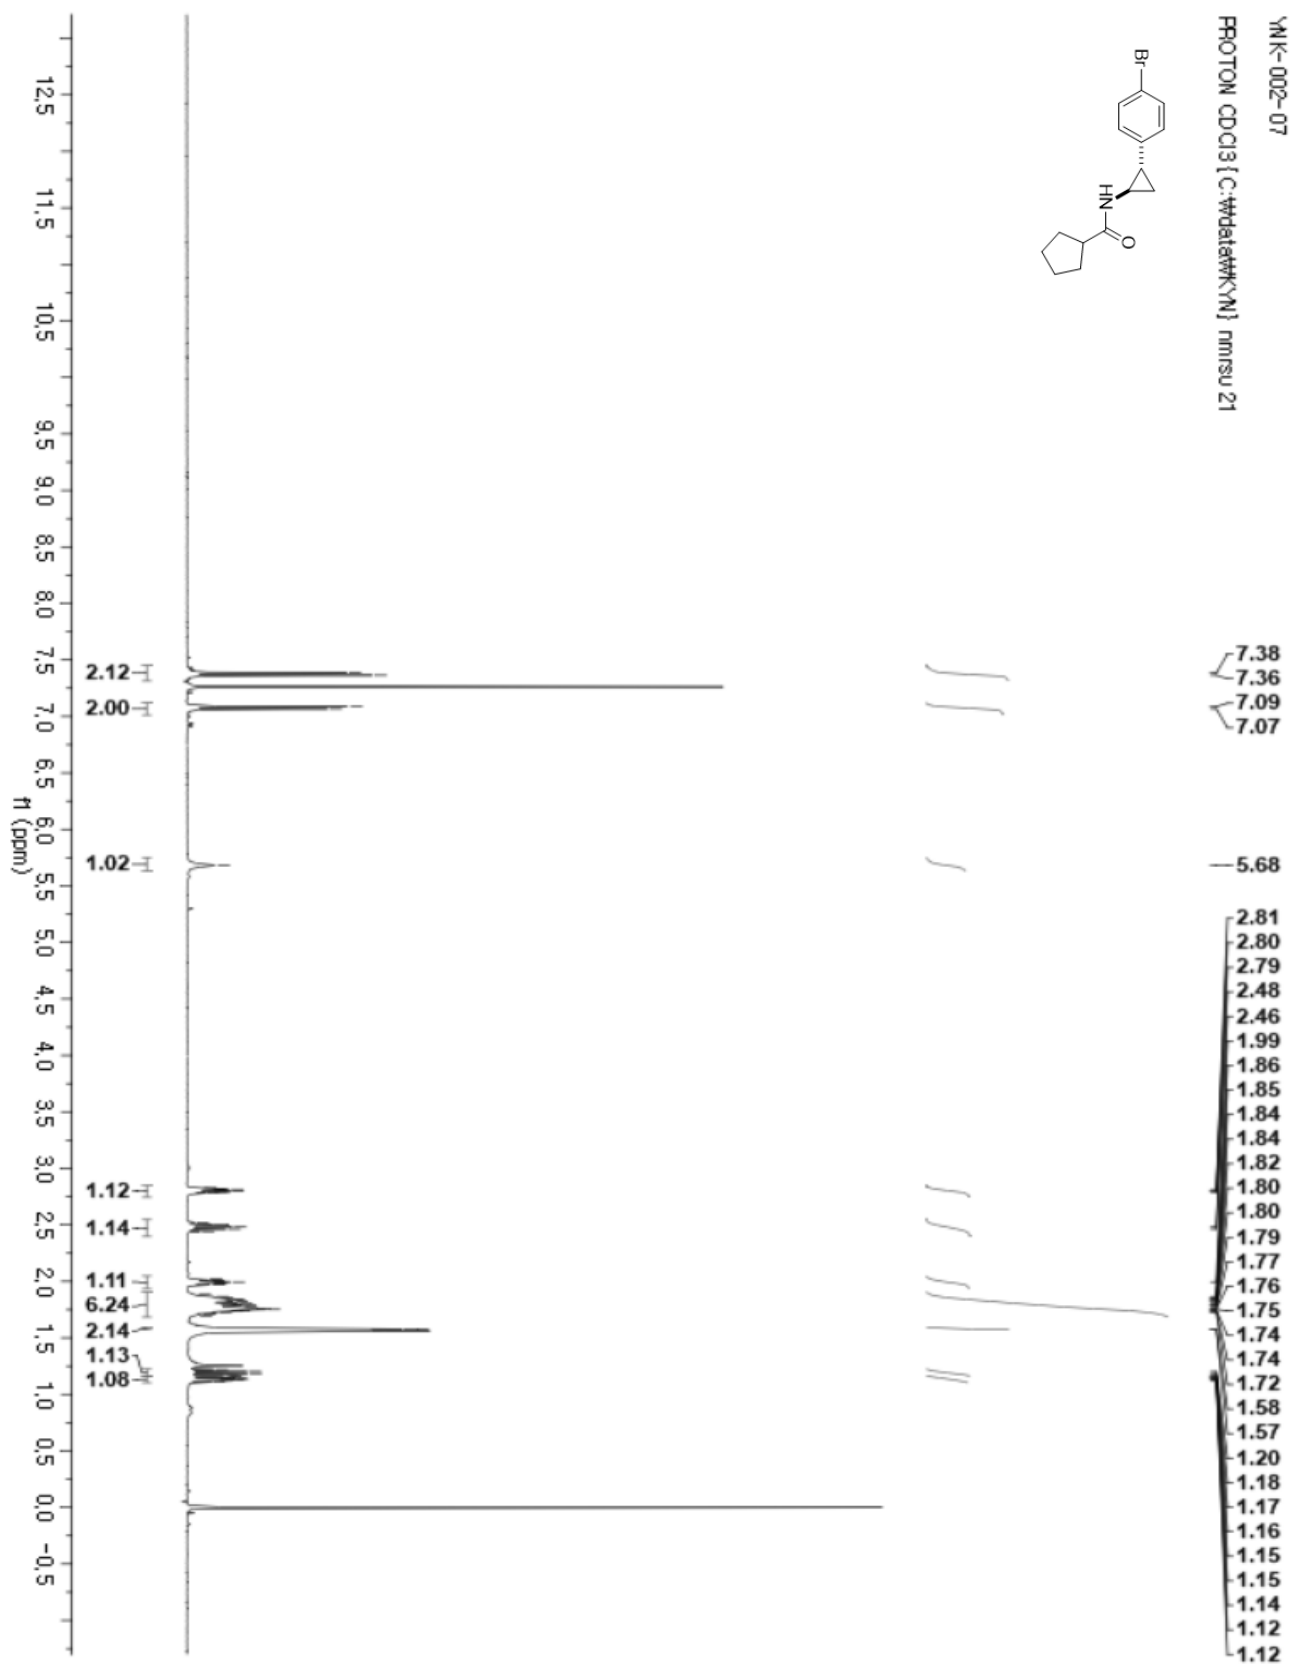

**Figure 91.**  $^{13}\text{C}$  NMR ( $\text{CDCl}_3$ ) of **11n**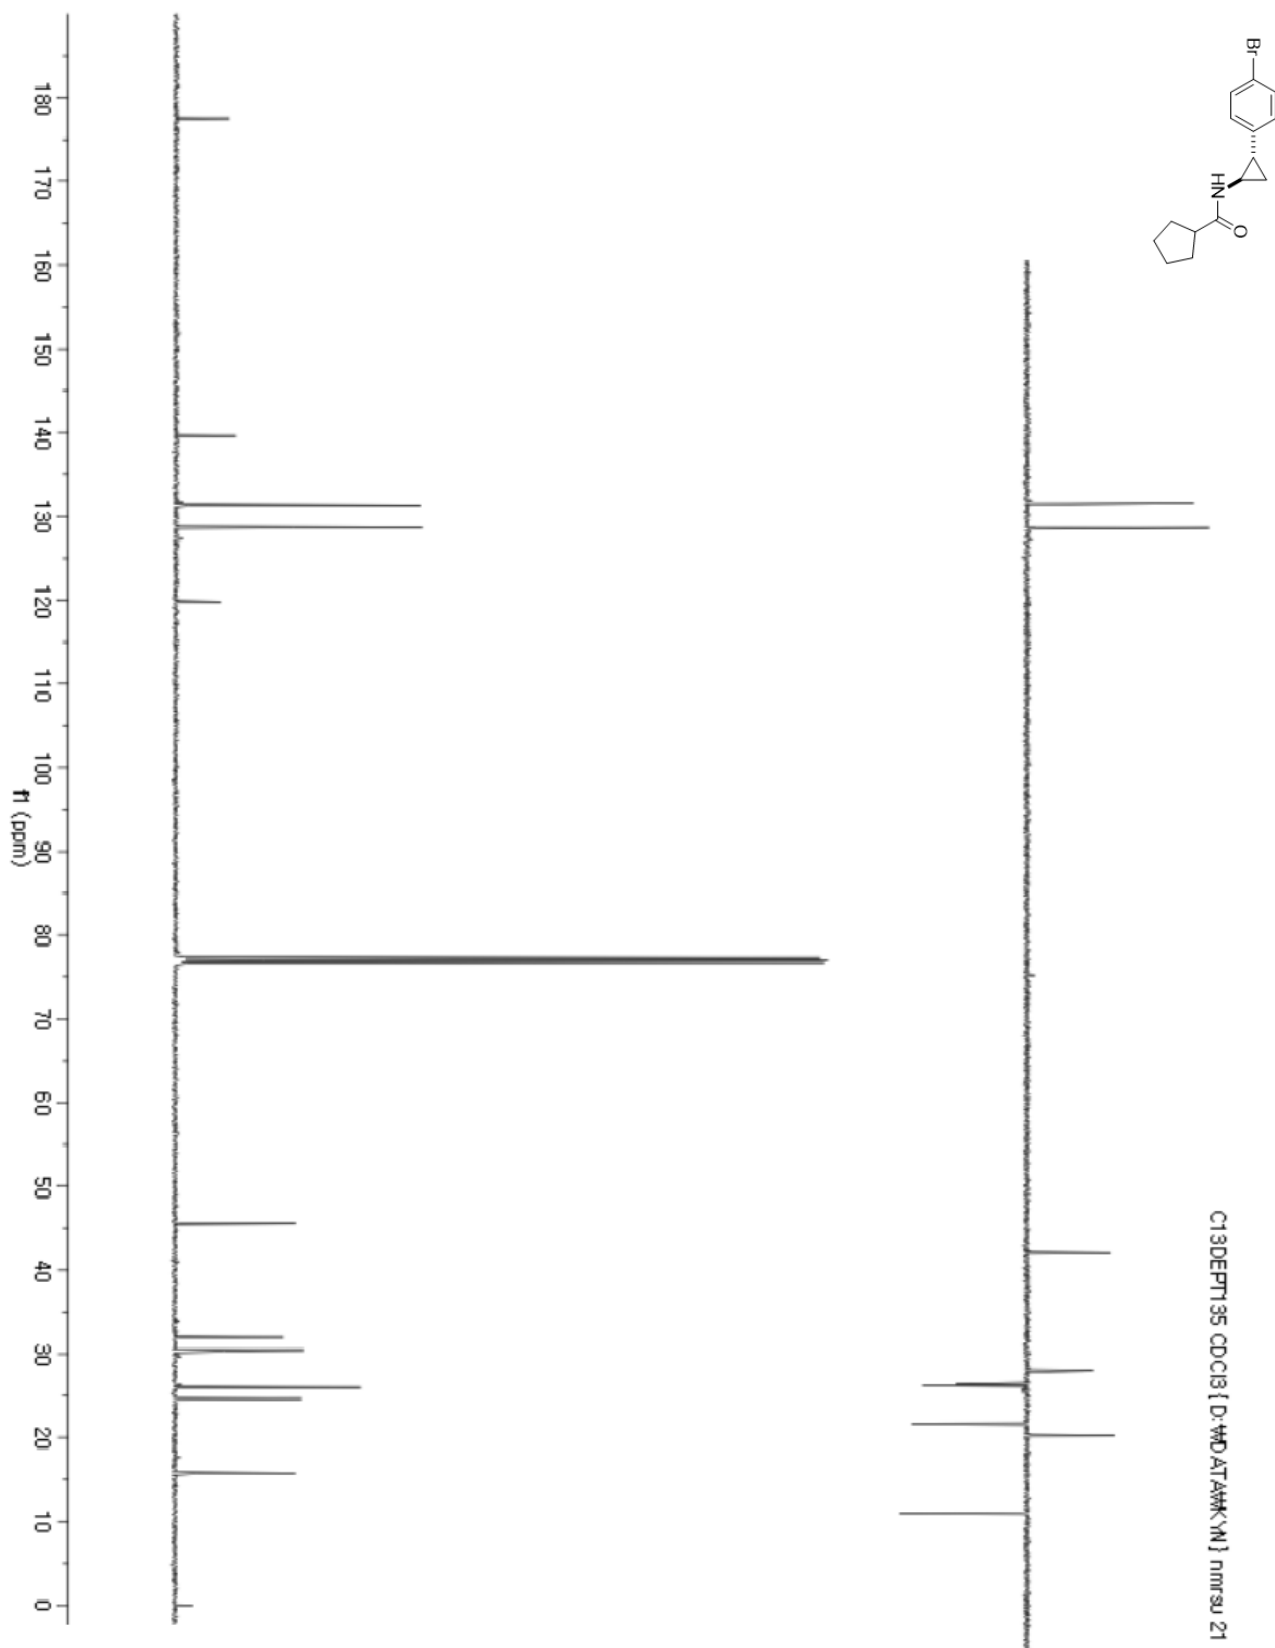

Figure 92.  $^1\text{H}$  NMR ( $\text{CDCl}_3$ ) of **11o**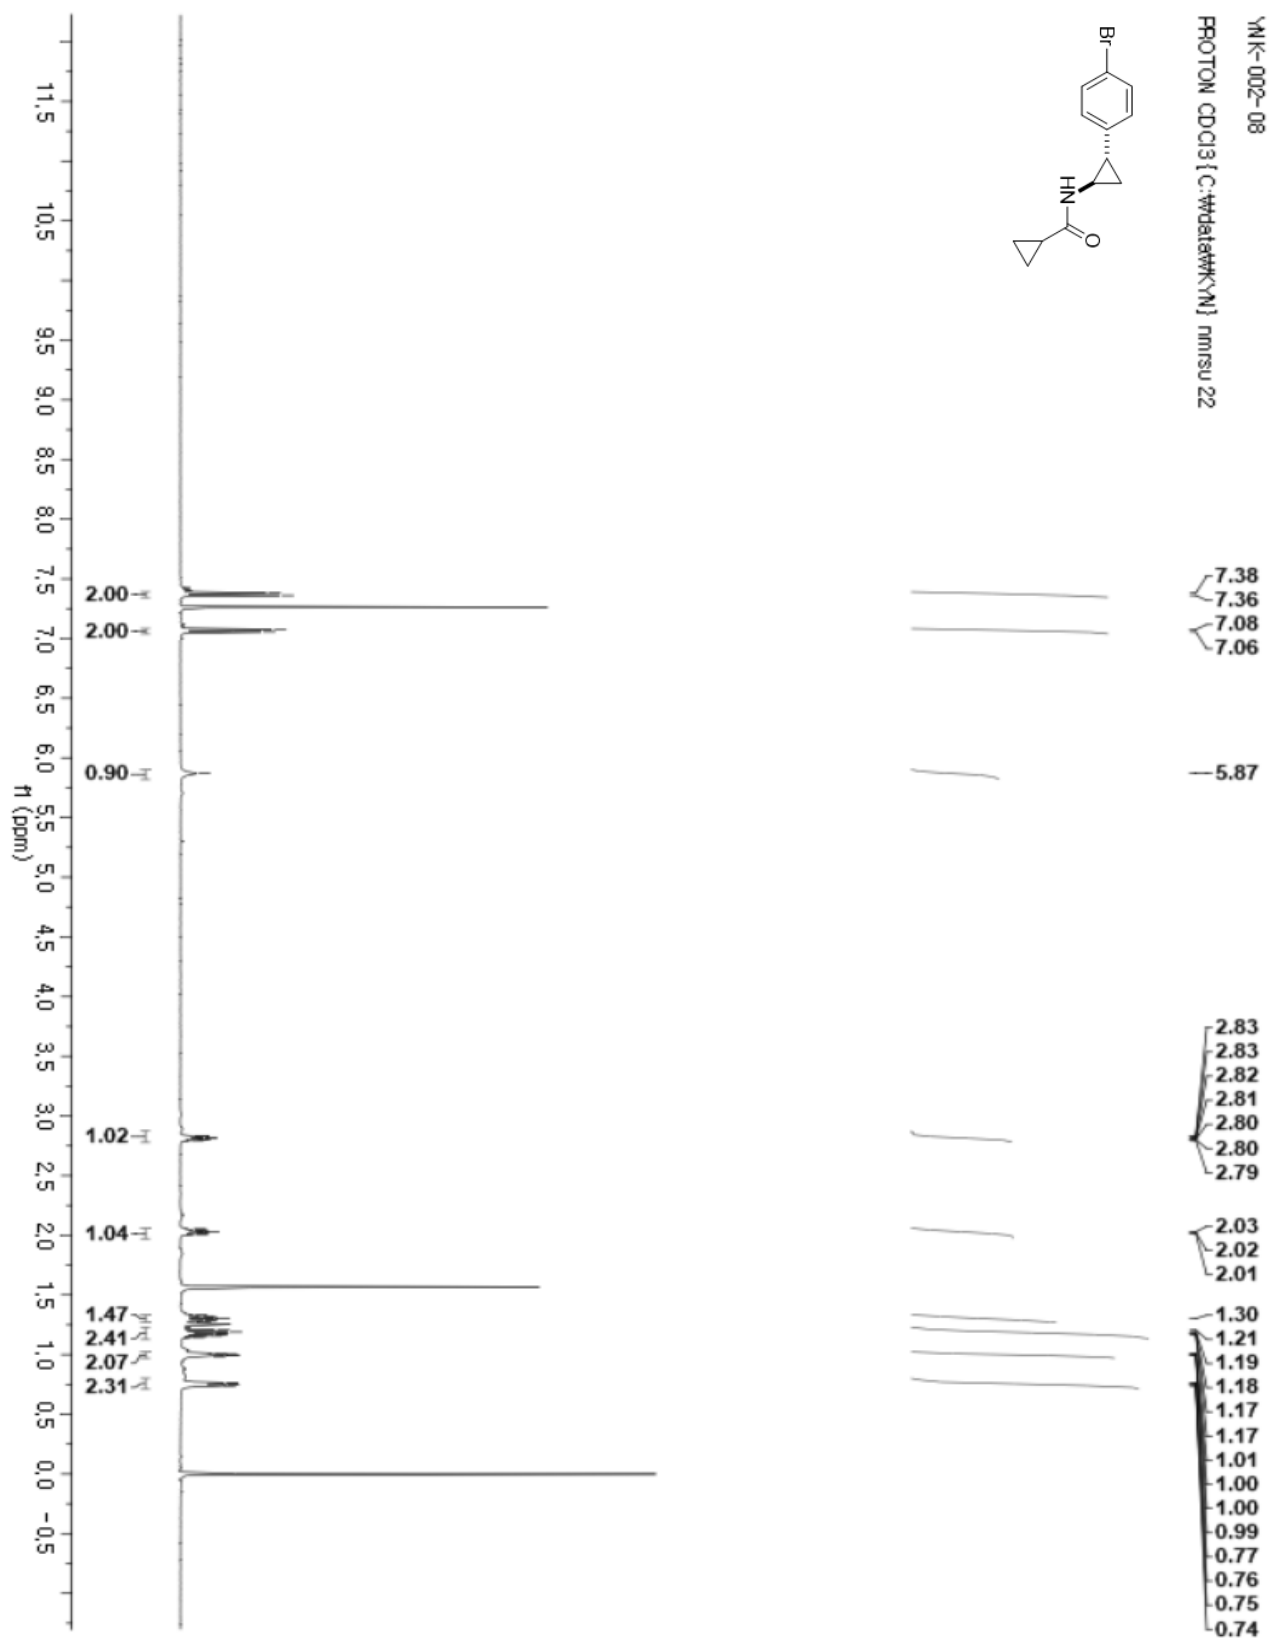

**Figure 93.**  $^{13}\text{C}$  NMR ( $\text{CDCl}_3$ ) of **11o**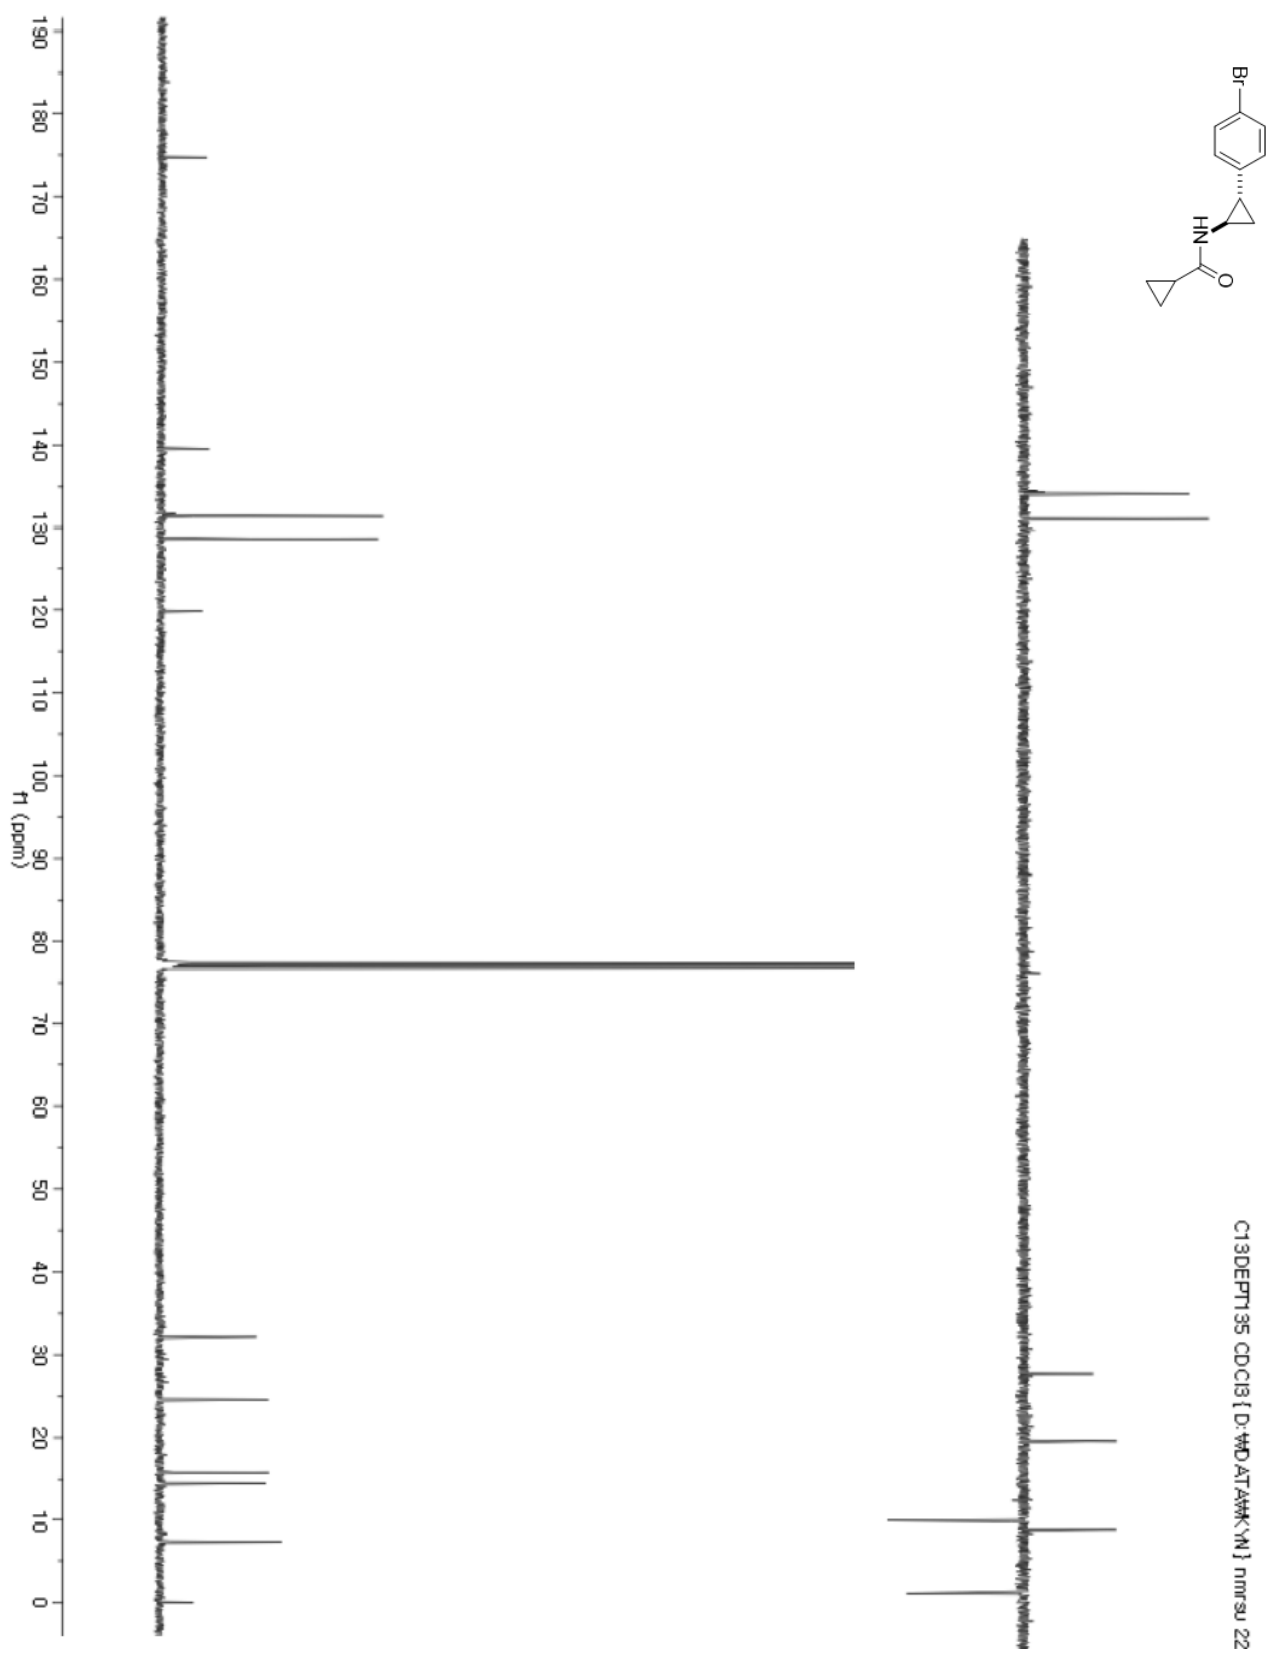

Figure 94.  $^1\text{H}$  NMR ( $\text{CDCl}_3$ ) of **11p**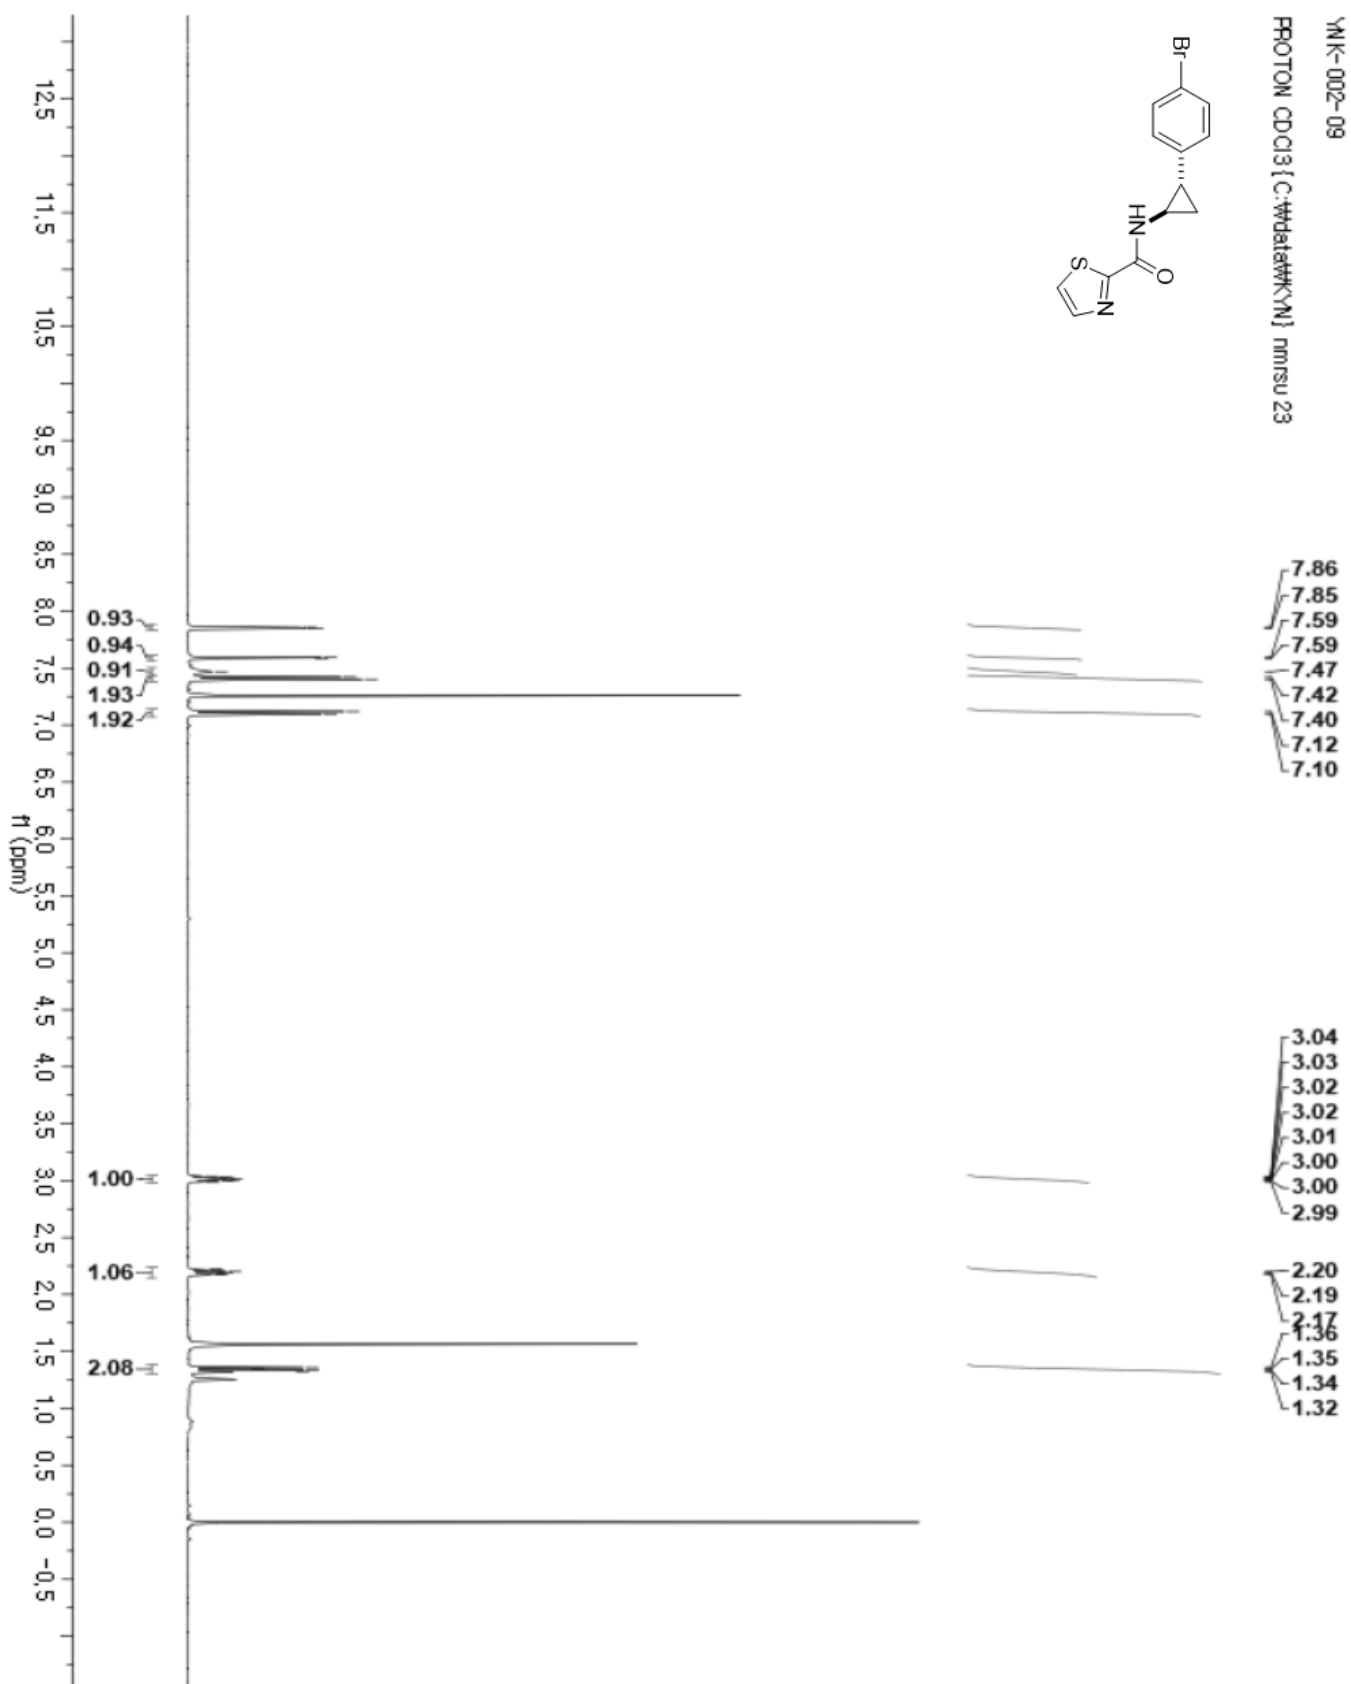

**Figure 95.**  $^{13}\text{C}$  NMR ( $\text{CDCl}_3$ ) of **11p**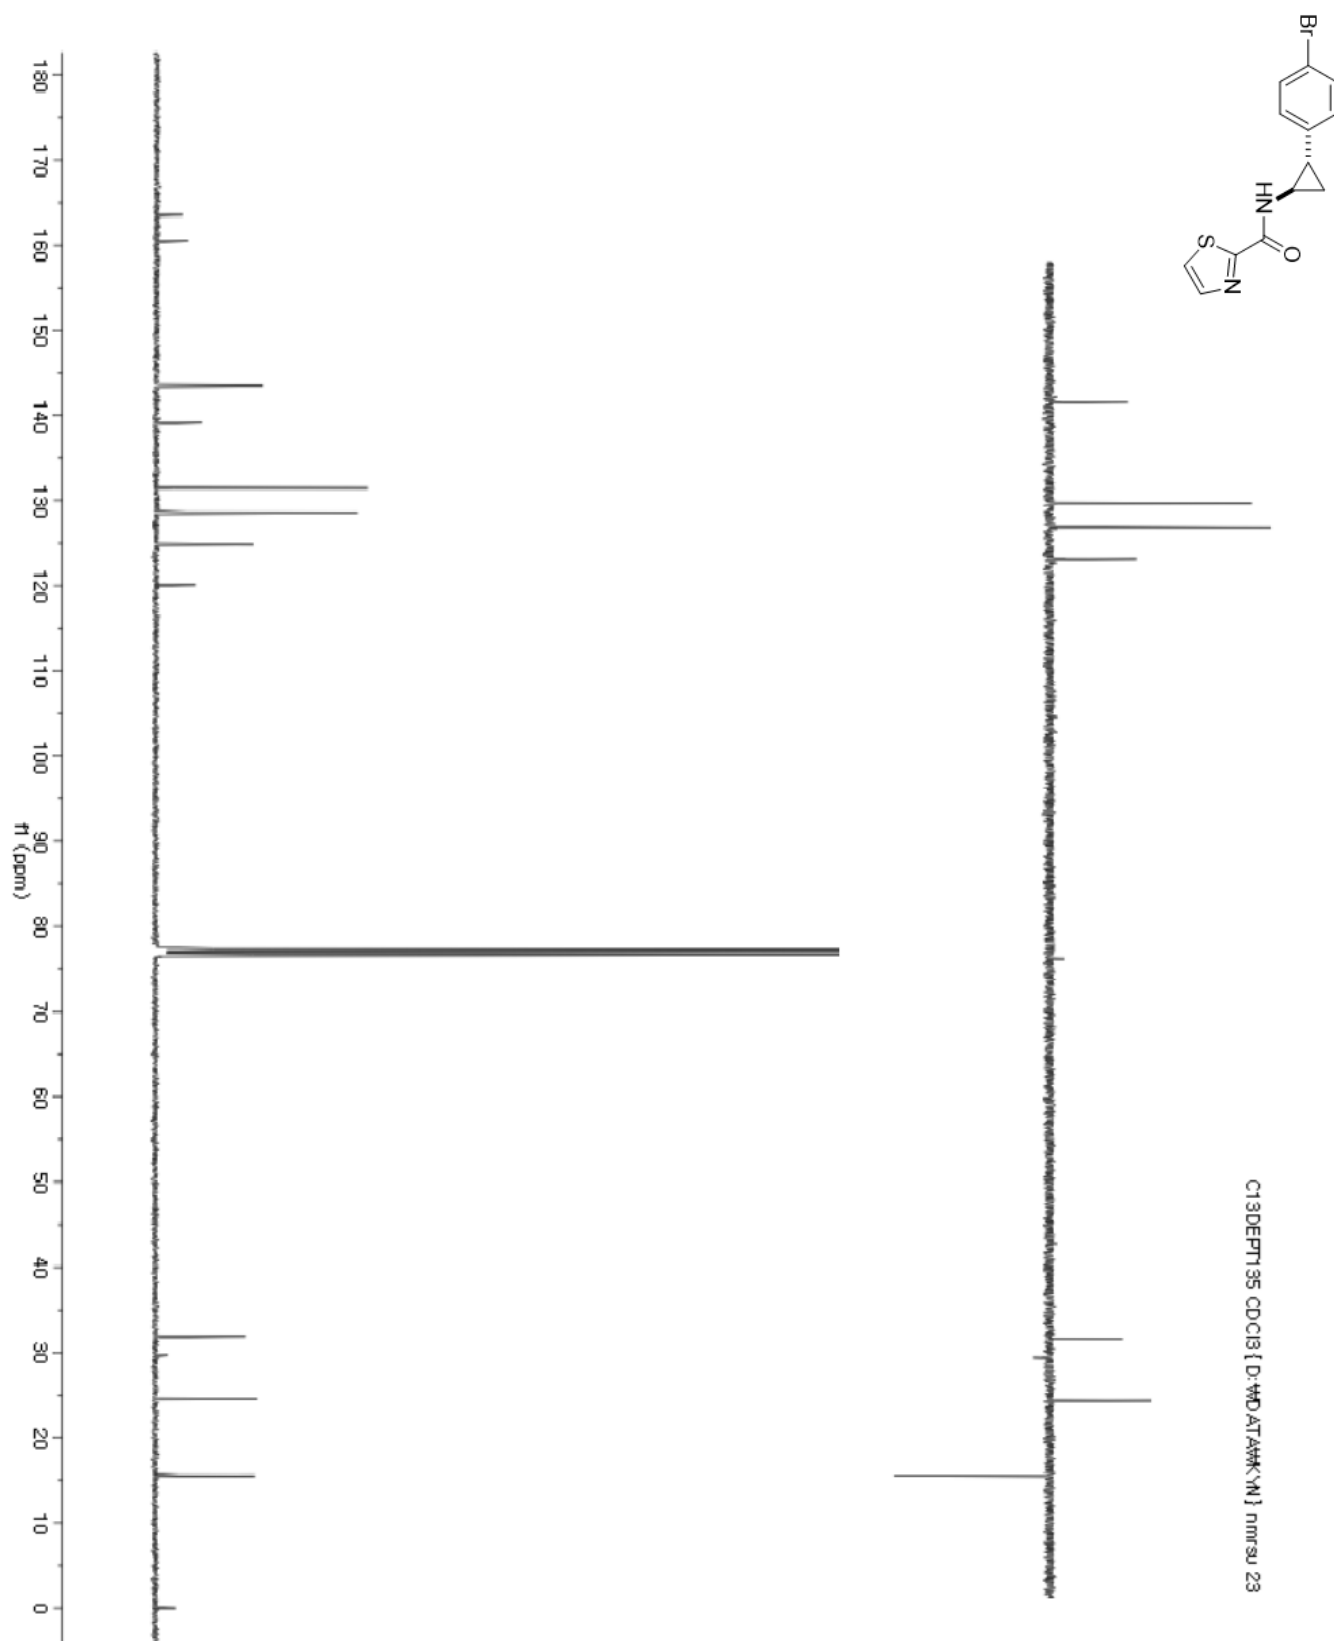

Figure 96.  $^1\text{H}$  NMR ( $\text{CDCl}_3$ ) of 12a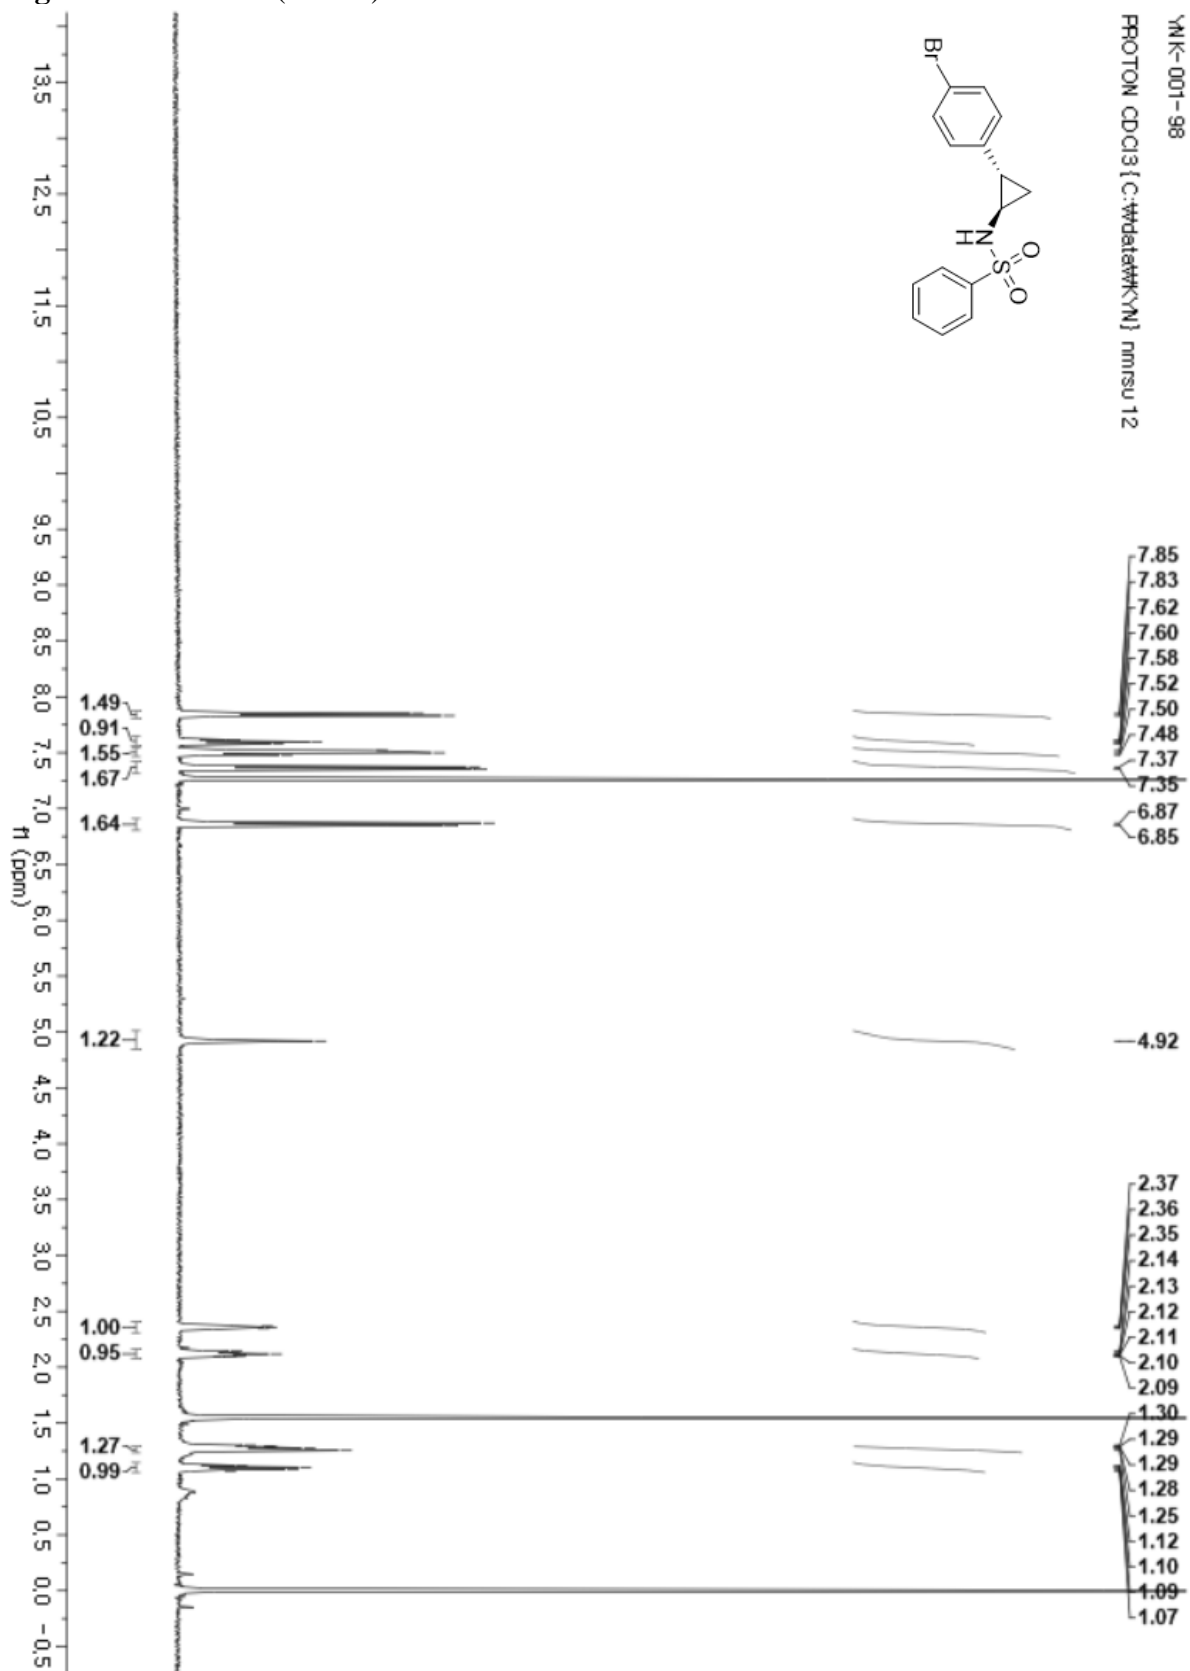



Figure 97.  $^{13}\text{C}$  NMR ( $\text{CDCl}_3$ ) of **12a**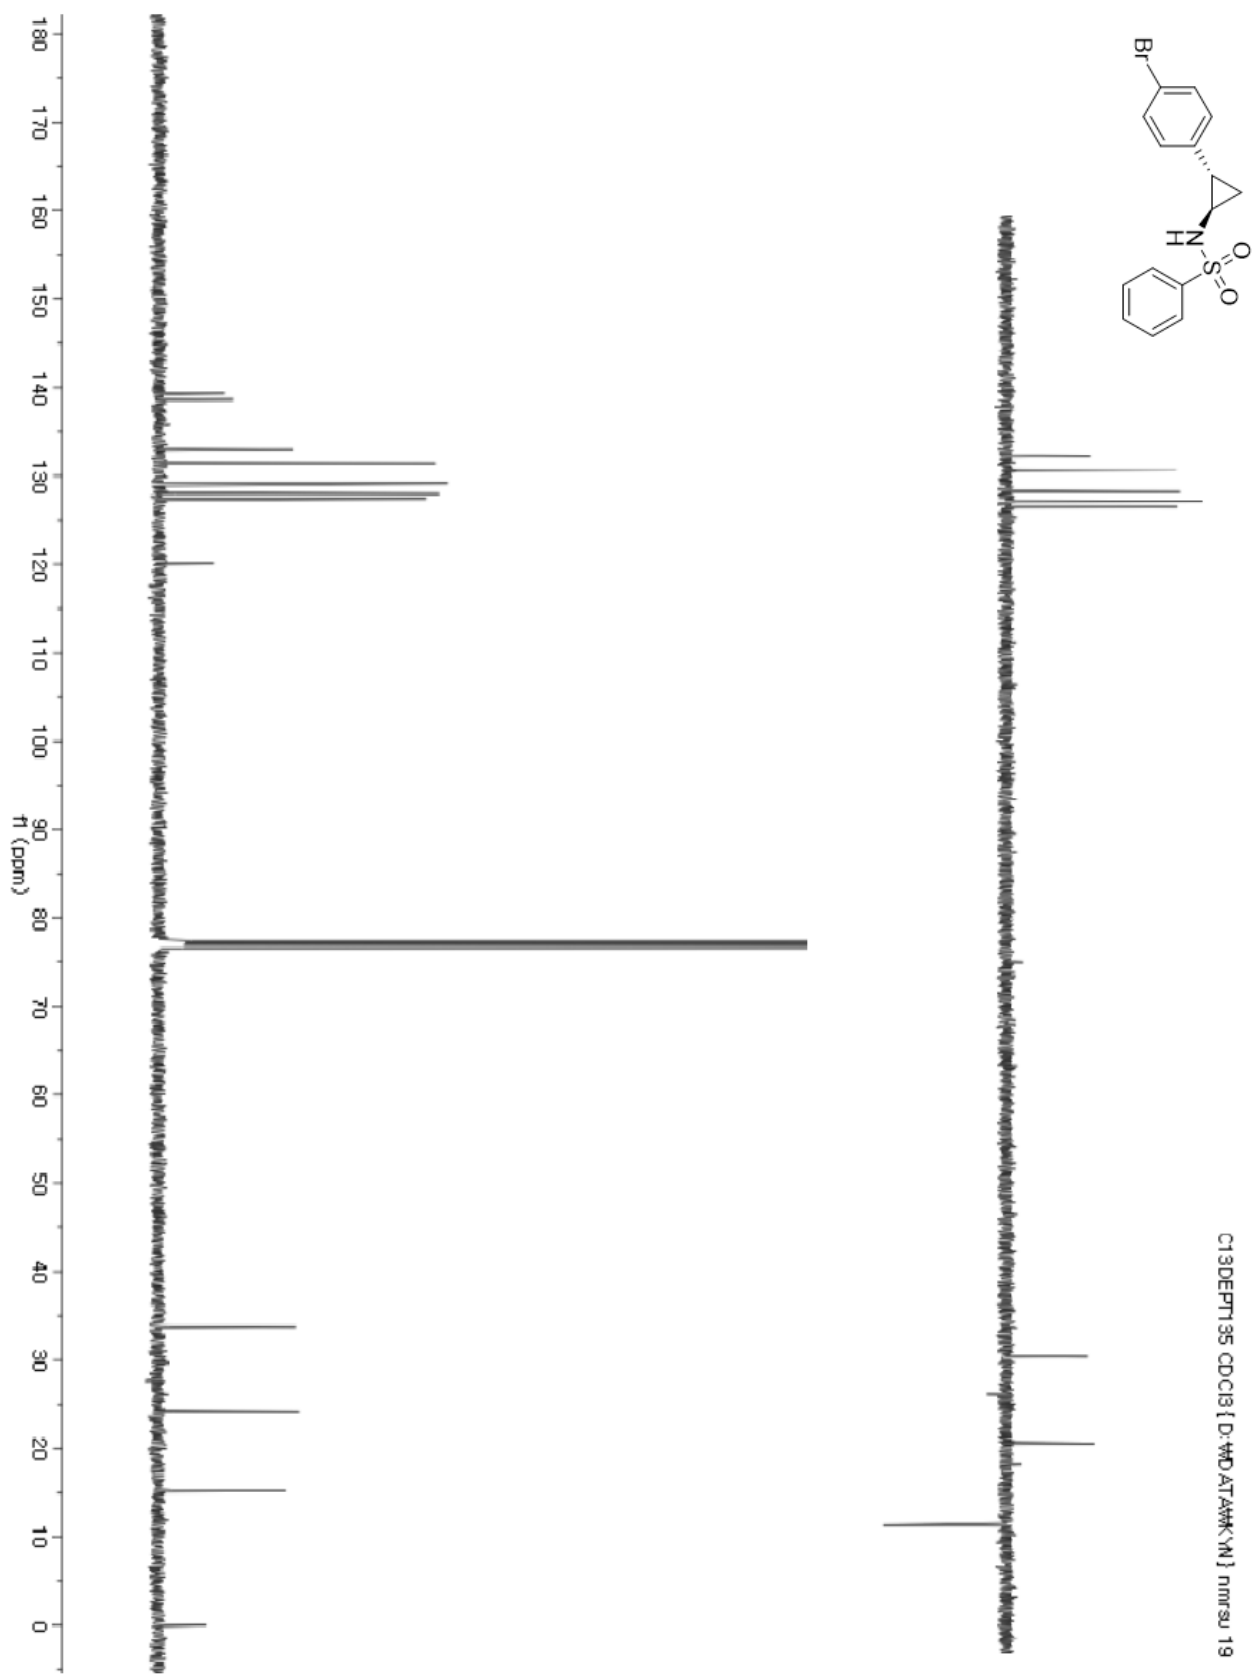

Figure 98.  $^1\text{H}$  NMR ( $\text{CDCl}_3$ ) of **12b**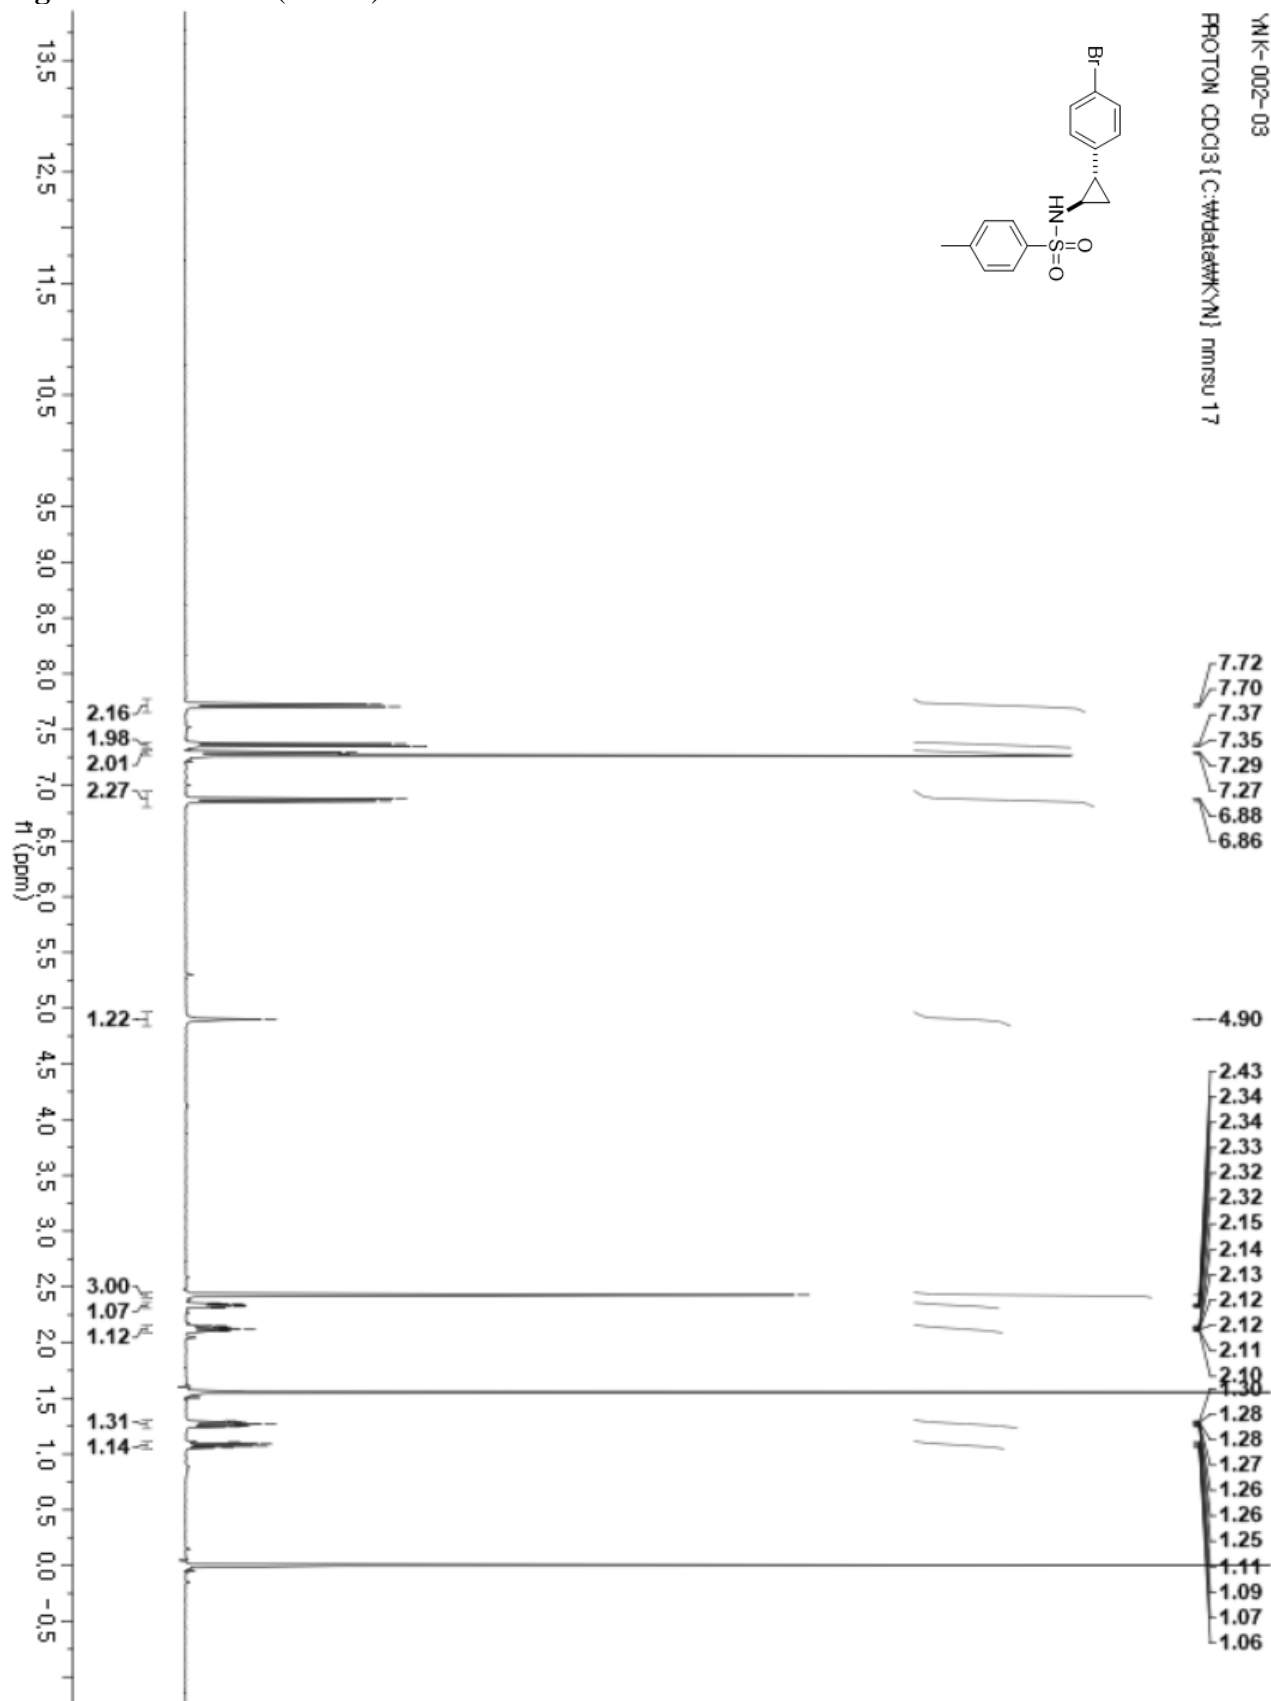

Figure 99.  $^{13}\text{C}$  NMR ( $\text{CDCl}_3$ ) of **12b**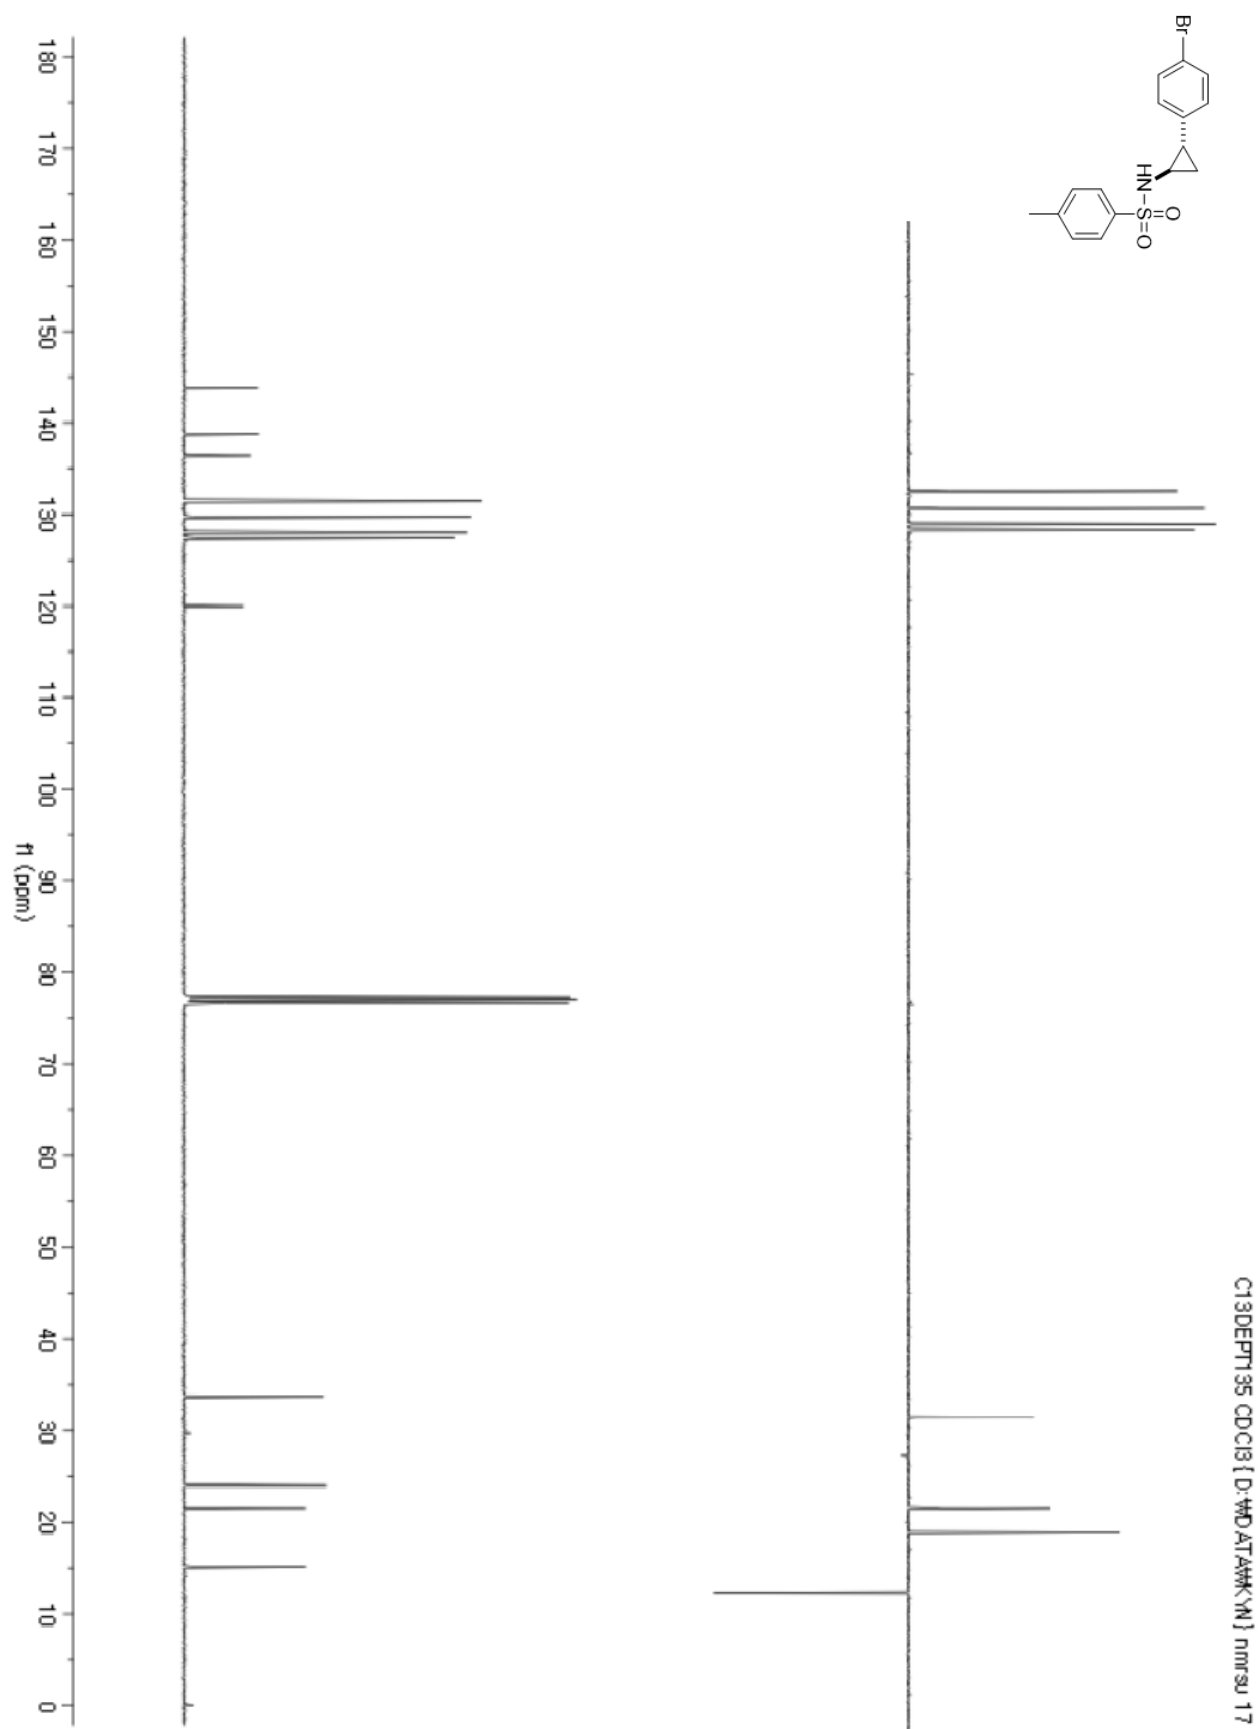

Figure 100.  $^1\text{H}$  NMR ( $\text{CDCl}_3$ ) of **12c**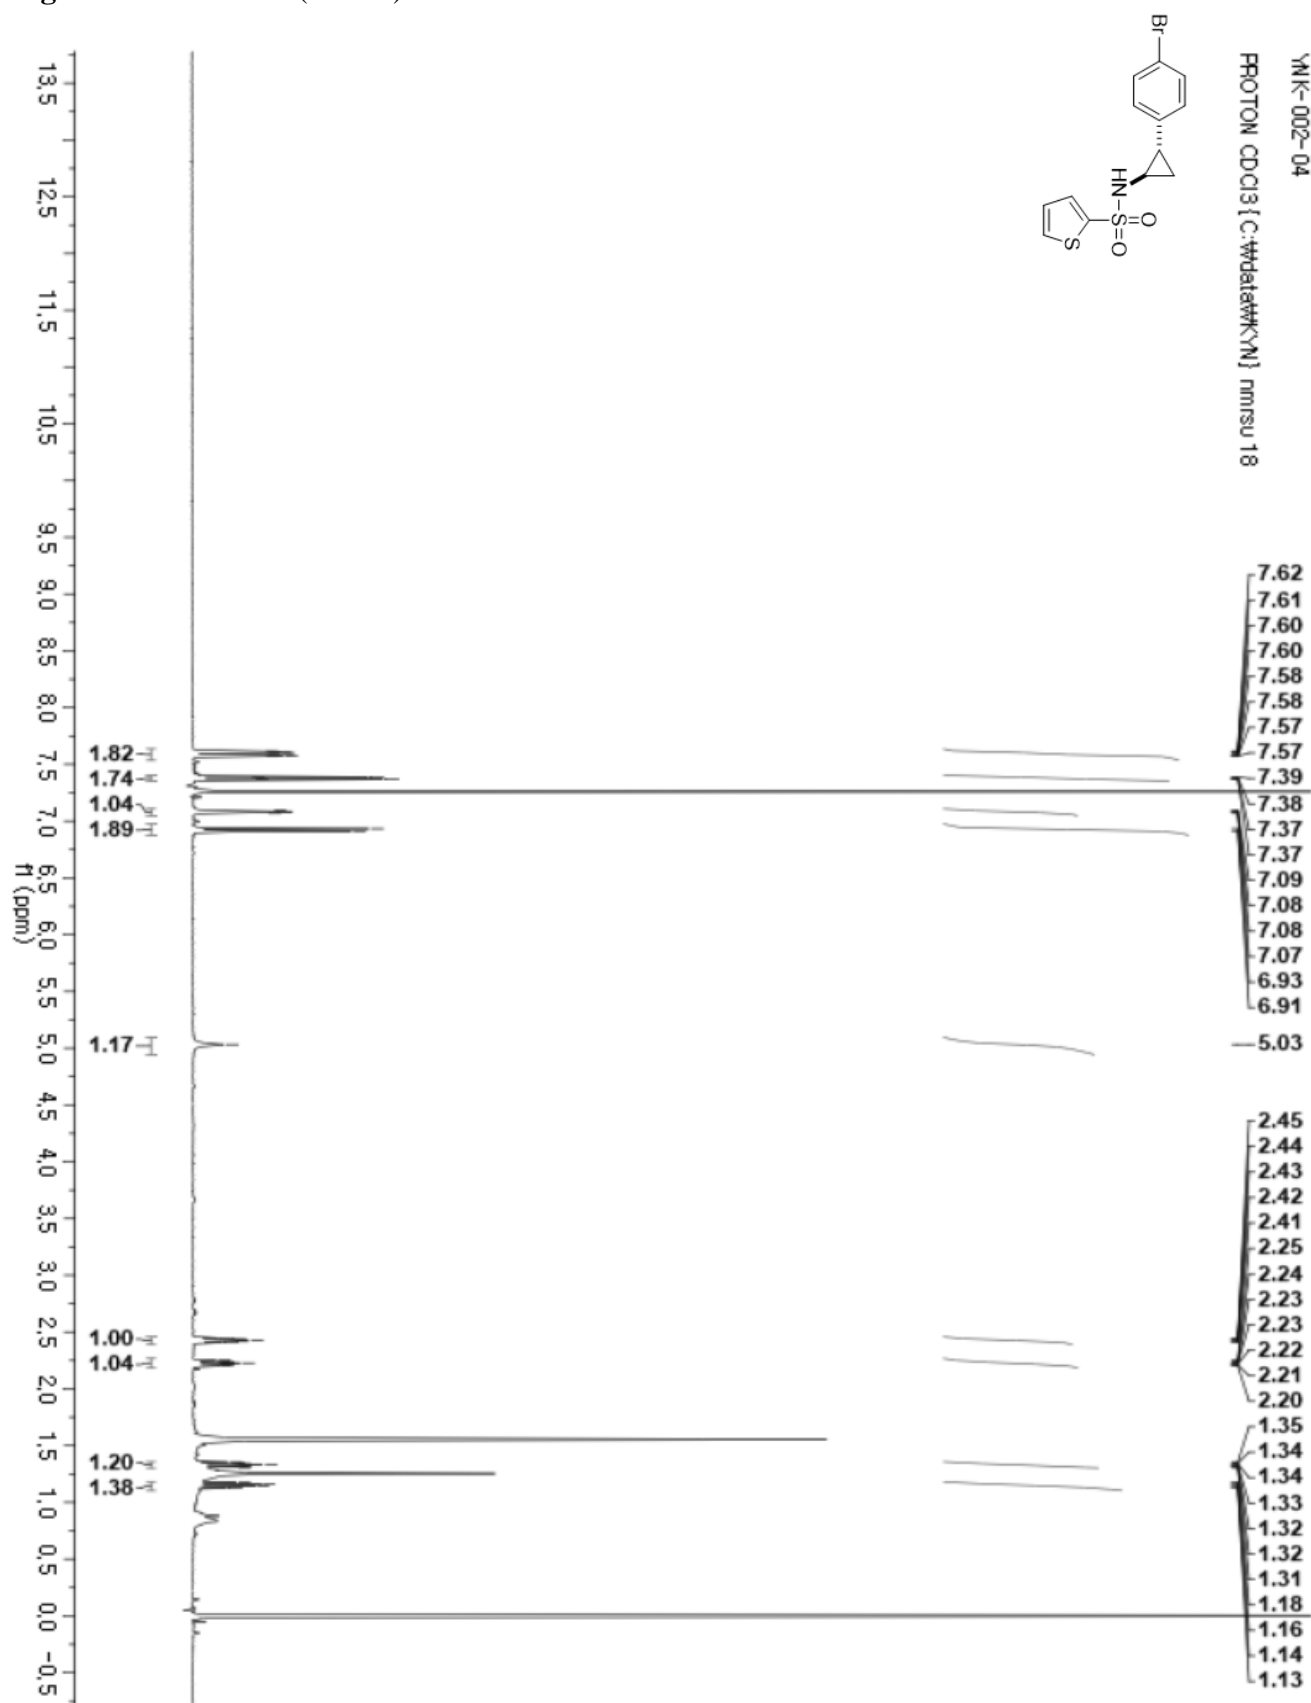

**Figure 101.**  $^{13}\text{C}$  NMR ( $\text{CDCl}_3$ ) of **12c**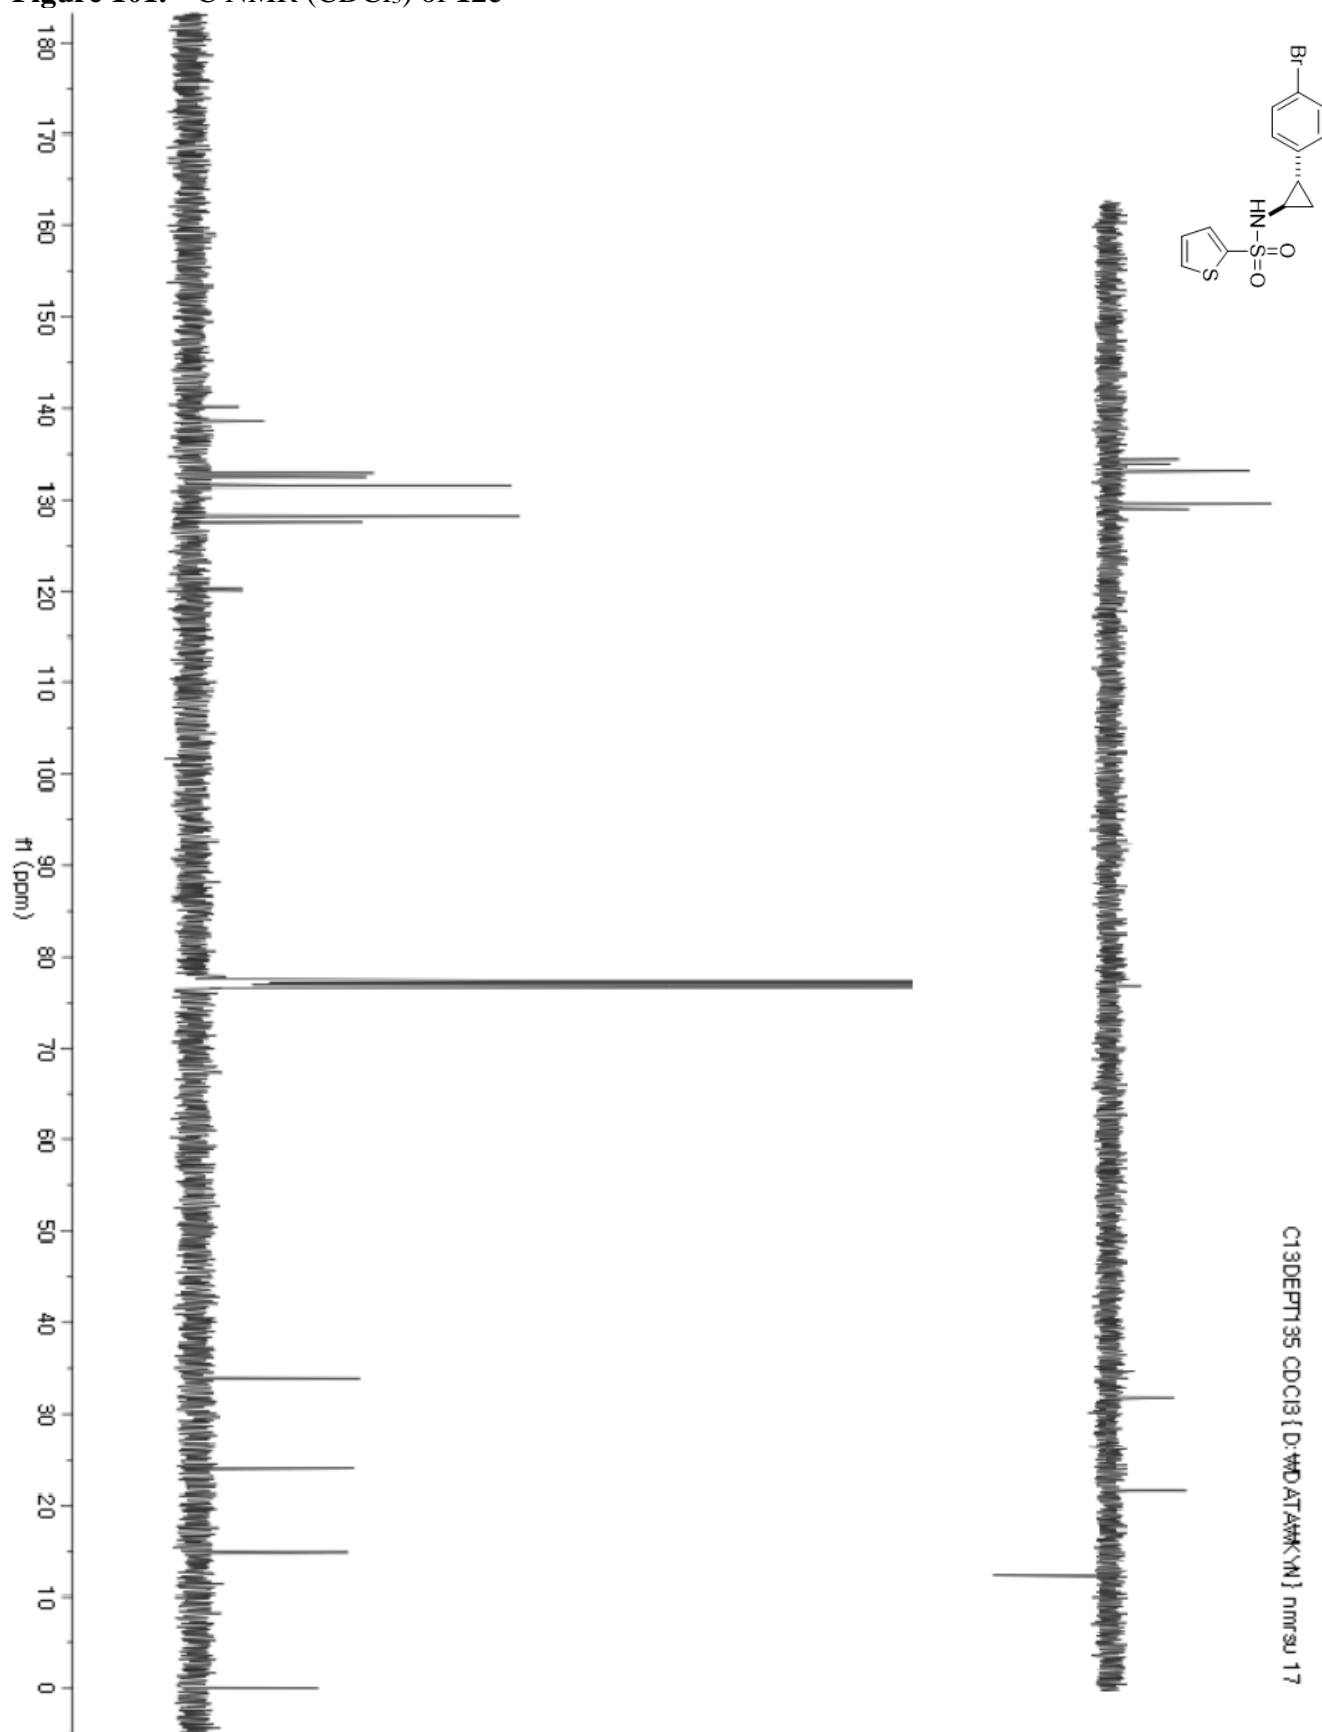

Figure 102.  $^1\text{H}$  NMR ( $\text{CDCl}_3$ ) of 12d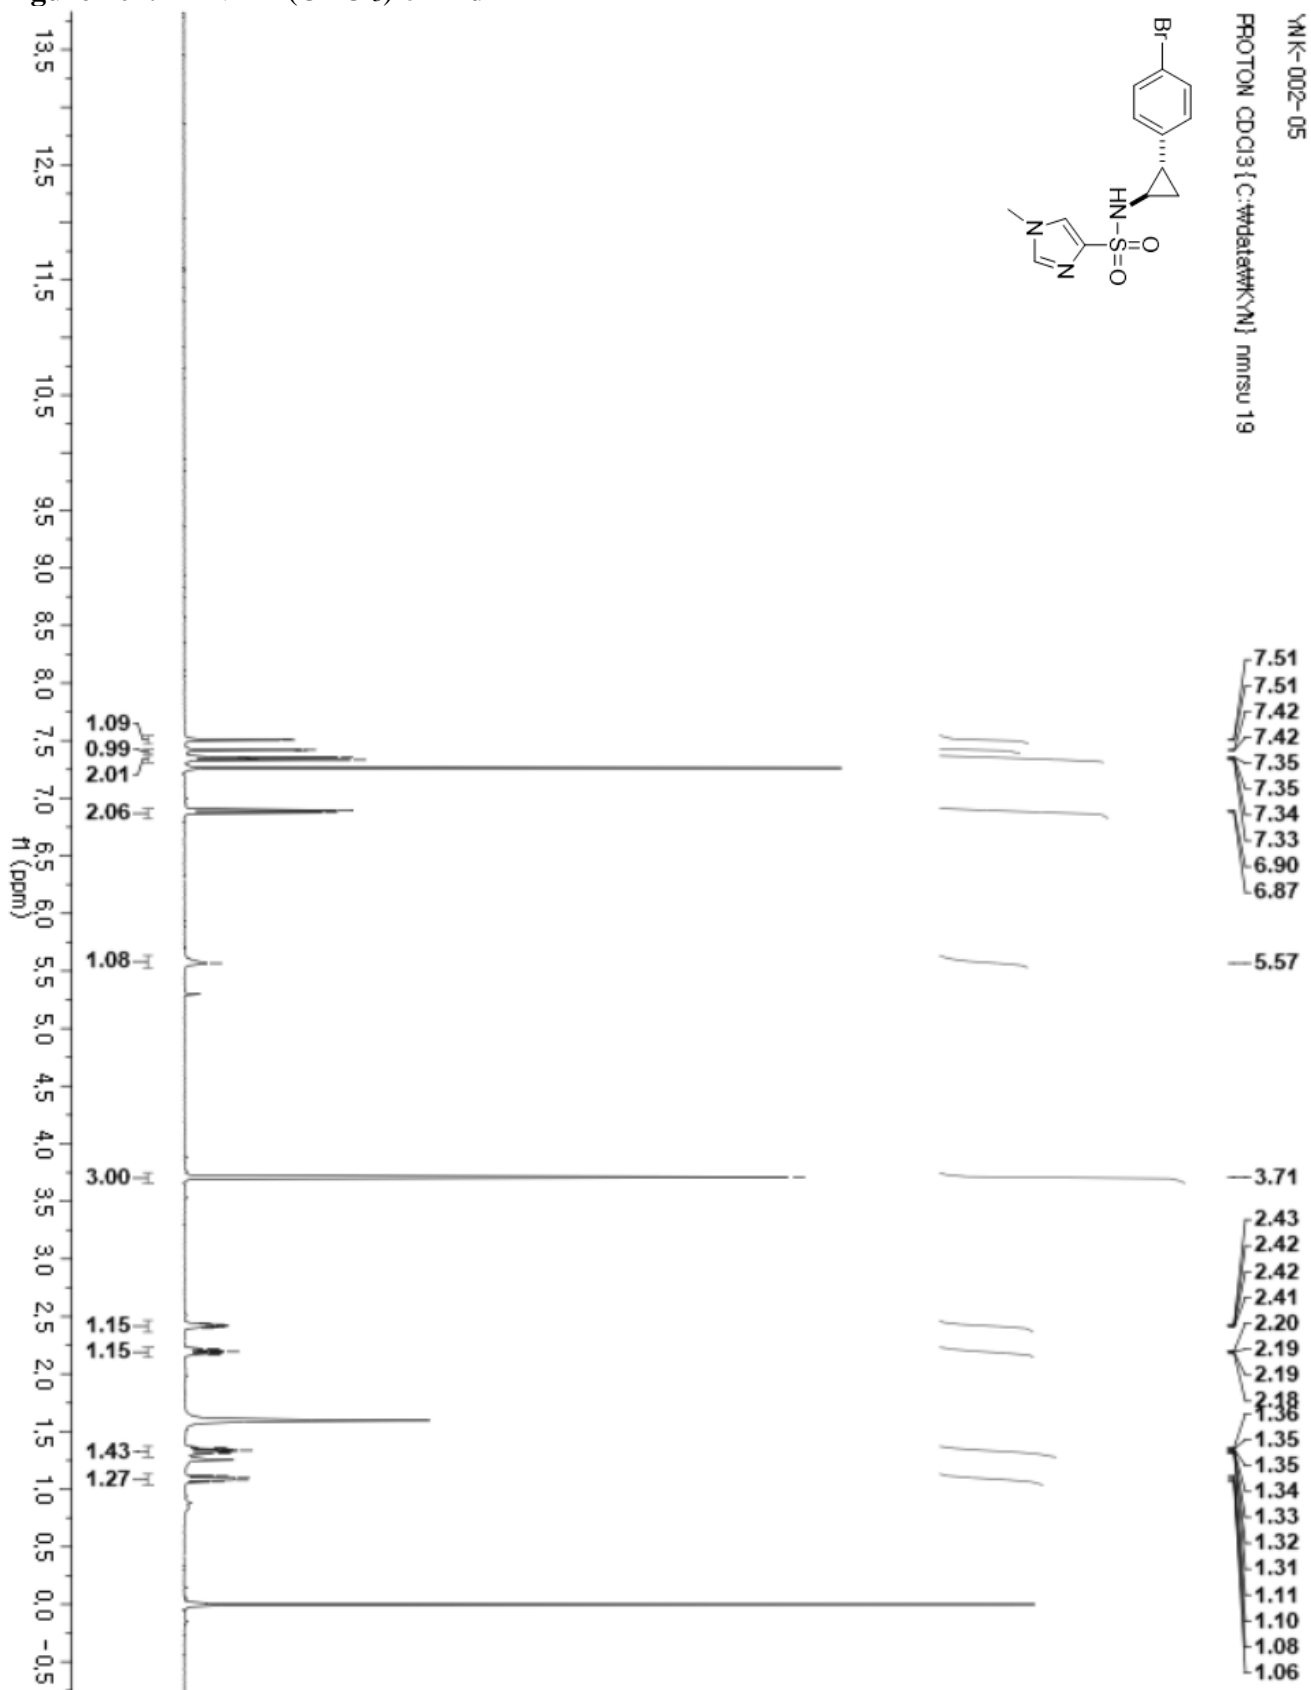

**Figure 103.**  $^{13}\text{C}$  NMR ( $\text{CDCl}_3$ ) of **12d**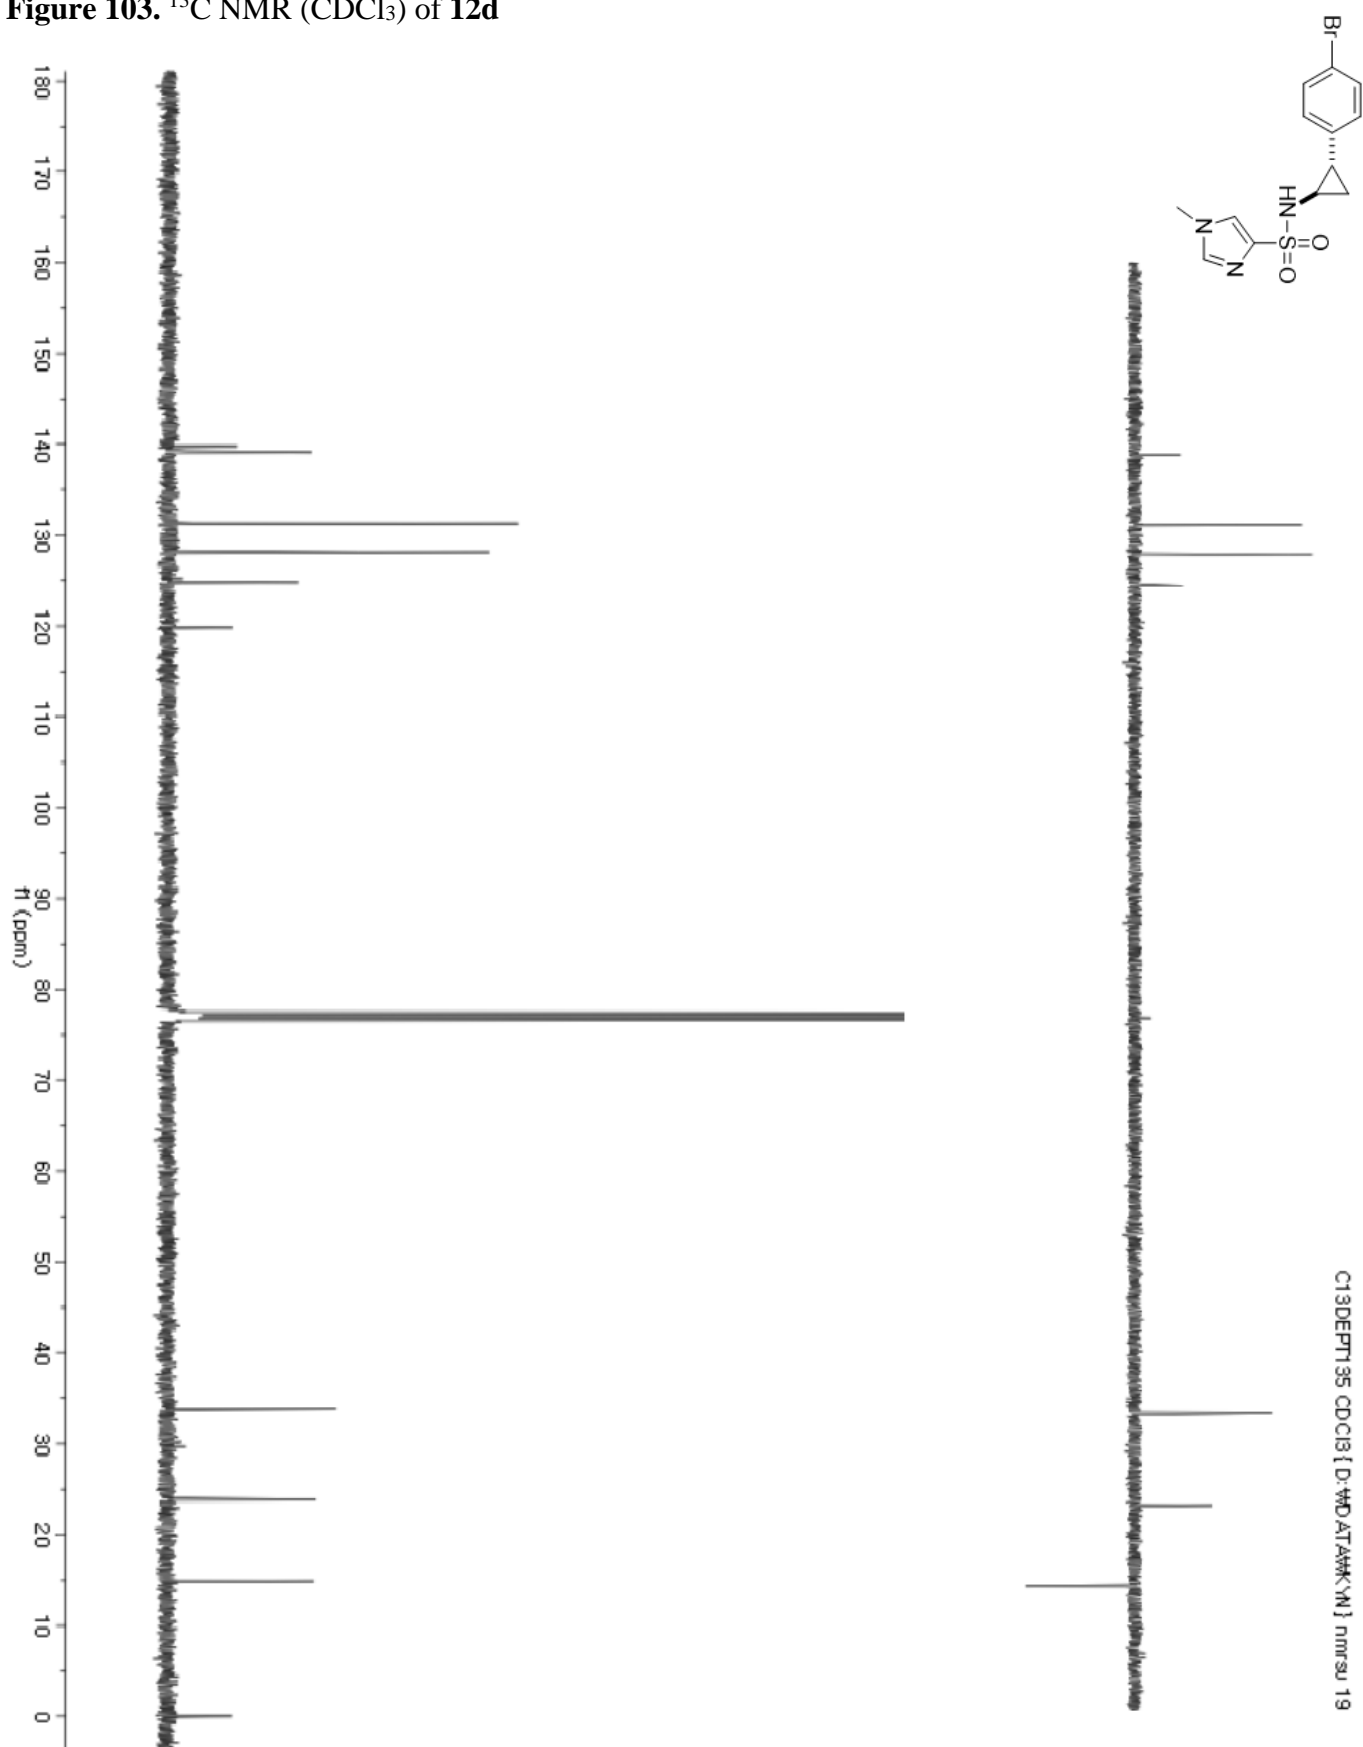

Figure 104.  $^1\text{H}$  NMR ( $\text{CDCl}_3$ ) of **12e**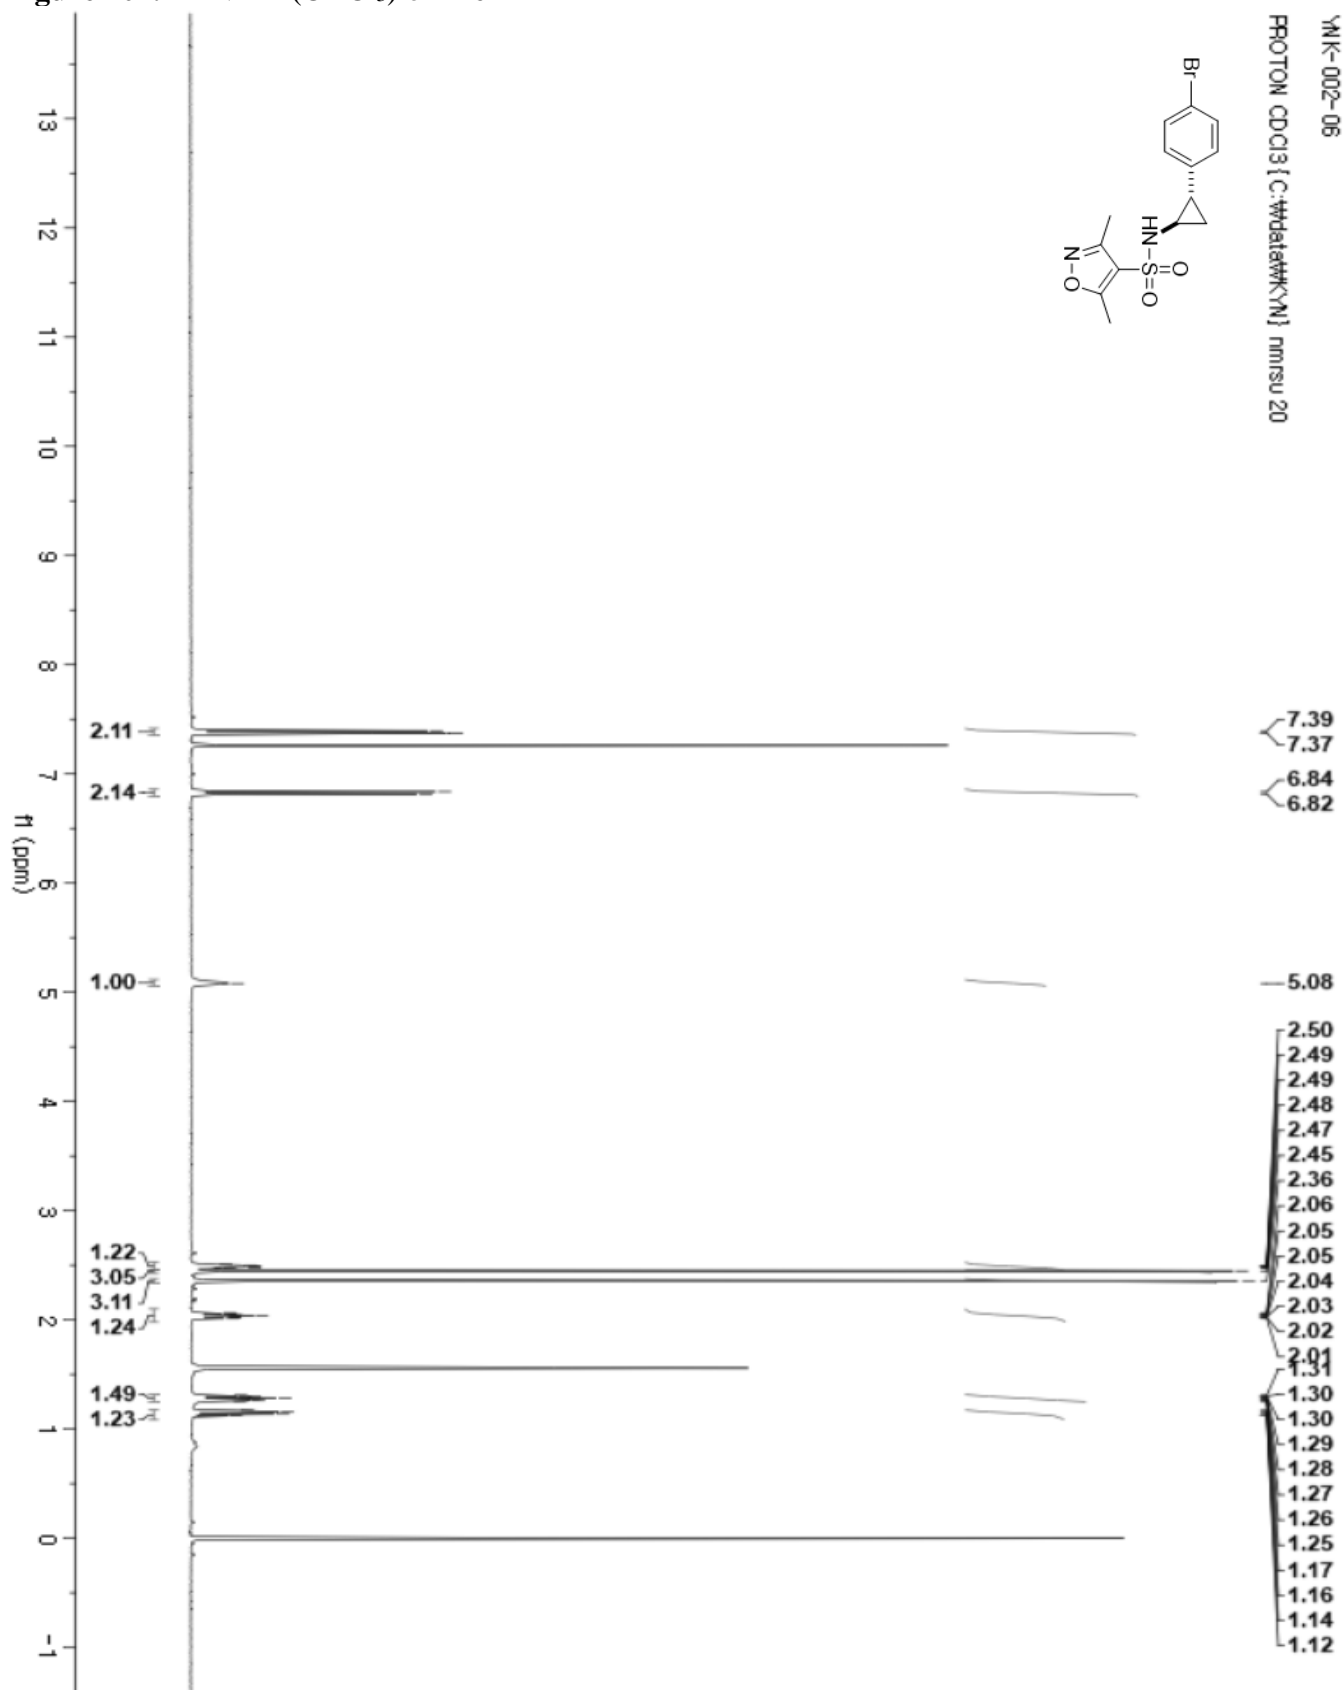



**Figure 105.**  $^{13}\text{C}$  NMR ( $\text{CDCl}_3$ ) of **12e**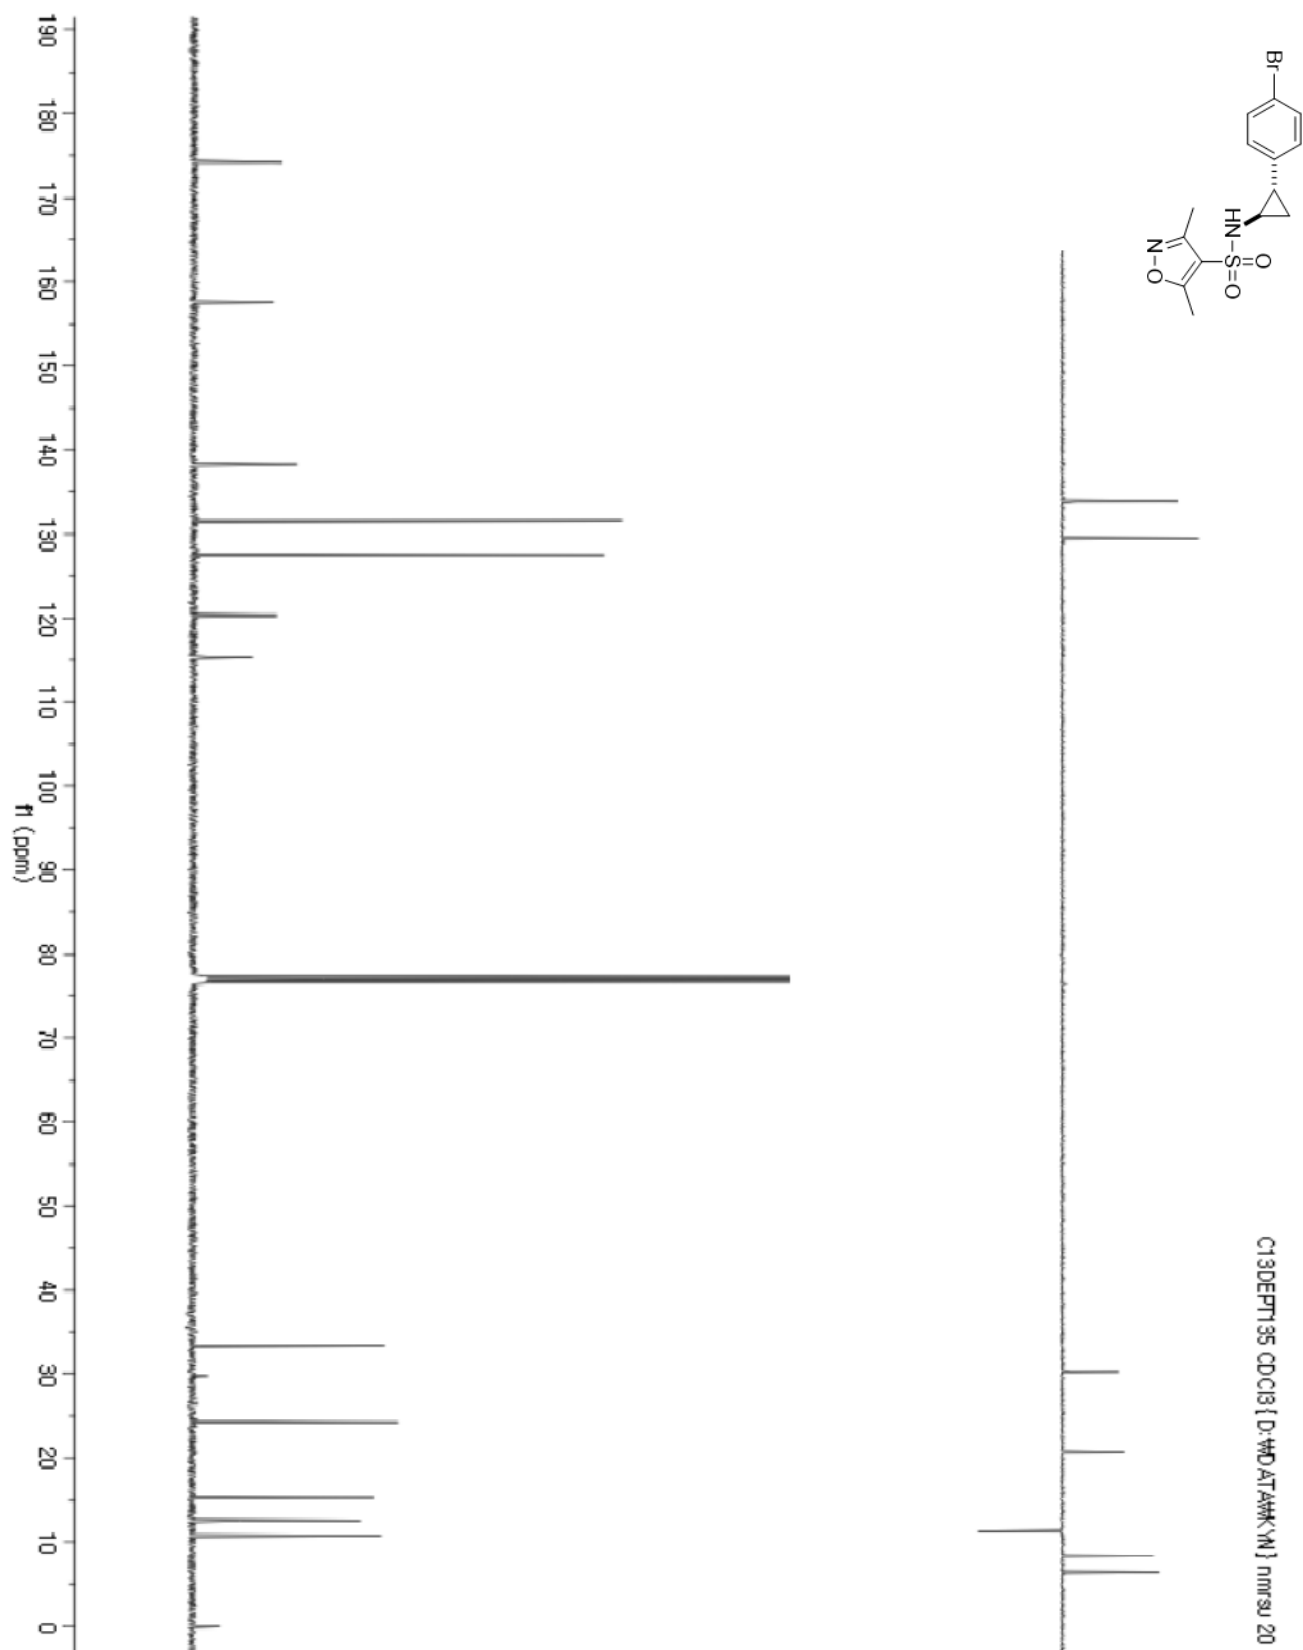

Figure 106.  $^1\text{H}$  NMR ( $\text{CDCl}_3$ ) of **12f**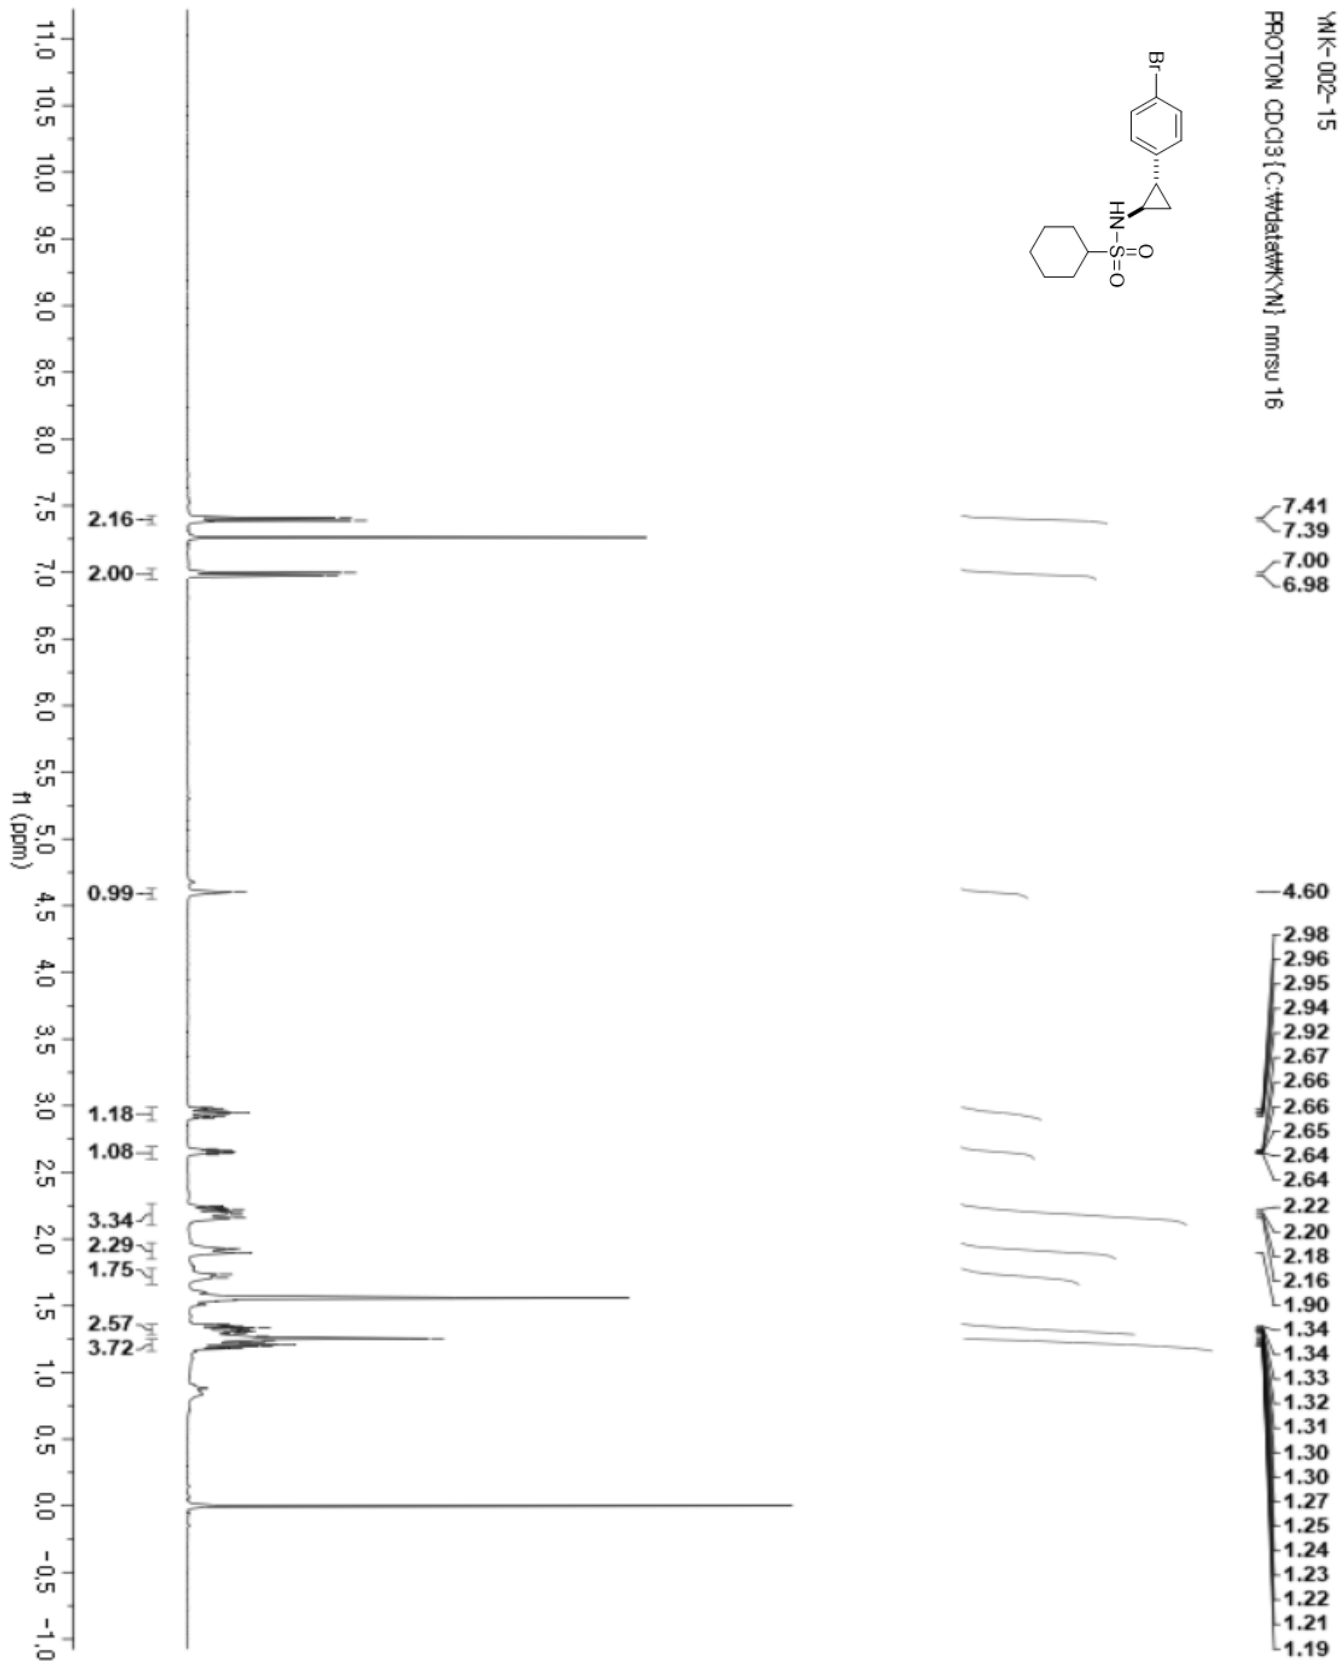

**Figure 107.**  $^{13}\text{C}$  NMR ( $\text{CDCl}_3$ ) of **12f**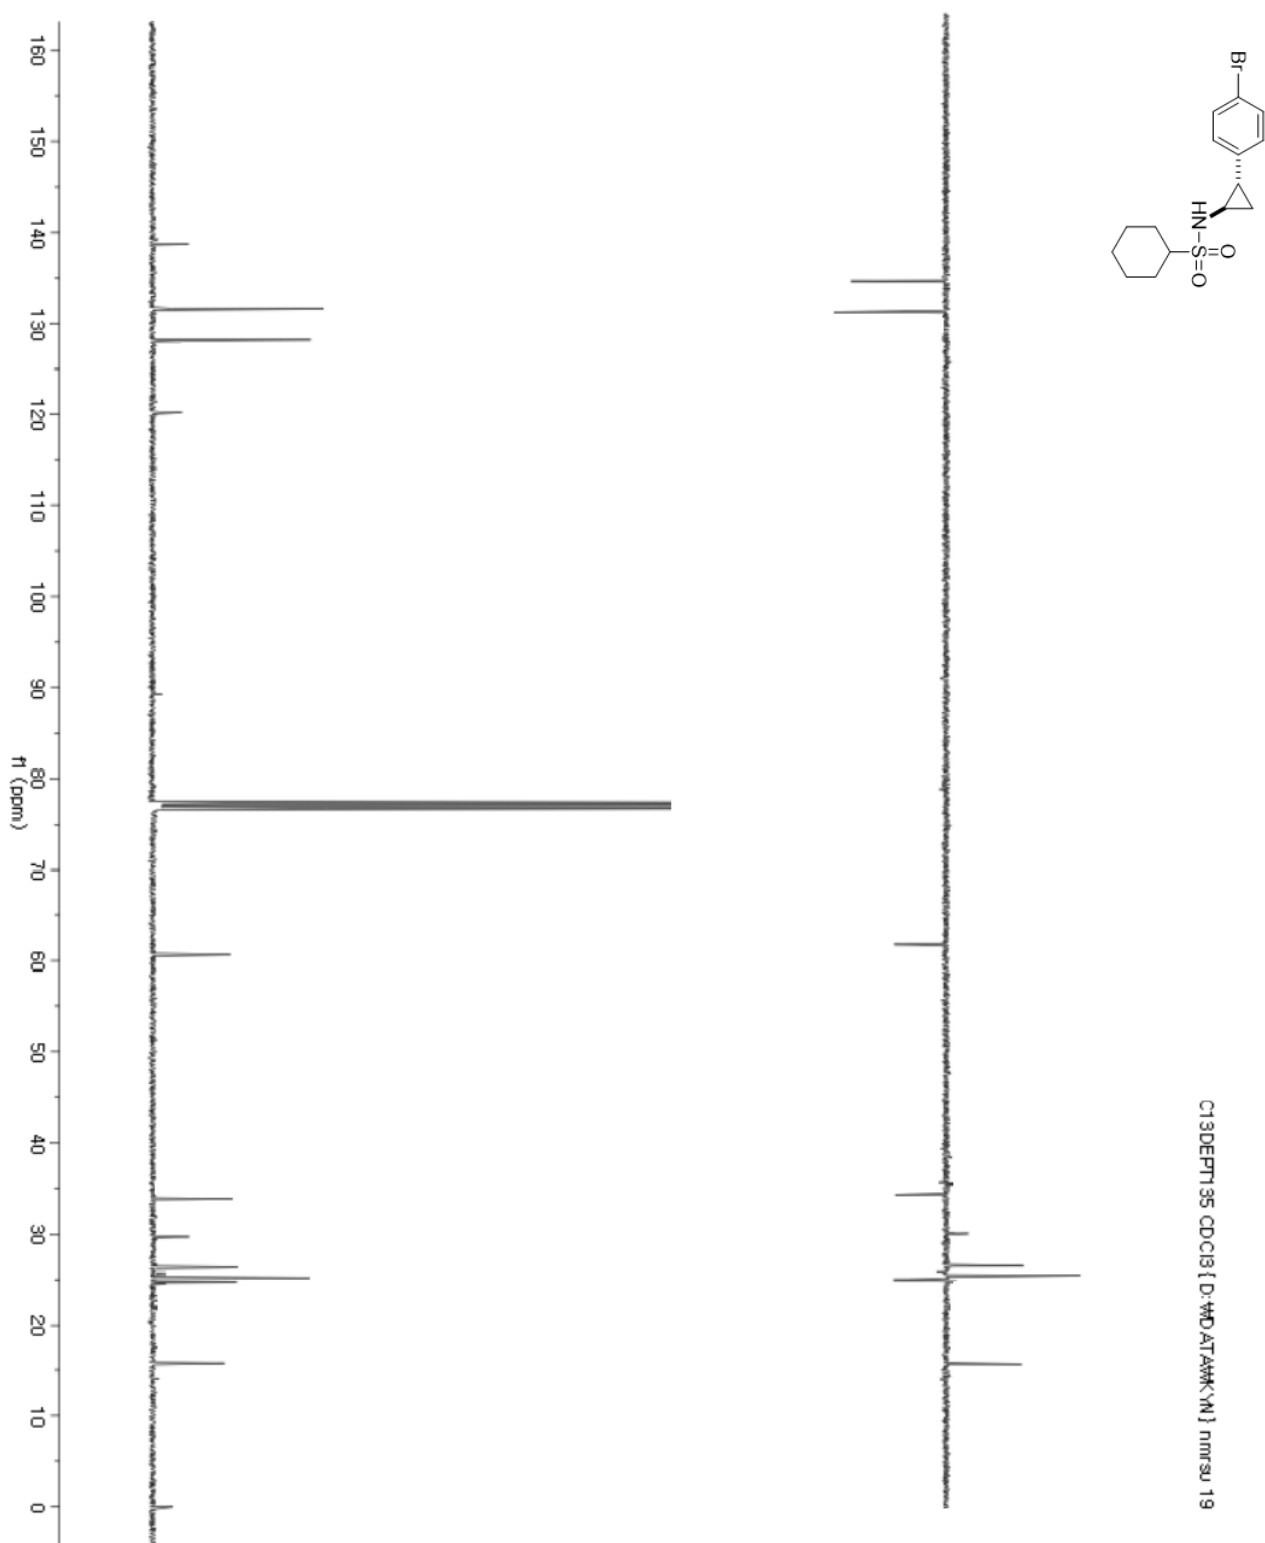

Supplement: d3ra07830b2.pdf [file d3ra07830b2.pdf]
