# Supplementary material for: Photocatalytic intermolecular bromonitroalkylation of styrenes: synthesis of cyclopropylamine derivatives and their evaluation as LSD1 inhibitors
Source: Royal Society of Chemistry journal article supplement (doi:10.1039/d3ra07830b), 2024-01-01
Supplement: d3ra07830b1.pdf [file d3ra07830b1.pdf]

## Supporting Information

### Photocatalytic Intermolecular Bromonitroalkylation of Styrenes: Synthesis of Cyclopropylamine Derivatives and their Evaluation as LSD1 Inhibitors

Darong Kim<sup>†</sup>, Hui-Jeon Jeon<sup>†</sup>, Yoonna Kwak<sup>†</sup>, Sun Joo Lee<sup>†</sup>, Tae-Gyu Nam<sup>‡</sup>, Ji Hoon Yu<sup>†</sup>, Hongchan An<sup>§</sup> and Ki Bum Hong<sup>†,\*</sup>

<sup>†</sup> *New Drug Development Center (NDDC), Daegu-Gyeongbuk Medical Innovation Foundation (DGMIF), 80 Cheombok-ro, Dong-gu, Daegu 41061, Republic of Korea*

<sup>‡</sup> *Department of Pharmacy and Institute of Pharmaceutical Science and Technology, Hanyang University, Ansan, Gyeonggi-do 15588, Republic of Korea*

<sup>§</sup> *College of Pharmacy and Institute of Pharmaceutical Sciences, CHA University, 120 Haeryong-ro, Pocheon-si, Gyeonggi-do 11160, Republic of Korea*

To whom correspondence should be addressed. E-mail: [kbhong@kmedihub.re.kr](mailto:kbhong@kmedihub.re.kr) (K.B. Hong)

#### TABLE OF CONTENT

|                                                                                               |          |
|-----------------------------------------------------------------------------------------------|----------|
| <b>1. Generals</b> .....                                                                      | <b>2</b> |
| <b>2. Synthesis and characterization of new compounds</b> .....                               | <b>2</b> |
| A. General procedure for photocatalytic intermolecular bromonitroalkylation of styrenes ..... | <b>2</b> |
| B. General procedure for base promoted cyclization .....                                      | <b>6</b> |

## 1. Generals

For irradiation, blue LED lamps (Kessil A160WE, purchased from amazon.com) were placed 4 centimeters away from the reaction vials. Unless otherwise noted, all solvents and reagents including styrenes, ethyl 2-bromo-2,2-difluoroacetate and photocatalysts were purchased from commercial suppliers (Sigma-Aldrich, TCI, Alfa-Aesar, and Angene) and used without further purification. All reactions were performed under an atmosphere of dry argon. Thin Layer Chromatography (TLC) was performed on Merck (Silica gel 60, F-254, 0.25 mm). Chromatographic purifications were performed under gradient using a Combiflash® system and prepacked disposable silica cartridges using commercial 60 Å silica gel. NMR spectra were recorded on a Bruker AVANCE III HD (400, 101 and 376 MHz for  $^1\text{H}$ ,  $^{13}\text{C}$ , and  $^{19}\text{F}$  NMR respectively) spectrometer. Chemical shifts are reported as  $\delta$  values in parts per million downfield from solvents as internal standards ( $\text{CDCl}_3$ : 7.26 ppm for  $^1\text{H}$  NMR and 77.04 ppm for  $^{13}\text{C}$  NMR, MeOD: 3.31 ppm for  $^1\text{H}$  NMR and 49.00 ppm for  $^{13}\text{C}$  NMR). High resolution mass spectra (HRMS) were obtained by electron impact (EI) and fast atom bombardment (FAB) ionization technique (JMS 700, Joel, Japan, magnetic sector – electric sector double focusing mass analyzer) from the KBSI (Korea Basic Science Institute Daegu Center).

## 2. Synthesis and characterization of new compounds

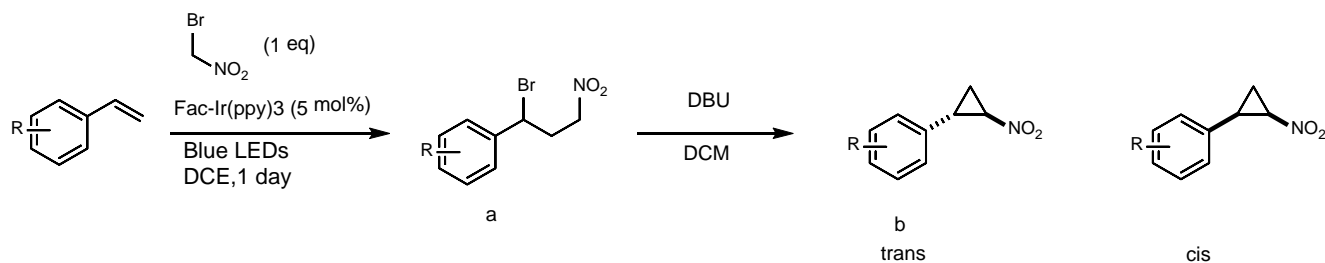

### General procedure for photocatalytic intermolecular bromonitroalkylation of styrenes (A)

To a vial equipped with a stir bar was added the styrene (52 mg, 500  $\mu\text{mol}$ ), *fac*-Ir(ppy)<sub>3</sub> (16 mg, 25  $\mu\text{mol}$ ), bromonitromethane (70 mg, 500  $\mu\text{mol}$ ), and DCE (1 mL). The resulting mixture was allowed to stir for 24 h with blue LEDs. The resulting solution was extracted with dichloromethane, dried over  $\text{Na}_2\text{SO}_4$ , filtered, and concentrated in vacuo. Flash column chromatography of the residue ( $\text{SiO}_2$ , 20% ethyl acetate in hexanes) afforded the desired product as a colorless oil.

### General procedure for base promoted cyclization (B)

To a vial equipped with a stir bar was added A (49 mg, 200  $\mu\text{mol}$ ), DBU (30 mg, 200  $\mu\text{mol}$ ), and DCM (1 mL). The resulting mixture was allowed to stir at rt for 1 h. The resulting solution was extracted with dichloromethane, dried over  $\text{Na}_2\text{SO}_4$ , filtered, and concentrated in vacuo. Flash column chromatography of the residue ( $\text{SiO}_2$ , 20% ethyl acetate in hexanes) afforded the desired product as a colorless oil.

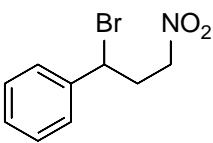 **(1-bromo-3-nitropropyl)benzene (8b).** To a vial equipped with a stir bar was added Styrene (52 mg, 500  $\mu\text{mol}$ ), *fac*-Ir(ppy)<sub>3</sub> (16 mg, 25  $\mu\text{mol}$ ), bromonitromethane (70 mg, 500  $\mu\text{mol}$ ), and DCE (1 mL). The resulting mixture was allowed to stir for 24 h with blue LEDs. The resulting solution was extracted with dichloromethane, dried over  $\text{Na}_2\text{SO}_4$ , filtered, and concentrated in vacuo. Flash column chromatography of the residue ( $\text{SiO}_2$ , 20% ethyl acetate in hexanes) afforded the desired product as a colorless oil.  $R_f$  = 0.27 (20% EtOAc/hexanes);  $^1\text{H}$  NMR (400 MHz,  $\text{CDCl}_3$ )  $\delta$  7.45 – 7.30 (m, 5H), 5.08 – 5.00 (m, 1H), 4.54 (dtd,  $J$  = 20.3, 13.9, 6.7 Hz, 2H), 2.95 – 2.70 (m, 2H);  $^{13}\text{C}$  NMR (101 MHz,  $\text{CDCl}_3$ ) ppm 140.16, 129.12, 129.11, 127.19, 73.46, 50.19, 36.97; HRMS (ESI): Exact mass calcd for  $\text{C}_9\text{H}_{10}\text{BrNO}_2$   $[M]^+$  242.9895, found 242.9898.

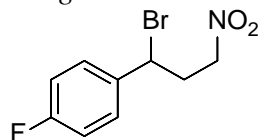

**1-(1-bromo-3-nitropropyl)-4-fluorobenzene (8c).** To a vial equipped with a stir bar was added 1-fluoro-4-vinylbenzene (61 mg, 500  $\mu\text{mol}$ ), *fac*-Ir(ppy)<sub>3</sub> (16 mg, 25  $\mu\text{mol}$ ), bromonitromethane (70 mg, 500  $\mu\text{mol}$ ), and DCE (1 mL). The resulting mixture was allowed to stir for 24 h with blue LEDs. The resulting solution was extracted with dichloromethane, dried over Na<sub>2</sub>SO<sub>4</sub>, filtered, and concentrated in vacuo. Flash column chromatography of the residue (SiO<sub>2</sub>, 20% ethyl acetate in hexanes) afforded the desired product as a colorless oil.  $R_f$  = 0.21 (20% EtOAc/hexanes); <sup>1</sup>H NMR (400 MHz, CDCl<sub>3</sub>)  $\delta$  7.45 – 7.34 (m, 2H), 7.14 – 6.99 (m, 2H), 5.04 (dd,  $J$  = 9.3, 5.7 Hz, 1H), 4.65 – 4.45 (m, 2H), 2.90 – 2.69 (m, 2H). <sup>13</sup>C NMR (101 MHz, CDCl<sub>3</sub>)  $\delta$  163.97, 161.50, 136.19, 129.05, 116.19, 115.98, 73.38, 49.28, 37.07.; HRMS (ESI): Exact mass calcd for C<sub>9</sub>H<sub>9</sub>BrFNO<sub>2</sub> [M+H]<sup>+</sup> 260.9801, found 261.9696

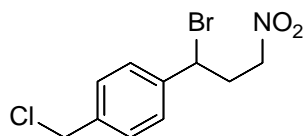

**1-(1-bromo-3-nitropropyl)-4-(chloromethyl)benzene (8d).** To a vial equipped with a stir bar was added 1-(chloromethyl)-4-vinylbenzene (76 mg, 500  $\mu\text{mol}$ ), *fac*-Ir(ppy)<sub>3</sub> (16 mg, 25  $\mu\text{mol}$ ), bromonitromethane (70 mg, 500  $\mu\text{mol}$ ), and DCE (1 mL). The resulting mixture was allowed to stir for 24 h with blue LEDs. The resulting solution was extracted with dichloromethane, dried over Na<sub>2</sub>SO<sub>4</sub>, filtered, and concentrated in vacuo. Flash column chromatography of the residue (SiO<sub>2</sub>, 20% ethyl acetate in hexanes) afforded the desired product as a colorless oil.  $R_f$  = 0.3 (20% EtOAc/hexanes); <sup>1</sup>H NMR (400 MHz, CDCl<sub>3</sub>)  $\delta$  7.39 (d,  $J$  = 5.8 Hz, 4H), 5.04 (dd,  $J$  = 9.3, 5.7 Hz, 1H), 4.62 (dd,  $J$  = 7.4, 6.5 Hz, 1H), 4.58 (s, 2H), 4.50 (dt,  $J$  = 6.2, 4.3 Hz, 1H), 2.94 – 2.71 (m, 2H).; <sup>13</sup>C NMR (101 MHz, CDCl<sub>3</sub>)  $\delta$  140.36, 138.41, 129.28, 127.61, 73.37, 49.50, 45.48, 36.85. ; HRMS (ESI): Exact mass calcd for C<sub>10</sub>H<sub>11</sub>BrClNO<sub>2</sub> [M+]<sup>+</sup> 290.9662, found 290.9200.

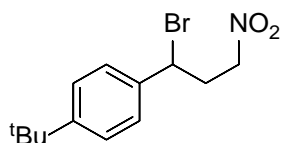

**1-(1-bromo-3-nitropropyl)-4-(tert-butyl)benzene (8e).** To a vial equipped with a stir bar was added 1-(tert-butyl)-4-vinylbenzene (80 mg, 500  $\mu\text{mol}$ ), *fac*-Ir(ppy)<sub>3</sub> (16 mg, 25  $\mu\text{mol}$ ), Bromonitromethane (70 mg, 500  $\mu\text{mol}$ ), and DCE(1 mL). The resulting mixture was allowed to stir at rt for 24 h with blue LEDs. The resulting solution was extracted with dichloromethane, dried over Na<sub>2</sub>SO<sub>4</sub>, filtered, and concentrated in vacuo. Flash column chromatography of the residue (SiO<sub>2</sub>, 20% ethyl acetate in hexanes) afforded the desired product as a colorless oil.  $R_f$  = 0.25 (20% EtOAc/hexanes); <sup>1</sup>H NMR (400 MHz, CDCl<sub>3</sub>)  $\delta$  7.41 – 7.37 (m, 2H), 7.36 – 7.27 (m, 2H), 5.08 – 5.01 (m, 1H), 4.54 (dtd,  $J$  = 20.3, 13.9, 6.7 Hz, 2H), 2.99 – 2.71 (m, 2H), 1.32 (s, 9H).; <sup>13</sup>C NMR (101 MHz, CDCl<sub>3</sub>)  $\delta$  152.31, 137.11, 126.87, 126.03, 73.54, 50.29, 36.97, 34.72, 31.26.; HRMS (ESI): Exact mass calcd for C<sub>13</sub>H<sub>18</sub>BrNO<sub>2</sub> [M]<sup>+</sup> 299.0521, found 299.0519.

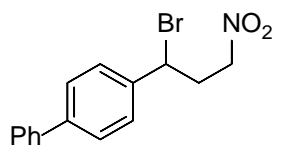

**4-(1-bromo-3-nitropropyl)-1,1'-biphenyl (8f).** To a vial equipped with a stir bar was added 4-vinyl-1,1'-biphenyl (90 mg, 500  $\mu\text{mol}$ ), *fac*-Ir(ppy)<sub>3</sub> (16 mg, 25  $\mu\text{mol}$ ), bromonitromethane (70 mg, 500  $\mu\text{mol}$ ), and DCE (1 mL). The resulting mixture was allowed to stir for 24 h with blue LEDs. The resulting solution was extracted with dichloromethane, dried over Na<sub>2</sub>SO<sub>4</sub>, filtered, and concentrated in vacuo. Flash column chromatography of the residue (SiO<sub>2</sub>, 20% ethyl acetate in hexanes) afforded the desired product as a colorless oil.  $R_f$  = 0.22 (20% EtOAc/hexanes); <sup>1</sup>H NMR (400 MHz, CDCl<sub>3</sub>)  $\delta$  7.59 (t,  $J$  = 7.9 Hz, 4H), 7.51 – 7.42 (m, 4H), 7.38 (t,  $J$  = 7.3 Hz, 1H), 5.11 (dd,  $J$  = 9.1, 5.8 Hz, 1H), 4.59 (dtd,  $J$  = 20.3, 13.9, 6.7 Hz, 2H), 2.99 – 2.79 (m, 2H).; <sup>13</sup>C NMR (101 MHz, CDCl<sub>3</sub>)  $\delta$  142.10, 140.15, 139.04, 128.90, 127.94, 127.53, 127.12, 73.46, 49.93, 36.94. ; HRMS (ESI): Exact mass calcd for C<sub>15</sub>H<sub>14</sub>BrNO<sub>2</sub> [M+]<sup>+</sup> 319.0208, found 319.0206.

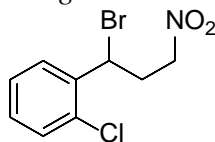

**1-(1-bromo-3-nitropropyl)-2-chlorobenzene (8g).** To a vial equipped with a stir bar was added 1-chloro-2-vinylbenzene (69 mg, 500  $\mu\text{mol}$ ), *fac*-Ir(ppy)<sub>3</sub> (16 mg, 25  $\mu\text{mol}$ ), Bromonitromethane (70 mg, 500  $\mu\text{mol}$ ), and DCE (1 mL). The resulting mixture was allowed to stir for 24 h with blue LEDs. The resulting solution was extracted with dichloromethane, dried over Na<sub>2</sub>SO<sub>4</sub>, filtered, and concentrated in vacuo. Flash column chromatography of the residue (SiO<sub>2</sub>, 20% ethyl acetate in hexanes) afforded the desired product as a colorless oil.  $R_f$  = 0.23 (20% EtOAc/hexanes); <sup>1</sup>H NMR (400 MHz, CDCl<sub>3</sub>)  $\delta$  7.60 (d,  $J$  = 7.7 Hz, 1H), 7.33 (ddd,  $J$  = 24.2, 15.9, 7.5 Hz, 3H), 5.54 (dd,  $J$  = 9.4, 5.2 Hz, 1H), 4.60 (dd,  $J$  = 9.3, 5.1 Hz, 2H), 2.98 – 2.68 (m, 2H). <sup>13</sup>C NMR (101 MHz, CDCl<sub>3</sub>)  $\delta$  137.45, 132.71, 130.14, 130.11, 128.76, 127.80, 73.24, 45.44, 35.89. ; HRMS (ESI): Exact mass calcd for C<sub>9</sub>H<sub>9</sub>BrClNO<sub>2</sub> [M+]<sup>+</sup> 276.9505, found 276.9508.

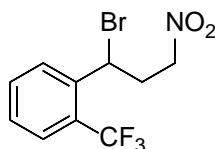

**1-(1-bromo-3-nitropropyl)-2-(trifluoromethyl)benzene (8h).** To a vial equipped with a stir bar was added 1-(trifluoromethyl)-2-vinylbenzene (86 mg, 500  $\mu\text{mol}$ ), *fac*-Ir(ppy)<sub>3</sub> (16 mg, 25  $\mu\text{mol}$ ), bromonitromethane (70 mg, 500  $\mu\text{mol}$ ), and DCE (1 mL). The resulting mixture was allowed to stir for 24 h with blue LEDs. The resulting solution was extracted with dichloromethane, dried over Na<sub>2</sub>SO<sub>4</sub>, filtered, and concentrated in vacuo. Flash column chromatography of the residue (SiO<sub>2</sub>, 20% ethyl acetate in hexanes) afforded the desired product as a colorless oil.  $R_f$  = 0.25 (20% EtOAc/hexanes); <sup>1</sup>H NMR (400 MHz, CDCl<sub>3</sub>)  $\delta$  7.83 (d,  $J$  = 8.2 Hz, 1H), 7.64 (dd,  $J$  = 7.6, 5.7 Hz, 2H), 7.45 (t,  $J$  = 7.7 Hz, 1H), 5.41 (dd,  $J$  = 9.4, 5.4 Hz, 1H), 4.65 – 4.49 (m, 2H), 2.95 – 2.73 (m, 2H).; <sup>13</sup>C NMR (101 MHz, CDCl<sub>3</sub>)  $\delta$  139.11, 132.90, 129.94, 128.94, 125.84, 125.22, 122.50, 73.13, 43.93, 37.21.; <sup>19</sup>F NMR (376 MHz, CDCl<sub>3</sub>)  $\delta$  -114.12 (tt,  $J$  = 8.5, 5.2 Hz).; HRMS (ESI): Exact mass calcd for C<sub>10</sub>H<sub>9</sub>BrF<sub>3</sub>NO<sub>2</sub> [M+]<sup>+</sup> 310.9769, found 310.9765.

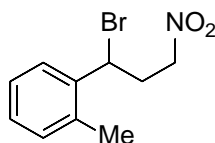

**1-(1-bromo-3-nitropropyl)-2-methylbenzene (8i).** To a vial equipped with a stir bar was added 1-methyl-2-vinylbenzene (59 mg, 500  $\mu\text{mol}$ ), *fac*-Ir(ppy)<sub>3</sub> (16 mg, 25  $\mu\text{mol}$ ), bromonitromethane (70 mg, 500  $\mu\text{mol}$ ), and DCE (1 mL). The resulting mixture was allowed to stir for 24 h with blue LEDs. The resulting solution was extracted with dichloromethane, dried over Na<sub>2</sub>SO<sub>4</sub>, filtered, and concentrated in vacuo. Flash column chromatography of the residue (SiO<sub>2</sub>, 20% ethyl acetate in hexanes) afforded the desired product as a colorless oil.  $R_f$  = 0.22 (20% EtOAc/hexanes); <sup>1</sup>H NMR (400 MHz, CDCl<sub>3</sub>)  $\delta$  7.51 – 7.42 (m, 1H), 7.29 – 7.15 (m, 3H), 5.30 (dd,  $J$  = 9.6, 5.2 Hz, 1H), 4.69 – 4.52 (m, 2H), 2.97 – 2.77 (m, 2H), 2.38 (s, 3H).; <sup>13</sup>C NMR (101 MHz, CDCl<sub>3</sub>)  $\delta$  138.11, 135.58, 131.07, 128.95, 127.00, 126.49, 73.50, 46.68, 35.92, 19.05. ; HRMS (ESI): Exact mass calcd for C<sub>10</sub>H<sub>12</sub>BrNO<sub>2</sub> [M+]<sup>+</sup> 257.0051, found 257.0048.

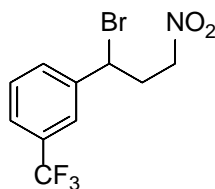

**1-(1-bromo-3-nitropropyl)-3-(trifluoromethyl)benzene (8j).** To a vial equipped with a stir bar was added 1-(trifluoromethyl)-3-vinylbenzene (86 mg, 500  $\mu\text{mol}$ ), *fac*-Ir(ppy)<sub>3</sub> (16 mg, 25  $\mu\text{mol}$ ), bromonitromethane (70 mg, 500  $\mu\text{mol}$ ), and DCE (1 mL). The resulting mixture was allowed to stir for 24 h with blue LEDs. The resulting solution was extracted with dichloromethane, dried over Na<sub>2</sub>SO<sub>4</sub>, filtered, and concentrated in vacuo. Flash column chromatography of the residue (SiO<sub>2</sub>, 20% ethyl acetate in hexanes) afforded the desired product as a colorless oil.  $R_f$  = 0.23 (20% EtOAc/hexanes); <sup>1</sup>H NMR (400 MHz, CDCl<sub>3</sub>)  $\delta$  7.67 (s, 1H), 7.61 (d,  $J$  = 7.7 Hz, 2H), 7.52 (t,  $J$  = 7.7 Hz, 1H), 5.09 (dd,  $J$  = 9.3, 5.5 Hz, 1H), 4.60 (dtd,  $J$  = 20.2, 13.9, 6.6 Hz, 2H), 2.92 – 2.73 (m, 2H).; <sup>13</sup>C NMR (101 MHz, CDCl<sub>3</sub>)  $\delta$  141.33, 131.67, 131.34, 130.63, 129.73, 125.88, 124.02, 73.22, 48.78, 36.76.; <sup>19</sup>F NMR (376 MHz, CDCl<sub>3</sub>)  $\delta$  -58.72 (s).; HRMS (ESI): Exact mass calcd for C<sub>10</sub>H<sub>9</sub>BrF<sub>3</sub>NO<sub>2</sub> [M-F]<sup>+</sup> 310.9769, found 291.9787.

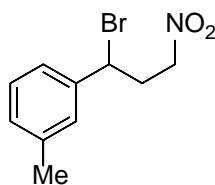

**1-(1-bromo-3-nitropropyl)-3-methylbenzene (8k).** To a vial equipped with a stir bar was added 1-methyl-3-vinylbenzene (59 mg, 500  $\mu$ mol), *fac*-Ir(ppy)<sub>3</sub> (16 mg, 25  $\mu$ mol), bromonitromethane (70 mg, 500  $\mu$ mol), and DCE (1 mL). The resulting mixture was allowed to stir for 24 h with blue LEDs. The resulting solution was extracted with dichloromethane, dried over Na<sub>2</sub>SO<sub>4</sub>, filtered, and concentrated in vacuo. Flash column chromatography of the residue (SiO<sub>2</sub>, 20% ethyl acetate in hexanes) afforded the desired product as a colorless oil. *R*<sub>f</sub> = 0.23 (20% EtOAc/hexanes); <sup>1</sup>H NMR (400 MHz, CDCl<sub>3</sub>)  $\delta$  7.26 (dd, *J* = 8.9, 6.1 Hz, 1H), 7.22 – 7.12 (m, 3H), 5.01 (dd, *J* = 9.1, 5.8 Hz, 1H), 4.54 (dtd, *J* = 20.4, 13.9, 6.7 Hz, 2H), 2.94 – 2.69 (m, 2H), 2.36 (s, 3H).; <sup>13</sup>C NMR (101 MHz, CDCl<sub>3</sub>)  $\delta$  140.05, 138.91, 129.91, 128.97, 127.82, 124.20, 73.48, 50.31, 36.97, 21.39. ; HRMS (ESI): Exact mass calcd for C<sub>10</sub>H<sub>12</sub>BrNO<sub>2</sub> [M]<sup>+</sup> 257.0051, found 257.0047.

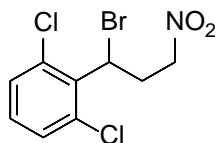

**2-(1-bromo-3-nitropropyl)-1,3-dichlorobenzene (8l).** To a vial equipped with a stir bar was added 1,3-dichloro-2-vinylbenzene (87 mg, 500  $\mu$ mol), *fac*-Ir(ppy)<sub>3</sub> (16 mg, 25  $\mu$ mol), bromonitromethane (70 mg, 500  $\mu$ mol), and DCE (1 mL). The resulting mixture was allowed to stir for 24 h with blue LEDs. The resulting solution was extracted with dichloromethane, dried over Na<sub>2</sub>SO<sub>4</sub>, filtered, and concentrated in vacuo. Flash column chromatography of the residue (SiO<sub>2</sub>, 20% ethyl acetate in hexanes) afforded the desired product as a colorless oil. *R*<sub>f</sub> = 0.25 (20% EtOAc/hexanes); <sup>1</sup>H NMR (400 MHz, CDCl<sub>3</sub>)  $\delta$  7.38 – 7.31 (m, 2H), 7.21 (t, *J* = 8.0 Hz, 1H), 5.93 (dd, *J* = 9.6, 5.7 Hz, 1H), 4.62 – 4.45 (m, 2H), 3.33 (ddt, *J* = 15.6, 9.6, 6.0 Hz, 1H), 2.96 (dt, *J* = 14.3, 6.0 Hz, 1H).; <sup>13</sup>C NMR (101 MHz, CDCl<sub>3</sub>)  $\delta$  136.23, 134.90, 133.74, 130.90, 130.33, 128.86, 73.08, 43.22, 33.08. ; HRMS (ESI): Exact mass calcd for C<sub>9</sub>H<sub>8</sub>BrCl<sub>2</sub>NO<sub>2</sub> [M]<sup>+</sup> 312.9720, found 312.9098.

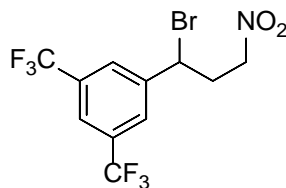

**1-(1-bromo-3-nitropropyl)-3,5-bis(trifluoromethyl)benzene (8m).** To a vial equipped with a stir bar was added 1,3-bis(trifluoromethyl)-5-vinylbenzene (120 mg, 500  $\mu$ mol), *fac*-Ir(ppy)<sub>3</sub> (16 mg, 25  $\mu$ mol), bromonitromethane (70 mg, 500  $\mu$ mol), and DCE (1 mL). The resulting mixture was allowed to stir for 24 h with blue LEDs. The resulting solution was extracted with dichloromethane, dried over Na<sub>2</sub>SO<sub>4</sub>, filtered, and concentrated in vacuo. Flash column chromatography of the residue (SiO<sub>2</sub>, 20% ethyl acetate in hexanes) afforded the desired product as a colorless oil. *R*<sub>f</sub> = 0.25 (20% EtOAc/hexanes); <sup>1</sup>H NMR (400 MHz, CDCl<sub>3</sub>)  $\delta$  7.89 (d, *J* = 8.2 Hz, 3H), 5.16 (t, *J* = 7.4 Hz, 1H), 4.81 – 4.54 (m, 2H), 2.84 (dd, *J* = 13.3, 6.9 Hz, 2H).; <sup>13</sup>C NMR (101 MHz, CDCl<sub>3</sub>)  $\delta$  142.97, 133.06 - 132.05, 127.51, 126.95, 124.24, 122.94, 121.53, 118.82, 72.96, 47.53, 36.50. ; <sup>19</sup>F NMR (376 MHz, CDCl<sub>3</sub>)  $\delta$  -60.76 (s), -61.20 (s).; HRMS (ESI): Exact mass calcd for C<sub>11</sub>H<sub>8</sub>BrF<sub>6</sub>NO<sub>2</sub> [M-F]<sup>+</sup> 378.9643, found 359.9660.

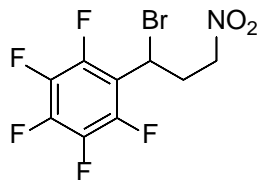

**1-(1-bromo-3-nitropropyl)-2,3,4,5,6-pentafluorobenzene (8n).** To a vial equipped with a stir bar was added 1,2,3,4,5-pentafluoro-6-vinylbenzene (97 mg, 500  $\mu$ mol), *fac*-Ir(ppy)<sub>3</sub> (16 mg, 25  $\mu$ mol), bromonitromethane (70 mg, 500  $\mu$ mol), and DCE (1 mL). The resulting mixture was allowed to stir for 24 h with blue LEDs. The resulting solution was extracted with dichloromethane, dried over Na<sub>2</sub>SO<sub>4</sub>, filtered, and concentrated in vacuo. Flash column chromatography of the residue (SiO<sub>2</sub>, 20% ethyl acetate in hexanes) afforded the desired product as a colorless oil. *R*<sub>f</sub> = 0.25 (20% EtOAc/hexanes); <sup>1</sup>H NMR (400 MHz, CDCl<sub>3</sub>)  $\delta$  5.34 (dd, *J* = 10.3, 4.8 Hz, 1H), 4.74 – 4.52 (m, 2H), 3.06 (qd, *J* = 11.0, 5.7 Hz, 1H), 2.86 (ddt, *J* = 15.4, 8.3, 5.2 Hz, 1H).; <sup>13</sup>C NMR (101 MHz, CDCl<sub>3</sub>)  $\delta$  146.13 – 146.09, 143.62 - 143.58, 143.18 – 142.91, 140.62 – 140.35, 139.30 - 138.97, 114.31-113.98, 72.81, 34.99, 34.05. ; <sup>19</sup>F NMR (376 MHz, CDCl<sub>3</sub>)  $\delta$  -62.75 (s).; HRMS (ESI): Exact mass calcd for C<sub>9</sub>H<sub>5</sub>BrFNO<sub>2</sub> [M]<sup>+</sup> 332.9424, found 332.9419.

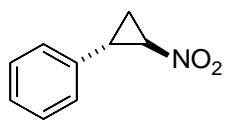

***trans*-2-nitrocyclopropylbenzene (9b).** To a vial equipped with a stir bar was added (1-bromo-3-nitropropyl)benzene (49 mg, 200  $\mu$ mol), DBU (30 mg, 200  $\mu$ mol), and DCM (1 mL). The resulting mixture was allowed to stir at rt for 1 h. The resulting solution was extracted with dichloromethane, dried over Na<sub>2</sub>SO<sub>4</sub>, filtered, and concentrated in vacuo. Flash column chromatography of the residue (SiO<sub>2</sub>, 20% ethyl acetate in hexanes) afforded the desired product as a colorless oil. *R<sub>f</sub>* = 0.33 (20% EtOAc/hexanes); <sup>1</sup>H NMR (400 MHz, CDCl<sub>3</sub>)  $\delta$  7.41 – 7.20 (m, 3H), 7.16 – 7.06 (m, 2H), 4.41 (ddd, *J* = 7.1, 3.8, 3.2 Hz, 1H), 3.13 (ddd, *J* = 10.8, 7.9, 3.0 Hz, 1H), 2.23 (ddd, *J* = 10.5, 6.2, 4.0 Hz, 1H), 1.67 (td, *J* = 7.5, 6.4 Hz, 1H); HRMS (ESI): Exact mass calcd for C<sub>9</sub>H<sub>9</sub>NO<sub>2</sub> [M]<sup>+</sup> 163.0633, found 163.0635.

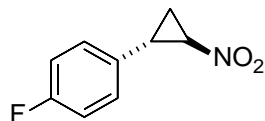

***trans*-1-fluoro-4-(2-nitrocyclopropyl)benzene (9c).** To a vial equipped with a stir bar was added 1-(1-bromo-3-nitropropyl)-4-fluorobenzene (52 mg, 200  $\mu$ mol), DBU (30 mg, 200  $\mu$ mol), and DCM (1 mL). The resulting mixture was allowed to stir at rt for 1 h. The resulting solution was extracted with dichloromethane, dried over Na<sub>2</sub>SO<sub>4</sub>, filtered, and concentrated in vacuo. Flash column chromatography of the residue (SiO<sub>2</sub>, 20% ethyl acetate in hexanes) afforded the desired product as a colorless oil. *R<sub>f</sub>* = 0.25 (20% EtOAc/hexanes); <sup>1</sup>H NMR (400 MHz, CDCl<sub>3</sub>)  $\delta$  7.14 – 7.06 (m, 2H), 7.06 – 6.96 (m, 2H), 4.42 – 4.31 (m, 1H), 3.12 (ddd, *J* = 10.8, 7.9, 3.0 Hz, 1H), 2.24 (ddd, *J* = 10.5, 6.3, 4.0 Hz, 1H), 1.64 (dd, *J* = 14.0, 7.5 Hz, 1H); <sup>13</sup>C NMR (101 MHz, CDCl<sub>3</sub>)  $\delta$  163.47, 161.02, 132.02, 128.45, 115.91, 115.69, 61.48, 28.64, 18.64; <sup>19</sup>F NMR (376 MHz, CDCl<sub>3</sub>)  $\delta$  -62.80 (s); HRMS (ESI): Exact mass calcd for C<sub>9</sub>H<sub>8</sub>FNO<sub>2</sub> [M+H]<sup>+</sup> 181.0539, found 181.0538.

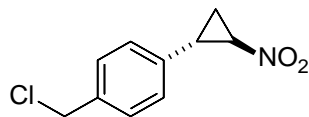

***trans*-1-(chloromethyl)-4-(2-nitrocyclopropyl)benzene (9d).** To a vial equipped with a stir bar was added 1-(1-bromo-3-nitropropyl)-4-(chloromethyl)benzene (49 mg, 200  $\mu$ mol), DBU (30 mg, 200  $\mu$ mol), and DCM (1 mL). The resulting mixture was allowed to stir at rt for 1 h. The resulting solution was extracted with dichloromethane, dried over Na<sub>2</sub>SO<sub>4</sub>, filtered, and concentrated in vacuo. Flash column chromatography of the residue (SiO<sub>2</sub>, 20% ethyl acetate in hexanes) afforded the desired product as a colorless oil. *R<sub>f</sub>* = 0.33 (20% EtOAc/hexanes); <sup>1</sup>H NMR (400 MHz, CDCl<sub>3</sub>)  $\delta$  7.35 (d, *J* = 8.1 Hz, 2H), 7.11 (t, *J* = 8.1 Hz, 2H), 4.56 (s, 2H), 4.44 – 4.33 (m, 1H), 3.13 (ddd, *J* = 10.8, 7.8, 3.1 Hz, 1H), 2.25 (ddd, *J* = 10.5, 6.3, 4.0 Hz, 1H), 1.73 – 1.62 (m, 1H). <sup>13</sup>C NMR (101 MHz, CDCl<sub>3</sub>)  $\delta$  137.12, 136.63, 129.51, 129.08, 127.14, 127.08, 61.54, 45.61, 28.96, 18.72; HRMS (ESI): Exact mass calcd for C<sub>10</sub>H<sub>10</sub>ClNO<sub>2</sub> [M]<sup>+</sup> 211.0400, found 211.0398.

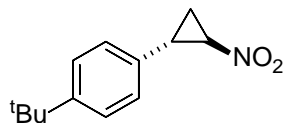

***trans*-1-(tert-butyl)-4-(2-nitrocyclopropyl)benzene (9e).** To a vial equipped with a stir bar was added 1-(1-bromo-3-nitropropyl)-4-(tert-butyl)benzene (60 mg, 200  $\mu$ mol), DBU (30 mg, 200  $\mu$ mol), and DCM (1 mL). The resulting mixture was allowed to stir at rt for 1 h. The resulting solution was extracted with dichloromethane, dried over Na<sub>2</sub>SO<sub>4</sub>, filtered, and concentrated in vacuo. Flash column chromatography of the residue (SiO<sub>2</sub>, 20% ethyl acetate in hexanes) afforded the desired product as a colorless oil. *R<sub>f</sub>* = 0.28 (20% EtOAc/hexanes); <sup>1</sup>H NMR (400 MHz, CDCl<sub>3</sub>)  $\delta$  7.40 – 7.31 (m, 2H), 7.06 (d, *J* = 8.3 Hz, 2H), 4.44 – 4.34 (m, 1H), 3.10 (ddd, *J* = 10.8, 7.9, 2.9 Hz, 1H), 2.22 (ddd, *J* = 10.4, 6.2, 3.9 Hz, 1H), 1.65 (dd, *J* = 13.9, 7.4 Hz, 1H), 1.31 (d, *J* = 3.2 Hz, 9H); <sup>13</sup>C NMR (101 MHz, CDCl<sub>3</sub>)  $\delta$  150.89, 133.34, 126.39, 125.77, 77.35, 77.04, 76.72, 61.67, 34.56, 31.27, 29.17, 18.74; HRMS (ESI): Exact mass calcd for C<sub>13</sub>H<sub>17</sub>NO<sub>2</sub> [M]<sup>+</sup> 219.1259, found 219.1260.

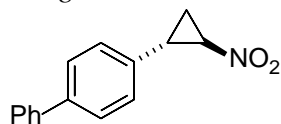

***trans*-4-(2-nitrocyclopropyl)-1,1'-biphenyl (9f).** To a vial equipped with a stir bar was added 4-(1-bromo-3-nitropropyl)-1,1'-biphenyl (64 mg, 200  $\mu$ mol), DBU (30 mg, 200  $\mu$ mol), and DCM (1 mL). The resulting mixture was allowed to stir at rt for 1 h. The resulting solution was extracted with dichloromethane, dried over  $\text{Na}_2\text{SO}_4$ , filtered, and concentrated in vacuo. Flash column chromatography of the residue ( $\text{SiO}_2$ , 20% ethyl acetate in hexanes) afforded the desired product as a colorless oil.  $R_f$  = 0.26 (20% EtOAc/hexanes);  $^1\text{H}$  NMR (400 MHz, MeOD)  $\delta$  7.60 (ddd,  $J$  = 6.3, 4.1, 1.6 Hz, 4H), 7.44 (dd,  $J$  = 10.4, 4.8 Hz, 2H), 7.34 (t,  $J$  = 7.4 Hz, 1H), 7.29 (d,  $J$  = 8.3 Hz, 2H), 4.69 – 4.58 (m, 1H), 3.16 (ddd,  $J$  = 10.8, 7.9, 3.0 Hz, 1H), 2.23 (ddd,  $J$  = 10.4, 6.2, 3.9 Hz, 1H), 1.86 – 1.74 (m, 1H).;  $^{13}\text{C}$  NMR (101 MHz, MeOD)  $\delta$  140.38, 140.27, 128.49, 127.06, 126.87, 126.78, 126.45, 61.31, 28.65, 18.04. ; HRMS (ESI): Exact mass calcd for  $\text{C}_{15}\text{H}_{13}\text{NO}_2$   $[\text{M}]^+$  239.0946, found 239.0944.

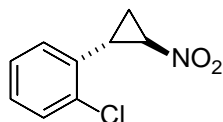

***trans*-1-chloro-2-(2-nitrocyclopropyl)benzene (9g).** To a vial equipped with a stir bar was added 1-(1-bromo-3-nitropropyl)-2-chlorobenzene (56 mg, 200  $\mu$ mol), DBU (30 mg, 200  $\mu$ mol), and DCM (1 mL). The resulting mixture was allowed to stir at rt for 1 h. The resulting solution was extracted with dichloromethane, dried over  $\text{Na}_2\text{SO}_4$ , filtered, and concentrated in vacuo. Flash column chromatography of the residue ( $\text{SiO}_2$ , 20% ethyl acetate in hexanes) afforded the desired product as a colorless oil.  $R_f$  = 0.26 (20% EtOAc/hexanes);  $^1\text{H}$  NMR (400 MHz,  $\text{CDCl}_3$ )  $\delta$  7.47 – 7.38 (m, 1H), 7.30 – 7.18 (m, 2H), 7.05 (dd,  $J$  = 6.6, 2.6 Hz, 1H), 4.33 (dt,  $J$  = 7.2, 3.6 Hz, 1H), 3.31 (ddd,  $J$  = 11.0, 8.2, 3.2 Hz, 1H), 2.27 (ddd,  $J$  = 10.4, 6.2, 3.9 Hz, 1H), 1.70 (dd,  $J$  = 14.1, 7.5 Hz, 1H).;  $^{13}\text{C}$  NMR (101 MHz,  $\text{CDCl}_3$ )  $\delta$  135.81, 133.89, 129.72, 129.15, 127.82, 127.03, 60.81, 27.61, 17.72. ; HRMS (ESI): Exact mass calcd for  $\text{C}_9\text{H}_8\text{ClNO}_2$   $[\text{M}]^+$  197.0244, found 197.0243.

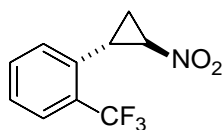

***trans*-1-(2-nitrocyclopropyl)-2-(trifluoromethyl)benzene (9h).** To a vial equipped with a stir bar was added 1-(1-bromo-3-nitropropyl)-2-(trifluoromethyl)benzene (62 mg, 200  $\mu$ mol), DBU (30 mg, 200  $\mu$ mol), and DCM (1 mL). The resulting mixture was allowed to stir at rt for 1 h. The resulting solution was extracted with dichloromethane, dried over  $\text{Na}_2\text{SO}_4$ , filtered, and concentrated in vacuo. Flash column chromatography of the residue ( $\text{SiO}_2$ , 20% ethyl acetate in hexanes) afforded the desired product as a colorless oil.  $R_f$  = 0.28 (20% EtOAc/hexanes);  $^1\text{H}$  NMR (400 MHz,  $\text{CDCl}_3$ )  $\delta$  7.70 (d,  $J$  = 7.8 Hz, 1H), 7.52 (t,  $J$  = 7.6 Hz, 1H), 7.42 (t,  $J$  = 7.6 Hz, 1H), 7.17 (d,  $J$  = 7.7 Hz, 1H), 4.39 (dt,  $J$  = 7.4, 3.7 Hz, 1H), 3.42 (t,  $J$  = 8.8 Hz, 1H), 2.27 (ddd,  $J$  = 10.5, 6.4, 4.0 Hz, 1H), 1.76 (dd,  $J$  = 14.4, 7.5 Hz, 1H).;  $^{13}\text{C}$  NMR (101 MHz,  $\text{CDCl}_3$ )  $\delta$  134.10, 132.24, 128.06, 127.81, 126.58 (q,  $J$  = 5.6 Hz), 125.48, 122.76, 60.99, 26.27 (d,  $J$  = 2.1 Hz), 17.43. ;  $^{19}\text{F}$  NMR (376 MHz,  $\text{CDCl}_3$ )  $\delta$  -62.95 (s).; HRMS (ESI): Exact mass calcd for  $\text{C}_{10}\text{H}_8\text{F}_3\text{NO}_2$   $[\text{M}+\text{H}]^+$  231.0507, found 232.0583.

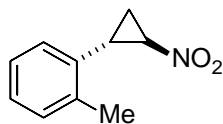

***trans*-1-methyl-2-(2-nitrocyclopropyl)benzene (9i).** To a vial equipped with a stir bar was added 1-(1-bromo-3-nitropropyl)-2-methylbenzene (52 mg, 200  $\mu$ mol), DBU (30 mg, 200  $\mu$ mol), and DCM (1 mL). The resulting mixture was allowed to stir at rt for 1 h. The resulting solution was extracted with dichloromethane, dried over  $\text{Na}_2\text{SO}_4$ , filtered, and concentrated in vacuo. Flash column chromatography of the residue ( $\text{SiO}_2$ , 20% ethyl acetate in hexanes) afforded the desired product as a colorless oil.  $R_f$  = 0.26 (20% EtOAc/hexanes);  $^1\text{H}$  NMR (400 MHz,  $\text{CDCl}_3$ )  $\delta$  7.22 – 7.19 (m, 2H), 7.19 – 7.13 (m, 1H), 6.98 (d,  $J$  = 7.4 Hz, 1H), 4.32 (dt,  $J$  = 7.1, 3.5 Hz, 1H), 3.17 – 3.05 (m, 1H), 2.38 (s, 3H), 2.29 – 2.17 (m, 1H), 1.77 – 1.65 (m, 1H).;  $^{13}\text{C}$  NMR (101 MHz,  $\text{CDCl}_3$ )  $\delta$  138.13, 134.22, 130.31, 127.92, 126.20, 126.19, 60.98, 28.17, 19.50, 17.77. ; HRMS (ESI): Exact mass calcd for  $\text{C}_{10}\text{H}_{11}\text{NO}_2$   $[\text{M}]^+$  177.0790, found 177.0788.

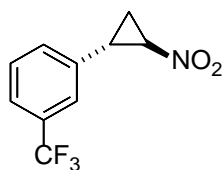

**trans-1-(2-nitrocyclopropyl)-3-(trifluoromethyl)benzene (9j).** To a vial equipped with a stir bar was added 1-(1-bromo-3-nitropropyl)-3-(trifluoromethyl)benzene (62 mg, 200  $\mu$ mol), DBU (30 mg, 200  $\mu$ mol), and DCM (1 mL). The resulting mixture was allowed to stir at rt for 1 h. The resulting solution was extracted with dichloromethane, dried over Na<sub>2</sub>SO<sub>4</sub>, filtered, and concentrated in vacuo. Flash column chromatography of the residue (SiO<sub>2</sub>, 20% ethyl acetate in hexanes) afforded the desired product as a colorless oil.  $R_f$  = 0.27 (20% EtOAc/hexanes); <sup>1</sup>H NMR (400 MHz, CDCl<sub>3</sub>)  $\delta$  7.56 (d,  $J$  = 7.8 Hz, 1H), 7.47 (t,  $J$  = 7.7 Hz, 1H), 7.38 (s, 1H), 7.33 (d,  $J$  = 7.7 Hz, 1H), 4.45 (dt,  $J$  = 6.9, 2.9 Hz, 1H), 3.20 (dd,  $J$  = 13.4, 5.0 Hz, 1H), 2.38 – 2.21 (m, 1H), 1.71 (td,  $J$  = 7.5, 0.8 Hz, 1H).; <sup>13</sup>C NMR (101 MHz, CDCl<sub>3</sub>)  $\delta$  137.35, 131.85 – 130.88(m), 130.20 (d,  $J$  = 1.1 Hz), 129.41, 125.13, 124.58 (q,  $J$  = 3.8 Hz), 123.54 (q,  $J$  = 3.8 Hz), 122.43, 61.30, 28.60, 18.53.; <sup>19</sup>F NMR (376 MHz, CDCl<sub>3</sub>)  $\delta$  -63.00 (s).; HRMS (ESI): Exact mass calcd for C<sub>10</sub>H<sub>8</sub>F<sub>3</sub>NO<sub>2</sub> [M]<sup>+</sup> 231.0507, found 231.0504.

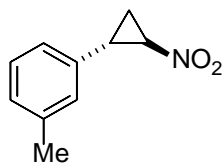

**trans-1-methyl-3-(2-nitrocyclopropyl)benzene (9k).** To a vial equipped with a stir bar was added 1-(1-bromo-3-nitropropyl)-3-methylbenzene (52 mg, 200  $\mu$ mol), DBU (30 mg, 200  $\mu$ mol), and DCM (1 mL). The resulting mixture was allowed to stir at rt for 1 h. The resulting solution was extracted with dichloromethane, dried over Na<sub>2</sub>SO<sub>4</sub>, filtered, and concentrated in vacuo. Flash column chromatography of the residue (SiO<sub>2</sub>, 20% ethyl acetate in hexanes) afforded the desired product as a colorless oil.  $R_f$  = 0.28 (20% EtOAc/hexanes); <sup>1</sup>H NMR (400 MHz, CDCl<sub>3</sub>)  $\delta$  7.21 (t,  $J$  = 7.6 Hz, 1H), 7.09 (d,  $J$  = 7.6 Hz, 1H), 6.95 – 6.86 (m, 2H), 4.45 – 4.34 (m, 1H), 3.10 (ddd,  $J$  = 10.8, 7.9, 3.0 Hz, 1H), 2.34 (s, 3H), 2.22 (ddd,  $J$  = 10.4, 6.2, 4.0 Hz, 1H), 1.66 (dd,  $J$  = 13.8, 7.5 Hz, 1H).; <sup>13</sup>C NMR (101 MHz, CDCl<sub>3</sub>)  $\delta$  138.61, 136.28, 128.73, 128.46, 127.44, 123.63, 61.63, 29.40, 21.32, 18.73. ; HRMS (ESI): Exact mass calcd for C<sub>10</sub>H<sub>11</sub>NO<sub>2</sub> [M]<sup>+</sup> 177.0790, found 177.0789.

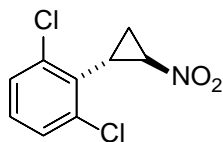

**trans-1,3-dichloro-2-(2-nitrocyclopropyl)benzene (9l).** To a vial equipped with a stir bar was added 2-(1-bromo-3-nitropropyl)-1,3-dichlorobenzene (63 mg, 200  $\mu$ mol), DBU (30 mg, 200  $\mu$ mol), and DCM (1 mL). The resulting mixture was allowed to stir at rt for 1 h. The resulting solution was extracted with dichloromethane, dried over Na<sub>2</sub>SO<sub>4</sub>, filtered, and concentrated in vacuo. Flash column chromatography of the residue (SiO<sub>2</sub>, 20% ethyl acetate in hexanes) afforded the desired product as a colorless oil.  $R_f$  = 0.28 (20% EtOAc/hexanes); <sup>1</sup>H NMR (400 MHz, CDCl<sub>3</sub>)  $\delta$  7.32 (t,  $J$  = 6.7 Hz, 2H), 7.23 – 7.13 (m, 1H), 4.48 (dt,  $J$  = 7.5, 3.9 Hz, 1H), 3.11 – 2.96 (m, 1H), 2.44 (ddd,  $J$  = 10.7, 6.6, 4.2 Hz, 1H), 1.84 – 1.72 (m, 1H).; <sup>13</sup>C NMR (101 MHz, CDCl<sub>3</sub>)  $\delta$  137.15, 131.28, 129.64, 128.74, 62.19, 26.29, 20.92.; HRMS (ESI): Exact mass calcd for C<sub>9</sub>H<sub>7</sub>Cl<sub>2</sub>NO<sub>2</sub> [M]<sup>+</sup> 230.9854, found 230.9855.

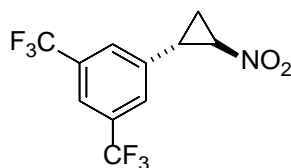

**trans-1-(2-nitrocyclopropyl)-3,5-bis(trifluoromethyl)benzene (9m).** To a vial equipped with a stir bar was added 1-(1-bromo-3-nitropropyl)-3,5-bis(trifluoromethyl)benzene (76 mg, 200  $\mu$ mol), DBU (30 mg, 200  $\mu$ mol), and DCM (1 mL). The resulting mixture was allowed to stir at rt for 1 h. The resulting solution was extracted with dichloromethane, dried over Na<sub>2</sub>SO<sub>4</sub>, filtered, and concentrated in vacuo. Flash column chromatography of the residue (SiO<sub>2</sub>, 20% ethyl acetate in hexanes) afforded the desired product as a colorless oil.  $R_f$  = 0.29 (20% EtOAc/hexanes); <sup>1</sup>H NMR (400 MHz, CDCl<sub>3</sub>)  $\delta$  7.82 (s, 1H), 7.59 (s, 2H), 4.53 – 4.41 (m, 1H), 3.27 (ddd,  $J$  = 10.8, 7.8, 3.0 Hz, 1H), 2.36 (ddd,  $J$  = 10.7, 6.6, 4.1 Hz, 1H), 1.76 (dd,  $J$  = 14.4, 7.5 Hz, 1H).; <sup>13</sup>C NMR (101 MHz, CDCl<sub>3</sub>)  $\delta$  138.89, 132.92 – 131.92(m), 127.10 (d,  $J$  = 2.6 Hz), 124.31, 121.71 (dd,  $J$  = 11.5, 7.7 Hz), 121.59, 118.88, 61.02, 27.93, 18.43.; <sup>19</sup>F NMR (376 MHz, CDCl<sub>3</sub>)  $\delta$  -140.00 (s), -151.47 – -151.92 (m), -160.10 (dt,  $J$  = 21.6, 8.2 Hz).; <sup>19</sup>F NMR (376 MHz, CDCl<sub>3</sub>)  $\delta$  -140.00 (s), -151.47 – -151.92 (m), -160.10 (dt,  $J$  = 21.6, 8.2 Hz).; HRMS (ESI): Exact mass calcd for C<sub>11</sub>H<sub>7</sub>F<sub>6</sub>NO<sub>2</sub> [M]<sup>+</sup> 299.0381, found 299.0383

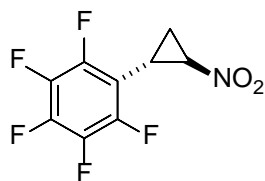

**trans-1,2,3,4,5-pentafluoro-6-(2-nitrocyclopropyl)benzene (9n).** To a vial equipped with a stir bar was added 1-(1-bromo-3-nitropropyl)-2,3,4,5,6-pentafluorobenzene (67 mg, 200  $\mu$ mol), DBU (30 mg, 200  $\mu$ mol), and DCM (1 mL). The resulting mixture was allowed to stir at rt for 1 h. The resulting solution was extracted with dichloromethane, dried over  $\text{Na}_2\text{SO}_4$ , filtered, and concentrated in vacuo. Flash column chromatography of the residue ( $\text{SiO}_2$ , 20% ethyl acetate in hexanes) afforded the desired product as a colorless oil.  $R_f$  = 0.28 (20% EtOAc/hexanes);  $^1\text{H}$  NMR (400 MHz,  $\text{CDCl}_3$ )  $\delta$  4.71 (dt,  $J$  = 7.4, 3.7 Hz, 1H), 3.09 (ddd,  $J$  = 11.1, 8.1, 3.2 Hz, 1H), 2.32 (ddd,  $J$  = 10.8, 6.4, 4.2 Hz, 1H), 1.85 (dd,  $J$  = 14.5, 7.5 Hz, 1H);  $^{13}\text{C}$  NMR (101 MHz,  $\text{CDCl}_3$ )  $\delta$  147.12 (td,  $J$  = 7.7, 3.9 Hz), 144.64 (ddd,  $J$  = 15.5, 7.7, 3.8 Hz), 142.31 – 141.76 (m), 139.77 – 139.25 (m), 138.91 (dd,  $J$  = 20.7, 9.0 Hz), 136.48 (dd,  $J$  = 20.6, 8.9 Hz), 109.96 (td,  $J$  = 15.0, 4.2 Hz), 59.00, 17.87 (d,  $J$  = 1.7 Hz), 17.26 (t,  $J$  = 3.2 Hz);  $^{19}\text{F}$  NMR (376 MHz,  $\text{CDCl}_3$ )  $\delta$  -143.09 (dd,  $J$  = 21.2, 7.4 Hz), -153.81 (d,  $J$  = 0.9 Hz), -153.86 (s), -153.92 (s), -161.17 – -161.60 (m); HRMS (ESI): Exact mass calcd for  $\text{C}_9\text{H}_4\text{F}_6\text{NO}_2$   $[\text{M}]^+$  253.0162, found 253.0160.

## Nitro reduction

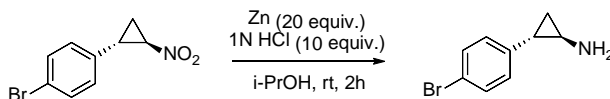

**trans-(4-bromophenyl)cyclopropan-1-amine (10).** To a vial equipped with a stir bar was added Zn powder (9.72 g, 149 mmol), aqueous 1N HCl solution (74.4 mL, 74.4 mmol), the nitrocyclopropane (7.44 mmol), and isopropyl alcohol (40 mL). The reaction mixture allowed to stir at room temperature for 2 h. The reaction was quenched by the addition of saturated  $\text{NaHCO}_3$  solution. The mixture was stirred vigorously for 20 min, and then filtered through Celite. The resulting solution was extracted with dichloromethane, dried over  $\text{Na}_2\text{SO}_4$ , filtered, and concentrated. Flash column chromatography of the residue ( $\text{SiO}_2$ , 50% ethyl acetate in hexanes) afforded the desired product as a colorless oil (850 mg, 54%).  $R_f$  = 0.32 (50% EtOAc/hexanes);  $^1\text{H}$  NMR (400 MHz,  $\text{CDCl}_3$ )  $\delta$  7.34 (d,  $J$  = 8.4 Hz, 2H), 6.88 (d,  $J$  = 8.4 Hz, 2H), 2.56 – 2.46 (m, 1H), 1.89 – 1.76 (m, 3H), 1.06 (dt,  $J$  = 9.5, 4.8 Hz, 1H), 0.93 (dd,  $J$  = 12.6, 5.6 Hz, 1H);  $^{13}\text{C}$  NMR (101 MHz,  $\text{CDCl}_3$ )  $\delta$  141.51, 131.21, 127.40, 118.92, 35.45, 25.96, 18.59.

## Amide coupling

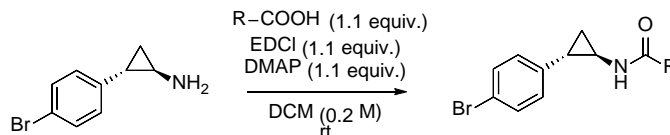

## General procedure for amide coupling

To a vial equipped with a stir bar was added 1-(3-Dimethylaminopropyl)-3-ethylcarbodiimide hydrochloride (21.1 mg, 110  $\mu$ mol), 4-(Dimethylamino)pyridine (13.4 mg, 110  $\mu$ mol), the carboxylic acid (110  $\mu$ mol), the aminocyclopropane (100  $\mu$ mol), and dichloromethane (0.50 mL). The reaction mixture allowed to stir at room temperature for 18 h. The reaction mixture was then diluted with water and extracted with dichloromethane, dried over  $\text{Na}_2\text{SO}_4$ , filtered, and concentrated in vacuo. Flash column chromatography of the residue ( $\text{SiO}_2$ , 0-10-20-50% ethyl acetate in hexanes) afforded the desired product as a white solid.

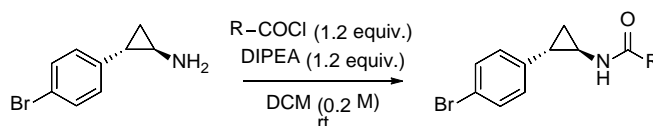

### General procedure for amide coupling

To a vial equipped with a stir bar was added *N,N*-Diisopropylethylamine (20.9  $\mu$ L, 120  $\mu$ mol), the acid chloride (120  $\mu$ mol), the aminocyclopropane (100  $\mu$ mol), and dichloromethane (0.50 mL). The reaction mixture allowed to stir at room temperature for 2 h. The reaction mixture was then diluted with dichloromethane, and concentrated in vacuo. Flash column chromatography of the residue (SiO<sub>2</sub>, 0-10-20-50% ethyl acetate in hexanes) afforded the desired product as a white solid.

### Sulfonamide synthesis

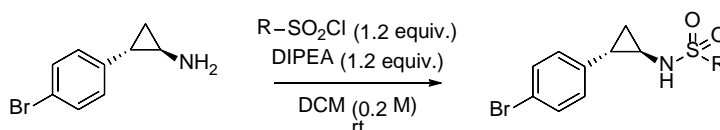

### General procedure for sulfonamide synthesis

To a vial equipped with a stir bar was added *N,N*-Diisopropylethylamine (20.9  $\mu$ L, 120  $\mu$ mol), the sulfonyl chloride (120  $\mu$ mol), the aminocyclopropane (100  $\mu$ mol), and dichloromethane (0.50 mL). The reaction mixture allowed to stir at room temperature for 2 h. The reaction mixture was then diluted with dichloromethane, and concentrated in vacuo. Flash column chromatography of the residue (SiO<sub>2</sub>, 0-10-20-50% ethyl acetate in hexanes) afforded the desired product as a white solid.

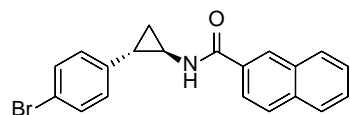

***trans*-N-(2-(4-bromophenyl)cyclopropyl)-2-naphthamideamine (11a).** To a vial equipped with a stir bar was added 1-(3-dimethylaminopropyl)-3-ethylcarbodiimide hydrochloride (21.1 mg, 110  $\mu$ mol), 4-(dimethylamino)pyridine (13.4 mg, 110  $\mu$ mol), 2-naphthoic acid (110  $\mu$ mol), *trans*-2-(4-bromophenyl)cyclopropan-1-amine (100  $\mu$ mol), and dichloromethane (0.50 mL). The reaction mixture allowed to stir at room temperature for 18 h. The reaction mixture was then diluted with water and extracted with dichloromethane, dried over Na<sub>2</sub>SO<sub>4</sub>, filtered, and concentrated in vacuo. Flash column chromatography of the residue (SiO<sub>2</sub>, 5-10-20-40% ethyl acetate in hexanes) afforded the desired product as a white solid (30.1 mg, 83%). *R<sub>f</sub>* = 0.32 (20% EtOAc/hexanes); <sup>1</sup>H NMR (400 MHz, CDCl<sub>3</sub>)  $\delta$  8.28 (s, 1H), 7.95 – 7.85 (m, 3H), 7.83 (dd, *J* = 8.6, 1.6 Hz, 1H), 7.62 – 7.51 (m, 2H), 7.42 (d, *J* = 8.4 Hz, 2H), 7.15 (d, *J* = 8.3 Hz, 2H), 6.53 (s, 1H), 3.08 (dt, *J* = 7.3, 3.2 Hz, 1H), 2.24 – 2.14 (m, 1H), 1.39 – 1.30 (m, 2H); <sup>13</sup>C NMR (101 MHz, CDCl<sub>3</sub>)  $\delta$  168.65, 139.42, 134.84, 132.61, 131.45, 131.28, 128.92, 128.64, 128.57, 127.79, 127.41, 126.86, 123.44, 119.98, 32.53, 24.79, 15.92; HRMS (ESI): Exact mass calcd for C<sub>20</sub>H<sub>16</sub>BrNO [M+H]<sup>+</sup> 365.0415, found 365.0418.

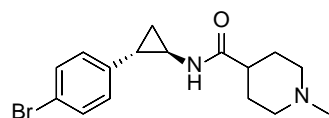

***trans*-N-(2-(4-bromophenyl)cyclopropyl)-1-methylpiperidine-4-carboxamide (11b).** To a vial equipped with a stir bar was added 1-(3-dimethylaminopropyl)-3-ethylcarbodiimide hydrochloride (21.1 mg, 110  $\mu$ mol), 4-(dimethylamino)pyridine (13.4 mg, 110  $\mu$ mol), 1-methylpiperidine-4-carboxylic acid (110  $\mu$ mol), *trans*-2-(4-bromophenyl)cyclopropan-1-amine (100  $\mu$ mol), and dichloromethane (0.50 mL). The reaction mixture allowed to stir at room temperature for 18 h. The reaction mixture was then diluted with water and extracted with dichloromethane, dried over Na<sub>2</sub>SO<sub>4</sub>, filtered, and concentrated in vacuo. Flash column chromatography of the residue (SiO<sub>2</sub>, 20-40-60% ethyl acetate in hexanes) afforded the desired product as a white solid (18.2 mg, 54%).

$R_f$  = 0.32 (50% EtOAc/hexanes);  $^1\text{H}$  NMR (400 MHz,  $\text{CDCl}_3$ )  $\delta$  7.38 (d,  $J$  = 8.4 Hz, 2H), 7.06 (d,  $J$  = 8.4 Hz, 2H), 5.71 (s, 1H), 2.93 – 2.85 (m, 2H), 2.82 (dt,  $J$  = 7.5, 3.3 Hz, 1H), 2.27 (s, 3H), 2.08 – 1.88 (m, 4H), 1.86 – 1.71 (m, 4H), 1.20 (dd,  $J$  = 13.6, 6.2 Hz, 1H), 1.15 – 1.07 (m, 1H).;  $^{13}\text{C}$  NMR (101 MHz,  $\text{CDCl}_3$ )  $\delta$  176.09, 139.46, 131.36, 128.56, 119.86, 55.18, 46.35, 42.57, 31.88, 28.96, 28.89, 24.59, 15.83.; HRMS (ESI): Exact mass calcd for  $\text{C}_{16}\text{H}_{21}\text{BrN}_2\text{O}$   $[\text{M}+\text{H}]^+$  336.0837, found 366.0835.

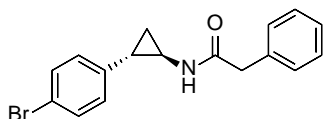

***trans*-N-(2-(4-bromophenyl)cyclopropyl)-2-phenylacetamide (11c).** To a vial equipped with a stir bar was added 1-(3-dimethylaminopropyl)-3-ethylcarbodiimide hydrochloride (21.1 mg, 110  $\mu\text{mol}$ ), 4-(dimethylamino)pyridine (13.4 mg, 110  $\mu\text{mol}$ ), the carboxylic acid (110  $\mu\text{mol}$ ), *trans*-2-(4-bromophenyl)cyclopropan-1-amine (100

$\mu\text{mol}$ ), and dichloromethane (0.50 mL). The reaction mixture allowed to stir at room temperature for 18 h. The reaction mixture was then diluted with water and extracted with dichloromethane, dried over  $\text{Na}_2\text{SO}_4$ , filtered, and concentrated in vacuo. Flash column chromatography of the residue ( $\text{SiO}_2$ , 5-10-20-40% ethyl acetate in hexanes) afforded the desired product as a white solid (24.3 mg, 73%).  $R_f$  = 0.35 (20% EtOAc/hexanes);  $^1\text{H}$  NMR (400 MHz,  $\text{CDCl}_3$ )  $\delta$  7.37 (dd,  $J$  = 7.7, 6.2 Hz, 3H), 7.32 (d,  $J$  = 7.1 Hz, 1H), 7.25 (d,  $J$  = 6.8 Hz, 2H), 7.02 (d,  $J$  = 8.4 Hz, 2H), 5.57 (s, 1H), 3.58 (s, 2H), 2.79 (td,  $J$  = 7.5, 3.3 Hz, 1H), 1.92 (ddd,  $J$  = 9.6, 6.3, 3.4 Hz, 1H), 1.15 (dt,  $J$  = 27.0, 13.4 Hz, 1H), 1.09 – 0.95 (m, 1H).;  $^{13}\text{C}$  NMR (101 MHz,  $\text{CDCl}_3$ )  $\delta$  172.13, 139.37, 134.70, 131.36, 129.41, 129.11, 128.48, 127.46, 119.88, 43.75, 32.07, 24.44, 15.84.; HRMS (ESI): Exact mass calcd for  $\text{C}_{17}\text{H}_{16}\text{BrNO}$   $[\text{M}+\text{H}]^+$  329.0415, found 329.0417.

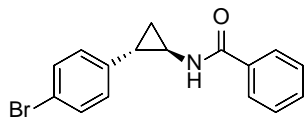

***trans*-N-(2-(4-bromophenyl)cyclopropyl)-2-naphthamideamine (11d).** To a vial equipped with a stir bar was added 1-(3-dimethylaminopropyl)-3-ethylcarbodiimide hydrochloride (21.1 mg, 110  $\mu\text{mol}$ ), 4-(dimethylamino)pyridine (13.4 mg, 110  $\mu\text{mol}$ ), 2-phenylacetic acid (110  $\mu\text{mol}$ ), *trans*-2-(4-bromophenyl)cyclopropan-1-amine (100

$\mu\text{mol}$ ), and dichloromethane (0.50 mL). The reaction mixture allowed to stir at room temperature for 18 h. The reaction mixture was then diluted with water and extracted with dichloromethane, dried over  $\text{Na}_2\text{SO}_4$ , filtered, and concentrated in vacuo. Flash column chromatography of the residue ( $\text{SiO}_2$ , 5-10-20-40% ethyl acetate in hexanes) afforded the desired product as a white solid (25.5 mg, 80%).  $R_f$  = 0.34 (20% EtOAc/hexanes);  $^1\text{H}$  NMR (400 MHz,  $\text{CDCl}_3$ )  $\delta$  7.77 (d,  $J$  = 7.2 Hz, 2H), 7.52 (t,  $J$  = 7.3 Hz, 1H), 7.43 (dd,  $J$  = 15.3, 8.1 Hz, 4H), 7.12 (d,  $J$  = 8.3 Hz, 2H), 6.37 (s, 1H), 3.02 (td,  $J$  = 7.5, 3.3 Hz, 1H), 2.14 (ddd,  $J$  = 9.6, 6.5, 3.4 Hz, 1H), 1.30 (ddt,  $J$  = 13.0, 8.4, 4.2 Hz, 2H).;  $^{13}\text{C}$  NMR (101 MHz,  $\text{CDCl}_3$ )  $\delta$  168.61, 139.42, 134.09, 131.70, 131.42, 128.63, 128.59, 126.87, 119.94, 32.41, 24.70, 15.88.; HRMS (ESI): Exact mass calcd for  $\text{C}_{20}\text{H}_{16}\text{BrNO}$   $[\text{M}+\text{H}]^+$  365.0415, found 365.0418.

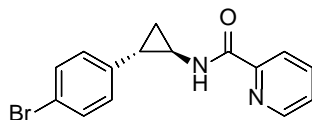

***trans*-N-(2-(4-bromophenyl)cyclopropyl)picolinamide (11e).** To a vial equipped with a stir bar was added 1-(3-dimethylaminopropyl)-3-ethylcarbodiimide hydrochloride (21.1 mg, 110  $\mu\text{mol}$ ), 4-(dimethylamino)pyridine (13.4 mg, 110  $\mu\text{mol}$ ), picolinic acid (110  $\mu\text{mol}$ ), *trans*-2-(4-bromophenyl)cyclopropan-1-amine (100  $\mu\text{mol}$ ), and dichloromethane (0.50 mL). The reaction mixture allowed to stir at room temperature for 18 h. The reaction mixture was then diluted with water and extracted with dichloromethane, dried over  $\text{Na}_2\text{SO}_4$ , filtered, and concentrated in vacuo. Flash column chromatography of the residue ( $\text{SiO}_2$ , 0-2-10% MeOH in DCM) afforded the desired product as a white solid (22.1 mg, 70%).  $R_f$  = 0.32 (5% MeOH/DCM);  $^1\text{H}$  NMR (400 MHz,  $\text{CDCl}_3$ )  $\delta$  8.54 (d,  $J$  = 4.7 Hz, 1H), 8.21 (d,  $J$  = 7.8 Hz, 2H), 7.86 (td,  $J$  = 7.7, 1.7 Hz, 1H), 7.48 – 7.43 (m, 1H), 7.42 – 7.37 (m, 2H), 7.11 (d,  $J$  = 8.4 Hz, 2H), 3.11 – 3.02 (m, 1H), 2.23 – 2.12 (m, 1H), 1.38 – 1.31 (m, 2H).;  $^{13}\text{C}$  NMR (101 MHz,  $\text{CDCl}_3$ )  $\delta$  165.49, 149.64, 148.05, 139.60, 137.47, 131.42, 128.52, 126.36, 122.09, 119.86, 31.95, 24.45, 15.75.; HRMS (ESI): Exact mass calcd for  $\text{C}_{15}\text{H}_{13}\text{BrN}_2\text{O}$   $[\text{M}+\text{H}]^+$  316.0211, found 316.0209.

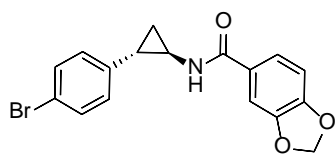

***trans*-N-(2-(4-bromophenyl)cyclopropyl)benzo[d][1,3]dioxole-5-carboxamide (11f).** To a vial equipped with a stir bar was added 1-(3-dimethylaminopropyl)-3-ethylcarbodiimide hydrochloride (21.1 mg, 110  $\mu$ mol), 4-(dimethylamino)pyridine (13.4 mg, 110  $\mu$ mol), benzo[d][1,3]dioxole-5-carboxylic acid (110  $\mu$ mol), *trans*-2-(4-bromophenyl)cyclopropan-1-amine (100  $\mu$ mol), and dichloromethane (0.50 mL).

The reaction mixture allowed to stir at room temperature for 18 h. The reaction mixture was then diluted with water and extracted with dichloromethane, dried over  $\text{Na}_2\text{SO}_4$ , filtered, and concentrated in vacuo. Flash column chromatography of the residue ( $\text{SiO}_2$ , 5-10-20-40% ethyl acetate in hexanes) afforded the desired product as a white solid (28.4 mg, 79%).  $R_f$  = 0.32 (20% EtOAc/hexanes);  $^1\text{H}$  NMR (400 MHz,  $\text{CDCl}_3$ )  $\delta$  7.40 (d,  $J$  = 8.4 Hz, 2H), 7.28 (dd,  $J$  = 8.8, 1.8 Hz, 2H), 7.11 (d,  $J$  = 8.3 Hz, 2H), 6.82 (d,  $J$  = 8.7 Hz, 1H), 6.25 (s, 1H), 6.03 (s, 2H), 3.02 – 2.94 (m, 1H), 2.11 (ddd,  $J$  = 9.6, 6.3, 3.5 Hz, 1H), 1.34 – 1.21 (m, 2H).;  $^{13}\text{C}$  NMR (101 MHz,  $\text{CDCl}_3$ )  $\delta$  167.86, 150.52, 148.07, 139.44, 131.42, 128.59, 128.32, 121.48, 119.94, 108.01, 107.56, 101.74, 32.45, 24.72, 15.89.; HRMS (ESI): Exact mass calcd for  $\text{C}_{17}\text{H}_{14}\text{BrNO}_3$   $[\text{M}+\text{H}]^+$  359.0157, found 359.0159.

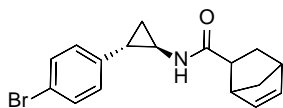

***trans*-N-(2-(4-bromophenyl)cyclopropyl)bicyclo[2.2.1]hept-5-ene-2-carboxamide (11g).** To a vial equipped with a stir bar was added 1-(3-dimethylaminopropyl)-3-ethylcarbodiimide hydrochloride (21.1 mg, 110  $\mu$ mol), 4-(dimethylamino)pyridine (13.4 mg, 110  $\mu$ mol), bicyclo[2.2.1]hept-5-ene-2-carboxylic acid (110  $\mu$ mol), *trans*-2-(4-bromophenyl)cyclopropan-1-amine (100  $\mu$ mol), and dichloromethane (0.50 mL). The reaction mixture allowed to stir at room temperature for 18 h. The reaction mixture was then diluted with water and extracted with dichloromethane, dried over  $\text{Na}_2\text{SO}_4$ , filtered, and concentrated in vacuo. Flash column chromatography of the residue ( $\text{SiO}_2$ , 5-10-20-40% ethyl acetate in hexanes) afforded the desired product as a white solid (17.5 mg, 52%).  $R_f$  = 0.38 (20% EtOAc/hexanes);  $^1\text{H}$  NMR (400 MHz,  $\text{CDCl}_3$ )  $\delta$  7.37 (dd,  $J$  = 8.3, 1.0 Hz, 2H), 7.06 (d,  $J$  = 8.4 Hz, 2H), 6.25 (dd,  $J$  = 5.6, 3.1 Hz, 1H), 5.98 (td,  $J$  = 6.1, 2.8 Hz, 1H), 5.63 (s, 1H), 3.12 (s, 1H), 2.93 (s, 1H), 2.85 (td,  $J$  = 9.1, 4.5 Hz, 1H), 2.77 – 2.70 (m, 1H), 1.99 – 1.87 (m, 2H), 1.46 (d,  $J$  = 8.2 Hz, 1H), 1.42 – 1.32 (m, 1H), 1.32 – 1.24 (m, 12H), 1.17 (ddd,  $J$  = 13.6, 6.2, 3.3 Hz, 1H), 1.14 – 1.06 (m, 1H).;  $^{13}\text{C}$  NMR (101 MHz,  $\text{CDCl}_3$ )  $\delta$  175.45, 139.56, 137.91, 132.08, 131.32, 128.65, 119.82, 50.06, 46.25, 44.73, 42.74, 31.87, 29.84, 24.68, 15.81.; HRMS (ESI): Exact mass calcd for  $\text{C}_{17}\text{H}_{18}\text{BrNO}$   $[\text{M}+\text{H}]^+$  331.0572, found 331.0573.

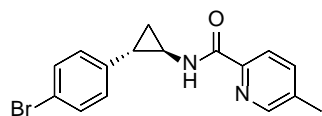

***trans*-N-(2-(4-bromophenyl)cyclopropyl)-5-methylpicolinamide (11h).** To a vial equipped with a stir bar was added 1-(3-dimethylaminopropyl)-3-ethylcarbodiimide hydrochloride (21.1 mg, 110  $\mu$ mol), 4-(dimethylamino)pyridine (13.4 mg, 110  $\mu$ mol), 5-methylpicolinic acid (110  $\mu$ mol), *trans*-2-(4-bromophenyl)cyclopropan-1-amine (100  $\mu$ mol), and dichloromethane (0.50 mL). The reaction mixture allowed to stir at

room temperature for 18 h. The reaction mixture was then diluted with water and extracted with dichloromethane, dried over  $\text{Na}_2\text{SO}_4$ , filtered, and concentrated in vacuo. Flash column chromatography of the residue ( $\text{SiO}_2$ , 0-2-10% MeOH in DCM) afforded the desired product as a white solid (20.1 mg, 61%).  $R_f$  = 0.28 (5% MeOH/DCM);  $^1\text{H}$  NMR (400 MHz,  $\text{CDCl}_3$ )  $\delta$  8.35 (dd,  $J$  = 1.3, 0.6 Hz, 1H), 8.14 (s, 1H), 8.09 (d,  $J$  = 8.0 Hz, 1H), 7.65 (dd,  $J$  = 8.0, 1.4 Hz, 1H), 7.47 – 7.35 (m, 2H), 7.11 (d,  $J$  = 8.4 Hz, 2H), 3.05 (ddt,  $J$  = 7.2, 5.1, 3.6 Hz, 1H), 2.40 (s, 3H), 2.20 – 2.11 (m, 1H), 1.37 – 1.27 (m, 2H).;  $^{13}\text{C}$  NMR (101 MHz,  $\text{CDCl}_3$ )  $\delta$  165.70, 148.52, 147.24, 139.67, 137.79, 136.58, 131.40, 128.52, 121.71, 119.82, 31.94, 24.43, 18.56, 15.76.; HRMS (ESI): Exact mass calcd for  $\text{C}_{16}\text{H}_{15}\text{BrN}_2\text{O}$   $[\text{M}+\text{H}]^+$  330.0368, found 330.0370.

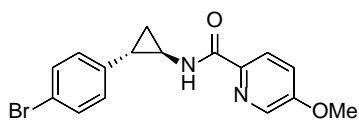

***trans*-N-(2-(4-bromophenyl)cyclopropyl)-5-methoxypicolinamide (11i).** To a vial equipped with a stir bar was added 1-(3-dimethylaminopropyl)-3-ethylcarbodiimide hydrochloride (21.1 mg, 110  $\mu$ mol), 4-(dimethylamino)pyridine (13.4 mg, 110  $\mu$ mol), 5-methoxypicolinic acid (110  $\mu$ mol), *trans*-2-(4-bromophenyl)cyclopropan-1-amine (100  $\mu$ mol), and dichloromethane (0.50 mL). The reaction mixture allowed to stir at room temperature for 18 h. The reaction mixture was then diluted with water and extracted with dichloromethane, dried over Na<sub>2</sub>SO<sub>4</sub>, filtered, and concentrated in vacuo. Flash column chromatography of the residue (SiO<sub>2</sub>, 0-2-10% MeOH in DCM) afforded the desired product as a white solid (13.2 mg, 38%). *R*<sub>f</sub> = 0.33 (5% MeOH/DCM); <sup>1</sup>H NMR (400 MHz, CDCl<sub>3</sub>)  $\delta$  8.19 (d, *J* = 2.7 Hz, 1H), 8.16 (d, *J* = 8.7 Hz, 1H), 8.02 (s, 1H), 7.44 – 7.38 (m, 2H), 7.29 (dd, *J* = 8.7, 2.9 Hz, 1H), 7.11 (d, *J* = 8.4 Hz, 2H), 3.91 (s, 3H), 3.04 (ddt, *J* = 7.0, 5.4, 3.6 Hz, 1H), 2.21 – 2.08 (m, 1H), 1.36 – 1.27 (m, 2H).; <sup>13</sup>C NMR (101 MHz, CDCl<sub>3</sub>)  $\delta$  165.45, 158.01, 142.38, 139.71, 136.52, 131.40, 128.53, 123.26, 120.14, 119.81, 55.77, 31.95, 24.45, 15.77.; HRMS (ESI): Exact mass calcd for C<sub>16</sub>H<sub>15</sub>BrN<sub>2</sub>O<sub>2</sub> [M+H]<sup>+</sup> 346.0317, found 346.0314.

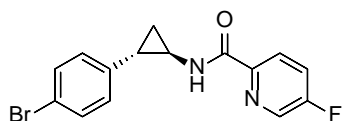

***trans*-N-(2-(4-bromophenyl)cyclopropyl)-5-fluoropicolinamide (11j).** To a vial equipped with a stir bar was added 1-(3-dimethylaminopropyl)-3-ethylcarbodiimide hydrochloride (21.1 mg, 110  $\mu$ mol), 4-(dimethylamino)pyridine (13.4 mg, 110  $\mu$ mol), 5-fluoropicolinic acid (110  $\mu$ mol), *trans*-2-(4-bromophenyl)cyclopropan-1-amine (100  $\mu$ mol), and dichloromethane (0.50 mL). The reaction mixture allowed to stir at room temperature for 18 h. The reaction mixture was then diluted with water and extracted with dichloromethane, dried over Na<sub>2</sub>SO<sub>4</sub>, filtered, and concentrated in vacuo. Flash column chromatography of the residue (SiO<sub>2</sub>, 0-2-10% MeOH in DCM) afforded the desired product as a white solid (20.5 mg, 60%). *R*<sub>f</sub> = 0.30 (5% MeOH/DCM); <sup>1</sup>H NMR (400 MHz, CDCl<sub>3</sub>)  $\delta$  8.37 (d, *J* = 2.7 Hz, 1H), 8.25 (dd, *J* = 8.7, 4.6 Hz, 1H), 8.03 (s, 1H), 7.54 (td, *J* = 8.4, 2.8 Hz, 1H), 7.41 (d, *J* = 8.3 Hz, 2H), 7.11 (d, *J* = 8.4 Hz, 2H), 3.08 – 3.01 (m, 1H), 2.16 (td, *J* = 8.0, 3.4 Hz, 1H), 1.35 – 1.30 (m, 2H).; <sup>13</sup>C NMR (101 MHz, CDCl<sub>3</sub>)  $\delta$  164.48, 161.27, 146.08, 139.48, 136.60, 131.44, 128.50, 124.00, 123.88, 119.91, 31.96, 24.46, 15.74.; <sup>19</sup>F NMR (376 MHz, CDCl<sub>3</sub>)  $\delta$  -122.01 (dd, *J* = 8.1, 4.7 Hz).; HRMS (ESI): Exact mass calcd for C<sub>15</sub>H<sub>12</sub>BrFN<sub>2</sub>O [M+H]<sup>+</sup> 334.0117, found 334.0121.

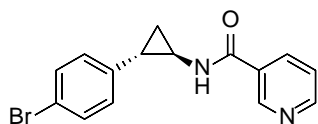

***trans*-N-(2-(4-bromophenyl)cyclopropyl)nicotinamid (11k).** To a vial equipped with a stir bar was added 1-(3-dimethylaminopropyl)-3-ethylcarbodiimide hydrochloride (21.1 mg, 110  $\mu$ mol), 4-(dimethylamino)pyridine (13.4 mg, 110  $\mu$ mol), nicotinic acid (110  $\mu$ mol), *trans*-2-(4-bromophenyl)cyclopropan-1-amine (100  $\mu$ mol), and dichloromethane (0.50 mL). The reaction mixture allowed to stir at room temperature for 18 h. The reaction mixture was then diluted with water and extracted with dichloromethane, dried over Na<sub>2</sub>SO<sub>4</sub>, filtered, and concentrated in vacuo. Flash column chromatography of the residue (SiO<sub>2</sub>, 0-2-10% MeOH in DCM) afforded the desired product as a white solid (20.2 mg, 64%). *R*<sub>f</sub> = 0.25 (5% MeOH/DCM); <sup>1</sup>H NMR (400 MHz, CDCl<sub>3</sub>)  $\delta$  8.95 (s, 1H), 8.74 (d, *J* = 4.6 Hz, 1H), 8.13 (d, *J* = 7.9 Hz, 1H), 7.47 – 7.34 (m, 3H), 7.12 (d, *J* = 7.9 Hz, 2H), 6.43 (s, 1H), 3.08 – 2.96 (m, 1H), 2.23 – 2.09 (m, 1H), 1.41 – 1.26 (m, 2H).; <sup>13</sup>C NMR (101 MHz, CDCl<sub>3</sub>)  $\delta$  166.72, 152.52, 147.71, 139.09, 135.13, 131.50, 129.79, 128.58, 123.61, 120.11, 32.38, 24.75, 15.80.; HRMS (ESI): Exact mass calcd for C<sub>15</sub>H<sub>13</sub>BrN<sub>2</sub>O [M+H]<sup>+</sup> 316.0211, found 316.0208.

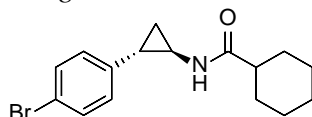

***trans*-N-(2-(4-bromophenyl)cyclopropyl)cyclohexanecarboxamide (11l).** To a vial equipped with a stir bar was added *N,N*-diisopropylethylamine (20.9  $\mu$ L, 120  $\mu$ mol), cyclohexanecarbonyl chloride (120  $\mu$ mol), *trans*-2-(4-bromophenyl)cyclopropan-1-amine (100  $\mu$ mol), and dichloromethane (0.50 mL). The reaction mixture allowed to stir at room temperature for 2 h. The reaction mixture was then diluted with dichloromethane and concentrated in vacuo. Flash column chromatography of the residue (SiO<sub>2</sub>, 5-10-20-40% ethyl acetate in hexanes) afforded the desired product as a white solid (10.1 mg, 31%). *R<sub>f</sub>* = 0.38 (20% EtOAc/hexanes); <sup>1</sup>H NMR (400 MHz, CDCl<sub>3</sub>)  $\delta$  7.37 (d, *J* = 8.4 Hz, 2H), 7.07 (d, *J* = 8.3 Hz, 2H), 5.66 (s, 1H), 2.80 (dt, *J* = 7.5, 3.3 Hz, 1H), 2.10 – 1.93 (m, 2H), 1.88 – 1.75 (m, 4H), 1.70 – 1.62 (m, 1H), 1.43 (dd, *J* = 23.8, 11.9 Hz, 2H), 1.36 – 1.04 (m, 5H).; <sup>13</sup>C NMR (101 MHz, CDCl<sub>3</sub>)  $\delta$  177.26, 139.54, 131.35, 128.64, 119.85, 49.23, 45.28, 31.83, 29.62, 25.71, 24.64, 15.79.; HRMS (ESI): Exact mass calcd for C<sub>16</sub>H<sub>20</sub>BrNO [*M*+*H*]<sup>+</sup> 321.0728, found 321.0725.

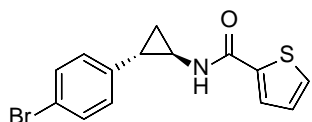

***trans*-N-(2-(4-bromophenyl)cyclopropyl)thiophene-2-carboxamide (11m).** To a vial equipped with a stir bar was added *N,N*-diisopropylethylamine (20.9  $\mu$ L, 120  $\mu$ mol), thiophene-2-carbonyl chloride (120  $\mu$ mol), (1*R*,2*S*)-2-(4-bromophenyl)cyclopropan-1-amine (100  $\mu$ mol), and dichloromethane (0.50 mL). The reaction mixture allowed to stir at room temperature for 2 h. The reaction mixture was then diluted with dichloromethane and concentrated in vacuo. Flash column chromatography of the residue (SiO<sub>2</sub>, 5-10-20-40% ethyl acetate in hexanes) afforded the desired product as a white solid (19.3 mg, 60%). *R<sub>f</sub>* = 0.35 (20% EtOAc/hexanes); <sup>1</sup>H NMR (400 MHz, CDCl<sub>3</sub>)  $\delta$  7.52 – 7.46 (m, 2H), 7.40 (d, *J* = 8.4 Hz, 2H), 7.12 (d, *J* = 8.2 Hz, 2H), 7.10 – 7.06 (m, 1H), 6.21 (s, 1H), 3.05 – 2.83 (m, 1H), 2.29 – 2.05 (m, 1H), 1.34 – 1.19 (m, 2H).; <sup>13</sup>C NMR (101 MHz, CDCl<sub>3</sub>)  $\delta$  163.00, 139.25, 138.42, 131.43, 130.17, 128.71, 128.32, 127.70, 120.02, 32.25, 24.80, 15.71.; HRMS (ESI): Exact mass calcd for C<sub>14</sub>H<sub>12</sub>BrNOS [*M*+*H*]<sup>+</sup> 320.9823, found 320.9824.

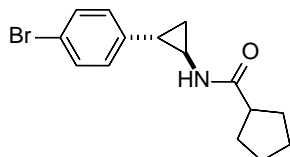

***trans*-N-(2-(4-bromophenyl)cyclopropyl)cyclopentanecarboxamide (11n).** To a vial equipped with a stir bar was added *N,N*-diisopropylethylamine (20.9  $\mu$ L, 120  $\mu$ mol), cyclopentanecarbonyl chloride (120  $\mu$ mol), *trans*-2-(4-bromophenyl)cyclopropan-1-amine (100  $\mu$ mol), and dichloromethane (0.50 mL). The reaction mixture allowed to stir at room temperature for 2 h. The reaction mixture was then diluted with dichloromethane and concentrated in vacuo. Flash column chromatography of the residue (SiO<sub>2</sub>, 5-10-20-40% ethyl acetate in hexanes) afforded the desired product as a white solid (24.3 mg, 83%). *R<sub>f</sub>* = 0.32 (20% EtOAc/hexanes); <sup>1</sup>H NMR (400 MHz, CDCl<sub>3</sub>)  $\delta$  7.37 (d, *J* = 8.4 Hz, 2H), 7.08 (d, *J* = 8.4 Hz, 2H), 5.68 (s, 1H), 2.81 (ddd, *J* = 10.7, 4.4, 3.2 Hz, 1H), 2.58 – 2.38 (m, 1H), 1.99 (ddd, *J* = 9.7, 6.3, 3.4 Hz, 1H), 1.91 – 1.67 (m, 6H), 1.61 – 1.57 (m, 2H), 1.19 (dd, *J* = 13.6, 6.2 Hz, 1H), 1.16 – 1.07 (m, 1H).; <sup>13</sup>C NMR (101 MHz, CDCl<sub>3</sub>)  $\delta$  177.47, 139.58, 131.34, 128.66, 119.83, 45.56, 31.97, 30.39, 25.97, 24.64, 15.73.; HRMS (ESI): Exact mass calcd for C<sub>15</sub>H<sub>18</sub>BrNO [*M*+*H*]<sup>+</sup> 307.0572, found 307.0572.

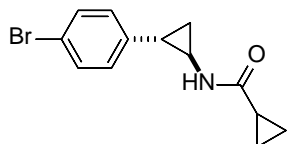

***trans*-N-(2-(4-bromophenyl)cyclopropyl)cyclopropanecarboxamide (11o).** To a vial equipped with a stir bar was added *N,N*-diisopropylethylamine (20.9  $\mu$ L, 120  $\mu$ mol), cyclopropanecarbonyl chloride (120  $\mu$ mol), *trans*-2-(4-bromophenyl)cyclopropan-1-amine (100  $\mu$ mol), and dichloromethane (0.50 mL). The reaction mixture allowed to stir at room temperature for 2 h. The reaction mixture was then diluted with dichloromethane and concentrated in vacuo. Flash column chromatography of the residue (SiO<sub>2</sub>, 5-10-20-40% ethyl acetate in hexanes) afforded the desired product as a white solid (19.0 mg, 72%). *R<sub>f</sub>* = 0.38 (20% EtOAc/hexanes); <sup>1</sup>H NMR (400 MHz, CDCl<sub>3</sub>)  $\delta$  7.37 (d, *J* = 8.4 Hz, 2H), 7.07 (d, *J* = 8.4 Hz, 2H), 5.87 (s, 1H), 2.84 – 2.77 (m, 1H), 2.03 (ddd, *J* = 9.6, 6.5, 3.4 Hz, 1H), 1.30 (ddd, *J* = 12.5, 7.9, 4.5 Hz, 1H), 1.24 – 1.11 (m, 2H), 1.04 – 0.94 (m, 2H), 0.75 (dd, *J* = 7.7, 3.4 Hz, 2H).; <sup>13</sup>C NMR (101 MHz, CDCl<sub>3</sub>)  $\delta$  174.70, 139.55, 131.35, 128.64, 119.84, 32.08,

24.61, 15.68, 14.54, 7.40, 7.31; HRMS (ESI): Exact mass calcd for  $C_{13}H_{14}BrNO$   $[M+H]^+$  279.0259, found 279.0260.

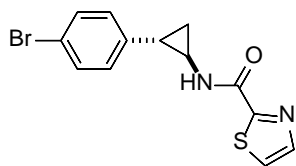

***trans*-N-(2-(4-bromophenyl)cyclopropyl)thiazole-2-carboxamide (11p).** To a vial equipped with a stir bar was added *N,N*-diisopropylethylamine (20.9  $\mu$ L, 120  $\mu$ mol), thiazole-2-carbonyl chloride (120  $\mu$ mol), *trans*-2-(4-bromophenyl)cyclopropan-1-amine (100  $\mu$ mol), and dichloromethane (0.50 mL). The reaction mixture allowed to stir at room temperature for 2 h. The reaction mixture was then diluted with dichloromethane and concentrated in vacuo. Flash column chromatography of the residue ( $SiO_2$ , 20-40-70% ethyl acetate in hexanes) afforded the desired product as a white solid (15.3 mg, 50%).  $R_f$  = 0.32 (50% EtOAc/hexanes);  $^1H$  NMR (400 MHz,  $CDCl_3$ )  $\delta$  7.85 (d,  $J$  = 3.1 Hz, 1H), 7.59 (d,  $J$  = 3.1 Hz, 1H), 7.47 (s, 1H), 7.41 (d,  $J$  = 8.4 Hz, 2H), 7.11 (d,  $J$  = 8.4 Hz, 2H), 3.01 (ddd,  $J$  = 12.2, 5.8, 3.4 Hz, 1H), 2.20 (td,  $J$  = 8.2, 3.5 Hz, 1H), 1.34 (dd,  $J$  = 8.4, 5.7 Hz, 2H).;  $^{13}C$  NMR (101 MHz,  $CDCl_3$ )  $\delta$  163.53, 160.56, 143.49, 139.12, 131.47, 128.62, 124.83, 120.06, 31.85, 24.56, 15.53.; HRMS (ESI): Exact mass calcd for  $C_{13}H_{11}BrN_2OS$   $[M+H]^+$  321.9775, found 321.9778.

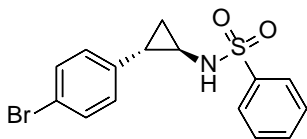

***trans*-N-(2-(4-bromophenyl)cyclopropyl)benzenesulfonamide (12a).** To a vial equipped with a stir bar was added *N,N*-diisopropylethylamine (20.9  $\mu$ L, 120  $\mu$ mol), benzenesulfonyl chloride (120  $\mu$ mol), *trans*-2-(4-bromophenyl)cyclopropan-1-amine (100  $\mu$ mol), and dichloromethane (0.50 mL). The reaction mixture allowed to stir at room temperature for 2 h. The reaction mixture was then diluted with dichloromethane and concentrated in vacuo. Flash column chromatography of the residue ( $SiO_2$ , 5-10-20-40% ethyl acetate in hexanes) afforded the desired product as a white solid (14.5 mg, 41%).  $R_f$  = 0.32 (20% EtOAc/hexanes);  $^1H$  NMR (400 MHz,  $CDCl_3$ )  $\delta$  7.84 (d,  $J$  = 7.4 Hz, 2H), 7.60 (t,  $J$  = 7.3 Hz, 1H), 7.50 (t,  $J$  = 7.7 Hz, 2H), 7.36 (d,  $J$  = 8.4 Hz, 2H), 6.86 (d,  $J$  = 8.4 Hz, 2H), 4.92 (s, 1H), 2.39 – 2.31 (m, 1H), 2.18 – 2.06 (m, 1H), 1.33 – 1.23 (m, 1H), 1.10 (dd,  $J$  = 13.1, 6.6 Hz, 1H).;  $^{13}C$  NMR (101 MHz,  $CDCl_3$ )  $\delta$  139.34, 138.64, 132.99, 131.46, 129.17, 127.99, 127.42, 120.07, 33.75, 24.13, 15.20.; HRMS (ESI): Exact mass calcd for  $C_{15}H_{14}BrNO_2S$   $[M+H]^+$  350.9929, found 350.9932.

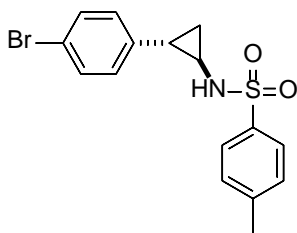

***trans*-N-(2-(4-bromophenyl)cyclopropyl)-4-methylbenzenesulfonamide (12b).** To a vial equipped with a stir bar was added *N,N*-diisopropylethylamine (20.9  $\mu$ L, 120  $\mu$ mol), 4-methylbenzenesulfonyl chloride (120  $\mu$ mol), *trans*-2-(4-bromophenyl)cyclopropan-1-amine (100  $\mu$ mol), and dichloromethane (0.50 mL). The reaction mixture allowed to stir at room temperature for 2 h. The reaction mixture was then diluted with dichloromethane and concentrated in vacuo. Flash column chromatography of the residue ( $SiO_2$ , 5-10-20-40% ethyl acetate in hexanes) afforded the desired product as a white solid (30.1 mg, 87%).  $R_f$  = 0.32 (20% EtOAc/hexanes);  $^1H$  NMR (400 MHz,  $CDCl_3$ )  $\delta$  7.71 (d,  $J$  = 8.3 Hz, 2H), 7.36 (d,  $J$  = 8.4 Hz, 2H), 7.28 (d,  $J$  = 8.0 Hz, 2H), 6.87 (d,  $J$  = 8.4 Hz, 2H), 4.90 (s, 1H), 2.43 (s, 3H), 2.33 (ddd,  $J$  = 7.2, 4.1, 1.2 Hz, 1H), 2.12 (ddd,  $J$  = 9.6, 6.5, 3.0 Hz, 1H), 1.27 (ddd,  $J$  = 9.9, 5.9, 4.1 Hz, 1H), 1.08 (dd,  $J$  = 13.4, 6.4 Hz, 1H).;  $^{13}C$  NMR (101 MHz,  $CDCl_3$ )  $\delta$  143.83, 138.79, 136.38, 131.41, 129.76, 128.03, 127.46, 119.99, 33.77, 24.04, 21.56, 15.14.; HRMS (ESI): Exact mass calcd for  $C_{16}H_{16}BrNO_2S$   $[M+H]^+$  365.0085, found 365.0082.

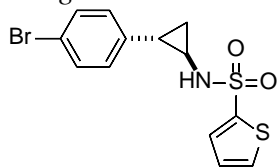

***trans*-N-(2-(4-bromophenyl)cyclopropyl)thiophene-2-sulfonamide (12c).** To a vial equipped with a stir bar was added *N,N*-diisopropylethylamine (20.9  $\mu$ L, 120  $\mu$ mol), thiophene-2-sulfonyl chloride (120  $\mu$ mol), *trans*-2-(4-bromophenyl)cyclopropan-1-amine (100  $\mu$ mol), and dichloromethane (0.50 mL). The reaction mixture allowed to stir at room temperature for 2 h. The reaction mixture was then diluted with dichloromethane and concentrated in vacuo. Flash column chromatography of the residue (SiO<sub>2</sub>, 5-10-20-40% ethyl acetate in hexanes) afforded the desired product as a white solid (9.0 mg, 27%).  $R_f$  = 0.32 (20% EtOAc/hexanes); <sup>1</sup>H NMR (400 MHz, CDCl<sub>3</sub>)  $\delta$  7.59 (ddd,  $J$  = 5.1, 4.4, 1.3 Hz, 2H), 7.43 – 7.31 (m, 2H), 7.08 (dd,  $J$  = 5.0, 3.8 Hz, 1H), 6.92 (d,  $J$  = 8.4 Hz, 2H), 5.03 (s, 1H), 2.48 – 2.38 (m, 1H), 2.23 (ddd,  $J$  = 9.7, 6.6, 3.0 Hz, 1H), 1.35 – 1.29 (m, 1H), 1.15 (dd,  $J$  = 13.4, 6.5 Hz, 2H).; <sup>13</sup>C NMR (101 MHz, CDCl<sub>3</sub>)  $\delta$  140.17, 138.58, 132.88, 132.42, 131.48, 128.16, 127.51, 120.15, 33.86, 24.06, 14.94.; HRMS (ESI): Exact mass calcd for C<sub>13</sub>H<sub>12</sub>BrNO<sub>2</sub>S<sub>2</sub> [M+H]<sup>+</sup> 356.9493, found 356.9491.

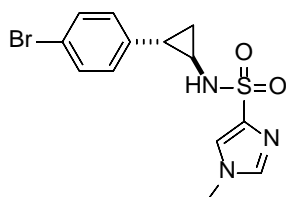

***trans*-N-(2-(4-bromophenyl)cyclopropyl)-1-methyl-1H-imidazole-4-sulfonamide (12d).** To a vial equipped with a stir bar was added *N,N*-diisopropylethylamine (20.9  $\mu$ L, 120  $\mu$ mol), 1-methyl-1H-imidazole-4-sulfonyl chloride (120  $\mu$ mol), *trans*-2-(4-bromophenyl)cyclopropan-1-amine (100  $\mu$ mol), and dichloromethane (0.50 mL). The reaction mixture allowed to stir at room temperature for 2 h. The reaction mixture was then diluted with dichloromethane and concentrated in vacuo. Flash column chromatography of the residue (SiO<sub>2</sub>, 0-2-10% MeOH in DCM) afforded the desired product as a white solid (21.3 mg, 63%).  $R_f$  = 0.18 (5% MeOH/DCM); <sup>1</sup>H NMR (400 MHz, CDCl<sub>3</sub>)  $\delta$  7.51 (d,  $J$  = 1.1 Hz, 1H), 7.42 (d,  $J$  = 1.4 Hz, 1H), 7.38 – 7.32 (m, 2H), 6.88 (d,  $J$  = 8.4 Hz, 2H), 5.57 (s, 1H), 3.71 (s, 3H), 2.49 – 2.33 (m, 1H), 2.19 (ddd,  $J$  = 9.6, 6.5, 3.0 Hz, 1H), 1.34 (ddd,  $J$  = 9.9, 5.9, 4.1 Hz, 1H), 1.09 (dd,  $J$  = 13.6, 6.3 Hz, 1H). <sup>13</sup>C NMR (101 MHz, CDCl<sub>3</sub>)  $\delta$  139.76, 139.27, 139.13, 131.33, 128.13, 124.75, 119.82, 34.01, 33.90, 23.84, 14.93.; HRMS (ESI): Exact mass calcd for C<sub>13</sub>H<sub>14</sub>BrN<sub>3</sub>O<sub>2</sub>S [M+H]<sup>+</sup> 354.9990, found 354.9986.

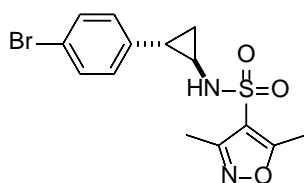

***trans*-N-(2-(4-bromophenyl)cyclopropyl)-3,5-dimethylisoxazole-4-sulfonamide (12e).** To a vial equipped with a stir bar was added *N,N*-diisopropylethylamine (20.9  $\mu$ L, 120  $\mu$ mol), 3,5-dimethylisoxazole-4-sulfonyl chloride (120  $\mu$ mol), *trans*-2-(4-bromophenyl)cyclopropan-1-amine (100  $\mu$ mol), and dichloromethane (0.50 mL). The reaction mixture allowed to stir at room temperature for 2 h. The reaction mixture was then diluted with dichloromethane and concentrated in vacuo. Flash column chromatography of the residue (SiO<sub>2</sub>, 20-50-70% ethyl acetate in hexanes) afforded the desired product as a white solid (32.4 mg, 91%).  $R_f$  = 0.20 (50% EtOAc/hexanes); <sup>1</sup>H NMR (400 MHz, CDCl<sub>3</sub>)  $\delta$  7.38 (d,  $J$  = 8.4 Hz, 2H), 6.83 (d,  $J$  = 8.4 Hz, 2H), 5.08 (s, 1H), 2.49 (dt,  $J$  = 7.2, 3.1 Hz, 1H), 2.45 (s, 3H), 2.36 (s, 3H), 2.04 (ddd,  $J$  = 9.7, 6.5, 3.0 Hz, 1H), 1.28 (ddd,  $J$  = 8.8, 6.5, 3.5 Hz, 1H), 1.15 (dd,  $J$  = 13.5, 6.4 Hz, 1H).; <sup>13</sup>C NMR (101 MHz, CDCl<sub>3</sub>)  $\delta$  174.14, 157.59, 138.25, 131.63, 127.50, 120.31, 115.33, 33.36, 24.27, 15.34, 12.59, 10.78.; HRMS (ESI): Exact mass calcd for C<sub>14</sub>H<sub>15</sub>BrN<sub>2</sub>O<sub>3</sub>S [M+H]<sup>+</sup> 369.9987, found 369.9984.

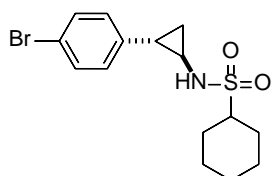

***trans*-N-(2-(4-bromophenyl)cyclopropyl)cyclohexanesulfonamide (12f).** To a vial equipped with a stir bar was added *N,N*-diisopropylethylamine (20.9  $\mu$ L, 120  $\mu$ mol), cyclohexanesulfonyl chloride (120  $\mu$ mol), *trans*-2-(4-bromophenyl)cyclopropan-1-amine (100  $\mu$ mol), and dichloromethane (0.50 mL). The reaction mixture allowed to stir at room temperature for 2 h. The reaction mixture was then diluted with dichloromethane and concentrated in vacuo. Flash column chromatography of the residue (SiO<sub>2</sub>, 5-10-20-40% ethyl acetate in hexanes) afforded the desired product as a white solid (14.2 mg, 41%).  $R_f$  = 0.35 (20% EtOAc/hexanes); <sup>1</sup>H NMR (400 MHz, CDCl<sub>3</sub>) 7.40 (d,  $J$  = 8.4 Hz, 2H), 6.99 (d,  $J$  = 8.4 Hz, 2H), 4.60 (s, 1H), 2.95 (tt,  $J$  = 12.1, 3.4 Hz, 1H), 2.65

(ddd,  $J = 7.2, 4.2, 1.4$  Hz, 1H), 2.27 – 2.12 (m, 3H), 1.97 – 1.84 (m, 2H), 1.72 (m, 2H), 1.39 – 1.29 (m, 2H), 1.24 – 1.15 (m, 4H).;  $^{13}\text{C}$  NMR (101 MHz,  $\text{CDCl}_3$ )  $\delta$  138.70, 131.56, 128.22, 120.17, 60.64, 33.84, 26.32, 26.27, 25.19, 24.73, 15.74.; HRMS (ESI): Exact mass calcd for  $\text{C}_{15}\text{H}_{20}\text{BrNO}_2\text{S}$   $[\text{M}+\text{H}]^+$  357.0398, found 357.0397.
